# Supplementary material for: Global expression analysis of the brown alga Ectocarpus siliculosus (Phaeophyceae) reveals large-scale reprogramming of the transcriptome in response to abiotic stress
Source: Genome Biol. 2009 Jun 16;10(6):R66. doi: 10.1186/gb-2009-10-6-r66 (PMC2718500; doi:10.1186/gb-2009-10-6-r66)
Supplement: Additional data file 1 — The tested stress conditions correspond to the conditions used for the microarray experiment (1,470 mM NaCl, 12.5% seawater, and 1 mM H2O2), but the duration of the stress treatments was 24 hours rather than 6 hours. [file gb-2009-10-6-r66-S1.xls]

## Sheet: Feuil1
	Mean (3 replicates)							Standard deviation
Time [h]	0	6	24	30	48	96	168	0	6	24	30	48	96	168
Control	0.65	0.67	0.66	0.64	0.64	0.65	0.65	0.0094	0.0058	0.01	0.0058	0.0173	0.0115	0.0058
1,470 mM NaCl	0.65	0.19	0.21	0.37	0.37	0.51	0.69	0.0094	0.01	0.0436	0.0907	0.085	0.0666	0.0265
12.5 % seawater	0.65	0.4	0.35	0.4	0.42	0.6	0.66	0.0094	0.0321	0.0252	0.0208	0.04	0.0503	0.0346
1 mM H2O2	0.65	0.33	0.37	0.45	0.45	0.56	0.63	0.0094	0.0462	0.1193	0.1415	0.0896	0.0709	0.0058
	line position
STRESS	0.1
RECOVERY	0.1
Vertical line	0.1	0.7
