# Supplementary material for: Global expression analysis of the brown alga Ectocarpus siliculosus (Phaeophyceae) reveals large-scale reprogramming of the transcriptome in response to abiotic stress
Source: Genome Biol. 2009 Jun 16;10(6):R66. doi: 10.1186/gb-2009-10-6-r66 (PMC2718500; doi:10.1186/gb-2009-10-6-r66)
Supplement: Additional data file 3 — All genes are grouped according to their putative function. [file gb-2009-10-6-r66-S3.xls]

## Sheet: ESC specific, unknown
sequence	genome eq.	significant in		annotated as	log2-ratio (hypo/control)	log2-ratio (hyper/control)	log2-ratio (oxi/control)	comments
LQ0AAB22YI22FM1.SCF	Esi0520_0001	oxi	DOWN	hypothetical protein	-3.50964	-1.72266	-2.98079
CL1403Contig1	Esi0370_0005	hypo	UP	hypothetical protein	1.38709	0.403922	1.3457
LQ0AAB27YJ18FM1.SCF	Esi0555_0002	hypo	DOWN	hypothetical protein	-5.72398	-0.91815	-2.35622
CL7145Contig1	Esi0700_0003	hypo	DOWN	hypothetical protein	-4.12108	-0.4993	-3.87439
CL2921Contig1	Esi0888_0001	hypo	DOWN	hypothetical protein	-1.82453	-0.756565	-1.542
CL4818Contig1	Esi0356_0029	hypo	DOWN	hypothetical protein	-6.67734	-1.44193	-3.10362
LQ0AAB34YC20FM1.SCF	Esi0356_0029	hyper	DOWN	hypothetical protein	0.317191	-2.21203	-0.528217
LQ0ACA1YD13RM1.SCF	Esi0155_0019	hypo	UP	hypothetical protein	2.00357	-0.273025	1.39634
CL1831Contig1	Esi0322_0029	hypo	UP	hypothetical protein	1.69999	0.287152	1.39862
CL2933Contig1	Esi0538_0009	oxi	UP	hypothetical protein	2.23182	1.10782	2.64156
LQ0AAB73YP05RM1.SCF	Esi0538_0009	oxi	UP	hypothetical protein	2.1287	1.44607	2.50703
LQ0AAB32YA07FM1.SCF	Esi0895_0001	oxi	UP	hypothetical protein	0.57713	-0.953609	1.85062
CL5588Contig1	Esi0006_0125	oxi	DOWN	hypothetical protein	-4.88034	-0.994049	-4.10988
LQ0AAB33YD19FM1.SCF	Esi0000_0051	oxi	DOWN	hypothetical protein	-4.82917	-4.25474	-4.17921
CL5334Contig1	Esi0000_0157	hyper	DOWN	hypothetical protein	-3.95053	-4.06077	-1.97046
LQ0AAB76YI24RM1.SCF	Esi0000_0374	hyper	UP	hypothetical protein	1.63863	1.24601	1.24746
CL2775Contig1	Esi0000_0390	hypo	UP	hypothetical protein	1.13064	0.991136	0.743739
CL1077Contig1	Esi0000_0407	hyper	DOWN	hypothetical protein	-0.636138	-1.91448	0.687172
CL4599Contig1	Esi0000_0552	hypo	UP	hypothetical protein	2.53027	1.06514	1.59253
LQ0AAB67YL14RM1.SCF	Esi0000_0637	oxi, hyper	UP	hypothetical protein	2.31648	3.85572	3.36697
LQ0AAB96YJ01RM1.SCF	Esi0002_0102	hypo	UP	hypothetical protein	2.28544	0.333951	1.76264
CL3340Contig1	Esi0002_0166	hyper	DOWN	hypothetical protein	-1.26353	-7.3174	-1.17565
LQ0AAB68YP21RM1.SCF	Esi0002_0202	hypo	DOWN	hypothetical protein	-2.29857	2.76544	1.2575
CL4606Contig1	Esi0002_0232	hypo	DOWN	hypothetical protein	-6.15616	0.725072	-1.39362
CL4482Contig1	Esi0002_0241	oxi, hypo	UP	hypothetical protein	1.99168	1.96025	2.2002
CL7703Contig1	Esi0002_0242	oxi, hypo	DOWN	hypothetical protein	-2.35106	-3.1288	-3.06456
LQ0AAB80YA19FM1.SCF	Esi0002_0262	oxi, hypo	UP	hypothetical protein	5.53513	1.01565	3.791
LQ0AAB71YK09RM1.SCF	Esi0002_0323	hypo	UP	hypothetical protein	1.67319	0.803299	-0.368191
LQ0AAB7YP05FM1.SCF	Esi0002_0330	hyper	DOWN	hypothetical protein	-0.333113	-1.47517	-0.117732
CL3035Contig1	Esi0002_0338	hypo	UP	hypothetical protein	1.25518	1.00909	-0.203805
LQ0ADA9YC06RM1.SCF	Esi0002_0338	hypo	UP	hypothetical protein	2.49561	1.64643	0.0408025
CL4510Contig1	Esi0002_0342	hypo	UP	hypothetical protein	1.93802	0.881382	1.34782
CL633Contig1	Esi0003_0082	hypo	UP	hypothetical protein	1.43962	1.02323	1.05222
CL4946Contig1	Esi0003_0208	hypo	UP	hypothetical protein	2.87055	1.1249	2.66751
LQ0AAB61YC19RM1.SCF	Esi0004_0146	hypo	UP	hypothetical protein	1.61521	-0.633221	-0.0336175
LQ0AAB60YE08FM1.SCF	Esi0004_0223	hypo	UP	hypothetical protein	3.63935	-3.88907	1.67657
LQ0AAA22YP17FM1.SCF	Esi0004_0225	oxi, hypo	DOWN	hypothetical protein	-3.75633	-2.79439	-3.9558
LQ0AAB57YB14FM1.SCF	Esi0004_0250	oxi, hypo	UP	hypothetical protein	1.39083	-0.491002	1.42388
LQ0AAB23YJ05FM1.SCF	Esi0004_0290	hyper	UP	hypothetical protein	2.05221	3.50879	0.0622316
CL5619Contig1	Esi0005_0009	hypo	DOWN	hypothetical protein	-2.23535	0.716081	-1.252
CL1281Contig1	Esi0006_0022	hypo	UP	hypothetical protein	2.1816	1.60678	1.92138
CL2949Contig1	Esi0006_0104	hyper	UP	hypothetical protein	0.397222	1.13263	-1.06425
LQ0AAB94YN04RM1.SCF	Esi0006_0191	oxi, hyper	UP	hypothetical protein	1.62696	2.39467	2.06191
CL4007Contig1	Esi0006_0221	hypo	UP	hypothetical protein	1.79758	-2.6552	0.734068
CL4772Contig1	Esi0007_0064	hypo	UP	hypothetical protein	1.6054	0.254996	1.03293
CL1070Contig1	Esi0008_0060	hypo	DOWN	hypothetical protein	-5.45918	-0.146131	-2.43811
CL299Contig1	Esi0008_0092	oxi	DOWN	hypothetical protein	-2.05569	-0.154301	-1.02139
LQ0AAB60YI01RM1.SCF	Esi0008_0243	hypo	DOWN	hypothetical protein	-1.61973	-0.780777	-0.332697
LQ0AAB36YD05FM1.SCF	Esi0008_0244	hyper	DOWN	hypothetical protein	-0.107435	-2.68163	-0.470965
CL3996Contig1	Esi0008_0248	hypo	UP	hypothetical protein	1.07452	-0.44429	-0.173354
CL7463Contig1	Esi0009_0040	hypo	DOWN	hypothetical protein	-4.84313	-0.844806	-2.60689
LQ0AAB37YM15FM1.SCF	Esi0009_0040	hypo	DOWN	hypothetical protein	-2.34242	-0.915956	-2.19455
CL1600Contig1	Esi0009_0072	hyper, hypo	UP	hypothetical protein	1.49205	1.352	1.33162
CL147Contig1	Esi0009_0084	hypo	UP	hypothetical protein	2.81056	0.218251	2.81076
CL2608Contig1	Esi0009_0089	hypo	UP	hypothetical protein	3.12133	2.3496	2.87325
LQ0AAB29YJ10FM1.SCF	Esi0010_0006	hyper	DOWN	hypothetical protein	-2.27608	-2.52507	-2.3152
LQ0AAB40YA13FM1.SCF	Esi0010_0110	hypo	UP	hypothetical protein	1.15923	1.19922	1.29936
CL2754Contig1	Esi0010_0120	hyper	DOWN	hypothetical protein	-1.01888	-2.10116	-0.298081
CL3569Contig1	Esi0010_0144	hypo	UP	hypothetical protein	3.72424	1.49636	-0.123186
LQ0AAB98YL04RM1.SCF	Esi0010_0145	hyper	UP	hypothetical protein	2.06531	3.75343	0.413544
LQ0AAB88YI05RM1.SCF	Esi0010_0155	hypo	UP	hypothetical protein	1.08075	-0.508251	0.942924
CL1848Contig1	Esi0011_0202	hyper	UP	hypothetical protein	0.332236	2.37331	0.866095
CL13Contig22	Esi0012_0020	hypo	UP	hypothetical protein	3.57595	0.864224	2.69685
LQ0AAB65YN11RM1.SCF	Esi0012_0039	oxi, hypo	UP	hypothetical protein	2.48058	0.0569584	1.82915
LQ0AAB28YI23FM1.SCF	Esi0012_0081	hypo	DOWN	hypothetical protein	-6.24333	-5.14778	-4.57895
CL5170Contig1	Esi0013_0116	oxi, hypo	UP	hypothetical protein	2.70742	1.01547	3.85209
CL3599Contig1	Esi0013_0168	hypo	DOWN	hypothetical protein	-3.82649	-2.77237	-0.915163
LQ0AAB96YE22RM1.SCF	Esi0014_0108	hyper	UP	hypothetical protein	-1.85614	1.63728	-1.39641
CL2575Contig1	Esi0014_0114	oxi, hyper, hypo	UP	hypothetical protein	3.05781	2.28763	2.58764
CL321Contig1	Esi0014_0222	hypo	DOWN	hypothetical protein	-4.28282	1.90369	0.180043
LQ0AAB41YI16FM1.SCF	Esi0014_0230	oxi	UP	hypothetical protein	1.02712	-0.137456	1.7091
CL3070Contig1	Esi0016_0018	hypo	DOWN	hypothetical protein	-1.62974	0.192517	-0.879286
CL13Contig10	Esi0016_0121	hypo	UP	hypothetical protein	3.61106	0.90733	3.12631
LQ0AAB74YC11RM1.SCF	Esi0016_0170	hypo	UP	hypothetical protein	2.44527	-2.33106	-2.23035
CL918Contig1	Esi0018_0059	hypo	UP	hypothetical protein	1.39105	0.335889	1.02534
CL4472Contig1	Esi0018_0061	hypo	DOWN	hypothetical protein	-4.03705	-0.887315	-1.98217
CL6267Contig1	Esi0018_0087	oxi	UP	hypothetical protein	0.288985	0.725267	1.20476
LQ0AAB99YN16FM1.SCF	Esi0018_0087	oxi	UP	hypothetical protein	0.88809	1.24955	1.68671
CL437Contig1	Esi0018_0161	hypo	DOWN	hypothetical protein	-1.12509	0.298985	-0.220132
CL7747Contig1	Esi0019_0008	hypo	DOWN	hypothetical protein	-5.74641	-1.8104	-2.51045
LQ0AAA17YK18FM1.SCF	Esi0019_0015	hypo	UP	hypothetical protein	7.65361	0.627581	5.56545
LQ0AEA3YI05RM1.SCF	Esi0019_0121	oxi	DOWN	hypothetical protein	-1.72584	-1.31747	-2.7844
CL2143Contig1	Esi0020_0065	hypo	UP	hypothetical protein	1.14742	0.17262	1.91201
CL6504Contig1	Esi0020_0081	hypo	UP	hypothetical protein	2.89304	0.829501	0.195513
CL3213Contig1	Esi0020_0117	hypo	UP	hypothetical protein	2.76623	1.09589	0.826296
LQ0AAB41YM11FM1.SCF	Esi0020_0146	hyper	DOWN	hypothetical protein	-0.321169	-2.40911	-0.306926
CL1759Contig1	Esi0020_0162	hypo	UP	hypothetical protein	2.37983	1.77198	1.78275
CL1949Contig1	Esi0021_0157	hyper	DOWN	hypothetical protein	-4.2879	-2.46863	-1.10482
LQ0AAA14YP03FM1.SCF	Esi0021_0167	hypo	UP	hypothetical protein	3.41375	-0.114271	1.0665
CL7310Contig1	Esi0021_0170	hypo	UP	hypothetical protein	2.51599	-0.654696	1.0015
CL6590Contig1	Esi0022_0069	oxi, hypo	UP	hypothetical protein	1.965	0.235588	1.8296
CL7716Contig1	Esi0022_0128	oxi, hypo	DOWN	hypothetical protein	-6.05754	-2.1429	-2.60968
CL2235Contig1	Esi0022_0161	hypo	DOWN	hypothetical protein	-1.40524	-1.57614	0.352783
CL7116Contig1	Esi0022_0174	hypo	UP	hypothetical protein	4.71186	0.537837	2.24293
LQ0AAA5YP01FM1.SCF	Esi0023_0015	hypo	DOWN	hypothetical protein	-1.99973	0.561705	-1.38389
CL3954Contig1	Esi0023_0114	hypo	DOWN	hypothetical protein	-1.73189	-0.541375	-0.342321
CL2694Contig1	Esi0023_0184	hypo	DOWN	hypothetical protein	-1.61495	0.708256	-0.613526
LQ0AAB21YD15FM1.SCF	Esi0024_0112	hypo	DOWN	hypothetical protein	-8.31955	-0.970114	-2.29406
CL47Contig1	Esi0024_0145	hypo	DOWN	hypothetical protein	-2.41037	0.17238	-1.1435
CL893Contig1	Esi0024_0155	hyper	UP	hypothetical protein	0.171617	2.0052	0.653452
CL2937Contig1	Esi0025_0068	hypo	DOWN	hypothetical protein	-5.07786	0.518428	-1.22619
LQ0ACA5YF10RM1.SCF	Esi0025_0093	hyper	UP	hypothetical protein	-2.14375	1.62624	-0.386707
LQ0AAB11YF04FM1.SCF	Esi0025_0108	hyper	DOWN	hypothetical protein	1.46526	-5.57005	0.171712
LQ0AEA9YO12RM1.SCF	Esi0026_0097	hypo	UP	hypothetical protein	1.6538	0.334121	0.812074
LQ0AAB54YO21FM1.SCF	Esi0027_0111	hypo	DOWN	hypothetical protein	-1.42914	1.15733	0.500585
LQ0AAB40YK13FM1.SCF	Esi0028_0029	hypo	UP	hypothetical protein	3.00816	-1.95405	1.22056
CL2706Contig1	Esi0028_0031	oxi, hypo	DOWN	hypothetical protein	-3.99043	-2.17534	-2.84978
LQ0AAB44YO21FM1.SCF	Esi0029_0025	hypo	DOWN	hypothetical protein	-3.98569	0.809577	-1.70382
CL403Contig1	Esi0029_0052	hyper	DOWN	hypothetical protein	0.496125	-2.37189	-0.096983
LQ0AAB104YB24FM1.SCF	Esi0030_0173	hypo	UP	hypothetical protein	1.72191	1.23576	1.17176
LQ0AAB1YD15RM1.SCF	Esi0031_0056	hypo	DOWN	hypothetical protein	-3.18935	-2.49443	-1.25657
LQ0AAB87YM05RM1.SCF	Esi0031_0080	hypo	UP	hypothetical protein	1.52851	0.402328	1.39425
LQ0AAB40YE03FM1.SCF	Esi0031_0122	oxi	DOWN	hypothetical protein	-1.21249	-1.30701	-1.98989
CL7151Contig1	Esi0032_0118	hypo	DOWN	hypothetical protein	-6.55016	-2.0874	-3.4303
CL5551Contig1	Esi0032_0155	hypo	UP	hypothetical protein	1.66943	-0.265215	0.61669
CL5013Contig1	Esi0033_0045	hypo	DOWN	hypothetical protein	-1.47267	0.363665	0.255514
LQ0AAA8YI04FM1.SCF	Esi0033_0100	hypo	UP	hypothetical protein	2.25891	-0.166925	0.185707
CL1243Contig1	Esi0036_0079	oxi	UP	hypothetical protein	0.40107	0.0872725	1.70272
CL367Contig1	Esi0036_0089	oxi, hyper	UP	hypothetical protein	1.24775	1.88096	1.46099
CL7471Contig1	Esi0037_0032	hypo	UP	hypothetical protein	3.75432	1.06914	0.756415
CL62Contig2	Esi0037_0121	hypo	DOWN	hypothetical protein	-2.24682	0.0523768	-0.229938
CL4728Contig1	Esi0038_0073	oxi	DOWN	hypothetical protein	-2.67533	-0.300611	-2.2662
CL1376Contig1	Esi0039_0036	oxi	DOWN	hypothetical protein	-2.7469	-1.38432	-1.78493
LQ0AAB49YI21FM1.SCF	Esi0039_0144	hypo	UP	hypothetical protein	1.97244	-1.67802	0.9635
CL13Contig20	Esi0040_0039	hypo	UP	hypothetical protein	2.92626	1.24384	1.81425
CL556Contig1	Esi0040_0051	hypo	UP	hypothetical protein	1.24601	-0.0703483	0.26084
CL2176Contig1	Esi0042_0030	oxi	UP	hypothetical protein	1.15382	0.030742	1.29116
LQ0AAB15YG01FM1.SCF	Esi0042_0137	hypo	DOWN	hypothetical protein	-7.37048	-1.14496	-5.05248
LQ0AAB32YE05FM1.SCF	Esi0043_0107	hyper	DOWN	hypothetical protein	-1.23995	-3.35139	-0.983098
CL1378Contig1	Esi0043_0112	oxi	UP	hypothetical protein	4.36774	1.92063	4.78299
CL1378Contig2	Esi0043_0114	hypo	UP	hypothetical protein	2.1577	0.877265	2.11734
LQ0AEA8YN04RM1.SCF	Esi0044_0052	hyper	UP	hypothetical protein	0.723202	1.60606	1.29926
CL4990Contig1	Esi0044_0120	hypo	UP	hypothetical protein	1.46471	-0.182466	1.67897
LQ0AAB99YM17FM1.SCF	Esi0044_0127	hyper, hypo	DOWN	hypothetical protein	4.86259	-4.17054	-1.50056
CL141Contig1	Esi0045_0021	oxi, hypo	UP	hypothetical protein	2.73007	1.10005	2.56616
CL3551Contig1	Esi0045_0065	hyper, hypo	UP	hypothetical protein	1.96202	2.15433	0.936461
LQ0AEA1YF21FM1.SCF	Esi0045_0069	hypo	UP	hypothetical protein	3.52915	1.98834	1.51871
CL1119Contig1	Esi0046_0093	hypo	UP	hypothetical protein	3.56104	4.93847	4.02788
LQ0AAB45YF20FM1.SCF	Esi0047_0032	hypo	DOWN	hypothetical protein	-4.1141	-1.31437	-0.662329
LQ0AAB40YB10FM1.SCF	Esi0047_0081	hypo	UP	hypothetical protein	3.91964	0.182275	0.802479
CL2124Contig1	Esi0049_0015	hypo	UP	hypothetical protein	2.25587	-2.54564	-1.53715
LQ0AAA4YM17FM1.SCF	Esi0049_0063	hypo	UP	hypothetical protein	4.34681	-0.981598	0.302118
LQ0ACA6YO11RM1.SCF	Esi0049_0121	hypo	UP	hypothetical protein	1.15495	0.300482	0.434403
CL5599Contig1	Esi0051_0064	hyper	DOWN	hypothetical protein	0.859633	-4.49149	1.61013
LQ0AAB98YN10RM1.SCF	Esi0051_0121	oxi, hypo	UP	hypothetical protein	2.58474	1.11424	2.15474
LQ0ACA13YG17RM1.SCF	Esi0053_0002	hypo	UP	hypothetical protein	1.46096	-0.261694	0.288928
CL2614Contig1	Esi0054_0015	hypo	DOWN	hypothetical protein	-7.35273	-0.599854	-1.88319
LQ0AAB41YB06FM1.SCF	Esi0054_0104	hypo	DOWN	hypothetical protein	-3.99183	0.113707	-2.69208
CL6712Contig1	Esi0055_0021	hypo	DOWN	hypothetical protein	-3.51663	-1.13902	-1.76576
LQ0ADA12YC02RM1.SCF	Esi0055_0046	hypo	DOWN	hypothetical protein	-6.25097	0.557051	-1.16815
CL1465Contig1	Esi0055_0093	hypo	UP	hypothetical protein	2.03093	-1.77689	1.13029
CL6563Contig1	Esi0056_0091	oxi, hypo	UP	hypothetical protein	4.12795	1.11256	3.92812
LQ0ACA24YJ13RM1.SCF	Esi0056_0119	hyper	UP	hypothetical protein	-1.66572	1.15487	-1.06647
LQ0ADA13YL08RM1.SCF	Esi0056_0123	hypo	UP	hypothetical protein	4.70767	1.14088	0.129051
LQ0AAA14YF14FM1.SCF	Esi0057_0031	hyper	DOWN	hypothetical protein	-0.847542	-3.34907	-0.852148
CL4258Contig1	Esi0057_0109	hyper	UP	hypothetical protein	1.37882	2.32036	0.840212
CL1647Contig1	Esi0058_0040	hypo	DOWN	hypothetical protein	-1.32325	-2.1444	-1.56647
CL3159Contig1	Esi0059_0046	hypo	DOWN	hypothetical protein	-3.74304	-0.929979	-2.45116
CL2525Contig1	Esi0059_0087	hypo	UP	hypothetical protein	2.30209	-0.43113	0.0473086
CL3218Contig1	Esi0059_0100	hyper, hypo	UP	hypothetical protein	1.93178	2.01503	2.15479
LQ0AAB78YO13FM1.SCF	Esi0059_0120	hypo	UP	hypothetical protein	4.44975	0.812814	0.729006
LQ0AAB78YO13RM1.SCF	Esi0059_0121	hypo	UP	hypothetical protein	2.09286	1.84124	-0.0572294
CL5726Contig1	Esi0059_0126	hypo	DOWN	hypothetical protein	-5.37247	0.130837	-2.64467
CL7589Contig1	Esi0059_0131	hypo	UP	hypothetical protein	1.86587	-0.244908	1.25245
CL4400Contig1	Esi0060_0082	hypo	UP	hypothetical protein	2.08993	0.688909	0.759679
LQ0AAB60YG13RM1.SCF	Esi0060_0091	hypo	DOWN	hypothetical protein	-1.67018	-0.281646	-0.283676
LQ0AAB50YC17FM1.SCF	Esi0062_0092	hypo	UP	hypothetical protein	4.80198	0.207486	1.24976
LQ0AAB50YD12FM1.SCF	Esi0062_0115	oxi	DOWN	hypothetical protein	-3.9635	0.164299	-1.38209
LQ0AAB43YI21FM1.SCF	Esi0063_0003	hyper	UP	hypothetical protein	0.0169551	2.38035	1.05816
CL7156Contig1	Esi0064_0045	hypo	DOWN	hypothetical protein	-6.69968	-0.674302	-2.80678
LQ0ADA17YE03RM1.SCF	Esi0064_0066	hypo	UP	hypothetical protein	2.48982	0.215803	0.0180667
LQ0AAA2YB15RM1.SCF	Esi0064_0071	oxi	DOWN	hypothetical protein	-0.693494	-1.51346	-2.1417
CL7051Contig1	Esi0065_0076	hypo	UP	hypothetical protein	1.77672	1.59518	-0.326497
LQ0AAB7YG14FM1.SCF	Esi0066_0045	hypo	UP	hypothetical protein	1.05569	1.01379	0.21621
LQ0AAB6YJ03FM1.SCF	Esi0067_0044	hypo	UP	hypothetical protein	1.55028	-1.74807	-1.17958
LQ0AAA16YK12FM1.SCF	Esi0069_0013	hyper	DOWN	hypothetical protein	-4.22063	-4.33692	-2.61197
CL5651Contig1	Esi0070_0111	hypo	DOWN	hypothetical protein	-1.47827	-0.0703865	-0.376098
CL5873Contig1	Esi0070_0124	hypo	UP	hypothetical protein	2.46919	1.66827	2.4921
CL3290Contig1	Esi0070_0128	oxi, hypo	UP	hypothetical protein	3.22592	2.74574	3.45272
CL3385Contig1	Esi0070_0128	oxi	UP	hypothetical protein	4.20315	2.95854	5.34097
CL3936Contig1	Esi0072_0093	hyper	DOWN	hypothetical protein	-1.21924	-1.24817	-2.21422
CL5529Contig1	Esi0072_0097	hypo	UP	hypothetical protein	5.57981	2.35338	4.81138
LQ0AAA6YA11FM1.SCF	Esi0072_0097	oxi, hypo	UP	hypothetical protein	4.8253	1.96448	4.67013
LQ0AEA7YD11RM1.SCF	Esi0072_0097	hypo	UP	hypothetical protein	2.59359	0.89393	2.61051
LQ0AAB97YC16FM1.SCF	Esi0073_0068	hyper, hypo	DOWN	hypothetical protein	-2.10879	-1.78108	-1.56139
CL6670Contig1	Esi0073_0070	hypo	DOWN	hypothetical protein	-5.51062	-3.07282	-3.35317
CL2538Contig1	Esi0074_0011	hypo	UP	hypothetical protein	1.0872	-0.165719	0.639799
CL280Contig4	Esi0076_0044	hyper	UP	hypothetical protein	0.153494	1.2961	-0.295835
CL7300Contig1	Esi0077_0022	hyper	DOWN	hypothetical protein	-1.34769	-3.16212	-2.30494
CL58Contig1	Esi0077_0074	hypo	UP	hypothetical protein	2.55585	1.23339	2.3658
LQ0AAB43YL03FM1.SCF	Esi0078_0050	hypo	DOWN	hypothetical protein	-3.09099	-1.28928	-2.16259
CL1045Contig1	Esi0079_0022	hypo	DOWN	hypothetical protein	-7.15136	-1.43165	-3.21488
LQ0AAB104YK10FM1.SCF	Esi0079_0071	oxi, hypo	UP	hypothetical protein	2.50644	0.815299	1.96678
CL5404Contig1	Esi0080_0027	hypo	UP	hypothetical protein	3.18682	2.97466	1.00544
LQ0ADA18YM14RM1.SCF	Esi0080_0093	hypo	DOWN	hypothetical protein	-1.55945	-0.386787	-1.3119
CL6575Contig1	Esi0081_0091	hypo	UP	hypothetical protein	4.70846	0.649763	2.90313
LQ0AAB2YA06FM1.SCF	Esi0081_0091	hypo	UP	hypothetical protein	3.74955	-0.624617	0.672902
CL7315Contig1	Esi0081_0104	oxi	DOWN	hypothetical protein	-0.92169	-2.3763	-3.61837
LQ0AAB33YJ24FM1.SCF	Esi0082_0016	hypo	DOWN	hypothetical protein	-4.51005	0.471388	-1.55197
CL6354Contig1	Esi0083_0032	hyper	DOWN	hypothetical protein	-0.287756	-1.46661	0.217421
CL4914Contig1	Esi0083_0049	oxi	UP	hypothetical protein	-0.850125	1.02613	2.25853
CL1509Contig1	Esi0085_0005	hypo	UP	hypothetical protein	5.33899	0.442592	-0.37725
CL1188Contig1	Esi0086_0026	hyper	DOWN	hypothetical protein	-0.811077	-2.25056	-0.565503
CL6390Contig1	Esi0086_0046	hyper	DOWN	hypothetical protein	1.38972	-2.32668	0.434232
CL4554Contig1	Esi0086_0059	hypo	UP	hypothetical protein	5.43961	1.4306	4.26276
CL7237Contig1	Esi0086_0059	oxi, hypo	UP	hypothetical protein	5.64252	-0.240091	4.48119
LQ0AAA21YN11FM1.SCF	Esi0087_0004	hyper	UP	hypothetical protein	2.82083	5.51792	-0.0287382
LQ0AAB36YK11FM1.SCF	Esi0087_0051	hypo	UP	hypothetical protein	2.84019	0.80977	-0.331558
CL3030Contig1	Esi0088_0006	oxi	UP	hypothetical protein	-2.32511	2.24489	2.3196
CL7600Contig1	Esi0088_0006	oxi	UP	hypothetical protein	-1.40031	1.5205	2.76502
LQ0AAB23YA06FM1.SCF	Esi0089_0044	hyper, hypo	UP	hypothetical protein	5.6709	6.15746	2.82479
LQ0AAB10YA08FM1.SCF	Esi0090_0001	hypo	UP	hypothetical protein	5.03318	-0.827699	-0.139326
CL1235Contig1	Esi0091_0004	hyper	DOWN	hypothetical protein	-0.00521713	-1.59017	-0.305531
CL7393Contig1	Esi0091_0023	hypo	DOWN	hypothetical protein	-5.34467	-1.50962	-1.0126
LQ0AAB89YE14FM1.SCF	Esi0093_0010	hypo	UP	hypothetical protein	3.034	1.1785	1.59178
CL1365Contig1	Esi0093_0012	hyper	UP	hypothetical protein	0.428665	1.33499	0.945278
LQ0AAB37YE12FM1.SCF	Esi0093_0056	hyper	UP	hypothetical protein	-1.96789	4.16317	-1.20904
CL6656Contig1	Esi0093_0059	hypo	DOWN	hypothetical protein	-4.59279	1.67388	-1.22484
LQ0AAB70YC10FM1.SCF	Esi0093_0059	hyper	UP	hypothetical protein	-3.48535	2.23916	-1.07072
LQ0AAB3YG08FM1.SCF	Esi0093_0066	hyper	UP	hypothetical protein	-2.22666	2.16641	-1.50615
LQ0AAB10YI22FM1.SCF	Esi0093_0077	hypo	DOWN	hypothetical protein	-2.76909	1.72482	0.33166
LQ0AAB104YF18FM1.SCF	Esi0094_0015	hypo	UP	hypothetical protein	1.84286	-4.7619	-3.0052
LQ0AFA6YA20RM1.SCF	Esi0094_0081	hyper	UP	hypothetical protein	-2.07039	4.71101	-0.792959
CL4055Contig1	Esi0095_0051	hypo	DOWN	hypothetical protein	-2.44621	0.031551	-0.734326
CL3413Contig1	Esi0095_0089	oxi	UP	hypothetical protein	5.21836	-0.0654909	5.27005
LQ0AAB76YB14FM1.SCF	Esi0096_0014	hyper	UP	hypothetical protein	1.42305	2.93207	1.54113
CL1339Contig1	Esi0096_0031	hypo	UP	hypothetical protein	2.15841	-0.626941	0.0683654
LQ0AAB80YM16RM1.SCF	Esi0096_0032	hypo	DOWN	hypothetical protein	-4.55558	-0.0959832	-0.449729
CL2799Contig1	Esi0096_0067	hyper	UP	hypothetical protein	-1.7275	3.60576	-0.833999
CL1900Contig1	Esi0096_0068	hypo	UP	hypothetical protein	4.43779	-0.332405	3.39499
CL2139Contig1	Esi0096_0072	oxi, hypo	UP	hypothetical protein	2.76048	2.08009	2.58374
CL6322Contig1	Esi0096_0082	oxi	DOWN	hypothetical protein	-4.21052	-0.814298	-2.52075
LQ0AAB96YM21RM1.SCF	Esi0097_0017	hypo	UP	hypothetical protein	1.79907	-3.97223	-0.839707
CL5572Contig1	Esi0098_0003	hyper	DOWN	hypothetical protein	1.54271	-5.6815	-1.53971
CL4485Contig1	Esi0098_0082	oxi	DOWN	hypothetical protein	-6.75384	-4.82881	-3.28885
LQ0AAB67YK13FM1.SCF	Esi0099_0021	hypo	UP	hypothetical protein	4.12074	-0.260111	0.566261
LQ0AAB53YM09RM1.SCF	Esi0099_0038	hypo	DOWN	hypothetical protein	-6.26919	-1.27538	-3.09226
LQ0AAB79YN05FM1.SCF	Esi0100_0008	hypo	UP	hypothetical protein	3.97955	1.21332	3.24504
LQ0AAB1YD09RM1.SCF	Esi0100_0047	hypo	UP	hypothetical protein	2.36029	0.132887	1.33
CL6761Contig1	Esi0101_0027	hyper	UP	hypothetical protein	0.68543	1.23268	-1.82415
CL3398Contig1	Esi0101_0047	hyper	DOWN	hypothetical protein	-0.11004	-1.48956	0.525202
LQ0AAB31YJ22FM1.SCF	Esi0103_0013	hypo	UP	hypothetical protein	1.34671	0.257102	1.17288
LQ0AAB68YD18FM1.SCF	Esi0103_0044	hyper	DOWN	hypothetical protein	-0.414959	-2.95706	-0.604027
CL5249Contig1	Esi0103_0048	hyper	UP	hypothetical protein	0.613468	1.6038	0.246141
CL2513Contig1	Esi0104_0059	oxi, hyper, hypo	UP	hypothetical protein	3.23668	3.58402	3.96862
LQ0AAB14YJ10FM1.SCF	Esi0105_0030	oxi	UP	hypothetical protein	2.74116	0.675259	2.64356
CL6189Contig1	Esi0105_0044	hypo	DOWN	hypothetical protein	-7.48682	-3.15391	-2.69765
LQ0AAB29YI07FM1.SCF	Esi0105_0061	hyper, hypo	DOWN	hypothetical protein	-4.82214	-3.33429	-4.53391
CL197Contig1	Esi0106_0009	oxi	DOWN	hypothetical protein	-4.57563	-1.42713	-2.67718
CL6249Contig1	Esi0107_0015	hyper	DOWN	hypothetical protein	-2.35382	-3.77604	-1.89385
LQ0AAB77YH24FM1.SCF	Esi0107_0068	oxi, hypo	UP	hypothetical protein	5.8881	0.431546	4.63215
LQ0AAB10YM14FM1.SCF	Esi0109_0019	oxi	UP	hypothetical protein	0.460793	0.632239	1.12563
LQ0AAB34YJ05FM1.SCF	Esi0109_0068	hypo	UP	hypothetical protein	2.7695	-0.065052	-1.83988
CL5267Contig1	Esi0110_0022	hypo	UP	hypothetical protein	1.39034	-0.627901	0.275863
LQ0AAA18YD08FM1.SCF	Esi0112_0014	hypo	UP	hypothetical protein	1.81227	-2.62548	1.10012
LQ0AAB99YH09RM1.SCF	Esi0112_0072	hypo	DOWN	hypothetical protein	-5.55411	0.0909877	-3.05629
LQ0AAB85YP14RM1.SCF	Esi0113_0046	oxi, hyper, hypo	UP	hypothetical protein	5.86097	4.17755	4.81753
LQ0AAA16YN11FM1.SCF	Esi0113_0079	hypo	UP	hypothetical protein	6.87621	0.517474	1.41905
LQ0AAB94YL23RM1.SCF	Esi0116_0062	hypo	UP	hypothetical protein	3.15307	1.50888	0.722001
LQ0AAB95YC21FM1.SCF	Esi0117_0038	hyper	DOWN	hypothetical protein	0.652872	-1.19608	-1.08869
LQ0AAB22YB01FM1.SCF	Esi0118_0027	hypo	UP	hypothetical protein	2.08395	-0.836926	0.691034
CL3341Contig1	Esi0120_0076	hypo	DOWN	hypothetical protein	-3.07027	0.312162	-1.44322
CL6495Contig1	Esi0121_0061	oxi, hyper, hypo	UP	hypothetical protein	4.33231	5.97318	3.9555
CL3495Contig1	Esi0122_0074	hypo	DOWN	hypothetical protein	-4.62673	0.815918	-1.22683
CL4687Contig1	Esi0124_0077	hypo	DOWN	hypothetical protein	-8.4463	-1.18894	-1.72459
LQ0AAB43YN05FM1.SCF	Esi0124_0077	hypo	DOWN	hypothetical protein	-8.60786	-0.494995	-1.45293
CL2095Contig1	Esi0125_0002	hypo	DOWN	hypothetical protein	-3.97868	-0.0698535	-1.81115
CL1422Contig1	Esi0125_0013	hypo	DOWN	hypothetical protein	-3.18005	0.330067	-1.17878
CL4840Contig1	Esi0125_0013	hypo	DOWN	hypothetical protein	-3.48953	1.33026	-1.80769
CL5761Contig1	Esi0125_0041	hypo	DOWN	hypothetical protein	-1.55872	-1.09402	-1.56357
LQ0AAB50YN24FM1.SCF	Esi0125_0074	oxi	DOWN	hypothetical protein	-4.17182	-2.2763	-4.1313
LQ0AAB72YC02FM1.SCF	Esi0126_0053	hypo	DOWN	hypothetical protein	-5.41086	0.985908	-0.0571032
CL2922Contig1	Esi0127_0020	hyper	DOWN	hypothetical protein	0.168122	-2.22404	0.515357
LQ0AAB11YJ07FM1.SCF	Esi0129_0068	hypo	UP	hypothetical protein	4.76794	0.367023	1.23868
LQ0AAB8YD22FM1.SCF	Esi0129_0068	hypo	UP	hypothetical protein	5.01661	0.209854	1.82319
CL3720Contig1	Esi0130_0017	oxi	UP	hypothetical protein	1.44626	-0.510427	1.66538
CL2832Contig1	Esi0131_0054	oxi	UP	hypothetical protein	1.1298	0.466985	1.1857
CL333Contig1	Esi0133_0037	oxi	UP	hypothetical protein	0.870913	0.606959	1.21089
CL1068Contig1	Esi0139_0015	hyper	UP	hypothetical protein	3.83652	4.59871	2.40962
LQ0ADA13YE22RM1.SCF	Esi0139_0054	hypo	UP	hypothetical protein	5.98552	1.68975	0.247377
CL7224Contig1	Esi0140_0060	hyper	UP	hypothetical protein	-1.28828	1.28466	-0.303195
CL463Contig1	Esi0140_0079	hyper	UP	hypothetical protein	1.36346	3.24858	1.21494
CL7149Contig1	Esi0141_0040	hyper	UP	hypothetical protein	1.97954	3.40243	0.169866
CL6265Contig1	Esi0142_0047	hyper	UP	hypothetical protein	1.8218	3.4909	1.2823
LQ0AAB63YI18FM1.SCF	Esi0143_0016	hypo	UP	hypothetical protein	3.86549	-0.676159	2.63645
LQ0AAB65YK14FM1.SCF	Esi0143_0016	oxi, hypo	UP	hypothetical protein	4.07498	1.89912	4.41325
CL4160Contig1	Esi0143_0038	hyper, hypo	UP	hypothetical protein	1.7522	1.85578	1.19057
CL2410Contig1	Esi0145_0006	oxi	UP	hypothetical protein	2.80803	0.825807	2.57438
LQ0AAB41YO15FM1.SCF	Esi0145_0015	oxi	DOWN	hypothetical protein	-4.67444	-1.53672	-3.36529
CL5623Contig1	Esi0145_0071	hyper	UP	hypothetical protein	0.0385276	1.48734	0.418153
CL615Contig1	Esi0146_0058	oxi	DOWN	hypothetical protein	-2.90107	-1.08611	-1.56398
CL3541Contig1	Esi0147_0016	hypo	UP	hypothetical protein	2.74716	-0.481182	1.53831
CL7025Contig1	Esi0147_0055	oxi	DOWN	hypothetical protein	-1.93031	0.742523	-2.29966
CL1784Contig1	Esi0147_0065	hyper	DOWN	hypothetical protein	-2.04111	-3.52771	-2.55972
CL2196Contig1	Esi0147_0080	oxi	UP	hypothetical protein	1.03054	0.0055283	1.25305
CL2053Contig1	Esi0149_0012	hypo	DOWN	hypothetical protein	-1.59434	-0.111254	-1.82453
CL3919Contig1	Esi0149_0043	hypo	DOWN	hypothetical protein	-2.79307	-1.35152	-2.00306
CL3969Contig1	Esi0149_0076	hyper	DOWN	hypothetical protein	-0.878212	-1.86697	0.00607466
LQ0AAB4YJ10FM1.SCF	Esi0151_0039	hyper	UP	hypothetical protein	-0.308348	1.30426	-0.166819
LQ0AAA1YA01RM1.SCF	Esi0152_0050	hyper	UP	hypothetical protein	0.695114	1.42452	0.585826
CL3399Contig1	Esi0152_0054	hypo	UP	hypothetical protein	1.81444	0.539628	0.455181
CL2666Contig1	Esi0153_0004	oxi	DOWN	hypothetical protein	-4.22763	-0.194885	-1.73504
LQ0AAA16YN10FM1.SCF	Esi0153_0004	hypo	DOWN	hypothetical protein	-5.8425	-2.87824	-2.62539
CL2573Contig1	Esi0154_0038	hypo	DOWN	hypothetical protein	-2.44721	-0.142837	-1.18092
LQ0AAB47YO04FM1.SCF	Esi0155_0004	hyper	UP	hypothetical protein	0.841304	2.11839	1.66504
CL1466Contig1	Esi0158_0044	hyper	DOWN	hypothetical protein	0.0578581	-1.39885	0.0338249
CL2472Contig1	Esi0161_0038	hypo	UP	hypothetical protein	1.36514	1.21875	0.0284049
CL7634Contig1	Esi0161_0041	hypo	UP	hypothetical protein	1.75567	-0.426768	0.982446
LQ0AAB56YL16RM1.SCF	Esi0161_0041	hypo	UP	hypothetical protein	1.76285	0.367567	0.660284
CL4860Contig1	Esi0163_0052	oxi	UP	hypothetical protein	0.978117	0.11962	1.20135
CL7734Contig1	Esi0163_0072	hypo	UP	hypothetical protein	3.57393	0.084733	3.37653
CL2560Contig1	Esi0164_0054	oxi	DOWN	hypothetical protein	-0.0724737	0.855805	-1.76896
LQ0AAB24YI08FM1.SCF	Esi0165_0034	oxi, hypo	UP	hypothetical protein	2.62792	1.09473	2.25688
CL6988Contig1	Esi0165_0064	hyper	DOWN	hypothetical protein	0.378965	-1.06675	0.294496
CL1078Contig1	Esi0166_0043	hypo	UP	hypothetical protein	3.10663	2.18394	1.52416
CL4743Contig1	Esi0167_0017	hypo	UP	hypothetical protein	1.48153	0.355852	1.14126
CL6832Contig1	Esi0167_0079	hypo	DOWN	hypothetical protein	-1.08258	-1.11212	-0.215043
LQ0AAB30YL24FM1.SCF	Esi0168_0065	oxi, hypo	UP	hypothetical protein	2.60518	0.445607	2.62147
LQ0AAB16YO04FM3.SCF	Esi0169_0002	hypo	UP	hypothetical protein	1.76527	1.43992	1.8769
LQ0AAB58YJ23FM1.SCF	Esi0171_0023	oxi	UP	hypothetical protein	1.53036	-1.79071	2.00487
CL7732Contig1	Esi0172_0021	hyper	DOWN	hypothetical protein	-7.00012	-1.22281	-2.89099
CL2897Contig1	Esi0172_0028	hypo	DOWN	hypothetical protein	-4.57336	-0.663343	-2.31401
LQ0AEA4YD24RM1.SCF	Esi0174_0070	hypo	UP	hypothetical protein	1.93866	1.25334	0.59606
LQ0AAB26YB24FM1.SCF	Esi0175_0016	hypo	DOWN	hypothetical protein	-2.70924	0.494642	-2.03836
LQ0AFA6YF08RM1.SCF	Esi0179_0007	hyper	UP	hypothetical protein	3.4271	4.9488	4.70069
CL1367Contig1	Esi0179_0008	hyper, hypo	UP	hypothetical protein	2.35048	1.3956	3.18961
CL2000Contig1	Esi0179_0009	oxi	UP	hypothetical protein	2.602	1.68056	2.89402
CL1843Contig1	Esi0179_0010	hypo	UP	hypothetical protein	4.73156	1.16091	3.84932
CL486Contig1	Esi0179_0010	hypo	UP	hypothetical protein	5.44611	1.07296	4.73547
CL486Contig2	Esi0179_0010	oxi	UP	hypothetical protein	4.48303	0.74902	3.82748
CL486Contig3	Esi0179_0010	oxi	UP	hypothetical protein	5.33369	0.241592	4.73398
CL906Contig1	Esi0179_0049	oxi	UP	hypothetical protein	-0.882215	0.783726	1.10507
CL1445Contig1	Esi0180_0022	hypo	DOWN	hypothetical protein	-1.43915	0.57206	-0.300369
CL806Contig1	Esi0180_0041	oxi, hyper, hypo	UP	hypothetical protein	2.88335	1.43414	2.54087
LQ0AAB44YF16FM1.SCF	Esi0180_0041	oxi	UP	hypothetical protein	2.0425	1.3125	2.12723
CL6666Contig1	Esi0181_0044	hyper	UP	hypothetical protein	-3.234	3.84871	-0.596883
LQ0AAB6YK13FM1.SCF	Esi0181_0068	hypo	DOWN	hypothetical protein	-3.59672	-0.728052	-1.59888
CL5137Contig1	Esi0182_0010	hypo	UP	hypothetical protein	7.29784	0.903136	4.1555
CL6220Contig1	Esi0182_0010	oxi, hypo	UP	hypothetical protein	6.11759	2.07188	3.83551
LQ0AAB27YC22FM1.SCF	Esi0182_0040	hypo	DOWN	hypothetical protein	-5.78583	0.566257	-1.51539
LQ0AAB69YJ14RM1.SCF	Esi0183_0032	hyper	UP	hypothetical protein	1.17229	1.72929	0.015007
CL7783Contig1	Esi0183_0039	hypo	UP	hypothetical protein	6.28554	0.603621	3.00754
CL4804Contig1	Esi0185_0046	hyper	DOWN	hypothetical protein	-4.78838	-1.46521	-2.65358
LQ0AAB76YC22FM1.SCF	Esi0187_0004	hypo	DOWN	hypothetical protein	-1.95324	-1.3711	-1.22426
CL44Contig3	Esi0188_0005	hypo	DOWN	hypothetical protein	-2.82897	-1.77483	-1.41062
CL4339Contig1	Esi0193_0025	hypo	UP	hypothetical protein	1.31436	-0.53259	0.955473
CL1847Contig1	Esi0193_0060	hypo	UP	hypothetical protein	1.10336	-0.588725	0.179345
LQ0AAB91YH22FM1.SCF	Esi0194_0024	hypo	UP	hypothetical protein	5.50811	0.028603	0.284494
LQ0ABA2YL09FM1.SCF	Esi0195_0005	oxi	UP	hypothetical protein	2.48908	1.42717	3.60686
LQ0AAB23YL04FM1.SCF	Esi0198_0028	hypo	UP	hypothetical protein	1.92544	-2.99004	1.19173
CL1991Contig1	Esi0198_0046	oxi, hyper	UP	hypothetical protein	0.42266	1.52137	1.33037
LQ0AAA10YM17FM1.SCF	Esi0200_0004	hyper	UP	hypothetical protein	0.00227385	4.05075	0.57346
CL2630Contig1	Esi0205_0029	hypo	DOWN	hypothetical protein	-3.87555	-2.43686	-1.93549
LQ0AAB33YN14FM1.SCF	Esi0205_0029	hypo	DOWN	hypothetical protein	-4.19409	-2.37258	-1.69517
LQ0AAB10YF21FM1.SCF	Esi0207_0042	hypo	DOWN	hypothetical protein	-4.4039	0.997245	-2.71064
LQ0AAB11YL08FM1.SCF	Esi0207_0042	hypo	DOWN	hypothetical protein	-4.77939	1.19937	-2.68005
LQ0AAB22YO18FM1.SCF	Esi0209_0045	hypo	UP	hypothetical protein	2.0724	1.26278	1.23675
CL3372Contig1	Esi0210_0045	oxi, hypo	DOWN	hypothetical protein	-3.61033	1.61262	-3.4233
CL13Contig23	Esi0213_0020	hypo	DOWN	hypothetical protein	-1.5446	-1.55997	-1.24464
CL100Contig1	Esi0216_0039	hyper	UP	hypothetical protein	-2.87097	2.81993	0.64317
CL2225Contig1	Esi0219_0017	hypo	DOWN	hypothetical protein	-6.95721	-2.78361	-2.27648
CL2505Contig1	Esi0219_0034	hypo	DOWN	hypothetical protein	-5.70455	-0.578442	0.785884
LQ0AAA20YO07FM1.SCF	Esi0220_0034	hypo	UP	hypothetical protein	3.29772	1.2414	-0.992863
LQ0AAB23YD06FM1.SCF	Esi0220_0059	hyper	UP	hypothetical protein	0.879544	2.48662	0.0609843
CL2673Contig1	Esi0228_0042	hypo	UP	hypothetical protein	2.35563	0.473922	2.0379
LQ0ACA22YG07RM1.SCF	Esi0234_0034	oxi	UP	hypothetical protein	2.37129	-0.336114	2.23203
CL13Contig16	Esi0236_0022	hypo	UP	hypothetical protein	3.97972	1.24237	3.158
LQ0AAA2YO07FM1.SCF	Esi0238_0030	hypo	UP	hypothetical protein	1.97844	-0.0742032	1.44389
CL6817Contig1	Esi0242_0034	hypo	DOWN	hypothetical protein	-6.04522	-2.87555	-4.14961
CL3801Contig1	Esi0243_0021	hypo	DOWN	hypothetical protein	-1.91743	-0.715523	-0.72748
CL3943Contig1	Esi0244_0032	hypo	UP	hypothetical protein	3.452	-1.11844	2.68518
CL4308Contig1	Esi0245_0029	oxi, hyper	UP	hypothetical protein	2.33959	1.87462	2.82846
CL6003Contig1	Esi0246_0050	hypo	UP	hypothetical protein	1.56153	0.397605	0.278136
LQ0AAB52YF23FM1.SCF	Esi0247_0026	hypo	UP	hypothetical protein	1.41987	-0.946339	0.944339
CL2999Contig1	Esi0249_0026	oxi	DOWN	hypothetical protein	-2.86466	-1.06211	-1.45631
LQ0AAB8YN04FM1.SCF	Esi0249_0026	hypo	DOWN	hypothetical protein	-1.87842	-0.44056	-1.50962
CL902Contig1	Esi0250_0016	hyper	UP	hypothetical protein	0.0479298	1.9052	-0.133217
CL1626Contig1	Esi0251_0018	hyper	DOWN	hypothetical protein	1.60321	-2.75505	1.02546
CL1626Contig2	Esi0251_0018	hyper	DOWN	hypothetical protein	0.536885	-5.92042	0.317194
CL929Contig1	Esi0254_0007	hypo	DOWN	hypothetical protein	-1.54794	-0.781967	0.0812799
CL259Contig1	Esi0255_0014	hyper	UP	hypothetical protein	-4.00857	2.15338	-0.697319
LQ0AAB67YJ11FM1.SCF	Esi0255_0035	hyper	UP	hypothetical protein	-0.266459	2.22358	-2.44217
CL5638Contig1	Esi0259_0026	hypo	UP	hypothetical protein	2.53263	1.40489	1.17974
LQ0AAB35YO06FM1.SCF	Esi0261_0039	hypo	UP	hypothetical protein	3.11667	1.62426	2.05243
LQ0AAB34YN16FM1.SCF	Esi0261_0042	hypo	DOWN	hypothetical protein	-4.33631	-1.65417	-2.53175
LQ0AFA3YG14RM1.SCF	Esi0262_0005	hypo	UP	hypothetical protein	2.36345	1.88871	2.75711
CL5903Contig1	Esi0264_0003	hypo	UP	hypothetical protein	2.10683	-1.6606	1.26531
CL1661Contig1	Esi0264_0022	hypo	UP	hypothetical protein	2.21213	0.209208	1.29457
CL820Contig1	Esi0264_0023	hypo	UP	hypothetical protein	1.05956	-0.51777	0.351583
LQ0AAB66YP24RM1.SCF	Esi0264_0024	hypo	UP	hypothetical protein	1.78091	-1.11001	1.24746
CL3794Contig1	Esi0266_0003	hyper	UP	hypothetical protein	0.985817	5.97069	1.41293
LQ0AAA12YK03FM1.SCF	Esi0266_0006	hypo	UP	hypothetical protein	3.63977	-0.697451	3.29696
LQ0AEA7YJ02RM1.SCF	Esi0266_0006	hypo	UP	hypothetical protein	2.33175	0.953622	1.7298
CL7325Contig1	Esi0266_0008	hyper, hypo	UP	hypothetical protein	1.69054	1.63314	0.471974
LQ0AAB31YD17FM1.SCF	Esi0269_0011	hypo	UP	hypothetical protein	6.32964	0.921292	0.532562
CL7142Contig1	Esi0270_0013	hypo	DOWN	hypothetical protein	-5.23598	1.70581	-1.08883
CL7679Contig1	Esi0272_0023	hypo	UP	hypothetical protein	1.19419	0.898585	0.737767
LQ0AAB5YH06FM1.SCF	Esi0274_0024	hypo	DOWN	hypothetical protein	-7.03887	0.271942	-3.33752
LQ0AAB45YC17FM1.SCF	Esi0277_0037	oxi	UP	hypothetical protein	1.16556	0.294163	3.18939
CL7252Contig1	Esi0278_0021	oxi	UP	hypothetical protein	3.69414	2.15674	5.32966
CL5647Contig1	Esi0279_0035	hypo	UP	hypothetical protein	3.28073	0.259096	1.8636
LQ0AAB21YC15FM1.SCF	Esi0281_0047	hypo	UP	hypothetical protein	2.08391	-0.816019	0.28933
CL1566Contig1	Esi0289_0016	hypo	UP	hypothetical protein	1.6683	0.53845	-0.0617549
CL4227Contig1	Esi0291_0031	hyper	DOWN	hypothetical protein	-0.0650394	-1.54172	0.262099
CL718Contig1	Esi0293_0014	oxi	UP	hypothetical protein	0.5123	-0.842324	2.72652
CL1001Contig1	Esi0300_0012	hypo	DOWN	hypothetical protein	-6.82165	-1.09794	-2.91894
CL953Contig1	Esi0311_0009	oxi	DOWN	hypothetical protein	-2.46041	0.210529	-1.33848
LQ0AFA5YC20RM1.SCF	Esi0313_0024	hyper	UP	hypothetical protein	3.0096	5.13536	2.13388
CL7240Contig1	Esi0314_0020	hyper	DOWN	hypothetical protein	0.0332266	-1.63221	0.308884
LQ0AAB37YM03FM1.SCF	Esi0322_0026	hypo	UP	hypothetical protein	2.75726	-0.317265	0.797448
LQ0ADA17YJ22RM1.SCF	Esi0326_0012	hyper	UP	hypothetical protein	-1.44316	1.15262	0.281271
LQ0AAA1YC03FM1.SCF	Esi0332_0023	oxi, hypo	UP	hypothetical protein	7.16728	6.01188	3.99741
CL1570Contig1	Esi0333_0020	hyper	UP	hypothetical protein	-1.33744	5.21245	0.920515
LQ0AAA5YP18FM1.SCF	Esi0340_0026	hyper	DOWN	hypothetical protein	-1.16104	-2.33175	-0.522197
CL4820Contig1	Esi0348_0007	hypo	UP	hypothetical protein	4.00064	0.540341	1.02286
CL5639Contig1	Esi0349_0023	hyper	UP	hypothetical protein	1.02266	1.12018	0.882298
CL6223Contig1	Esi0362_0013	oxi	DOWN	hypothetical protein	-0.310713	-0.0836968	-1.69115
CL64Contig1	Esi0366_0002	hypo	UP	hypothetical protein	5.24582	2.84996	4.74415
CL1481Contig1	Esi0366_0004	hypo	UP	hypothetical protein	4.65651	3.43871	4.23593
CL3252Contig1	Esi0381_0004	oxi	DOWN	hypothetical protein	-4.5048	-1.14896	-1.24698
LQ0AAB27YM03FM1.SCF	Esi0387_0023	hypo	UP	hypothetical protein	5.19855	3.09808	2.22059
CL693Contig1	Esi0398_0020	hypo	UP	hypothetical protein	3.41384	2.08554	2.1092
LQ0ACA6YB07RM1.SCF	Esi0425_0021	hyper	UP	hypothetical protein	-0.284847	2.56034	0.583684
LQ0AAB21YL02FM1.SCF	Esi0432_0020	hypo	DOWN	hypothetical protein	-3.11655	-1.54751	-0.946747
LQ0ACA20YM10RM1.SCF	Esi0453_0015	hyper	DOWN	hypothetical protein	-2.50139	-2.45524	-1.22349
LQ0AAB80YN05RM1.SCF	Esi0457_0018	hypo	DOWN	hypothetical protein	-6.36884	-1.1531	-1.71495
LQ0ACA8YG08RM1.SCF	Esi0471_0003	oxi	DOWN	hypothetical protein	-3.137	-0.444037	-1.77978
LQ0AAA1YK22RM1.SCF	Esi0474_0003	hyper	UP	hypothetical protein	-0.243622	1.42089	-0.892999
LQ0AAB50YM12FM1.SCF	Esi0485_0002	hypo	UP	hypothetical protein	3.22508	-1.7376	-0.022736
CL5936Contig1	Esi0488_0012	oxi	UP	hypothetical protein	1.18318	0.399053	1.73172
LQ0AAB48YK12FM1.SCF	Esi0488_0012	hypo	UP	hypothetical protein	2.73011	0.799733	3.04455
LQ0ADA19YJ04RM1.SCF	Esi0521_0009	hyper	UP	hypothetical protein	0.37905	2.74133	0.237586
CL7420Contig1	Esi0534_0005	hypo	DOWN	hypothetical protein	-2.03072	0.194002	-0.600585
CL6741Contig1	Esi0536_0015	hypo	DOWN	hypothetical protein	-6.31055	-1.18034	-2.84458
LQ0AAA14YG10FM1.SCF	Esi0536_0015	hypo	DOWN	hypothetical protein	-4.20173	-0.362107	-2.05508
LQ0AAB49YH04FM1.SCF	Esi0623_0001	oxi	UP	hypothetical protein	-0.579203	-1.46043	2.81506
LQ0AAB88YA23FM1.SCF	Esi0623_0001	oxi	UP	hypothetical protein	-1.33609	-1.46843	1.755
CL1125Contig2	Esi1051_0001	hyper	UP	hypothetical protein	2.01315	3.19931	1.84169
CL3280Contig1	Esi1123_0001	hypo	UP	hypothetical protein	3.13415	-1.23645	0.867048
CL5743Contig1	Esi1709_0001	hyper	UP	hypothetical protein	-0.646473	1.61939	0.0765936

## Sheet: Conserved, unknown
sequence	genome eq.	significant in		annotated as	log2-ratio (hypo/control)	log2-ratio (hyper/control)	log2-ratio (oxi/control)	comments
LQ0ADA16YP05RM1.SCF	Esi0322_0030	hypo	DOWN	conserved hypothetical protein	-2.39594	-0.58249	-1.90276	hits with several species
CL6348Contig1	Esi0162_0026	hyper	DOWN	conserved hypothetical protein	-0.126779	-2.67346	0.0191959	hits only with arabidopsis and bacteria
CL922Contig1	Esi1541_0001	hypo	DOWN	conserved hypothetical protein	-4.24785	-4.04739	-1.8039	hits with several species
CL408Contig2	Esi0486_0003	hypo	DOWN	conserved hypothetical protein	-1.99983	0.245294	-1.45758	hits with several species
CL3759Contig1	Esi0029_0039	hyper	DOWN	conserved hypothetical protein	0.417783	-2.62532	0.167614	hits with several species
LQ0AAB30YL22FM1.SCF	Esi0053_0007	hypo	DOWN	conserved hypothetical protein	-2.83181	-2.27208	-1.014	hits only with diatoms and green lineage
LQ0AAB14YM15FM1.SCF	Esi0080_0098	hypo	DOWN	conserved hypothetical protein	-4.52552	0.485344	-1.22949	hits only with diatoms and green lineage
CL4301Contig1	Esi0147_0021	hypo	DOWN	conserved hypothetical protein	-5.40452	-0.562764	-1.69993	hits only with diatoms and green lineage
CL1036Contig1	Esi0080_0015	oxi	DOWN	conserved hypothetical protein	-6.75328	-0.978728	-3.09318	htis only with fungi and bacteria
CL1778Contig1	Esi0130_0062	hypo	DOWN	conserved hypothetical protein	-2.40602	1.78987	-0.160977	hits only with green lineage
CL3604Contig1	Esi0098_0014	hypo	DOWN	conserved hypothetical protein	-2.0881	-0.416669	-0.966902	hits with several species
CL5956Contig1	Esi0004_0085	hypo	DOWN	conserved hypothetical protein	-3.63541	1.03504	-0.876162	hits with several species
CL7094Contig1	Esi0024_0057	hyper	DOWN	conserved hypothetical protein	0.899024	-1.83055	0.541161	hits with several species
CL1903Contig1	Esi0029_0141	hypo	DOWN	conserved hypothetical protein	-4.57398	0.435692	-2.09817	hits with several species
LQ0AAB45YC08FM1.SCF	Esi0063_0124	oxi	DOWN	conserved hypothetical protein	-1.37334	0.658663	-1.18299	hits with several species
LQ0AAB96YM22FM1.SCF	Esi0074_0058	hypo	DOWN	conserved hypothetical protein	-5.50079	-0.491718	-3.19688	hits with several species
CL4865Contig1	Esi0092_0068	hyper	DOWN	conserved hypothetical protein	-0.445422	-1.6992	-1.15208	hits with several species
LQ0AAB28YO03FM1.SCF	Esi0125_0003	hypo	DOWN	conserved hypothetical protein	-3.34869	-2.47048	-3.59636	hits with several species
LQ0AAB10YF17FM1.SCF	Esi0167_0013	hyper	DOWN	conserved hypothetical protein	-1.85849	-4.17933	-3.72649	hits with several species
CL5568Contig1	Esi0300_0013	oxi	DOWN	conserved hypothetical protein	-2.29708	-0.0815532	-1.87436	hits only with bacteria
CL6380Contig1	Esi0146_0048	hypo	DOWN	conserved hypothetical protein	-6.7762	-0.628718	-3.65437	hits only with bacteria
CL7627Contig1	Esi0180_0015	hypo	DOWN	conserved hypothetical protein	-2.3554	-0.817466	-1.3824	hits only with bacteria
CL2119Contig1	Esi0462_0010	oxi, hypo	DOWN	conserved hypothetical protein	-4.06603	-1.94271	-2.50712	hits only with bacteria
LQ0AAB38YP03FM1.SCF	Esi0020_0148	hypo	DOWN	conserved hypothetical protein	-5.3413	-3.53819	-4.54183	hits only with bacteria
CL1202Contig1	Esi0056_0076	hypo	DOWN	conserved hypothetical protein	-2.25762	-0.930099	-0.844952	hits only with bacteria
LQ0AAB73YJ18FM1.SCF	Esi0123_0058	hyper	DOWN	conserved hypothetical protein	-1.19931	-3.58564	-0.107158	hits only with bacteria
CL3237Contig1	Esi0148_0038	oxi	DOWN	conserved hypothetical protein	-3.93806	0.774955	-3.32744	hits only with bacteria
CL6842Contig1	Esi0022_0113	oxi	DOWN	conserved hypothetical protein	-4.55261	-1.34369	-3.83328	hits only with green lineage
LQ0AAB52YF08RM1.SCF	Esi0074_0067	hyper	DOWN	conserved hypothetical protein	-6.56042	-2	-2.65603	hits only with fungi
CL2758Contig1	Esi0317_0028	hypo	DOWN	conserved hypothetical protein	-1.99501	0.389848	-1.23383	hits with several species
LQ0AAB43YG13FM1.SCF	Esi0119_0101	hypo	DOWN	conserved hypothetical protein	-6.51733	0.813636	-1.71816	hits only with phaeodactylum and marine bacteria
CL3658Contig1	Esi0322_0006	hypo	DOWN	conserved hypothetical protein	-3.41555	-0.295359	-2.03501	hits only with phaeodactylum and green lineage
CL4440Contig1	Esi0322_0006	hypo	DOWN	conserved hypothetical protein	-7.36126	0.160693	-3.21764	hits only with phaeodactylum and green lineage
CL7437Contig1	Esi0305_0037	hypo	DOWN	conserved hypothetical protein	-2.8691	-1.89761	-2.15493	hits with several species
CL4410Contig1	Esi0087_0047	hypo	DOWN	conserved hypothetical protein	-4.93278	-0.19239	-1.92969	hits with several species
CL3766Contig1	Esi0095_0051	hypo	DOWN	conserved hypothetical protein	-6.10024	1.03345	-0.789905	hits with several species
LQ0AAB49YI12FM1.SCF	Esi0119_0038	hypo	DOWN	conserved hypothetical protein	-4.45501	-3.35924	1.73838	hits with several species
CL4669Contig1	Esi0230_0012	oxi	DOWN	conserved hypothetical protein	-1.85779	0.559158	-1.06333	hits with several species
CL1405Contig1	Esi0248_0021	hypo	DOWN	conserved hypothetical protein	-1.74104	0.147156	-1.1037	hits with several species
CL1697Contig1	Esi0252_0008	oxi	DOWN	conserved hypothetical protein	-0.220252	1.20972	-1.20223	hits with several species
CL4246Contig1	Esi0131_0028	hypo	DOWN	conserved hypothetical protein	-4.17473	0.668791	-3.3859	hits only with heterokonts and bacteria
LQ0AAB42YI20FM1.SCF	Esi0297_0018	oxi	DOWN	conserved hypothetical protein	-5.36051	-1.65144	-3.28843	hits with several species
LQ0AAB37YL12FM1.SCF	Esi0063_0089	hypo	DOWN	conserved hypothetical protein	-5.24063	0.569294	-1.15289	hits only with calydomonas
CL6573Contig1	Esi0297_0030	hyper	UP	conserved hypothetical protein	0.280842	2.51393	-0.432845	hits with several species
CL2229Contig1	Esi0006_0213	oxi	UP	conserved hypothetical protein	2.58522	0.123142	3.82368	hits with several species
CL107Contig8	Esi0025_0118	oxi	UP	conserved hypothetical protein	1.21597	-2.59492	1.40587	hits only with diatoms and bacteria
CL4Contig2	Esi0015_0186	hyper	UP	conserved hypothetical protein	0.562945	2.80916	-0.466666	hits with several species
LQ0AAB15YB03FM1.SCF	Esi0081_0090	hypo	UP	conserved hypothetical protein	2.36955	-0.680518	1.86479	hits only with green lineage and phyophtora
LQ0AAB6YP01FM1.SCF	Esi0002_0214	oxi, hypo	UP	conserved hypothetical protein	1.96181	0.653253	2.19128	hits with several species
LQ0AAB84YG06RM1.SCF	Esi0004_0085	hyper, hypo	UP	conserved hypothetical protein	-1.40576	1.36384	-0.71615	hits with several species
CL6901Contig1	Esi0010_0195	hypo	UP	conserved hypothetical protein	1.34851	0.514986	-0.0294988	hits with several species
LQ0AAB80YE05RM1.SCF	Esi0011_0028	hypo	UP	conserved hypothetical protein	3.17928	3.37561	1.3209	hits with several species
CL1775Contig1	Esi0022_0051	hyper, hypo	UP	conserved hypothetical protein	2.54813	2.914	1.99526	hits with several species
LQ0AAB29YJ17FM1.SCF	Esi0022_0051	hyper	UP	conserved hypothetical protein	-0.555313	3.045	-0.00553602	hits with several species
CL1597Contig1	Esi0024_0160	oxi	UP	conserved hypothetical protein	1.09427	0.909606	2.21094	hits with several species
CL5307Contig1	Esi0025_0063	oxi, hypo	UP	conserved hypothetical protein	3.23308	0.164123	3.20034	hits with several species
CL7206Contig1	Esi0025_0063	oxi, hypo	UP	conserved hypothetical protein	3.68862	0.374555	3.29501	hits with several species
LQ0AAA4YE01FM1.SCF	Esi0027_0108	hypo	UP	conserved hypothetical protein	3.47251	-0.512437	2.06812	hits with several species
CL6153Contig1	Esi0034_0121	hypo	UP	conserved hypothetical protein	2.83008	0.791483	1.57475	hits with several species
CL6773Contig1	Esi0046_0023	hypo	UP	conserved hypothetical protein	1.15038	-0.606419	-0.285204	hits with several species
CL6483Contig1	Esi0047_0025	hyper	UP	conserved hypothetical protein	-5.60544	1.07435	-0.608058	hits with several species
CL2152Contig1	Esi0061_0125	hyper	UP	conserved hypothetical protein	-0.883814	1.2242	-0.181327	hits with several species
CL4901Contig1	Esi0072_0053	hyper	UP	conserved hypothetical protein	1.7449	3.04066	1.01146	hits with several species
CL4767Contig1	Esi0157_0041	hypo	UP	conserved hypothetical protein	2.292	-0.883613	0.785545	hits with several species
CL4022Contig1	Esi0175_0051	hypo	UP	conserved hypothetical protein	2.29449	0.652274	1.97296	hits with several species
CL7409Contig1	Esi0199_0045	oxi, hypo	UP	conserved hypothetical protein	2.04707	0.742274	1.33657	hits with several species
LQ0AFA7YE07RM1.SCF	Esi0277_0014	oxi, hypo	UP	conserved hypothetical protein	2.14772	-0.00949573	2.28263	hits with several species
CL3642Contig1	Esi0278_0043	oxi	UP	conserved hypothetical protein	1.21707	1.82908	4.34537	hits with several species
CL4001Contig1	Esi0055_0056	hyper	UP	conserved hypothetical protein	0.102437	4.30793	1.29026	hits only with bacteria
CL3040Contig1	Esi0125_0012	oxi	UP	conserved hypothetical protein	3.31414	-0.564138	3.50052	hits only with bacteria
LQ0AAB68YN02RM1.SCF	Esi0192_0049	hypo	UP	conserved hypothetical protein	3.14339	0.175682	2.73334	hits only with bacteria
CL6447Contig1	Esi0384_0025	hypo	UP	conserved hypothetical protein	1.48705	-0.0202787	-0.499573	hits only with bacteria
CL7356Contig1	Esi0420_0009	oxi	UP	conserved hypothetical protein	-0.00219572	-0.8899	1.59016	hits only with bacteria
CL1427Contig1	Esi0024_0101	oxi, hypo	UP	conserved hypothetical protein	1.97256	1.48774	2.40454	hits with several species
CL2760Contig1	Esi0053_0025	hyper	UP	conserved hypothetical protein	-0.396019	1.23486	-0.0136032	hits with several species
CL1353Contig1	Esi0119_0044	hyper	UP	conserved hypothetical protein	0.0814541	1.84485	-0.195567	hits with several species
CL2424Contig1	Esi0176_0002	hypo	UP	conserved hypothetical protein	2.39823	1.10657	1.37092	hits with several species
LQ0AFA6YI13RM1.SCF	Esi0199_0043	oxi, hypo	UP	conserved hypothetical protein	3.50694	0.834342	2.434	hits with several species
CL3857Contig1	Esi0002_0246	hyper, hypo	UP	conserved hypothetical protein	3.04378	3.45674	0.39604	hits only with green lineage
CL1459Contig1	Esi0014_0125	hypo	UP	conserved hypothetical protein	1.83131	0.800858	1.36868	hits only with green lineage
LQ0AGA1YF12RM1.SCF	Esi0002_0018	hyper, hypo	UP	conserved hypothetical protein	3.66413	6.0738	3.42507	hits only with ostreococcus and chlamydomonas
CL7630Contig1	Esi0173_0014	hypo	UP	conserved hypothetical protein	1.57665	-0.0631933	1.38393	hits only with unicellular eukaryotes
LQ0AAB27YK04FM1.SCF	Esi0100_0095	hyper, hypo	UP	conserved hypothetical protein	1.26635	1.16597	0.519261	hits only with phaeodactylum and marine bacteria
CL2849Contig1	Esi0136_0065	hyper	UP	conserved hypothetical protein	-0.593468	2.02272	-1.29045	hits with several species
CL2531Contig1	Esi0017_0197	hypo	UP	conserved hypothetical protein	1.60883	-1.12282	1.02098	hits with several species
CL2423Contig1	Esi0088_0039	hypo	UP	conserved hypothetical protein	1.95972	0.743855	0.705328	hits with several species
LQ0AAB94YF15RM1.SCF	Esi0129_0046	hyper	UP	conserved hypothetical protein	-0.937792	3.68659	1.32471	hits with several species
LQ0AAB71YH03RM1.SCF	Esi0214_0021	hypo	UP	conserved hypothetical protein	6.8613	3.16259	0.0179108	hits with several species
CL4995Contig1	Esi0343_0032	hyper	UP	conserved hypothetical protein	-1.09338	1.32783	-1.86566	hits with several species
LQ0AAB75YI16FM1.SCF	Esi0431_0003	hypo	UP	conserved hypothetical protein	1.0947	-0.598733	0.23773	hits with several species
LQ0AAB45YD05FM1.SCF	Esi0175_0008	hypo	UP	conserved hypothetical protein	1.28714	0.0843654	0.526864	hits only with heterokonts and green lineage
CL5049Contig1	Esi0057_0106	hypo	UP	conserved hypothetical protein	2.12988	0.499479	-0.950117	hits only with heterokonts and ostreococcus
CL1747Contig1	Esi0366_0006	hypo	UP	conserved hypothetical protein	3.24285	-1.27389	2.55133	hits with several species
LQ0AAB22YH04FM1.SCF	Esi0345_0022	oxi, hyper	UP	conserved hypothetical protein	2.76008	2.87858	2.35203	hits with several species
LQ0ABA1YO18FM1.SCF	Esi0345_0022	oxi	UP	conserved hypothetical protein	2.10953	2.2723	2.94138	hits with several species
CL438Contig1	Esi0007_0082	hypo	UP	conserved hypothetical protein	2.8702	-0.0290008	0.854118	hits with several species
LQ0AAB74YN16FM1.SCF	Esi0007_0084	hypo	UP	conserved hypothetical protein	2.97713	-1.35368	0.724226	hits with several species
LQ0AAB78YO22RM1.SCF	Esi0007_0086	hypo	UP	conserved hypothetical protein	4.30854	1.8213	1.1972	hits with several species
LQ0AAA14YO08FM1.SCF	Esi0007_0087	hypo	UP	conserved hypothetical protein	3.5587	-0.969675	1.40297	hits with several species
LQ0AAB45YN19FM1.SCF	Esi0297_0004	hypo	DOWN	conserved hypothetical protein	-6.18641	-1.71169	-4.45853	hits only with diatoms sequences
LQ0AAB79YP18FM1.SCF	Esi0320_0026	hypo	DOWN	conserved hypothetical protein	-5.96117	0.228582	-2.12817	hits only with diatoms sequences
CL3029Contig1	Esi0019_0063	oxi	DOWN	conserved hypothetical protein	-4.57955	0.0431535	-1.53541	hits only with diatoms sequences
CL4697Contig1	Esi0098_0050	hypo	DOWN	conserved hypothetical protein	-2.98157	0.8721	-1.10713	hits only with diatoms sequences
LQ0AAB52YD12FM1.SCF	Esi0141_0033	oxi	DOWN	conserved hypothetical protein	-5.4368	-4.05464	-5.31732	hits only with dictyostelium discoideum
CL7724Contig1	Esi0152_0045	oxi	DOWN	conserved hypothetical protein	-6.535	-2.19522	-7.59458	hits only with heterokonts
CL4335Contig1	Esi0124_0046	oxi	DOWN	conserved hypothetical protein	-4.36736	-2.70544	-4.05956	hits only with thalassiosira
CL2951Contig1	Esi0383_0007	hyper	UP	conserved hypothetical protein	1.97543	2.17806	1.18539	hits with several species
CL3755Contig1	Esi0320_0027	hypo	UP	conserved hypothetical protein	3.11179	-1.2971	1.09868	hits only with phytophtora
LQ0AAB83YA04RM1.SCF	Esi0319_0026	hyper	UP	conserved hypothetical protein	-0.39201	2.10773	-0.438675	hits only with diatoms
CL3409Contig1	Esi0161_0007	oxi	UP	conserved hypothetical protein	-2.85517	-3.39811	2.3718	most hits dictyostelium discoideum
LQ0AAB90YJ21RM1.SCF	Esi0331_0008	hypo	UP	conserved hypothetical protein	1.23208	-1.51175	0.103734	most hits dictyostelium discoideum
CL982Contig1	Esi0002_0193	oxi, hypo	UP	conserved hypothetical protein	2.10794	1.20523	2.79856	mostly phytophtora
CL2657Contig1	Esi0046_0005	hyper	UP	conserved hypothetical protein	-1.88176	2.67909	-1.15081	only diatoms
CL4126Contig1	Esi0061_0046	hypo	UP	conserved hypothetical protein	1.12067	0.300935	0.611711	hits only with dictyostelium discoideum
CL2433Contig1	Esi0280_0040	hypo	UP	conserved hypothetical protein	1.10283	0.683759	0.422972	only dictyostelium discoideum
LQ0ACA3YL04RM1.SCF	Esi0403_0020	hyper	UP	conserved hypothetical protein	-0.0504953	2.9896	0.760443	most hits with phytophtora
CL4054Contig1	Esi0038_0107	hyper	UP	conserved hypothetical protein	-0.518024	1.74929	0.492264	hist only with phytophtora
CL4916Contig1	Esi0075_0084	oxi	UP	conserved hypothetical protein	-1.07971	-1.83269	1.23706	only phytophtora
LQ0AGA1YC03RM1.SCF	Esi0094_0043	hypo	UP	conserved hypothetical protein	2.04153	-1.29863	1.30407	only phytophtora
LQ0AAB32YK15FM1.SCF	Esi0143_0044	hypo	UP	conserved hypothetical protein	1.09832	-0.0664114	0.618645	only hits with heterokonts
LQ0AFA6YI19RM1.SCF	Esi0063_0064	hyper	UP	conserved hypothetical protein	-1.91291	1.84366	-0.682727	only hits with heterokonts
CL6340Contig1	Esi0348_0009	hyper	UP	conserved hypothetical protein	0.0964263	2.71939	0.122995	one hit only thalassiosira

## Sheet: genome equivalent unknown
sequence	genome eq.	significant in		annotated as	log2-ratio (hypo/control)	log2-ratio (hyper/control)	log2-ratio (oxi/control)	comments
CL1693Contig1	no gene model associated	hypo	DOWN	hypothetical protein	-2.00784	-0.54169	-1.11862
CL201Contig2	no gene model associated	hypo	DOWN	hypothetical protein	-2.84899	-1.02543	-1.41292
CL2358Contig1	no gene model associated	oxi, hypo	UP	hypothetical protein	2.38736	0.283728	1.88216
CL2872Contig2	no gene model associated	oxi	UP	hypothetical protein	0.47669	0.591546	1.37596
CL291Contig1	no gene model associated	hyper	DOWN	hypothetical protein	-0.551636	-2.75658	-0.518535
CL3706Contig1	no gene model associated	oxi, hypo	UP	hypothetical protein	1.63287	0.991312	1.65968
CL3708Contig1	no gene model associated	hypo	UP	hypothetical protein	3.29832	-0.632308	1.40034
CL3779Contig1	no gene model associated	hypo	DOWN	hypothetical protein	-4.9533	-2.04832	-3.03539
CL3845Contig1	no gene model associated	oxi	DOWN	hypothetical protein	-1.64258	-0.559486	-1.46139
CL3901Contig1	no gene model associated	hyper	UP	hypothetical protein	-0.170729	3.00578	1.92246
CL432Contig1	no gene model associated	hyper	UP	hypothetical protein	1.54456	2.003	2.23895
CL4684Contig1	no gene model associated	hypo	DOWN	hypothetical protein	-4.70746	0.642118	1.01927
CL4919Contig1	no gene model associated	oxi, hypo	UP	hypothetical protein	2.16247	1.80233	2.27763
CL5131Contig1	no gene model associated	hyper	UP	hypothetical protein	-0.409863	2.93324	-0.414337
CL531Contig1	no gene model associated	hypo	UP	hypothetical protein	1.98615	1.14046	2.16963
CL5324Contig1	no gene model associated	hyper	UP	hypothetical protein	-1.31998	1.26509	0.280211
CL534Contig1	no gene model associated	oxi	DOWN	hypothetical protein	-2.86256	0.107019	-1.93903
CL5511Contig1	no gene model associated	hypo	DOWN	hypothetical protein	-2.16845	0.0123844	-1.62405
CL5655Contig1	no gene model associated	hyper	UP	hypothetical protein	-5.05998	1.05935	-1.63342
CL5798Contig1	no gene model associated	hypo	DOWN	hypothetical protein	-2.99406	-0.546103	-0.455885
CL5900Contig1	no gene model associated	hypo	UP	hypothetical protein	2.27606	1.06816	4.53117
CL6449Contig1	no gene model associated	hypo	DOWN	hypothetical protein	-3.33558	-0.791487	-2.10191
CL6831Contig1	no gene model associated	hypo	UP	hypothetical protein	1.18591	0.308002	0.928143
CL7004Contig1	no gene model associated	oxi	DOWN	hypothetical protein	-2.23266	-1.90856	-3.18017
CL7571Contig1	no gene model associated	hyper	UP	hypothetical protein	-1.53052	4.00518	-1.10826
CL7618Contig1	no gene model associated	oxi, hyper, hypo	UP	hypothetical protein	3.6851	3.46922	3.31745
CL7750Contig1	no gene model associated	hypo	DOWN	hypothetical protein	-8.24651	-3.12978	-3.66273
CL796Contig1	no gene model associated	hypo	UP	hypothetical protein	3.60295	2.07056	3.21607
CL960Contig1	no gene model associated	hypo	UP	hypothetical protein	1.4208	0.889452	1.35832
LQ0AAA12YM04FM1.SCF	no gene model associated	hypo	UP	hypothetical protein	1.302	-0.0269074	0.152555
LQ0AAA2YC12RM1.SCF	no gene model associated	oxi	UP	hypothetical protein	-1.2232	-0.255427	1.23338
LQ0AAB100YC09RM1.SCF	no gene model associated	hyper	DOWN	hypothetical protein	-0.0997867	-1.24974	0.219084
LQ0AAB100YF06FM1.SCF	no gene model associated	oxi	UP	hypothetical protein	1.96179	-1.24671	1.82904
LQ0AAB101YH23RM1.SCF	no gene model associated	hyper	UP	hypothetical protein	-1.37095	1.49118	-1.61853
LQ0AAB14YL09FM1.SCF	no gene model associated	hypo	UP	hypothetical protein	1.57223	1.28623	0.491532
LQ0AAB14YN12FM1.SCF	no gene model associated	hypo	DOWN	hypothetical protein	-3.19121	-1.48514	-0.9292
LQ0AAB15YA21FM1.SCF	no gene model associated	oxi	UP	hypothetical protein	1.67918	0.828257	1.42186
LQ0AAB16YL20FM3.SCF	no gene model associated	oxi	DOWN	hypothetical protein	-1.63461	-1.17575	-1.90171
LQ0AAB17YG11FM1.SCF	no gene model associated	hypo	DOWN	hypothetical protein	-5.43761	-0.57419	-0.712482
LQ0AAB27YN18FM1.SCF	no gene model associated	hypo	UP	hypothetical protein	1.83428	0.997683	1.51646
LQ0AAB28YG01FM1.SCF	no gene model associated	hyper	DOWN	hypothetical protein	0.238432	-4.93677	-0.0149242
LQ0AAB42YE12FM1.SCF	no gene model associated	hypo	UP	hypothetical protein	1.43181	0.399251	0.768921
LQ0AAB51YP21RM1.SCF	no gene model associated	hypo	UP	hypothetical protein	1.34944	-0.0680026	1.23549
LQ0AAB52YC11RM1.SCF	no gene model associated	hyper	UP	hypothetical protein	-0.801366	2.15536	0.153151
LQ0AAB54YK12RM1.SCF	no gene model associated	oxi	UP	hypothetical protein	0.422749	1.17395	2.07937
LQ0AAB56YM13RM1.SCF	no gene model associated	oxi	DOWN	hypothetical protein	-2.63319	-0.134244	-2.5416
LQ0AAB57YE05RM1.SCF	no gene model associated	hypo	UP	hypothetical protein	1.44994	0.0644548	1.66758
LQ0AAB57YG06RM1.SCF	no gene model associated	hypo	DOWN	hypothetical protein	-1.76793	-1.70166	-0.692077
LQ0AAB59YD10RM1.SCF	no gene model associated	hypo	UP	hypothetical protein	5.96697	0.580649	0.269857
LQ0AAB60YK10FM1.SCF	no gene model associated	hypo	UP	hypothetical protein	3.11148	-0.706589	2.71324
LQ0AAB63YO03FM1.SCF	no gene model associated	hypo	DOWN	hypothetical protein	-2.08787	-1.28467	-1.95766
LQ0AAB64YE03RM1.SCF	no gene model associated	oxi	DOWN	hypothetical protein	-2.95294	-0.959626	-3.14624
LQ0AAB67YF05RM1.SCF	no gene model associated	hypo	UP	hypothetical protein	2.89615	0.415944	0.852853
LQ0AAB71YD10FM1.SCF	no gene model associated	hypo	DOWN	hypothetical protein	-5.56285	-0.368447	-1.86509
LQ0AAB72YO20RM1.SCF	no gene model associated	hypo	UP	hypothetical protein	2.0826	0.044201	1.28765
LQ0AAB74YN10RM1.SCF	no gene model associated	oxi	UP	hypothetical protein	2.3049	3.08442	2.78451
LQ0AAB74YO07RM1.SCF	no gene model associated	oxi	UP	hypothetical protein	1.66577	0.387217	1.30716
LQ0AAB77YJ08FM1.SCF	no gene model associated	hypo	UP	hypothetical protein	4.18904	-0.820948	2.27494
LQ0AAB7YB14FM1.SCF	no gene model associated	hyper	UP	hypothetical protein	0.918477	3.03134	0.270021
LQ0AAB81YH02RM1.SCF	no gene model associated	hypo	DOWN	hypothetical protein	-2.39457	-0.439958	-1.0745
LQ0AAB85YB07RM1.SCF	no gene model associated	hypo	UP	hypothetical protein	1.38744	-0.438442	0.825133
LQ0AAB87YN16RM1.SCF	no gene model associated	hypo	UP	hypothetical protein	4.02609	-1.29366	-1.12288
LQ0AAB91YE06RM1.SCF	no gene model associated	oxi	UP	hypothetical protein	2.37167	2.22787	2.54108
LQ0AAB96YK03RM1.SCF	no gene model associated	hypo	UP	hypothetical protein	2.15973	-0.20377	0.0608232
LQ0AAB99YB19RM1.SCF	no gene model associated	hyper	UP	hypothetical protein	-0.874634	1.89539	0.509216
LQ0ACA14YH11RM1.SCF	no gene model associated	oxi	UP	hypothetical protein	1.44939	-0.113944	1.91831
LQ0ACA23YB02RM1.SCF	no gene model associated	hypo	DOWN	hypothetical protein	-6.58956	-4.14099	-3.43775
LQ0ADA12YN22RM1.SCF	no gene model associated	hypo	DOWN	hypothetical protein	-3.63888	-2.24027	-2.89885
LQ0AEA1YD06FM1.SCF	no gene model associated	hypo	UP	hypothetical protein	2.4801	0.425039	1.03954
LQ0AEA5YO09RM1.SCF	no gene model associated	hypo	DOWN	hypothetical protein	-2.71123	-0.933385	-1.24018
LQ0AEA6YD10RM1.SCF	no gene model associated	hypo	UP	hypothetical protein	1.67456	0.216171	1.82851
LQ0AFA1YD23RM1.SCF	no gene model associated	hypo	UP	hypothetical protein	2.34414	-0.510758	0.623978
LQ0AFA1YJ01RM1.SCF	no gene model associated	hyper	DOWN	hypothetical protein	0.727613	-1.36776	0.107065
LQ0AFA5YD17RM1.SCF	no gene model associated	oxi, hypo	UP	hypothetical protein	7.18969	3.08439	5.48404
LQ0AFA8YF21RM1.SCF	no gene model associated	hypo	UP	hypothetical protein	1.14184	-0.220936	0.472695
LQ0AFA8YO21RM1.SCF	no gene model associated	hyper	UP	hypothetical protein	2.13581	3.00561	3.10376
CL1237Contig1	no gene model associated	oxi, hypo	UP	hypothetical protein	7.82212	4.5952	6.5764
LQ0AAB86YL21RM1.SCF	sctgs < 2kb	oxi	UP	hypothetical protein	2.37658	0.787914	1.39843
LQ0ACA24YB12RM1.SCF	no corresponding genome seq.	hyper	DOWN	hypothetical protein	-2.03813	-4.51254	-3.07563

## Sheet: AA metabolism
sequence	genome eq.	significant in		annotated as	log2-ratio (hypo/control)	log2-ratio (hyper/control)	log2-ratio (oxi/control)	comments
Methionine
CL257Contig1	Esi0175_0026	hypo	DOWN	S-Adenosyl-Methionine synthetase	-1.45936	-0.377393	-0.542384
leucine, isoleucine, valine (=branched chain aa)
LQ0AAB2YH21FM1.SCF	Esi0009_0201	hyper	DOWN	2-Isopropylmalate synthase	-3.99024	-5.41182	-1.73655
CL1050Contig1	Esi0020_0048	hypo	DOWN	2-Isopropylmalate synthase	-1.58128	-0.669661	-0.644088
CL3439Contig1	Esi0027_0145	hypo	DOWN	Dihydroxy-acid dehydratase	-8.02736	-2.22317	-0.591743
LQ0AAB58YB01RM1.SCF	Esi0358_0029	hyper	UP	Branched chain alpha-keto acid dehydrogenase E1 beta subunit (from a multi-enzyme complex)	3.7492	4.51368	1.27239
CL5443Contig1	Esi0358_0027	hypo	UP	Dihydrolipoamide branched chain transacylase (E2?)	2.90898	3.93191	1.60544
CL4512Contig1	Esi0322_0005	oxi, hypo	DOWN	Dihydrolipoamide dehydrogenase (E3?)	-4.7332	-0.580525	-2.22857
phenylalanine, tyrosine and tryptophan
LQ0AAB10YF11FM1.SCF	Esi0118_0024	hypo	DOWN	4-hydroxyphenylpyruvate dioxygenase	-7.24828	-0.478917	-2.78283	Third reaction in the catabolism of phenylalanine and tyrosine - the conversion of 4-hydroxyphenylpyruvate to homogentisate.
CL3265Contig1	Esi0003_0266	hyper	DOWN	Anthranilate phosphoribosyltransferase	-0.97853	-1.12151	-0.792037
CL5136Contig1	Esi0002_0121	hypo	DOWN	Chorismate Mutase	-1.85058	-0.631054	-1.04352
CL3888Contig1	Esi0076_0030	oxi	UP	Isochorismatase	3.17477	0.29002	3.14361	Part of a putative mycochelin biosyntheic pathway; This enzyme participates in the biosynthesis of siderophore group (nonribosomal)
CL7372Contig1	Esi0107_0059	hypo	DOWN	Indole-3-glycerol-phosphate synthase	-3.39247	0.333566	-1.66639
glutamine
CL3337Contig1	Esi0024_0138	oxi	DOWN	Amidophosphoribosyltransferase	-2.47779	0.731544	-1.16188
glutamate
CL1656Contig1	Esi0028_0164	hypo	DOWN	Glutamate dehydrogenase	-6.55203	-1.55736	-3.22194
CL2561Contig1	Esi0028_0164	oxi	DOWN	Glutamate dehydrogenase	-5.30975	-0.448964	-1.90858
CL4344Contig1	Esi0520_0002	hyper	UP	Glutamate dehydrogenase 2 (NADP-dependent)	-4.33469	1.6424	-0.734474
CL2593Contig1	Esi0188_0005	hyper	DOWN	Glutamate--ammonia ligase	-2.78408	-1.13148	-1.20778
Alanine
CL1607Contig1	Esi0008_0209	hyper, hypo	UP	Alanine aminotransferase	-3.83685	2.80912	-1.52879
Aspartate
CL2218Contig1	Esi0128_0020	hypo	DOWN	Aspartate Aminotransferase	-1.94531	-2.08761	-1.16518
CL5087Contig1	Esi0046_0125	hypo	DOWN	Aspartate carbamoyltransferase	-2.69314	-0.839682	-1.3779
CL7484Contig1	Esi0046_0125	hyper	DOWN	Aspartate carbamoyltransferase	-4.53498	-3.0245	-2.05675
Histidine
CL5373Contig1	Esi0022_0128	oxi, hypo	DOWN	ATP phosphoribosyltransferase	-4.68773	-1.782	-2.08374
CL4299Contig1	Esi0193_0026	hyper	DOWN	Histidinol-phosphate aminotransferase	-3.15973	-4.50264	0.40654	This enzyme participates in 5 metabolic pathways: histidine metabolism, tyrosine metabolism, phenylalanine metabolism, phenylalanine, tyrosine and tryptophan biosynthesis, and novobiocin biosynthesis. It employs one cofactor, pyridoxal phosphate.
Cysteine
LQ0AAA17YD12FM1.SCF	Esi0264_0028	hyper	UP	Cystathionine gamma-lyase	-1.94213	1.83888	-0.0931684
CL6160Contig1	Esi0008_0180	hyper	UP	Cysteine synthase	0.551372	1.04824	-0.0888572
CL314Contig1	Esi0646_0004	hypo	DOWN	Cysteine synthase	-1.36391	-0.129491	-0.573375
LQ0AAB29YI21FM1.SCF	Esi0344_0029	hypo	DOWN	Serine O-acetyltransferase	-3.68229	0.6466	-2.09803
Arginine/urea cycle
LQ0AAB28YG22FM1.SCF	Esi0073_0060	hypo	UP	Arginase	4.28812	2.00567	2.3051
LQ0ADA3YJ12RM1.SCF	Esi0081_0083	hypo	DOWN	Argininosuccinate lyase	-1.73566	-1.78624	0.0896232
CL2172Contig1	Esi0112_0076	hyper	DOWN	Arginosuccinate synthetase	-0.639574	-2.03902	-0.652966
LQ0ADA7YN01RM1.SCF	Esi0006_0183	hyper	DOWN	Carbamoyl-phosphate synthase	-3.43703	-1.8104	-1.50217
LQ0AAB75YL17RM1.SCF	Esi0030_0077	hypo	DOWN	N-carbamoylputrescine amidase	-5.81942	0.404849	-2.17247
CL594Contig1	Esi0361_0020	hypo	DOWN	Ornithine transcarbamoylase	-3.56305	-0.411899	-1.13111	In plants and microbes OTC is involved in arginine (Arg) biosynthesis, whereas in mammals it is located in the mitochondria and is part of the urea cycle
proline
CL7513Contig1	Esi0269_0011	hypo	UP	Proline dehydrogenase	6.42335	1.84913	1.40049
LQ0AAB7YL14FM1.SCF	Esi0045_0057	hypo	DOWN	Prolyl 4-hydroxylase	-5.45363	-0.634181	-3.32315
CL4774Contig1	Esi0048_0022	hypo	DOWN	Response regulator receiver domain protein	-2.26213	-1.3697	0.155799
lysine
CL5165Contig1	Esi0068_0067	hypo	DOWN	Homoaconitate hydratase	-1.52862	-0.736587	-0.831513
LQ0AAB3YE12FM1.SCF	Esi0500_0009	oxi	DOWN	Saccharopine dehydrogenase	-2.96539	-0.451085	-2.06693
serine
CL1513Contig1	Esi0109_0058	hypo	DOWN	Serine racemase	-3.63276	1.19973	-0.716104
general
CL5550Contig1	Esi0076_0062	hyper	UP	Copper amine oxidase	-1.8394	3.85651	-0.873564	This enzyme participates in 8 metabolic pathways: urea cycle and metabolism of amino groups, glycine, serine and threonine metabolism, histidine metabolism, tyrosine metabolism, phenylalanine metabolism, tryptophan metabolism, beta-alanine metabolism, and alkaloid biosynthesis II
CL7099Contig1	Esi0018_0111	hypo	DOWN	Homoserine dehydrogenase	-5.01659	-2.54694	-3.53882	This enzyme participates in glycine, serine and threonine metabolism and lysine biosynthesis.

## Sheet: DNAtoProtein
sequence	genome eq.	significant in		annotated as	log2-ratio (hypo/control)	log2-ratio (hyper/control)	log2-ratio (oxi/control)	comments
Purine synthesis
CL3333Contig1	Esi0031_0020	oxi	DOWN	5-aminoimidazole-4-carboxamide ribonucleotide formyltransferase/IMP cyclohydrolase	-3.53124	-0.615995	-2.512
Pyrimidine synthesis
CL6858Contig1	Esi0195_0022	hyper, hypo	DOWN	CTP synthase	-2.64119	-1.91434	-2.92872
CL3942Contig1	Esi0000_0145	hypo	DOWN	Dihydroorotate dehydrogenase	-5.08688	0.884861	-1.96658
Helicases
LQ0AAB65YE03RM1.SCF	Esi0298_0016	hypo	DOWN	DEAD box helicase	-2.79116	-1.24604	-1.36311
CL3987Contig1	Esi0254_0010	oxi	UP	DEAD box helicase	1.02572	0.0476869	2.1614
CL291Contig4	Esi0153_0071	hyper	DOWN	Putative helicase	-0.328629	-1.66706	-0.510216
LQ0AAB94YE10FM1.SCF	Esi0254_0018	hypo	UP	Regulator of chromosome condensation	5.77251	-0.995358	0.370827
Replication
LQ0AAB77YJ07RM1.SCF	Esi0073_0118	hypo	DOWN	DNA polymerase delta catalytic subunit	-1.31373	-1.35431	-1.04598
CL1906Contig1	Esi0113_0059	hypo	DOWN	DNA polymerase epsilon subunit 2	-4.79994	-3.27755	-5.16823
CL2446Contig1	Esi0041_0004	hypo	DOWN	DNA polymerase I (POL I)	-1.36856	-0.415646	-0.556076
LQ0AAB5YP09FM1.SCF	Esi0076_0101	oxi	DOWN	DNA-binding protein HU	-1.85932	-1.58402	-1.20507
LQ0AAB48YI12FM1.SCF	Esi0019_0003	oxi	DOWN	Minichromosome maintenance factor	-1.23176	-4.44077	-2.11569	Role in the early stages of chromosomal DNA replication
CL4172Contig1	Esi0517_0011	oxi	DOWN	Origin recognition complex	0.930117	-2.78669	-3.06307	The origin recognition complex (ORC) is a highly conserved six subunits protein complex essential for the initiation of the DNA replication in eukaryotic cells
LQ0AAB3YM05FM1.SCF	Esi0073_0064	hyper	DOWN	RAD51	-3.78323	-3.38687	-3.13555	DNA replication / repair
CL371Contig1	Esi0110_0067	hyper	UP	Ribonucleoside-diphosphate reductase	0.7454	2.21041	0.772876
LQ0ADA13YF18RM1.SCF	Esi0110_0067	hypo	UP	Ribonucleoside-diphosphate reductase	2.2905	2.42492	1.74094
CL6965Contig1	Esi0101_0096	hypo	DOWN	SMC2 (STRUCTURAL MAINTENANCE OF CHROMOSOMES 2)	-4.45754	0.455724	-3.01974
DNA repair
LQ0AAB17YG18FM1.SCF	Esi0057_0114	hypo	DOWN	ATPase domain-containing protein	-5.85122	-3.07666	-0.14629
CL1894Contig1	Esi0105_0023	oxi	UP	DNA excision repair protein ERCC-4	0.18169	1.10634	2.40108
CL6232Contig1	Esi0012_0176	oxi	DOWN	MutS	-2.945	-1.94111	-3.29639
CL3414Contig1	Esi0007_0136	hypo	DOWN	MutS protein homolog	-4.47456	-2.50027	-0.732535
CL2521Contig1	Esi0003_0098	hyper	DOWN	Proliferating cell nuclear antigen (PCNA)	-2.14251	-4.27575	-0.0689717	Protein that acts as a processivity factor for DNA polymerase delta in eukaryotic cells. DNA polymerase delta is involved in resynthesis of excised damaged DNA strands during DNA repair, PCNA is important for both DNA synthesis and DNA repair
LQ0ACA19YP10RM1.SCF	Esi0092_0054	hyper	UP	Polyprotein	-0.424558	1.23722	-0.536919
LQ0AAA7YG01FM1.SCF	Esi0057_0083	oxi	UP	Putative gag-pol polyprotein	2.72781	0.55375	5.22743
Transcription
LQ0AAB84YN02RM1.SCF	Esi0051_0089	hypo	UP	Conserved C2H2 zinc finger protein	1.8466	0.521388	1.49871	Gene transcription, translation, mRNA trafficking, cytoskeleton organisation, epithelial development, cell adhesion, protein folding, chromatin remodelling and zinc sensing.
CL6779Contig1	Esi0232_0045	oxi, hypo	DOWN	Endonuclease-reverse transcriptase	-3.82204	-0.571928	-3.37487
LQ0ADA10YI21RM1.SCF	Esi0232_0045	hypo	DOWN	Endonuclease-reverse transcriptase	-6.55471	-1.50814	-5.02682
CL6701Contig1	Esi0002_0151	hyper	UP	Histone acetyltransferase	1.88269	1.3052	1.90827	Acetylate conserved lysine amino acids on histone proteins by transferring an acetyl group from acetyl CoA to lysine to form ε-N-acetyl lysine
LQ0AAB50YB18FM1.SCF	Esi0163_0038	hyper	UP	Putative transcription factor	4.06467	7.24282	2.66014	Only in diatoms
CL2222Contig1	Esi0046_0065	hypo	DOWN	Transcription factor C-MYB	-3.43459	-0.860316	-1.15315
LQ0AAA7YL01FM1.SCF	Esi0018_0092	hypo	UP	Transcription initiation factor IIB	3.28995	-1.31991	0.978835
CL6894Contig1	Esi0149_0026	oxi	UP	Transducin family protein / WD-40 repeat family protein	1.1907	-0.018078	1.48239	Signal transcduction/transcription regulation
LQ0AAB103YF06FM1.SCF	Esi0149_0026	oxi	UP	Transducin family protein / WD-40 repeat family protein	1.34092	0.447239	2.97647	Signal transcduction/transcription regulation
RNA processing
LQ0AAB101YA13FM1.SCF	Esi0042_0051	hypo	UP	Similar to splicing factor	1.18001	-1.09135	0.67741
CL7487Contig1	Esi0218_0024	hyper	DOWN	RRNA processing protein	-1.87346	-3.80204	0.785237
LQ0AAB57YO02RM1.SCF	Esi0000_0165	hyper	DOWN	RRNA-processing protein FCF1 homolog	0.319847	-1.17992	-0.0613766
LQ0AAB65YO12RM1.SCF	Esi0026_0122	hyper	DOWN	Similar to RNA processing factor 1	0.0430431	-2.22283	0.356522
LQ0AAB2YL13FM1.SCF	Esi0010_0024	hypo	DOWN	Mitochondrial rna splicing protein	-4.43185	-0.128802	-2.68152
CL1542Contig1	Esi0007_0148	hypo	DOWN	mRNA binding protein	-3.8898	-1.14177	-2.53814
LQ0AAB87YP19FM1.SCF	Esi0022_0097	hypo	DOWN	Pentatricopeptide (PPR) repeat-containing protein	-5.26301	-2.22269	-4.42405	Chloroplast RNA processing protein
Translation
LQ0AAB49YP20FM1.SCF	Esi0008_0064	hypo	DOWN	Protein pelota homolog	-1.84321	-0.414431	0.802401
LQ0AAB57YF11FM1.SCF	Esi0031_0121	hypo	UP	EIF5B, eukaryotic translation initiation factor 5B	5.38962	-1.43084	-0.535965
CL1781Contig1	Esi0055_0035	hyper	DOWN	Fibrillarin	-0.379697	-1.34343	-0.493548	Component of a nucleolar small nuclear ribonucleoprotein (snRNP) particle thought to participate in the first step in processing preribosomal RNA.
CL4918Contig1	Esi0102_0080	hyper	DOWN	NUCLEOLAR PROTEIN NOP56	-1.83742	-2.62534	-0.541462	Related to fibrillarin
LQ0AFA4YK21RM1.SCF	Esi0018_0022	hyper	DOWN	Eukaryotic initiation factor	0.0612528	-1.36275	-0.456537
CL4162Contig1	Esi0119_0028	hyper, hypo	DOWN	Eukaryotic peptide chain release factor 1	-1.1446	-1.10923	-0.0543993
CL4977Contig1	Esi0366_0011	hyper	DOWN	Eukaryotic translation initiation factor eIF3 subunit l	-0.308469	-1.37423	-0.454583
LQ0AAB70YA04RM1.SCF	Esi0031_0117	hypo	DOWN	GTP binding / translation factor, nucleic acid binding	-1.6263	-0.927243	-0.547343
CL2104Contig1	Esi0100_0021	hypo	DOWN	Peptide chain release factor 3	-3.30688	-0.931286	-2.7512
CL6367Contig1	Esi0079_0023	oxi	DOWN	Plastid YchF-like GTPase	-6.60544	-1.25543	-2.46473	GTP-binding protein
LQ0AAB87YE21FM1.SCF	Esi0016_0160	hypo	UP	Poly(A) binding protein	3.50545	-1.24609	0.283836
CL4932Contig1	Esi0003_0263	hyper	DOWN	U3 small nucleolar ribonucleoprotein	-0.860666	-2.50103	-0.410627
CL6699Contig1	Esi0094_0058	oxi	DOWN	Translation initiation factor IF-1	-2.12557	-0.397816	-1.54407
LQ0AAB72YE02FM1.SCF	Esi0431_0004	hypo	DOWN	Topoisomerase-like protein	-4.0856	0.466925	-0.247815	Fixation to nucleic acid
Ribosomes
CL6289Contig1	Esi0049_0137	hypo	DOWN	50S ribosomal protein	-1.98432	-0.860324	-1.33185
CL725Contig1	Esi0049_0137	hypo	DOWN	50S ribosomal protein	-2.01592	-0.396419	-0.491423
CL582Contig1	Esi0149_0062	hypo	DOWN	Chloroplast 50S ribosomal protein	-2.95666	-0.568705	-1.0283
CL833Contig1	Esi0063_0061	hypo	DOWN	Ribosomal protein L17	-1.5792	-0.428488	-0.640635
CL310Contig1	Esi0164_0030	hypo	UP	Ribosomal protein L38	3.19612	0.356335	0.236632
CL84Contig2	Esi0212_0021	hypo	DOWN	Ribosomal protein S1	-2.18341	-0.486479	-0.564674
tRNA
CL5217Contig1	Esi0138_0058	hyper	DOWN	Glutamine--tRNA ligase	0.53427	-1.57244	0.617675
CL2817Contig1	Esi0283_0025	oxi	DOWN	Methionyl-tRNA synthetase,	-2.24147	-0.644765	-2.85317
CL5561Contig1	Esi0274_0019	oxi	DOWN	Proline--tRNA ligase	-3.11842	-2.35547	-1.95346
CL2779Contig1	Esi0287_0020	hypo	DOWN	Valine--tRNA ligase	-3.24367	-1.58672	-0.25794
LQ0AAB2YD23FM1.SCF	Esi0005_0190	hyper	DOWN	Tryptophan--tRNA ligase	-0.786767	-5.80965	0.167336
CL2712Contig1	Esi0339_0038	hypo	DOWN	Threonyl-tRNA synthetase	-2.40559	0.0613194	-0.693046
LQ0AAB32YL17FM1.SCF	Esi0016_0102	hypo	DOWN	RNA m5u methyltransferase	-3.0182	-1.3023	-1.88236
CL2535Contig1	Esi0085_0008	hypo	DOWN	RNA methyltransferase	-5.95906	-2.01116	-2.6725
LQ0AAA8YK16FM1.SCF	Esi0000_0300	hyper	DOWN	Protein arginine N-methyltransferase 2	0.388363	-4.61784	0.267572

## Sheet: autophagy + protein turnover
sequence	genome eq.	significant in		annotated as	log2-ratio (hypo/control)	log2-ratio (hyper/control)	log2-ratio (oxi/control)	comments
Autophagy
CL3621Contig1	Esi0367_0002	oxi, hyper	UP	AUTOPHAGY 9	2.18471	3.40531	2.44131
CL1096Contig1	Esi0488_0007	hyper, hypo	UP	Microtubial binding protein	1.86515	1.72117	2.45721	Autophagy related protein [Ath]
CL435Contig1	Esi0488_0007	oxi, hypo	UP	Microtubial binding protein	1.10889	1.28412	1.8199	Autophagy related protein [Ath]
Protein turnover
CL4328Contig1	Esi0058_0023	hyper	DOWN	CaaX prenyl protease	-2.19931	-1.98515	-0.473423	Metalloprotease
CL448Contig2	Esi0000_0650	hyper	UP	Carboxypeptidase	-0.813426	1.61662	0.524963	Posttranslational modification, protein turnover, chaperones
CL1713Contig1	Esi0091_0062	hypo	DOWN	FKBP-type peptidyl-prolyl cis-trans isomerase	-2.52951	-1.11764	-1.84429
CL1537Contig1	Esi0021_0174	hypo	DOWN	FKBP-type peptidyl-prolyl cis-trans isomerase 5	-3.12885	-2.02276	-1.45653
LQ0AAB33YM07FM1.SCF	Esi0199_0018	hyper	UP	Vacuolar processing enzyme	-0.52617	1.30297	0.785099
Protein turnover and ubiquitination in chloroplasts
CL586Contig1	Esi0068_0035	hypo	DOWN	Chloroplast clp protease P	-1.51138	0.0889876	-0.656834
CL4631Contig1	Esi0023_0071	hyper	UP	Polyubiquitin	0.578829	1.41034	1.50231
CL643Contig1	Esi0049_0010	hyper	DOWN	Ubiquitin-activating enzyme E1	0.440597	-1.10084	0.651677
LQ0AAB101YO09RM1.SCF	Esi0096_0018	hypo	UP	Ubiquitin conjugating enzyme 2	1.28987	1.04579	1.58128
CL2545Contig1	Esi0000_0354	hypo	UP	Ubiquitin conjugating enzyme	1.02537	0.328313	1.33433
LQ0AAB21YI13FM1.SCF	Esi0018_0041	hypo	DOWN	Ubiquitin fusion degradation protein	-4.54145	-1.95473	-1.04396
CL6204Contig1	Esi0073_0140	hyper	DOWN	Proteasome family protein	0.0158265	-2.26816	-0.522604
CL3097Contig1	Esi0526_0005	hyper	UP	Protease	-0.116939	1.24256	0.541864

## Sheet: CH metabolism
sequence	genome eq.	significant in		annotated as	log2-ratio (hypo/control)	log2-ratio (hyper/control)	log2-ratio (oxi/control)	comments
Glycolysis
CL2316Contig1	Esi0437_0016	oxi	DOWN	Phosphofructokinase, putative	-5.38085	-3.19733	-2.2748
LQ0AAB13YA01FM1.SCF	Esi0437_0013	hyper, hypo	DOWN	Phosphofructokinase	-4.1963	-4.47041	-2.08012
CL93Contig1	Esi0151_0005	oxi	DOWN	Phosphoglycerate kinase	-2.92141	0.521227	-2.39741
CL697Contig1	Esi0070_0078	hypo	UP	Phosphoglycerate kinase	2.03925	0.979918	1.6817
CL3289Contig1	Esi0052_0040	hyper	DOWN	Pyruvate kinase, chloroplastic	-1.63044	-2.33559	-1.05268
CL4333Contig1	Esi0013_0217	hypo	DOWN	Exo-1,3-beta-glucanase, GH5	-1.77098	1.11182	-1.2276
CL61Contig1	Esi0378_0004	hypo	DOWN	Triosephosphate isomerase + glyceraldehyde-3-phosphate dehydrogenase	-1.61069	0.0514104	-0.666402
TCA cycle
CL1061Contig1	Esi0069_0026	oxi, hypo	DOWN	3-isopropylmalate dehydratase	-2.59179	-0.512508	-1.05914
CL790Contig1	Esi0048_0101	hypo	DOWN	Isocitrate dehydrogenase	-7.01024	-6.30941	-1.973
CL6688Contig1	Esi0159_0006	hypo	UP	Isocitrate lyase	7.72531	5.12402	4.26607
CL4864Contig1	Esi0144_0004	hypo	DOWN	UTP--glucose-1-phosphate uridylyltransferase/UDPglucose pyrophosphorylase	-2.6137	0.0810808	-2.4273
CL5609Contig1	Esi0003_0144	hyper	UP	Xylulokinase homolog	-0.233752	2.01088	-0.339442	Converts D-xylulose and ATP to xylulose 5-phosphate and ADP
CL5961Contig1	Esi0136_0009	oxi, hypo	DOWN	Hydroxyacylglutathione hydrolase-like	-5.91046	0.50167	-3.16987	Glyoxylase II
LQ0AAB6YF04FM1.SCF	Esi0176_0045	hypo	DOWN	Beta-glucosidase	-5.24501	-0.466943	-2.65029
LQ0AAB7YL22FM1.SCF	Esi0036_0134	hypo	UP	Gluconolactonase	2.70356	1.83711	-0.764802	Pentose phosphate pathway, ascorbate and aldarate metabolism, and caprolactam degradation
CL7068Contig1	Esi0019_0004	hypo	DOWN	Formyltetrahydrofolate deformylase	-3.9932	-0.815786	-2.53546	Glyoxylate cycle
LQ0AAB31YE01FM1.SCF	Esi0149_0030	hyper, hypo	DOWN	Phosphoglucomutase/phosphomannomutase	-2.69523	-3.00959	-0.83722
Inositol, myo-inositol
LQ0ACA15YN02RM1.SCF	Esi0110_0059	hyper	UP	Myo-inositol 2-dehydrogenase	2.07115	2.74051	1.79785
CL5810Contig1	Esi0249_0030	oxi, hyper, hypo	DOWN	Myo-inositol 2-dehydrogenase	-2.04465	-1.54764	-1.26145
LQ0AAB97YE17RM1.SCF	Esi0279_0022	oxi	DOWN	Inositol-3-phosphate synthase	-5.55146	-0.0434953	-3.42278
Mannitol
CL200Contig2	Esi0017_0062	hypo	DOWN	Mannitol-1-phosphate dehydrogenase	-2.64435	0.0309984	-0.143079

## Sheet: light, photosynthesis, pigments
sequence	genome eq.	significant in		annotated as	log2-ratio (hypo/control)	log2-ratio (hyper/control)	log2-ratio (oxi/control)	comments
Light-harvesting chorophyll protein complex / antenna proteins
CL1Contig46	Esi0026_0020	oxi	DOWN	Chlorophyll binding protein	-5.86997	0.389445	-2.53324
LQ0AEA6YC07RM1.SCF	Esi0026_0020	hypo	DOWN	Chlorophyll binding protein	-2.39024	0.0135586	-1.09133
CL1Contig7	Esi0085_0043	hyper	UP	Chlorophyll binding protein	2.76657	3.23495	0.273621
CL71Contig1	Esi0199_0055	hypo	DOWN	Chlorophyll binding protein	-2.11562	0.0363246	-0.635388
CL154Contig1	Esi0278_0013	oxi	DOWN	Chlorophyll binding protein	-3.89233	0.372944	-2.37874
CL34Contig3	Esi0287_0008	hyper	UP	Chlorophyll binding protein	-0.5436	1.65882	0.247322
LQ0AEA6YH12RM1.SCF	Esi0458_0016	hypo	UP	Chlorophyll binding protein	1.28522	-1.73745	1.37153
CL1Contig43	Esi1177_0004	hypo	DOWN	Chlorophyll binding protein	-2.04762	0.302457	-0.626447
Assembly of the photosystem II
CL722Contig1	Esi0017_0103	hypo	DOWN	Photosystem II stability/assembly factor	-4.98497	-0.309055	-1.70444
CL7265Contig1	Esi0256_0036	hyper	UP	Low molecular mass early light-inducible protein HV60	-2.35629	1.19954	-2.3595	Probably involved in the integration of pigments into the mature pigment-protein complexes
CL12Contig1	Esi0155_0030	hypo	DOWN	Oxygen-evolving enhancer 1	-3.58564	-0.143628	-1.50792	Thioredoxins
Synthesis of chlorophyll
CL2966Contig1	Esi0019_0033	oxi	DOWN	Uroporphyrinogen decarboxylase	-5.13016	-0.884067	-2.14089
LQ0AAB22YF09FM1.SCF	Esi0019_0030	hypo	DOWN	Uroporphyrinogen decarboxylase (URO-D) (UPD)	-7.56841	-1.30642	-2.28121
CL1909Contig1	Esi0063_0029	hypo	DOWN	Magnesium chelatase subunit H, putative chloroplast precursor	-6.04808	1.00049	-3.33634
Light receptors
LQ0AAB16YB18FM3.SCF.LQ	Esi0223_0003	hypo	DOWN	Aureochrome 4	-4.98387	-0.767176	-1.63773	Light receptor / transcription factor
CL5437Contig1	Esi0203_0008	hypo	UP	Aureochrome 5	1.75257	0.124657	0.457186	Light receptor / transcription factor
Photosynthesis, e- transfer / transport
CL7727Contig1	Esi0053_0033	hypo	DOWN	Electron transfer flavoprotein	-3.12125	0.734768	-0.0109912
LQ0AAA23YA10FM1.SCF	Esi0018_0016	hyper	UP	Possible ferredoxin	-0.336173	2.15093	-0.152791
CL6357Contig1	Esi0085_0023	hypo	DOWN	Ferredoxin	-3.95843	-0.669154	-1.79235
LQ0AAB88YB03FM1.SCF	Esi0263_0017	hyper	UP	Rubredoxin	-3.35198	2.63156	-1.49077	Rubredoxin is a low molecular weight iron containing bacterial protein involved in electron transfer, sometimes replacing ferredoxin as an electron carrier
CL125Contig1	Esi0153_0052	oxi	DOWN	Cytochrome b6-f	-2.71103	-0.139057	-1.08887
LQ0AAB17YD20FM1.SCF	Esi0114_0053	hypo	DOWN	Thylakoid lumen 15.0 kDa protein	-4.57045	0.112976	-1.20364
Carbon fixation/calvin cycle
CL105Contig1	Esi0000_0466	hypo	DOWN	Phosphoribulokinase	-2.14031	-0.0898404	-0.963896	This enzyme participates in carbon fixation (Calvin cycle)
Carotenoid synthesis
CL2028Contig1	Esi0159_0057	oxi	DOWN	1-deoxy-D-xylulose 5-phosphate reductoisomerase	-2.98578	-0.196679	-1.19957	First step of isoprenoid synthesis
CL6156Contig1	Esi0159_0057	hypo	DOWN	1-deoxy-D-xylulose 5-phosphate reductoisomerase	-3.55517	-1.50502	-1.73114	First step of isoprenoid synthesis
LQ0AAA19YD22FM1.SCF	Esi0165_0046	oxi	DOWN	4-hydroxy-3-methylbut-2-enyl diphosphate reductase (HMB-PP reductase)	-3.72885	0.0632534	-1.29548	Isopentenyl diphosphate biosynthesis
CL2752Contig1	Esi0024_0038	oxi	DOWN	Carotene desaturase, zeta-carotene	-4.33178	0.384391	-1.92045
CL7041Contig1	Esi0264_0026	hyper	UP	Geranylgeranyl pyrophosphate synthase	1.28795	4.17594	2.03667
CL1917Contig1	Esi0063_0068	oxi	DOWN	Cytochrome P450	-5.09735	-0.555466	-1.64893	Xantophyll synthesis
CL3356Contig1	Esi0063_0068	hypo	DOWN	Cytochrome P450	-6.75943	-2.5118	-3.66539	Carotenoid hydroxylase
CL2214Contig1	Esi0053_0003	hyper	DOWN	Phytoene desaturase	-0.476296	-3.17281	-0.99893
CL3768Contig1	Esi0210_0018	hyper	UP	Zeta-carotene desaturase, putative	3.99622	6.71724	1.03771

## Sheet: FA metabolism
sequence	genome eq.	significant in		annotated as	log2-ratio (hypo/control)	log2-ratio (hyper/control)	log2-ratio (oxi/control)	comments
FA synthesis
CL6735Contig1	Esi0043_0063	hypo	DOWN	Malonyl-CoA:ACP transacylase	-4.70663	-1.28558	-1.88097
CL4049Contig1	Esi0069_0106	oxi	DOWN	Beta-ketoacyl-acyl-carrier-protein synthase I	-1.4645	-0.597767	-1.2676
LQ0AAB17YH02FM1.SCF	Esi0309_0028	oxi	DOWN	Beta-hydroxyacyl-ACP dehydratase	-4.64214	-1.18113	-2.24295
FA degradation
CL2080Contig1	Esi0091_0099	hyper	UP	Acetyl-CoA acetyltransferase	0.903958	2.3011	0.807351	Mevalonate pathway of isopentenyl diphosphate biosynthesis and/or beta-oxidation
CL475Contig1	Esi0051_0057	oxi, hypo	UP	Acetyl-CoA acetyltransferase	2.95572	1.65821	3.21457
CL864Contig1	Esi0182_0006	hypo	UP	Acyl-CoA dehydrogenase	3.60856	1.86877	2.53348
CL1997Contig1	Esi0223_0017	oxi	DOWN	Acyl-CoA dehydrogenase	-0.923724	0.945007	-2.14822
CL6338Contig1	Esi0030_0175	hyper	UP	Enoyl-CoA hydratase	-0.649671	3.93487	2.19059
CL1249Contig1	Esi0154_0047	hyper	UP	Hydroxyacyl-Coenzyme A dehydrogenase	-0.25283	1.64297	0.722061
Lipids, membrane and storage
CL748Contig1	Esi0114_0056	hyper	UP	Mono-or diacylglycerol acyltransferase type 2	0.366113	2.05955	-0.0260331
LQ0AAB96YH23RM1.SCF	Esi0056_0014	hypo	UP	Phosphatidate cytidylyltransferase	3.10267	1.17705	-0.8218	CDP-DAG synthase
CL7457Contig1	Esi0297_0041	hypo	UP	Phosphatidylserine synthase	3.94415	-0.526292	2.07265

## Sheet: transport
sequence	genome eq.	significant in		annotated as	log2-ratio (hypo/control)	log2-ratio (hyper/control)	log2-ratio (oxi/control)	comments
ABC transporters
LQ0AAA17YI13FM1.SCF	Esi0028_0144	hypo	DOWN	ABC transporter-like protein	-3.7834	-2.32071	-2.01111
CL1476Contig1	Esi0101_0083	hyper	UP	ABC transporter-like	-1.08995	3.18988	-0.305694
N and S transporters
LQ0ADA10YD07RM1.SCF	Esi0278_0032	oxi	DOWN	Putative nitrate transporter	-4.53837	-0.684566	-2.58261
CL116Contig2	Esi0278_0026	oxi, hyper	DOWN	Nitrate transporter	-2.82509	-4.53684	-4.93748
CL1086Contig1	Esi0072_0044	hypo	DOWN	Nitrite transporter	-2.31409	-1.17627	-1.23693
CL2765Contig1	Esi0526_0006	hypo	DOWN	Ammonium transporter	-7.14453	-4.9796	-4.47216
LQ0AAB50YD14FM1.SCF	Esi0005_0140	hypo	DOWN	Sulfate transporter	-7.17422	1.00371	-2.31603
Sugar and sugar phosphate transporters
LQ0AAA6YG07FM1.SCF	Esi0577_0010	hypo	UP	Golgi GDP-mannose transporter	1.9339	-1.14745	-0.204648
LQ0AAB50YG16FM1.SCF	Esi0054_0002	hypo	UP	Putative sugar transporter	1.37396	-1.36455	1.09331
CL4203Contig1	Esi0100_0031	hyper	UP	Triosephosphate translocator	-0.936196	2.26171	-1.7958
Ion transporters
CL1053Contig1	Esi0104_0045	hypo	DOWN	Sodium:solute symporte	-1.42481	-0.262622	-0.924441
CL4571Contig1	Esi0056_0103	hyper	UP	Fanconi anemia, complementation group L	-0.97405	2.42249	0.280223	Potassium transporter
LQ0AAB22YF23FM1.SCF	Esi0063_0099	hypo	DOWN	Na+/H+ antiporter family protein	-3.08281	-1.8563	-2.1095
CL3885Contig1	Esi0331_0012	hyper	UP	Magnesium transport protein	-0.71836	1.3723	-1.05933
LQ0ADA11YN10RM1.SCF	Esi0005_0095	hyper	DOWN	Zinc transporter ZIP	-4.72956	-7.53959	-6.86221
LQ0AAA17YJ01FM1.SCF	Esi0221_0040	hyper	DOWN	Zinc transporter domain protein	-1.87826	-2.55653	-1.97958
CL2171Contig1	Esi0183_0014	hypo	DOWN	Putative anion:sodium symporter	-4.2122	-1.04158	-2.18983
LQ0AAB47YN05FM1.SCF	Esi0087_0068	hypo	DOWN	Similar to kinesin-like protein and inositol 5-phosphatase (Straminopiles)	-7.50459	-1.74557	-0.971464
Mitochondrial exchange
CL5987Contig1	Esi0003_0178	hypo	UP	Mitochondrial ADP/ATP translocator	4.70255	0.896648	0.81278
CL7430Contig1	Esi0103_0060	hypo	UP	Mitochondrial carrier protein	1.87514	1.05577	1.89045
CL3095Contig1	Esi0019_0065	hypo	DOWN	Mitochondrial import inner membrane translocase	-2.60792	-1.25726	-1.58509
LQ0ADA11YH07RM1.SCF	Esi0047_0026	hypo	UP	Mitochondrial import inner membrane translocase	1.19181	-0.408542	0.615761
CL1681Contig1	Esi0109_0044	hypo	UP	Mitochondrial protein import machinery	1.55165	-1.05122	-0.157621
LQ0AAB96YE15RM1.SCF	Esi0187_0016	hypo	DOWN	Putative mitochondrial carrier protein PET8	-2.97314	-4.00286	-1.14697	S-adenosylmethionine carrier
LQ0AAB44YG05FM1.SCF	Esi0019_0103	hyper	DOWN	Solute carrier family	0.162904	-2.31903	1.08136
CL2219Contig1	Esi0000_0547	hypo	DOWN	Solute carrier family 25 (mitochondrial carrier, phosphate carrier)	-2.51001	-1.54367	-1.75165
CL5413Contig1	Esi0180_0050	hypo	DOWN	ADP-ATP translocase	-5.91347	-4.70725	-1.46433
LQ0AAB83YK01FM1.SCF	Esi0083_0053	hyper	DOWN	Solute carrier family 35	-0.375146	-2.00375	-0.407015
CL5718Contig1	Esi0066_0117	oxi	UP	Peroxisomal membrane protein 2	-1.79144	-2.82062	2.05592
CL148Contig1	Esi0010_0105	hypo	DOWN	Similarties to peroxisomal membrane 22 kDa family protein	-2.55876	0.231175	-1.40955
LQ0AAB64YD22FM1.SCF	Esi0129_0043	hyper	DOWN	Putative transporter	0.689301	-1.31267	0.142536

[truncated: 5 more sheets: cytoskeleton, trafficking, stress, ER-related, signaling, others, 100mostStable]
