# Supplementary material for: Global expression analysis of the brown alga Ectocarpus siliculosus (Phaeophyceae) reveals large-scale reprogramming of the transcriptome in response to abiotic stress
Source: Genome Biol. 2009 Jun 16;10(6):R66. doi: 10.1186/gb-2009-10-6-r66 (PMC2718500; doi:10.1186/gb-2009-10-6-r66)
Supplement: Additional data file 5 — The column FDR refers to the FDR that was applied when identifying the significantly regulated transcripts used for this analysis. [file gb-2009-10-6-r66-S5.xls]

## Sheet: HyperDown
FDR<	Function	GO-ID	in set	total	genes	p
0.1	3'-5' exonuclease activity	GO:0008408	17	61	CL4677CONTIG1, CL354CONTIG1, CL1708CONTIG1, LQ0ADA19YM19RM1.SCF, CL1380CONTIG1, CL1733CONTIG1, CL1766CONTIG1, CL3538CONTIG1, LQ0AAB9YJ01FM1.SCF, CL2601CONTIG1, LQ0AAB60YG01FM1.SCF, CL4455CONTIG1, CL3611CONTIG1, CL5489CONTIG1, CL1042CONTIG1, LQ0AAB92YO19FM1.SCF, LQ0AAB49YN17FM1.SCF,	0.001452
0.1	aminoacyl-tRNA ligase activity	GO:0004812	21	83	LQ0AAB2YD23FM1.SCF, CL5217CONTIG1, LQ0ADA22YH06RM1.SCF, CL3698CONTIG1, LQ0ACA13YP17RM1.SCF, CL5561CONTIG1, LQ0AAB82YF17FM1.SCF, CL1266CONTIG1, CL1173CONTIG1, CL2779CONTIG1, LQ0AAB104YE19FM1.SCF, CL1138CONTIG1, CL888CONTIG1, LQ0AAB14YL19FM1.SCF, CL497CONTIG1, LQ0AAB31YM13FM1.SCF, LQ0AAB36YO19FM1.SCF, CL2590CONTIG1, CL4061CONTIG1, CL7097CONTIG1, LQ0ACA8YN15RM1.SCF,	0.001653
0.05	aminoacyl-tRNA ligase activity	GO:0004812	16	83	LQ0AAB2YD23FM1.SCF, CL5217CONTIG1, LQ0ADA22YH06RM1.SCF, CL3698CONTIG1, LQ0ACA13YP17RM1.SCF, CL5561CONTIG1, LQ0AAB82YF17FM1.SCF, CL1266CONTIG1, CL1173CONTIG1, CL2779CONTIG1, LQ0AAB104YE19FM1.SCF, CL1138CONTIG1, CL888CONTIG1, LQ0AAB14YL19FM1.SCF, CL497CONTIG1, LQ0AAB31YM13FM1.SCF,	0.0002583
0.1	binding	GO:0005488	460	3216	CL2521CONTIG1, LQ0AAB2YD23FM1.SCF, CL6093CONTIG1, CL4932CONTIG1, CL4918CONTIG1, CL2172CONTIG1, CL7487CONTIG1, CL7484CONTIG1, CL5217CONTIG1, CL1967CONTIG1, CL1781CONTIG1, LQ0AAB44YG05FM1.SCF, CL949CONTIG1, CL3289CONTIG1, CL291CONTIG4, LQ0AAB47YC05FM1.SCF, CL3759CONTIG1, CL2219CONTIG1, CL3439CONTIG1, CL6226CONTIG1, CL1835CONTIG1, CL2477CONTIG1, CL5239CONTIG1, CL3436CONTIG1, CL3469CONTIG1, CL402CONT…	0.0005257
0.1	carbon-oxygen lyase activity	GO:0016835	23	95	CL3439CONTIG1, LQ0ADA3YJ12RM1.SCF, CL786CONTIG1, CL4677CONTIG1, CL5165CONTIG1, CL505CONTIG1, CL516CONTIG1, CL354CONTIG1, LQ0AAB37YB16FM1.SCF, CL1380CONTIG1, LQ0AAB102YB02FM1.SCF, CL3284CONTIG1, LQ0AAB17YH02FM1.SCF, CL6408CONTIG1, CL5627CONTIG1, CL6735CONTIG1, CL1851CONTIG1, LQ0AAB66YM16FM1.SCF, CL6108CONTIG1, CL3611CONTIG1, CL3649CONTIG1, CL6031CONTIG1, CL1931CONTIG1,	0.001915
0.1	CTP synthase activity	GO:0003883	4	5	CL6858CONTIG1, CL2172CONTIG1, CL3788CONTIG1, CL2727CONTIG1,	0.001265
0.05	CTP synthase activity	GO:0003883	4	5	CL6858CONTIG1, CL2172CONTIG1, CL3788CONTIG1, CL2727CONTIG1,	0.0001307
0.1	DNA replication origin binding	GO:0003688	15	38	CL886CONTIG1, CL1337CONTIG1, CL1906CONTIG1, CL1390CONTIG1, LQ0AAB44YF24FM1.SCF, CL7767CONTIG1, CL1035CONTIG1, CL6832CONTIG1, LQ0AAB28YG18FM1.SCF, LQ0AAB33YL18FM1.SCF, CL7117CONTIG1, CL7031CONTIG1, CL4955CONTIG1, CL4172CONTIG1, CL5662CONTIG1,	3.732e-05
0.1	dTDP-4-dehydrorhamnose reductase activity	GO:0008831	6	9	CL786CONTIG1, CL4677CONTIG1, CL354CONTIG1, CL1380CONTIG1, CL3611CONTIG1, CL1495CONTIG1,	0.0002786
0.1	exonuclease activity, active with either ribo- or deoxyribonucleic acids and producing 5'-phosphomonoesters	GO:0016796	17	61	CL4677CONTIG1, CL354CONTIG1, CL1708CONTIG1, LQ0ADA19YM19RM1.SCF, CL1380CONTIG1, CL1733CONTIG1, CL1766CONTIG1, CL3538CONTIG1, LQ0AAB9YJ01FM1.SCF, CL2601CONTIG1, LQ0AAB60YG01FM1.SCF, CL4455CONTIG1, CL3611CONTIG1, CL5489CONTIG1, LQ0AAB8YK16FM1.SCF, LQ0AAB92YO19FM1.SCF, LQ0AAB49YN17FM1.SCF,	0.001452
0.1	GDP-mannose 4,6-dehydratase activity	GO:0008446	5	8	CL4677CONTIG1, CL505CONTIG1, CL354CONTIG1, CL3611CONTIG1, CL1931CONTIG1,	0.001454
0.1	glutamate-tRNA ligase activity	GO:0004818	7	15	CL5217CONTIG1, LQ0ADA22YH06RM1.SCF, CL5561CONTIG1, LQ0AAB82YF17FM1.SCF, CL2779CONTIG1, LQ0AAB104YE19FM1.SCF, CL4061CONTIG1,	0.001512
0.05	glutamate-tRNA ligase activity	GO:0004818	6	15	CL5217CONTIG1, LQ0ADA22YH06RM1.SCF, CL5561CONTIG1, LQ0AAB82YF17FM1.SCF, CL2779CONTIG1, LQ0AAB104YE19FM1.SCF,	0.0004085
0.1	hydro-lyase activity	GO:0016836	21	80	CL3439CONTIG1, LQ0ADA3YJ12RM1.SCF, CL786CONTIG1, CL4677CONTIG1, CL5165CONTIG1, CL505CONTIG1, CL516CONTIG1, CL354CONTIG1, LQ0AAB37YB16FM1.SCF, CL1380CONTIG1, LQ0AAB102YB02FM1.SCF, LQ0AAB17YH02FM1.SCF, CL6408CONTIG1, CL5627CONTIG1, CL6735CONTIG1, CL1851CONTIG1, CL6108CONTIG1, CL3611CONTIG1, CL3649CONTIG1, CL6031CONTIG1, CL1931CONTIG1,	0.0009956
0.1	intramolecular oxidoreductase activity	GO:0016860	20	75	CL327CONTIG2, LQ0AAB97YC16FM1.SCF, CL2087CONTIG1, CL236CONTIG1, LQ0ADA3YJ12RM1.SCF, CL4677CONTIG1, CL505CONTIG1, CL166CONTIG1, CL516CONTIG1, CL4605CONTIG1, CL1942CONTIG1, CL897CONTIG1, CL1380CONTIG1, CL1691CONTIG1, CL6408CONTIG1, CL479CONTIG1, CL6127CONTIG1, CL6276CONTIG1, CL593CONTIG1, CL1495CONTIG1,	0.001054
0.05	intramolecular oxidoreductase activity	GO:0016860	14	75	CL327CONTIG2, LQ0AAB97YC16FM1.SCF, CL2087CONTIG1, CL236CONTIG1, LQ0ADA3YJ12RM1.SCF, CL4677CONTIG1, CL505CONTIG1, CL166CONTIG1, CL516CONTIG1, CL4605CONTIG1, CL1942CONTIG1, CL897CONTIG1, CL1380CONTIG1, CL1691CONTIG1,	0.0008697
0.1	intramolecular oxidoreductase activity, interconverting keto- and enol-groups	GO:0016862	9	23	LQ0AAB97YC16FM1.SCF, CL2087CONTIG1, CL236CONTIG1, CL4605CONTIG1, CL1942CONTIG1, CL897CONTIG1, CL479CONTIG1, CL6127CONTIG1, CL593CONTIG1,	0.001494
0.1	intramolecular oxidoreductase activity, transposing S-S bonds	GO:0016864	9	23	LQ0AAB97YC16FM1.SCF, CL2087CONTIG1, CL236CONTIG1, CL4605CONTIG1, CL1942CONTIG1, CL897CONTIG1, CL479CONTIG1, CL6127CONTIG1, CL593CONTIG1,	0.001494
0.1	isomerase activity	GO:0016853	49	221	CL327CONTIG2, LQ0AAB44YG05FM1.SCF, LQ0AAB97YC16FM1.SCF, LQ0AAB31YE01FM1.SCF, CL2087CONTIG1, CL402CONTIG1, CL236CONTIG1, LQ0ADA3YJ12RM1.SCF, CL786CONTIG1, CL1537CONTIG1, LQ0AFA3YJ15RM1.SCF, CL3251CONTIG1, CL131CONTIG1, LQ0AFA5YO20RM1.SCF, CL1201CONTIG1, CL4677CONTIG1, CL505CONTIG1, CL166CONTIG1, CL516CONTIG1, CL354CONTIG1, CL4605CONTIG1, CL1942CONTIG1, CL897CONTIG1, CL1380CONTIG1, LQ0AAB13YM14FM1.…	8.29e-05
0.1	ligase activity, forming aminoacyl-tRNA and related compounds	GO:0016876	21	83	LQ0AAB2YD23FM1.SCF, CL5217CONTIG1, LQ0ADA22YH06RM1.SCF, CL3698CONTIG1, LQ0ACA13YP17RM1.SCF, CL5561CONTIG1, LQ0AAB82YF17FM1.SCF, CL1266CONTIG1, CL1173CONTIG1, CL2779CONTIG1, LQ0AAB104YE19FM1.SCF, CL1138CONTIG1, CL888CONTIG1, LQ0AAB14YL19FM1.SCF, CL497CONTIG1, LQ0AAB31YM13FM1.SCF, LQ0AAB36YO19FM1.SCF, CL2590CONTIG1, CL4061CONTIG1, CL7097CONTIG1, LQ0ACA8YN15RM1.SCF,	0.001653
0.05	ligase activity, forming aminoacyl-tRNA and related compounds	GO:0016876	16	83	LQ0AAB2YD23FM1.SCF, CL5217CONTIG1, LQ0ADA22YH06RM1.SCF, CL3698CONTIG1, LQ0ACA13YP17RM1.SCF, CL5561CONTIG1, LQ0AAB82YF17FM1.SCF, CL1266CONTIG1, CL1173CONTIG1, CL2779CONTIG1, LQ0AAB104YE19FM1.SCF, CL1138CONTIG1, CL888CONTIG1, LQ0AAB14YL19FM1.SCF, CL497CONTIG1, LQ0AAB31YM13FM1.SCF,	0.0002583
0.1	ligase activity, forming carbon-oxygen bonds	GO:0016875	21	83	LQ0AAB2YD23FM1.SCF, CL5217CONTIG1, LQ0ADA22YH06RM1.SCF, CL3698CONTIG1, LQ0ACA13YP17RM1.SCF, CL5561CONTIG1, LQ0AAB82YF17FM1.SCF, CL1266CONTIG1, CL1173CONTIG1, CL2779CONTIG1, LQ0AAB104YE19FM1.SCF, CL1138CONTIG1, CL888CONTIG1, LQ0AAB14YL19FM1.SCF, CL497CONTIG1, LQ0AAB31YM13FM1.SCF, LQ0AAB36YO19FM1.SCF, CL2590CONTIG1, CL4061CONTIG1, CL7097CONTIG1, LQ0ACA8YN15RM1.SCF,	0.001653
0.05	ligase activity, forming carbon-oxygen bonds	GO:0016875	16	83	LQ0AAB2YD23FM1.SCF, CL5217CONTIG1, LQ0ADA22YH06RM1.SCF, CL3698CONTIG1, LQ0ACA13YP17RM1.SCF, CL5561CONTIG1, LQ0AAB82YF17FM1.SCF, CL1266CONTIG1, CL1173CONTIG1, CL2779CONTIG1, LQ0AAB104YE19FM1.SCF, CL1138CONTIG1, CL888CONTIG1, LQ0AAB14YL19FM1.SCF, CL497CONTIG1, LQ0AAB31YM13FM1.SCF,	0.0002583
0.1	mRNA 3'-UTR binding	GO:0003730	16	57	CL1833CONTIG1, CL1797CONTIG1, CL886CONTIG1, CL1337CONTIG1, CL1390CONTIG1, CL2947CONTIG1, CL442CONTIG1, CL1354CONTIG1, CL1732CONTIG1, CL4154CONTIG1, CL6832CONTIG1, LQ0AAB72YO08FM1.SCF, CL160CONTIG1, CL7031CONTIG1, CL2206CONTIG1, CL5776CONTIG1,	0.001828
0.1	mRNA binding	GO:0003729	45	180	CL4932CONTIG1, CL4918CONTIG1, CL1781CONTIG1, CL291CONTIG4, CL3436CONTIG1, CL1833CONTIG1, CL1266CONTIG1, CL1797CONTIG1, CL886CONTIG1, CL1337CONTIG1, CL249CONTIG1, CL6552CONTIG1, CL1390CONTIG1, LQ0AAB65YO12FM1.SCF, LQ0AAB14YL19FM1.SCF, CL3311CONTIG1, CL84CONTIG2, CL1766CONTIG1, CL2947CONTIG1, CL146CONTIG1, CL3538CONTIG1, CL442CONTIG1, LQ0AAB28YJ12FM1.SCF, CL1354CONTIG1, CL1732CONTIG1, LQ0AAB29YH01F…	6.768e-06
0.05	mRNA binding	GO:0003729	25	180	CL4932CONTIG1, CL4918CONTIG1, CL1781CONTIG1, CL291CONTIG4, CL3436CONTIG1, CL1833CONTIG1, CL1266CONTIG1, CL1797CONTIG1, CL886CONTIG1, CL1337CONTIG1, CL249CONTIG1, CL6552CONTIG1, CL1390CONTIG1, LQ0AAB65YO12FM1.SCF, LQ0AAB14YL19FM1.SCF, CL3311CONTIG1, CL84CONTIG2, CL1766CONTIG1, CL2947CONTIG1, CL146CONTIG1, CL3538CONTIG1, CL442CONTIG1, LQ0AAB28YJ12FM1.SCF, CL1354CONTIG1, CL1732CONTIG1,	0.001206
0.1	nucleic acid binding	GO:0003676	204	1246	CL2521CONTIG1, CL4932CONTIG1, CL4918CONTIG1, CL7487CONTIG1, CL1781CONTIG1, LQ0AAB44YG05FM1.SCF, CL949CONTIG1, CL291CONTIG4, CL2219CONTIG1, CL3439CONTIG1, CL6226CONTIG1, CL1835CONTIG1, CL5239CONTIG1, CL3436CONTIG1, CL1440CONTIG1, CL574CONTIG1, CL4890CONTIG1, LQ0AAB88YP04FM1.SCF, CL4358CONTIG1, CL51CONTIG1, LQ0AFA3YJ15RM1.SCF, CL1833CONTIG1, CL3225CONTIG1, CL1266CONTIG1, CL7281CONTIG1, CL2400CONTIG…	5.383e-05
0.1	nucleotide binding	GO:0000166	162	980	LQ0AAB2YD23FM1.SCF, CL6093CONTIG1, CL2172CONTIG1, CL5217CONTIG1, CL1967CONTIG1, LQ0AAB44YG05FM1.SCF, CL291CONTIG4, CL1835CONTIG1, CL5239CONTIG1, CL3436CONTIG1, LQ0ADA22YH06RM1.SCF, CL1467CONTIG1, LQ0AAB7YO18FM1.SCF, LQ0AAB58YC11FM1.SCF, CL4110CONTIG1, CL1301CONTIG1, CL4890CONTIG1, CL7576CONTIG1, CL772CONTIG1, CL3698CONTIG1, LQ0AAB42YN05FM1.SCF, LQ0AFA3YJ15RM1.SCF, CL5561CONTIG1, LQ0AAB82YF17FM1.S…	0.0002533
0.1	protein disulfide isomerase activity	GO:0003756	9	23	LQ0AAB97YC16FM1.SCF, CL2087CONTIG1, CL236CONTIG1, CL4605CONTIG1, CL1942CONTIG1, CL897CONTIG1, CL479CONTIG1, CL6127CONTIG1, CL593CONTIG1,	0.001494
0.1	purine nucleotide binding	GO:0017076	153	905	LQ0AAB2YD23FM1.SCF, CL6093CONTIG1, CL2172CONTIG1, CL5217CONTIG1, CL1967CONTIG1, LQ0AAB44YG05FM1.SCF, CL291CONTIG4, CL1835CONTIG1, CL5239CONTIG1, CL3436CONTIG1, LQ0ADA22YH06RM1.SCF, CL1467CONTIG1, LQ0AAB7YO18FM1.SCF, LQ0AAB58YC11FM1.SCF, CL4110CONTIG1, CL1301CONTIG1, CL4890CONTIG1, CL7576CONTIG1, CL772CONTIG1, CL3698CONTIG1, LQ0AAB42YN05FM1.SCF, LQ0AFA3YJ15RM1.SCF, CL5561CONTIG1, LQ0AAB82YF17FM1.S…	0.0001279
0.1	purine ribonucleotide binding	GO:0032555	149	874	LQ0AAB2YD23FM1.SCF, CL6093CONTIG1, CL2172CONTIG1, CL5217CONTIG1, CL1967CONTIG1, LQ0AAB44YG05FM1.SCF, CL291CONTIG4, CL1835CONTIG1, CL5239CONTIG1, CL3436CONTIG1, LQ0ADA22YH06RM1.SCF, CL1467CONTIG1, LQ0AAB7YO18FM1.SCF, LQ0AAB58YC11FM1.SCF, CL4110CONTIG1, CL1301CONTIG1, CL4890CONTIG1, CL7576CONTIG1, CL772CONTIG1, CL3698CONTIG1, LQ0AAB42YN05FM1.SCF, LQ0AFA3YJ15RM1.SCF, CL5561CONTIG1, LQ0AAB82YF17FM1.S…	0.0001049
0.1	ribonucleotide binding	GO:0032553	149	874	LQ0AAB2YD23FM1.SCF, CL6093CONTIG1, CL2172CONTIG1, CL5217CONTIG1, CL1967CONTIG1, LQ0AAB44YG05FM1.SCF, CL291CONTIG4, CL1835CONTIG1, CL5239CONTIG1, CL3436CONTIG1, LQ0ADA22YH06RM1.SCF, CL1467CONTIG1, LQ0AAB7YO18FM1.SCF, LQ0AAB58YC11FM1.SCF, CL4110CONTIG1, CL1301CONTIG1, CL4890CONTIG1, CL7576CONTIG1, CL772CONTIG1, CL3698CONTIG1, LQ0AAB42YN05FM1.SCF, LQ0AFA3YJ15RM1.SCF, CL5561CONTIG1, LQ0AAB82YF17FM1.S…	0.0001049
0.1	RNA 7-methylguanosine cap binding	GO:0000340	4	5	LQ0AAB33YK17FM1.SCF, LQ0AAB68YG24RM1.SCF, CL5747CONTIG1, CL6746CONTIG1,	0.001265
0.1	RNA binding	GO:0003723	93	484	CL4932CONTIG1, CL4918CONTIG1, CL7487CONTIG1, CL1781CONTIG1, CL949CONTIG1, CL291CONTIG4, CL3439CONTIG1, CL6226CONTIG1, CL3436CONTIG1, CL574CONTIG1, LQ0AAB88YP04FM1.SCF, CL51CONTIG1, CL1833CONTIG1, CL1266CONTIG1, CL7281CONTIG1, CL2400CONTIG1, CL1797CONTIG1, LQ0AAB17YM20FM1.SCF, CL886CONTIG1, CL1337CONTIG1, CL249CONTIG1, LQ0AAB33YK17FM1.SCF, LQ0AAB32YL23FM1.SCF, CL3064CONTIG1, LQ0AAB17YG22FM1.SCF, C…	3.332e-05
0.05	RNA binding	GO:0003723	55	484	CL4932CONTIG1, CL4918CONTIG1, CL7487CONTIG1, CL1781CONTIG1, CL949CONTIG1, CL291CONTIG4, CL3439CONTIG1, CL6226CONTIG1, CL3436CONTIG1, CL574CONTIG1, LQ0AAB88YP04FM1.SCF, CL51CONTIG1, CL1833CONTIG1, CL1266CONTIG1, CL7281CONTIG1, CL2400CONTIG1, CL1797CONTIG1, LQ0AAB17YM20FM1.SCF, CL886CONTIG1, CL1337CONTIG1, CL249CONTIG1, LQ0AAB33YK17FM1.SCF, LQ0AAB32YL23FM1.SCF, CL3064CONTIG1, LQ0AAB17YG22FM1.SCF, C…	0.0004543
0.1	RNA cap binding	GO:0000339	24	76	CL291CONTIG4, CL3436CONTIG1, CL1797CONTIG1, CL886CONTIG1, CL249CONTIG1, LQ0AAB33YK17FM1.SCF, CL6552CONTIG1, CL1390CONTIG1, LQ0AAB68YG24RM1.SCF, CL2947CONTIG1, CL146CONTIG1, CL5747CONTIG1, CL1354CONTIG1, CL6832CONTIG1, CL3549CONTIG1, LQ0AAB33YL18FM1.SCF, CL6746CONTIG1, LQ0AAA6YM05FM1.SCF, LQ0AAB72YO08FM1.SCF, LQ0AFA2YG08RM1.SCF, CL160CONTIG1, CL7031CONTIG1, CL5776CONTIG1, CL6898CONTIG1,	1.777e-05
0.1	RNA splicing factor activity, transesterification mechanism	GO:0031202	33	149	CL4918CONTIG1, CL7487CONTIG1, CL291CONTIG4, CL3436CONTIG1, CL1833CONTIG1, CL1797CONTIG1, CL886CONTIG1, CL1337CONTIG1, CL249CONTIG1, CL6552CONTIG1, CL1390CONTIG1, CL4103CONTIG1, CL3311CONTIG1, CL84CONTIG2, CL2947CONTIG1, CL587CONTIG1, CL442CONTIG1, CL1354CONTIG1, CL1732CONTIG1, LQ0AAB29YH01FM1.SCF, CL4154CONTIG1, CL1292CONTIG1, CL6832CONTIG1, LQ0AAB33YL18FM1.SCF, LQ0AAA6YM05FM1.SCF, CL4980CONTIG1,…	0.001201
0.1	rRNA binding	GO:0019843	28	89	CL4932CONTIG1, CL7487CONTIG1, CL6226CONTIG1, CL574CONTIG1, LQ0AAB88YP04FM1.SCF, CL51CONTIG1, CL886CONTIG1, CL1337CONTIG1, CL3064CONTIG1, CL3511CONTIG1, CL4243CONTIG1, CL1390CONTIG1, LQ0AAB65YO12FM1.SCF, LQ0AAB77YE06FM1.SCF, CL84CONTIG2, LQ0AAB35YH01FM1.SCF, LQ0AAB81YA06FM1.SCF, CL1950CONTIG1, CL3754CONTIG1, CL1354CONTIG1, CL3636CONTIG1, CL1292CONTIG1, CL6832CONTIG1, CL788CONTIG1, LQ0AAB72YO08FM1.…	3.898e-06
0.05	rRNA binding	GO:0019843	20	89	CL4932CONTIG1, CL7487CONTIG1, CL6226CONTIG1, CL574CONTIG1, LQ0AAB88YP04FM1.SCF, CL51CONTIG1, CL886CONTIG1, CL1337CONTIG1, CL3064CONTIG1, CL3511CONTIG1, CL4243CONTIG1, CL1390CONTIG1, LQ0AAB65YO12FM1.SCF, LQ0AAB77YE06FM1.SCF, CL84CONTIG2, LQ0AAB35YH01FM1.SCF, LQ0AAB81YA06FM1.SCF, CL1950CONTIG1, CL3754CONTIG1, CL1354CONTIG1,	4.036e-06
0.1	rRNA primary transcript binding	GO:0042134	14	42	CL4932CONTIG1, CL7487CONTIG1, CL886CONTIG1, CL1337CONTIG1, CL1390CONTIG1, LQ0AAB65YO12FM1.SCF, CL84CONTIG2, LQ0AAB35YH01FM1.SCF, CL1354CONTIG1, CL1292CONTIG1, CL6832CONTIG1, LQ0AAB72YO08FM1.SCF, CL160CONTIG1, CL7031CONTIG1,	0.0005412
0.1	snoRNA binding	GO:0030515	20	61	CL4918CONTIG1, CL7487CONTIG1, CL1781CONTIG1, CL886CONTIG1, CL1337CONTIG1, LQ0AAB32YL23FM1.SCF, CL1390CONTIG1, CL3311CONTIG1, CL84CONTIG2, LQ0AAB35YH01FM1.SCF, CL2947CONTIG1, CL442CONTIG1, CL1354CONTIG1, CL1292CONTIG1, CL6832CONTIG1, LQ0AAB72YO08FM1.SCF, CL160CONTIG1, CL7031CONTIG1, CL3859CONTIG1, CL2206CONTIG1,	4.845e-05
0.05	snoRNA binding	GO:0030515	13	61	CL4918CONTIG1, CL7487CONTIG1, CL1781CONTIG1, CL886CONTIG1, CL1337CONTIG1, LQ0AAB32YL23FM1.SCF, CL1390CONTIG1, CL3311CONTIG1, CL84CONTIG2, LQ0AAB35YH01FM1.SCF, CL2947CONTIG1, CL442CONTIG1, CL1354CONTIG1,	0.0003499
0.1	snRNA binding	GO:0017069	15	46	CL1833CONTIG1, CL886CONTIG1, CL1337CONTIG1, CL1390CONTIG1, CL2947CONTIG1, CL587CONTIG1, CL442CONTIG1, CL1354CONTIG1, CL1732CONTIG1, LQ0AAB29YH01FM1.SCF, CL4154CONTIG1, CL6832CONTIG1, CL4980CONTIG1, LQ0AAB72YO08FM1.SCF, CL160CONTIG1,	0.0004518
0.1	translation elongation factor activity	GO:0003746	15	44	CL1835CONTIG1, CL4306CONTIG1, LQ0AAB34YL02FM1.SCF, CL226CONTIG2, CL426CONTIG1, LQ0AAB40YI11FM1.SCF, CL3974CONTIG1, CL226CONTIG1, CL2104CONTIG1, LQ0AAB28YC09FM1.SCF, CL552CONTIG1, CL1264CONTIG1, LQ0AAB36YO19FM1.SCF, LQ0AAB80YM08FM1.SCF, LQ0AAA12YL23FM1.SCF,	0.0002608
0.05	translation elongation factor activity	GO:0003746	10	44	CL1835CONTIG1, CL4306CONTIG1, LQ0AAB34YL02FM1.SCF, CL226CONTIG2, CL426CONTIG1, LQ0AAB40YI11FM1.SCF, CL3974CONTIG1, CL226CONTIG1, CL2104CONTIG1, LQ0AAB28YC09FM1.SCF,	0.0009857
0.1	translation factor activity, nucleic acid binding	GO:0008135	50	200	CL291CONTIG4, CL1835CONTIG1, CL5239CONTIG1, CL1797CONTIG1, CL886CONTIG1, CL6765CONTIG1, LQ0AAB33YK17FM1.SCF, CL7544CONTIG1, CL4306CONTIG1, LQ0AAB34YL02FM1.SCF, CL3314CONTIG1, CL226CONTIG2, CL368CONTIG1, CL426CONTIG1, CL1390CONTIG1, LQ0AAB68YG24RM1.SCF, CL6201CONTIG1, CL2569CONTIG1, LQ0AAB40YI11FM1.SCF, CL706CONTIG1, CL3974CONTIG1, CL226CONTIG1, CL5509CONTIG1, CL2947CONTIG1, CL2104CONTIG1, CL4287C…	2.072e-06
0.05	translation factor activity, nucleic acid binding	GO:0008135	33	200	CL291CONTIG4, CL1835CONTIG1, CL5239CONTIG1, CL1797CONTIG1, CL886CONTIG1, CL6765CONTIG1, LQ0AAB33YK17FM1.SCF, CL7544CONTIG1, CL4306CONTIG1, LQ0AAB34YL02FM1.SCF, CL3314CONTIG1, CL226CONTIG2, CL368CONTIG1, CL426CONTIG1, CL1390CONTIG1, LQ0AAB68YG24RM1.SCF, CL6201CONTIG1, CL2569CONTIG1, LQ0AAB40YI11FM1.SCF, CL706CONTIG1, CL3974CONTIG1, CL226CONTIG1, CL5509CONTIG1, CL2947CONTIG1, CL2104CONTIG1, CL4287C…	5.838e-06
0.1	translation initiation factor activity	GO:0003743	28	125	CL291CONTIG4, CL1835CONTIG1, CL5239CONTIG1, CL1797CONTIG1, CL6765CONTIG1, LQ0AAB33YK17FM1.SCF, CL7544CONTIG1, CL3314CONTIG1, CL368CONTIG1, LQ0AAB68YG24RM1.SCF, CL6201CONTIG1, CL2569CONTIG1, CL706CONTIG1, CL3974CONTIG1, CL5509CONTIG1, CL2947CONTIG1, CL146CONTIG1, CL5747CONTIG1, CL442CONTIG1, LQ0AAB28YC09FM1.SCF, LQ0AAB28YJ12FM1.SCF, CL3549CONTIG1, LQ0AAB33YL18FM1.SCF, CL6746CONTIG1, LQ0AFA2YG08RM1…	0.002306
0.05	translation initiation factor activity	GO:0003743	21	125	CL291CONTIG4, CL1835CONTIG1, CL5239CONTIG1, CL1797CONTIG1, CL6765CONTIG1, LQ0AAB33YK17FM1.SCF, CL7544CONTIG1, CL3314CONTIG1, CL368CONTIG1, LQ0AAB68YG24RM1.SCF, CL6201CONTIG1, CL2569CONTIG1, CL706CONTIG1, CL3974CONTIG1, CL5509CONTIG1, CL2947CONTIG1, CL146CONTIG1, CL5747CONTIG1, CL442CONTIG1, LQ0AAB28YC09FM1.SCF, LQ0AAB28YJ12FM1.SCF,	0.0002307
0.1	translation regulator activity	GO:0045182	50	200	CL291CONTIG4, CL1835CONTIG1, CL5239CONTIG1, CL1797CONTIG1, CL886CONTIG1, CL6765CONTIG1, LQ0AAB33YK17FM1.SCF, CL7544CONTIG1, CL4306CONTIG1, LQ0AAB34YL02FM1.SCF, CL3314CONTIG1, CL226CONTIG2, CL368CONTIG1, CL426CONTIG1, CL1390CONTIG1, LQ0AAB68YG24RM1.SCF, CL6201CONTIG1, CL2569CONTIG1, LQ0AAB40YI11FM1.SCF, CL706CONTIG1, CL3974CONTIG1, CL226CONTIG1, CL5509CONTIG1, CL2947CONTIG1, CL2104CONTIG1, CL4287C…	2.072e-06
0.05	translation regulator activity	GO:0045182	33	200	CL291CONTIG4, CL1835CONTIG1, CL5239CONTIG1, CL1797CONTIG1, CL886CONTIG1, CL6765CONTIG1, LQ0AAB33YK17FM1.SCF, CL7544CONTIG1, CL4306CONTIG1, LQ0AAB34YL02FM1.SCF, CL3314CONTIG1, CL226CONTIG2, CL368CONTIG1, CL426CONTIG1, CL1390CONTIG1, LQ0AAB68YG24RM1.SCF, CL6201CONTIG1, CL2569CONTIG1, LQ0AAB40YI11FM1.SCF, CL706CONTIG1, CL3974CONTIG1, CL226CONTIG1, CL5509CONTIG1, CL2947CONTIG1, CL2104CONTIG1, CL4287C…	5.838e-06
0.1	UDP-glucuronate decarboxylase activity	GO:0048040	6	11	CL786CONTIG1, CL4677CONTIG1, CL505CONTIG1, CL354CONTIG1, CL1380CONTIG1, CL3611CONTIG1,	0.001215
0.05	UDP-glucuronate decarboxylase activity	GO:0048040	5	11	CL786CONTIG1, CL4677CONTIG1, CL505CONTIG1, CL354CONTIG1, CL1380CONTIG1,	0.0006392

## Sheet: HypoDown
FDR<	Function	GO-ID	in set	total	genes	p
0.05	4-coumarate-CoA ligase activity	GO:0016207	6	18	CL2522CONTIG1, CL237CONTIG1, CL524CONTIG1, LQ0AAB34YB14FM1.SCF, CL7097CONTIG1, CL3037CONTIG1,	0.002582
0.1	aconitate hydratase activity	GO:0003994	3	3	CL5165CONTIG1, CL1061CONTIG1, CL6424CONTIG1,	0.002504
0.05	acyl-CoA ligase activity	GO:0003996	6	14	CL2522CONTIG1, CL237CONTIG1, CL524CONTIG1, LQ0AAB34YB14FM1.SCF, CL7097CONTIG1, CL3037CONTIG1,	0.0005581
0.1	alanine transaminase activity	GO:0004021	7	12	CL2218CONTIG1, CL3510CONTIG1, CL6772CONTIG1, CL692CONTIG1, CL4299CONTIG1, CL2216CONTIG1, LQ0AAB50YM15FM1.SCF,	0.0003555
0.05	amine binding	GO:0043176	3	5	CL594CONTIG1, CL7099CONTIG1, CL7484CONTIG1,	0.005122
0.05	amino acid binding	GO:0016597	3	5	CL594CONTIG1, CL7099CONTIG1, CL7484CONTIG1,	0.005122
0.1	amino acid kinase activity	GO:0019202	6	10	CL7099CONTIG1, CL4734CONTIG1, CL2305CONTIG1, LQ0AAB43YJ03FM1.SCF, CL1823CONTIG1, CL3345CONTIG1,	0.000799
0.1	amino-acid N-acetyltransferase activity	GO:0004042	6	10	CL3616CONTIG1, CL4734CONTIG1, LQ0AAB43YJ03FM1.SCF, CL4166CONTIG1, LQ0ACA24YE10RM1.SCF, CL1147CONTIG1,	0.000799
0.1	aminoacyl-tRNA ligase activity	GO:0004812	21	83	CL2712CONTIG1, CL2779CONTIG1, CL1909CONTIG1, CL2380CONTIG1, LQ0ACA8YN15RM1.SCF, CL2522CONTIG1, CL237CONTIG1, CL900CONTIG1, CL2581CONTIG1, CL5561CONTIG1, CL2930CONTIG1, LQ0AAB5YI19FM1.SCF, LQ0AAB67YB22FM1.SCF, CL524CONTIG1, LQ0AAB34YB14FM1.SCF, LQ0AAB82YF17FM1.SCF, CL7097CONTIG1, CL3037CONTIG1, LQ0ACA13YP17RM1.SCF, LQ0AAB84YC16FM1.SCF, LQ0ADA22YH06RM1.SCF,	0.002937
0.05	aminoacyl-tRNA ligase activity	GO:0004812	18	83	CL2712CONTIG1, CL2779CONTIG1, CL1909CONTIG1, CL2380CONTIG1, LQ0ACA8YN15RM1.SCF, CL2522CONTIG1, CL237CONTIG1, CL900CONTIG1, CL2581CONTIG1, CL5561CONTIG1, CL2930CONTIG1, LQ0AAB5YI19FM1.SCF, LQ0AAB67YB22FM1.SCF, CL524CONTIG1, LQ0AAB34YB14FM1.SCF, LQ0AAB82YF17FM1.SCF, CL7097CONTIG1, CL3037CONTIG1,	0.0001299
0.05	ammonia-lyase activity	GO:0016841	7	24	CL314CONTIG1, CL1513CONTIG1, LQ0ADA3YJ12RM1.SCF, CL269CONTIG2, CL4376CONTIG1, CL2988CONTIG1, LQ0AAB66YM16FM1.SCF,	0.002703
0.1	anthranilate synthase activity	GO:0004049	5	9	LQ0AAB24YL08FM1.SCF, CL6576CONTIG1, CL1691CONTIG1, LQ0ACA17YC18RM1.SCF, CL6510CONTIG1,	0.003598
0.1	antioxidant activity	GO:0016209	36	146	CL201CONTIG2, LQ0AAB97YC16FM1.SCF, CL2730CONTIG1, CL369CONTIG1, CL4512CONTIG1, LQ0AAB82YE24RM1.SCF, CL5022CONTIG1, CL317CONTIG1, CL125CONTIG1, LQ0AAB41YN15FM1.SCF, CL845CONTIG1, LQ0AAB13YC19FM1.SCF, CL4847CONTIG1, CL2191CONTIG1, CL5294CONTIG1, CL5754CONTIG1, CL485CONTIG2, CL1310CONTIG1, CL5814CONTIG1, CL3927CONTIG1, CL1794CONTIG1, CL770CONTIG1, CL6127CONTIG1, CL484CONTIG1, CL837CONTIG1, CL1773CON…	0.0001992
0.05	antioxidant activity	GO:0016209	25	146	CL201CONTIG2, LQ0AAB97YC16FM1.SCF, CL2730CONTIG1, CL369CONTIG1, CL4512CONTIG1, LQ0AAB82YE24RM1.SCF, CL5022CONTIG1, CL317CONTIG1, CL125CONTIG1, LQ0AAB41YN15FM1.SCF, CL845CONTIG1, LQ0AAB13YC19FM1.SCF, CL4847CONTIG1, CL2191CONTIG1, CL5294CONTIG1, CL5754CONTIG1, CL485CONTIG2, CL1310CONTIG1, CL5814CONTIG1, CL3927CONTIG1, CL1794CONTIG1, CL770CONTIG1, CL6127CONTIG1, CL484CONTIG1, CL837CONTIG1,	0.0003943
0.1	aromatic-amino-acid transaminase activity	GO:0008793	8	14	CL2218CONTIG1, CL3510CONTIG1, CL2492CONTIG1, CL6772CONTIG1, CL692CONTIG1, CL4299CONTIG1, CL2216CONTIG1, LQ0AAB50YM15FM1.SCF,	0.0001586
0.05	aromatic-amino-acid transaminase activity	GO:0008793	5	14	CL2218CONTIG1, CL3510CONTIG1, CL2492CONTIG1, CL6772CONTIG1, CL692CONTIG1,	0.004255
0.1	aspartate carbamoyltransferase activity	GO:0004070	4	5	CL594CONTIG1, LQ0AAB24YL08FM1.SCF, CL7484CONTIG1, CL1691CONTIG1,	0.001513
0.05	aspartate carbamoyltransferase activity	GO:0004070	4	5	CL594CONTIG1, LQ0AAB24YL08FM1.SCF, CL7484CONTIG1, CL1691CONTIG1,	0.0002263
0.1	aspartate transaminase activity	GO:0004069	13	23	CL2218CONTIG1, CL3510CONTIG1, CL2492CONTIG1, CL6772CONTIG1, CL402CONTIG1, CL324CONTIG1, CL692CONTIG1, CL968CONTIG1, CL1241CONTIG1, CL5691CONTIG1, CL4299CONTIG1, CL2216CONTIG1, LQ0AAB50YM15FM1.SCF,	1.513e-06
0.05	aspartate transaminase activity	GO:0004069	8	23	CL2218CONTIG1, CL3510CONTIG1, CL2492CONTIG1, CL6772CONTIG1, CL402CONTIG1, CL324CONTIG1, CL692CONTIG1, CL968CONTIG1,	0.0003597
0.1	biliverdin reductase activity	GO:0004074	5	9	CL3123CONTIG1, CL491CONTIG1, CL4897CONTIG1, CL941CONTIG1, CL3196CONTIG1,	0.003598
0.05	biliverdin reductase activity	GO:0004074	4	9	CL3123CONTIG1, CL491CONTIG1, CL4897CONTIG1, CL941CONTIG1,	0.00434
0.05	butyrate-CoA ligase activity	GO:0047760	4	8	CL237CONTIG1, CL524CONTIG1, CL7097CONTIG1, CL3037CONTIG1,	0.00258
0.1	carbon-carbon lyase activity	GO:0016830	27	106	CL1061CONTIG1, CL3439CONTIG1, LQ0AAB22YF09FM1.SCF, CL314CONTIG1, CL1050CONTIG1, CL1513CONTIG1, LQ0AAB24YL08FM1.SCF, CL5627CONTIG1, CL2873CONTIG1, CL6576CONTIG1, CL1691CONTIG1, CL1320CONTIG1, CL546CONTIG1, CL6994CONTIG1, CL6408CONTIG1, LQ0AAB78YE12RM1.SCF, CL4198CONTIG1, CL516CONTIG1, CL350CONTIG1, CL3388CONTIG1, CL4183CONTIG1, CL3542CONTIG1, CL3676CONTIG1, LQ0AAB2YH21FM1.SCF, LQ0ACA17YC18RM1.SCF,…	0.0007115
0.1	carbon-oxygen lyase activity	GO:0016835	29	95	CL5165CONTIG1, CL1061CONTIG1, CL3439CONTIG1, CL6735CONTIG1, CL1542CONTIG1, CL314CONTIG1, CL1513CONTIG1, LQ0ADA3YJ12RM1.SCF, CL5627CONTIG1, CL1846CONTIG1, CL320CONTIG1, LQ0AAB17YH02FM1.SCF, CL4376CONTIG1, CL2988CONTIG1, LQ0AAB66YM16FM1.SCF, LQ0AAB24YH18FM1.SCF, CL6408CONTIG1, CL5140CONTIG1, CL516CONTIG1, LQ0AAB41YH24FM1.SCF, LQ0AAB10YG21FM1.SCF, CL11CONTIG2, CL4049CONTIG1, CL6424CONTIG1, CL6108CON…	1.287e-05
0.05	carbon-oxygen lyase activity	GO:0016835	18	95	CL5165CONTIG1, CL1061CONTIG1, CL3439CONTIG1, CL6735CONTIG1, CL1542CONTIG1, CL314CONTIG1, CL1513CONTIG1, LQ0ADA3YJ12RM1.SCF, CL5627CONTIG1, CL1846CONTIG1, CL320CONTIG1, LQ0AAB17YH02FM1.SCF, CL4376CONTIG1, CL2988CONTIG1, LQ0AAB66YM16FM1.SCF, LQ0AAB24YH18FM1.SCF, CL6408CONTIG1, CL5140CONTIG1,	0.0007506
0.05	carbon-sulfur lyase activity	GO:0016846	9	37	CL2218CONTIG1, CL314CONTIG1, CL1513CONTIG1, CL5376CONTIG1, CL1846CONTIG1, CL3510CONTIG1, LQ0AAB21YI07FM1.SCF, LQ0AAB66YM16FM1.SCF, CL692CONTIG1,	0.002775
0.1	carboxyl- or carbamoyltransferase activity	GO:0016743	4	5	CL594CONTIG1, LQ0AAB24YL08FM1.SCF, CL7484CONTIG1, CL1691CONTIG1,	0.001513
0.05	carboxyl- or carbamoyltransferase activity	GO:0016743	4	5	CL594CONTIG1, LQ0AAB24YL08FM1.SCF, CL7484CONTIG1, CL1691CONTIG1,	0.0002263
0.1	catalase activity	GO:0004096	6	13	CL2730CONTIG1, CL369CONTIG1, CL5814CONTIG1, CL770CONTIG1, CL837CONTIG1, CL3504CONTIG1,	0.004538
0.05	catalase activity	GO:0004096	5	13	CL2730CONTIG1, CL369CONTIG1, CL5814CONTIG1, CL770CONTIG1, CL837CONTIG1,	0.002935
0.1	catalytic activity	GO:0003824	600	3826	CL1537CONTIG1, CL1656CONTIG1, LQ0AAB96YM22FM1.SCF, LQ0AAB75YL17RM1.SCF, CL2535CONTIG1, CL84CONTIG2, LQ0AAB17YG18FM1.SCF, LQ0AAB64YI13FM1.SCF, CL61CONTIG1, CL2712CONTIG1, CL1130CONTIG1, CL586CONTIG1, CL4246CONTIG1, CL105CONTIG1, LQ0AAB10YF11FM1.SCF, CL5165CONTIG1, CL1061CONTIG1, CL5857CONTIG1, CL790CONTIG1, CL2354CONTIG1, CL7437CONTIG1, CL3159CONTIG1, LQ0AAA17YI13FM1.SCF, CL44CONTIG3, CL3439CONTIG…	5.078e-11
0.05	catalytic activity	GO:0003824	365	3826	CL1537CONTIG1, CL1656CONTIG1, LQ0AAB96YM22FM1.SCF, LQ0AAB75YL17RM1.SCF, CL2535CONTIG1, CL84CONTIG2, LQ0AAB17YG18FM1.SCF, LQ0AAB64YI13FM1.SCF, CL61CONTIG1, CL2712CONTIG1, CL1130CONTIG1, CL586CONTIG1, CL4246CONTIG1, CL105CONTIG1, LQ0AAB10YF11FM1.SCF, CL5165CONTIG1, CL1061CONTIG1, CL5857CONTIG1, CL790CONTIG1, CL2354CONTIG1, CL7437CONTIG1, CL3159CONTIG1, LQ0AAA17YI13FM1.SCF, CL44CONTIG3, CL3439CONTIG…	3.985e-06
0.05	channel-conductance-controlling ATPase activity	GO:0005260	5	12	LQ0AAB91YM08FM1.SCF, CL6546CONTIG1, CL4489CONTIG1, CL6819CONTIG1, CL5854CONTIG1,	0.001938
0.1	chlorophyll binding	GO:0016168	17	47	CL71CONTIG1, CL1CONTIG43, CL1CONTIG19, CL1CONTIG25, CL1CONTIG31, CL1482CONTIG1, CL1CONTIG10, CL1CONTIG2, CL1CONTIG16, CL1CONTIG9, CL98CONTIG1, CL43CONTIG1, CL27CONTIG1, CL73CONTIG1, CL162CONTIG1, CL1CONTIG11, CL1CONTIG13,	7.862e-05
0.05	chlorophyll binding	GO:0016168	12	47	CL71CONTIG1, CL1CONTIG43, CL1CONTIG19, CL1CONTIG25, CL1CONTIG31, CL1482CONTIG1, CL1CONTIG10, CL1CONTIG2, CL1CONTIG16, CL1CONTIG9, CL98CONTIG1, CL43CONTIG1,	0.000355
0.1	CTP synthase activity	GO:0003883	4	5	CL6858CONTIG1, CL2172CONTIG1, CL2727CONTIG1, CL3788CONTIG1,	0.001513
0.1	cytochrome-c peroxidase activity	GO:0004130	5	9	CL2730CONTIG1, CL369CONTIG1, CL5814CONTIG1, CL837CONTIG1, CL3504CONTIG1,	0.003598
0.05	cytochrome-c peroxidase activity	GO:0004130	4	9	CL2730CONTIG1, CL369CONTIG1, CL5814CONTIG1, CL837CONTIG1,	0.00434
0.1	dinucleotide insertion or deletion binding	GO:0032139	5	6	CL3414CONTIG1, CL4009CONTIG1, CL6232CONTIG1, CL7746CONTIG1, CL2058CONTIG1,	0.0002446
0.05	dinucleotide insertion or deletion binding	GO:0032139	4	6	CL3414CONTIG1, CL4009CONTIG1, CL6232CONTIG1, CL7746CONTIG1,	0.0006338
0.1	disulfide oxidoreductase activity	GO:0015036	30	133	CL201CONTIG2, CL2209CONTIG1, LQ0AAB97YC16FM1.SCF, CL4780CONTIG1, CL4512CONTIG1, CL5022CONTIG1, CL37CONTIG1, CL270CONTIG1, CL317CONTIG1, CL125CONTIG1, LQ0AAB41YN15FM1.SCF, CL845CONTIG1, LQ0AAB13YC19FM1.SCF, CL4847CONTIG1, CL2191CONTIG1, CL5294CONTIG1, CL5754CONTIG1, CL485CONTIG2, CL1310CONTIG1, CL5704CONTIG1, LQ0AAB39YD12FM1.SCF, CL3927CONTIG1, CL6127CONTIG1, CL4758CONTIG1, CL484CONTIG1, CL84CONTI…	0.002992
0.05	disulfide oxidoreductase activity	GO:0015036	26	133	CL201CONTIG2, CL2209CONTIG1, LQ0AAB97YC16FM1.SCF, CL4780CONTIG1, CL4512CONTIG1, CL5022CONTIG1, CL37CONTIG1, CL270CONTIG1, CL317CONTIG1, CL125CONTIG1, LQ0AAB41YN15FM1.SCF, CL845CONTIG1, LQ0AAB13YC19FM1.SCF, CL4847CONTIG1, CL2191CONTIG1, CL5294CONTIG1, CL5754CONTIG1, CL485CONTIG2, CL1310CONTIG1, CL5704CONTIG1, LQ0AAB39YD12FM1.SCF, CL3927CONTIG1, CL6127CONTIG1, CL4758CONTIG1, CL484CONTIG1, CL84CONTI…	3.073e-05
0.1	DNA insertion or deletion binding	GO:0032135	5	6	CL3414CONTIG1, CL4009CONTIG1, CL6232CONTIG1, CL7746CONTIG1, CL2058CONTIG1,	0.0002446
0.05	DNA insertion or deletion binding	GO:0032135	4	6	CL3414CONTIG1, CL4009CONTIG1, CL6232CONTIG1, CL7746CONTIG1,	0.0006338
0.1	double-strand/single-strand DNA junction binding	GO:0000406	4	5	CL3414CONTIG1, CL6232CONTIG1, CL7746CONTIG1, CL2058CONTIG1,	0.001513
0.05	double-strand/single-strand DNA junction binding	GO:0000406	3	5	CL3414CONTIG1, CL6232CONTIG1, CL7746CONTIG1,	0.005122
0.1	fatty-acyl-CoA synthase activity	GO:0004321	7	14	CL6735CONTIG1, CL2522CONTIG1, CL237CONTIG1, LQ0AAB34YB14FM1.SCF, CL4049CONTIG1, CL6492CONTIG1, LQ0AAB50YO16FM1.SCF,	0.001202
0.05	glutamate synthase (NADH) activity	GO:0016040	3	5	CL2669CONTIG1, LQ0AAB39YD12FM1.SCF, CL484CONTIG1,	0.005122
0.1	glutamate synthase (NADPH) activity	GO:0004355	5	8	CL270CONTIG1, CL317CONTIG1, LQ0AAB41YN15FM1.SCF, CL2669CONTIG1, LQ0AAB39YD12FM1.SCF,	0.0018
0.05	glutamate synthase (NADPH) activity	GO:0004355	5	8	CL270CONTIG1, CL317CONTIG1, LQ0AAB41YN15FM1.SCF, CL2669CONTIG1, LQ0AAB39YD12FM1.SCF,	0.0001819
0.1	glutamate synthase activity	GO:0015930	7	13	CL5022CONTIG1, CL270CONTIG1, CL317CONTIG1, LQ0AAB41YN15FM1.SCF, CL2669CONTIG1, LQ0AAB39YD12FM1.SCF, CL484CONTIG1,	0.0006803
0.05	glutamate synthase activity	GO:0015930	7	13	CL5022CONTIG1, CL270CONTIG1, CL317CONTIG1, LQ0AAB41YN15FM1.SCF, CL2669CONTIG1, LQ0AAB39YD12FM1.SCF, CL484CONTIG1,	3.025e-05
0.1	glutamate synthase activity, NADH or NADPH as acceptor	GO:0045181	6	11	CL270CONTIG1, CL317CONTIG1, LQ0AAB41YN15FM1.SCF, CL2669CONTIG1, LQ0AAB39YD12FM1.SCF, CL484CONTIG1,	0.001556
0.05	glutamate synthase activity, NADH or NADPH as acceptor	GO:0045181	6	11	CL270CONTIG1, CL317CONTIG1, LQ0AAB41YN15FM1.SCF, CL2669CONTIG1, LQ0AAB39YD12FM1.SCF, CL484CONTIG1,	0.0001068
0.1	glutamine-phenylpyruvate transaminase activity	GO:0047316	5	6	CL3510CONTIG1, CL2492CONTIG1, CL692CONTIG1, CL2216CONTIG1, LQ0AAB50YM15FM1.SCF,	0.0002446
0.1	glutathione disulfide oxidoreductase activity	GO:0015038	20	71	CL201CONTIG2, LQ0AAB97YC16FM1.SCF, CL4512CONTIG1, CL5022CONTIG1, CL317CONTIG1, CL125CONTIG1, LQ0AAB41YN15FM1.SCF, CL845CONTIG1, LQ0AAB13YC19FM1.SCF, CL4847CONTIG1, CL2191CONTIG1, CL5294CONTIG1, CL5754CONTIG1, CL485CONTIG2, CL1310CONTIG1, CL3927CONTIG1, CL6127CONTIG1, CL1773CONTIG1, CL1470CONTIG1, LQ0AAB89YC12FM1.SCF,	0.0008931
0.05	glutathione disulfide oxidoreductase activity	GO:0015038	17	71	CL201CONTIG2, LQ0AAB97YC16FM1.SCF, CL4512CONTIG1, CL5022CONTIG1, CL317CONTIG1, CL125CONTIG1, LQ0AAB41YN15FM1.SCF, CL845CONTIG1, LQ0AAB13YC19FM1.SCF, CL4847CONTIG1, CL2191CONTIG1, CL5294CONTIG1, CL5754CONTIG1, CL485CONTIG2, CL1310CONTIG1, CL3927CONTIG1, CL6127CONTIG1,	5.35e-05
0.05	glutathione S-conjugate-exporting ATPase activity	GO:0015431	8	26	CL2769CONTIG1, LQ0AAB17YJ21FM1.SCF, LQ0AAB102YJ22FM1.SCF, CL6546CONTIG1, CL4489CONTIG1, LQ0AAA3YD06FM1.SCF, CL6819CONTIG1, CL5854CONTIG1,	0.0009155
0.1	glutathione-disulfide reductase activity	GO:0004362	19	70	CL201CONTIG2, LQ0AAB97YC16FM1.SCF, CL4512CONTIG1, CL5022CONTIG1, CL317CONTIG1, CL125CONTIG1, LQ0AAB41YN15FM1.SCF, CL845CONTIG1, LQ0AAB13YC19FM1.SCF, CL4847CONTIG1, CL2191CONTIG1, CL5294CONTIG1, CL5754CONTIG1, CL485CONTIG2, CL1310CONTIG1, CL6127CONTIG1, CL1773CONTIG1, CL1470CONTIG1, LQ0AAB89YC12FM1.SCF,	0.001925
0.05	glutathione-disulfide reductase activity	GO:0004362	16	70	CL201CONTIG2, LQ0AAB97YC16FM1.SCF, CL4512CONTIG1, CL5022CONTIG1, CL317CONTIG1, CL125CONTIG1, LQ0AAB41YN15FM1.SCF, CL845CONTIG1, LQ0AAB13YC19FM1.SCF, CL4847CONTIG1, CL2191CONTIG1, CL5294CONTIG1, CL5754CONTIG1, CL485CONTIG2, CL1310CONTIG1, CL6127CONTIG1,	0.0001596
0.1	glycine transaminase activity	GO:0047958	5	8	CL2218CONTIG1, CL3510CONTIG1, CL692CONTIG1, CL2216CONTIG1, LQ0AAB50YM15FM1.SCF,	0.0018
0.1	guanine/thymine mispair binding	GO:0032137	5	6	CL3414CONTIG1, CL4009CONTIG1, CL6232CONTIG1, CL7746CONTIG1, CL2058CONTIG1,	0.0002446
0.05	guanine/thymine mispair binding	GO:0032137	4	6	CL3414CONTIG1, CL4009CONTIG1, CL6232CONTIG1, CL7746CONTIG1,	0.0006338
0.1	histidinol-phosphate transaminase activity	GO:0004400	8	12	CL3510CONTIG1, CL2492CONTIG1, CL6772CONTIG1, LQ0AAB60YI07FM1.SCF, CL692CONTIG1, CL4299CONTIG1, CL2216CONTIG1, LQ0AAB50YM15FM1.SCF,	3.367e-05
0.05	histidinol-phosphate transaminase activity	GO:0004400	5	12	CL3510CONTIG1, CL2492CONTIG1, CL6772CONTIG1, LQ0AAB60YI07FM1.SCF, CL692CONTIG1,	0.001938
0.1	hydro-lyase activity	GO:0016836	24	80	CL5165CONTIG1, CL1061CONTIG1, CL3439CONTIG1, CL6735CONTIG1, CL1542CONTIG1, CL314CONTIG1, CL1513CONTIG1, LQ0ADA3YJ12RM1.SCF, CL5627CONTIG1, CL1846CONTIG1, CL320CONTIG1, LQ0AAB17YH02FM1.SCF, CL4376CONTIG1, CL6408CONTIG1, CL516CONTIG1, LQ0AAB41YH24FM1.SCF, LQ0AAB10YG21FM1.SCF, CL11CONTIG2, CL4049CONTIG1, CL6424CONTIG1, CL6108CONTIG1, LQ0AAB21YK12FM1.SCF, CL3542CONTIG1, CL1851CONTIG1,	9.69e-05
0.05	integrin binding	GO:0005178	3	5	LQ0AAB9YJ16FM1.SCF, CL986CONTIG1, LQ0AAB35YI22FM1.SCF,	0.005122
0.1	intramolecular oxidoreductase activity	GO:0016860	21	75	LQ0AAB97YC16FM1.SCF, LQ0ADA3YJ12RM1.SCF, CL612CONTIG1, CL327CONTIG2, CL4847CONTIG1, CL320CONTIG1, CL568CONTIG3, CL1310CONTIG1, CL4376CONTIG1, CL1691CONTIG1, CL6408CONTIG1, CL6127CONTIG1, CL7560CONTIG1, CL1773CONTIG1, CL7495CONTIG1, CL516CONTIG1, LQ0AAB89YC12FM1.SCF, CL6424CONTIG1, LQ0ACA17YC18RM1.SCF, CL6510CONTIG1, CL3196CONTIG1,	0.0007308
0.1	isoleucine-tRNA ligase activity	GO:0004822	8	21	CL2779CONTIG1, CL900CONTIG1, CL2581CONTIG1, CL524CONTIG1, LQ0AAB34YB14FM1.SCF, CL7097CONTIG1, CL3037CONTIG1, LQ0ADA22YH06RM1.SCF,	0.004464
0.05	isoleucine-tRNA ligase activity	GO:0004822	7	21	CL2779CONTIG1, CL900CONTIG1, CL2581CONTIG1, CL524CONTIG1, LQ0AAB34YB14FM1.SCF, CL7097CONTIG1, CL3037CONTIG1,	0.001133
0.1	isomerase activity	GO:0016853	52	221	CL1537CONTIG1, CL3123CONTIG1, LQ0AAB97YC16FM1.SCF, LQ0AAB10YI09FM1.SCF, CL1713CONTIG1, CL1542CONTIG1, CL1513CONTIG1, LQ0AAB31YE01FM1.SCF, LQ0ADA3YJ12RM1.SCF, LQ0AAB1YC06RM1.SCF, CL1409CONTIG1, CL612CONTIG1, CL327CONTIG2, CL237CONTIG1, CL4695CONTIG1, LQ0AAB1YG17RM1.SCF, CL4847CONTIG1, CL320CONTIG1, CL568CONTIG3, CL402CONTIG1, LQ0AAB24YL13FM1.SCF, CL3774CONTIG1, CL1310CONTIG1, CL4376CONTIG1, CL1485…	3.246e-05
0.05	isomerase activity	GO:0016853	33	221	CL1537CONTIG1, CL3123CONTIG1, LQ0AAB97YC16FM1.SCF, LQ0AAB10YI09FM1.SCF, CL1713CONTIG1, CL1542CONTIG1, CL1513CONTIG1, LQ0AAB31YE01FM1.SCF, LQ0ADA3YJ12RM1.SCF, LQ0AAB1YC06RM1.SCF, CL1409CONTIG1, CL612CONTIG1, CL327CONTIG2, CL237CONTIG1, CL4695CONTIG1, LQ0AAB1YG17RM1.SCF, CL4847CONTIG1, CL320CONTIG1, CL568CONTIG3, CL402CONTIG1, LQ0AAB24YL13FM1.SCF, CL3774CONTIG1, CL1310CONTIG1, CL4376CONTIG1, CL1485…	0.0006784
0.1	kynurenine-oxoglutarate transaminase activity	GO:0016212	5	7	CL3510CONTIG1, CL2492CONTIG1, CL692CONTIG1, CL2216CONTIG1, LQ0AAB50YM15FM1.SCF,	0.0007599
0.1	L-ascorbate peroxidase activity	GO:0016688	6	10	CL2730CONTIG1, CL369CONTIG1, CL5814CONTIG1, CL837CONTIG1, CL3504CONTIG1, CL917CONTIG1,	0.000799
0.05	leucine-tRNA ligase activity	GO:0004823	6	15	CL2779CONTIG1, CL900CONTIG1, CL2581CONTIG1, CL524CONTIG1, LQ0AAB34YB14FM1.SCF, CL3037CONTIG1,	0.000865
0.05	ligase activity	GO:0016874	43	313	CL2712CONTIG1, CL7437CONTIG1, CL3159CONTIG1, CL44CONTIG3, CL2779CONTIG1, CL1909CONTIG1, CL6858CONTIG1, CL2380CONTIG1, CL6326CONTIG1, LQ0ACA8YN15RM1.SCF, CL2296CONTIG1, CL2522CONTIG1, CL6063CONTIG1, CL5959CONTIG1, LQ0AAB24YL08FM1.SCF, CL237CONTIG1, CL900CONTIG1, CL2581CONTIG1, LQ0AAB2YE24FM1.SCF, CL7424CONTIG1, CL5613CONTIG1, CL44CONTIG1, CL320CONTIG1, CL5561CONTIG1, LQ0AAB32YA13FM1.SCF, CL2930CON…	0.0006821
0.1	ligase activity, forming aminoacyl-tRNA and related compounds	GO:0016876	21	83	CL2712CONTIG1, CL2779CONTIG1, CL1909CONTIG1, CL2380CONTIG1, LQ0ACA8YN15RM1.SCF, CL2522CONTIG1, CL237CONTIG1, CL900CONTIG1, CL2581CONTIG1, CL5561CONTIG1, CL2930CONTIG1, LQ0AAB5YI19FM1.SCF, LQ0AAB67YB22FM1.SCF, CL524CONTIG1, LQ0AAB34YB14FM1.SCF, LQ0AAB82YF17FM1.SCF, CL7097CONTIG1, CL3037CONTIG1, LQ0ACA13YP17RM1.SCF, LQ0AAB84YC16FM1.SCF, LQ0ADA22YH06RM1.SCF,	0.002937
0.05	ligase activity, forming aminoacyl-tRNA and related compounds	GO:0016876	18	83	CL2712CONTIG1, CL2779CONTIG1, CL1909CONTIG1, CL2380CONTIG1, LQ0ACA8YN15RM1.SCF, CL2522CONTIG1, CL237CONTIG1, CL900CONTIG1, CL2581CONTIG1, CL5561CONTIG1, CL2930CONTIG1, LQ0AAB5YI19FM1.SCF, LQ0AAB67YB22FM1.SCF, CL524CONTIG1, LQ0AAB34YB14FM1.SCF, LQ0AAB82YF17FM1.SCF, CL7097CONTIG1, CL3037CONTIG1,	0.0001299
0.1	ligase activity, forming carbon-oxygen bonds	GO:0016875	21	83	CL2712CONTIG1, CL2779CONTIG1, CL1909CONTIG1, CL2380CONTIG1, LQ0ACA8YN15RM1.SCF, CL2522CONTIG1, CL237CONTIG1, CL900CONTIG1, CL2581CONTIG1, CL5561CONTIG1, CL2930CONTIG1, LQ0AAB5YI19FM1.SCF, LQ0AAB67YB22FM1.SCF, CL524CONTIG1, LQ0AAB34YB14FM1.SCF, LQ0AAB82YF17FM1.SCF, CL7097CONTIG1, CL3037CONTIG1, LQ0ACA13YP17RM1.SCF, LQ0AAB84YC16FM1.SCF, LQ0ADA22YH06RM1.SCF,	0.002937
0.05	ligase activity, forming carbon-oxygen bonds	GO:0016875	18	83	CL2712CONTIG1, CL2779CONTIG1, CL1909CONTIG1, CL2380CONTIG1, LQ0ACA8YN15RM1.SCF, CL2522CONTIG1, CL237CONTIG1, CL900CONTIG1, CL2581CONTIG1, CL5561CONTIG1, CL2930CONTIG1, LQ0AAB5YI19FM1.SCF, LQ0AAB67YB22FM1.SCF, CL524CONTIG1, LQ0AAB34YB14FM1.SCF, LQ0AAB82YF17FM1.SCF, CL7097CONTIG1, CL3037CONTIG1,	0.0001299
0.1	loop DNA binding	GO:0000404	5	6	CL3414CONTIG1, CL4009CONTIG1, CL6232CONTIG1, CL7746CONTIG1, CL2058CONTIG1,	0.0002446
0.05	loop DNA binding	GO:0000404	4	6	CL3414CONTIG1, CL4009CONTIG1, CL6232CONTIG1, CL7746CONTIG1,	0.0006338
0.1	lyase activity	GO:0016829	63	217	CL5165CONTIG1, CL1061CONTIG1, CL3439CONTIG1, LQ0AAB22YF09FM1.SCF, CL6735CONTIG1, CL2218CONTIG1, CL1542CONTIG1, CL314CONTIG1, CL1050CONTIG1, CL1513CONTIG1, LQ0ADA3YJ12RM1.SCF, LQ0AAB24YL08FM1.SCF, CL5376CONTIG1, CL5627CONTIG1, CL269CONTIG2, CL1846CONTIG1, CL2873CONTIG1, CL6576CONTIG1, CL3510CONTIG1, CL1335CONTIG1, CL320CONTIG1, LQ0AAB17YH02FM1.SCF, CL686CONTIG1, LQ0AAB69YA01RM1.SCF, CL4376CONTIG1,…	1.039e-09
0.05	lyase activity	GO:0016829	39	217	CL5165CONTIG1, CL1061CONTIG1, CL3439CONTIG1, LQ0AAB22YF09FM1.SCF, CL6735CONTIG1, CL2218CONTIG1, CL1542CONTIG1, CL314CONTIG1, CL1050CONTIG1, CL1513CONTIG1, LQ0ADA3YJ12RM1.SCF, LQ0AAB24YL08FM1.SCF, CL5376CONTIG1, CL5627CONTIG1, CL269CONTIG2, CL1846CONTIG1, CL2873CONTIG1, CL6576CONTIG1, CL3510CONTIG1, CL1335CONTIG1, CL320CONTIG1, LQ0AAB17YH02FM1.SCF, CL686CONTIG1, LQ0AAB69YA01RM1.SCF, CL4376CONTIG1,…	2.906e-06
0.05	lysine-tRNA ligase activity	GO:0004824	7	21	CL2380CONTIG1, LQ0ACA8YN15RM1.SCF, CL2522CONTIG1, CL237CONTIG1, LQ0AAB34YB14FM1.SCF, CL7097CONTIG1, CL3037CONTIG1,	0.001133
0.1	methionine adenosyltransferase activity	GO:0004478	4	6	CL5857CONTIG1, CL257CONTIG1, CL1995CONTIG1, CL2746CONTIG1,	0.00405
0.1	mismatched DNA binding	GO:0030983	5	6	CL3414CONTIG1, CL4009CONTIG1, CL6232CONTIG1, CL7746CONTIG1, CL2058CONTIG1,	0.0002446
0.05	mismatched DNA binding	GO:0030983	4	6	CL3414CONTIG1, CL4009CONTIG1, CL6232CONTIG1, CL7746CONTIG1,	0.0006338
0.1	mispaired DNA binding	GO:0032134	5	6	CL3414CONTIG1, CL4009CONTIG1, CL6232CONTIG1, CL7746CONTIG1, CL2058CONTIG1,	0.0002446
0.05	mispaired DNA binding	GO:0032134	4	6	CL3414CONTIG1, CL4009CONTIG1, CL6232CONTIG1, CL7746CONTIG1,	0.0006338
0.05	molybdate ion transmembrane transporter activity	GO:0015098	8	33	CL2769CONTIG1, CL4228CONTIG1, LQ0AAB91YM08FM1.SCF, LQ0AAB17YJ21FM1.SCF, LQ0AAB102YJ22FM1.SCF, CL6546CONTIG1, CL4489CONTIG1, CL6819CONTIG1,	0.004831
0.05	molybdate transmembrane-transporting ATPase activity	GO:0015412	8	33	CL2769CONTIG1, CL4228CONTIG1, LQ0AAB91YM08FM1.SCF, LQ0AAB17YJ21FM1.SCF, LQ0AAB102YJ22FM1.SCF, CL6546CONTIG1, CL4489CONTIG1, CL6819CONTIG1,	0.004831
0.1	NAD(P) transhydrogenase activity	GO:0008746	8	20	CL4606CONTIG1, LQ0AAB10YI09FM1.SCF, CL4512CONTIG1, CL5022CONTIG1, LQ0AAB41YN15FM1.SCF, CL5754CONTIG1, CL1470CONTIG1, CL1992CONTIG1,	0.00313
0.05	NAD(P) transhydrogenase activity	GO:0008746	6	20	CL4606CONTIG1, LQ0AAB10YI09FM1.SCF, CL4512CONTIG1, CL5022CONTIG1, LQ0AAB41YN15FM1.SCF, CL5754CONTIG1,	0.004668
0.1	NAD(P)+ transhydrogenase (B-specific) activity	GO:0003957	8	20	CL4606CONTIG1, LQ0AAB10YI09FM1.SCF, CL4512CONTIG1, CL5022CONTIG1, LQ0AAB41YN15FM1.SCF, CL5754CONTIG1, CL1470CONTIG1, CL1992CONTIG1,	0.00313
0.05	NAD(P)+ transhydrogenase (B-specific) activity	GO:0003957	6	20	CL4606CONTIG1, LQ0AAB10YI09FM1.SCF, CL4512CONTIG1, CL5022CONTIG1, LQ0AAB41YN15FM1.SCF, CL5754CONTIG1,	0.004668
0.1	NADH dehydrogenase activity	GO:0003954	17	61	CL3123CONTIG1, CL1542CONTIG1, CL4512CONTIG1, CL37CONTIG1, LQ0AAB13YC19FM1.SCF, CL2448CONTIG1, CL1127CONTIG1, CL5704CONTIG1, CL484CONTIG1, CL543CONTIG1, CL2071CONTIG1, CL1470CONTIG1, CL887CONTIG1, CL2408CONTIG1, CL966CONTIG1, CL431CONTIG1, CL3196CONTIG1,	0.002411
0.05	o-succinylbenzoate-CoA ligase activity	GO:0008756	6	16	CL2522CONTIG1, CL237CONTIG1, CL524CONTIG1, LQ0AAB34YB14FM1.SCF, CL7097CONTIG1, CL3037CONTIG1,	0.001287
0.1	oxidoreductase activity	GO:0016491	151	718	CL1656CONTIG1, CL61CONTIG1, CL4246CONTIG1, LQ0AAB10YF11FM1.SCF, CL790CONTIG1, CL7437CONTIG1, CL201CONTIG2, CL6735CONTIG1, CL2209CONTIG1, CL3123CONTIG1, LQ0AAB97YC16FM1.SCF, CL4606CONTIG1, CL2730CONTIG1, CL369CONTIG1, CL7099CONTIG1, LQ0AAB10YI09FM1.SCF, CL7245CONTIG1, LQ0AAB7YL14FM1.SCF, CL1542CONTIG1, CL4780CONTIG1, CL4512CONTIG1, CL3942CONTIG1, CL7727CONTIG1, CL5083CONTIG1, LQ0AAB82YE24RM1.SCF, …	2.751e-09
0.05	oxidoreductase activity	GO:0016491	86	718	CL1656CONTIG1, CL61CONTIG1, CL4246CONTIG1, LQ0AAB10YF11FM1.SCF, CL790CONTIG1, CL7437CONTIG1, CL201CONTIG2, CL6735CONTIG1, CL2209CONTIG1, CL3123CONTIG1, LQ0AAB97YC16FM1.SCF, CL4606CONTIG1, CL2730CONTIG1, CL369CONTIG1, CL7099CONTIG1, LQ0AAB10YI09FM1.SCF, CL7245CONTIG1, LQ0AAB7YL14FM1.SCF, CL1542CONTIG1, CL4780CONTIG1, CL4512CONTIG1, CL3942CONTIG1, CL7727CONTIG1, CL5083CONTIG1, LQ0AAB82YE24RM1.SCF, …	0.0002328
0.1	oxidoreductase activity, acting on NADH or NADPH	GO:0016651	31	126	CL790CONTIG1, CL3123CONTIG1, CL4606CONTIG1, LQ0AAB10YI09FM1.SCF, CL1542CONTIG1, CL4512CONTIG1, CL5022CONTIG1, CL37CONTIG1, LQ0AAB41YN15FM1.SCF, LQ0AAB13YC19FM1.SCF, CL2448CONTIG1, CL2191CONTIG1, CL5754CONTIG1, CL1127CONTIG1, CL485CONTIG2, CL4897CONTIG1, CL5704CONTIG1, CL484CONTIG1, CL543CONTIG1, CL2071CONTIG1, LQ0AAB91YI21FM1.SCF, CL1470CONTIG1, CL1186CONTIG1, CL887CONTIG1, CL1992CONTIG1, CL2408C…	0.0005653
0.1	oxidoreductase activity, acting on NADH or NADPH, NAD or NADP as acceptor	GO:0016652	10	26	CL790CONTIG1, CL4606CONTIG1, LQ0AAB10YI09FM1.SCF, CL4512CONTIG1, CL5022CONTIG1, LQ0AAB41YN15FM1.SCF, CL5754CONTIG1, CL1470CONTIG1, CL1186CONTIG1, CL1992CONTIG1,	0.00138
0.05	oxidoreductase activity, acting on NADH or NADPH, NAD or NADP as acceptor	GO:0016652	7	26	CL790CONTIG1, CL4606CONTIG1, LQ0AAB10YI09FM1.SCF, CL4512CONTIG1, CL5022CONTIG1, LQ0AAB41YN15FM1.SCF, CL5754CONTIG1,	0.004437
0.1	oxidoreductase activity, acting on sulfur group of donors	GO:0016667	35	164	CL201CONTIG2, CL2209CONTIG1, LQ0AAB97YC16FM1.SCF, CL4780CONTIG1, CL4512CONTIG1, CL5022CONTIG1, CL37CONTIG1, CL270CONTIG1, LQ0AAB22YC12FM1.SCF, CL317CONTIG1, CL125CONTIG1, LQ0AAB22YP19FM1.SCF, LQ0AAB41YN15FM1.SCF, CL845CONTIG1, LQ0AAB13YC19FM1.SCF, CL4847CONTIG1, CL2191CONTIG1, CL5294CONTIG1, CL5754CONTIG1, CL485CONTIG2, CL1310CONTIG1, CL5704CONTIG1, LQ0AAB39YD12FM1.SCF, CL3927CONTIG1, CL324CONTIG…	0.003757
0.05	oxidoreductase activity, acting on sulfur group of donors	GO:0016667	30	164	CL201CONTIG2, CL2209CONTIG1, LQ0AAB97YC16FM1.SCF, CL4780CONTIG1, CL4512CONTIG1, CL5022CONTIG1, CL37CONTIG1, CL270CONTIG1, LQ0AAB22YC12FM1.SCF, CL317CONTIG1, CL125CONTIG1, LQ0AAB22YP19FM1.SCF, LQ0AAB41YN15FM1.SCF, CL845CONTIG1, LQ0AAB13YC19FM1.SCF, CL4847CONTIG1, CL2191CONTIG1, CL5294CONTIG1, CL5754CONTIG1, CL485CONTIG2, CL1310CONTIG1, CL5704CONTIG1, LQ0AAB39YD12FM1.SCF, CL3927CONTIG1, CL324CONTIG…	2.939e-05
0.05	oxidoreductase activity, acting on sulfur group of donors, NAD or NADP as acceptor	GO:0016668	18	96	CL201CONTIG2, LQ0AAB97YC16FM1.SCF, CL4512CONTIG1, CL5022CONTIG1, CL37CONTIG1, CL317CONTIG1, CL125CONTIG1, LQ0AAB41YN15FM1.SCF, CL845CONTIG1, LQ0AAB13YC19FM1.SCF, CL4847CONTIG1, CL2191CONTIG1, CL5294CONTIG1, CL5754CONTIG1, CL485CONTIG2, CL1310CONTIG1, CL6127CONTIG1, CL484CONTIG1,	0.000854
0.1	oxidoreductase activity, acting on the aldehyde or oxo group of donors	GO:0016903	27	94	CL61CONTIG1, CL790CONTIG1, CL7099CONTIG1, CL4512CONTIG1, CL1325CONTIG1, LQ0AAB41YN15FM1.SCF, CL568CONTIG3, CL2250CONTIG1, CL5294CONTIG1, CL5754CONTIG1, CL4897CONTIG1, CL6192CONTIG1, CL1632CONTIG1, CL625CONTIG1, CL1823CONTIG1, CL930CONTIG1, LQ0AAA3YM20FM1.SCF, CL1396CONTIG1, CL1470CONTIG1, CL2319CONTIG1, CL1186CONTIG1, CL248CONTIG2, CL304CONTIG1, CL3651CONTIG1, CL5317CONTIG1, CL6089CONTIG1, CL3196…	8.351e-05
0.1	oxidoreductase activity, acting on the aldehyde or oxo group of donors, NAD or NADP as acceptor	GO:0016620	19	65	CL61CONTIG1, CL7099CONTIG1, CL568CONTIG3, CL2250CONTIG1, CL5294CONTIG1, CL4897CONTIG1, CL6192CONTIG1, CL625CONTIG1, CL1823CONTIG1, CL930CONTIG1, LQ0AAA3YM20FM1.SCF, CL1396CONTIG1, CL2319CONTIG1, CL248CONTIG2, CL304CONTIG1, CL3651CONTIG1, CL5317CONTIG1, CL6089CONTIG1, CL3196CONTIG1,	0.0007258
0.1	oxidoreductase activity, acting on the CH-NH2 group of donors	GO:0016638	15	51	CL1656CONTIG1, CL4512CONTIG1, CL5022CONTIG1, CL270CONTIG1, CL2561CONTIG1, CL317CONTIG1, LQ0AAB41YN15FM1.SCF, LQ0AAB48YJ16FM1.SCF, CL5754CONTIG1, CL2669CONTIG1, LQ0AAB39YD12FM1.SCF, CL484CONTIG1, CL1091CONTIG1, CL1470CONTIG1, CL352CONTIG1,	0.002402
0.05	oxidoreductase activity, acting on the CH-NH2 group of donors	GO:0016638	12	51	CL1656CONTIG1, CL4512CONTIG1, CL5022CONTIG1, CL270CONTIG1, CL2561CONTIG1, CL317CONTIG1, LQ0AAB41YN15FM1.SCF, LQ0AAB48YJ16FM1.SCF, CL5754CONTIG1, CL2669CONTIG1, LQ0AAB39YD12FM1.SCF, CL484CONTIG1,	0.000792
0.1	oxidoreductase activity, acting on the CH-NH2 group of donors, NAD or NADP as acceptor	GO:0016639	8	15	CL1656CONTIG1, CL270CONTIG1, CL2561CONTIG1, CL317CONTIG1, LQ0AAB41YN15FM1.SCF, CL2669CONTIG1, LQ0AAB39YD12FM1.SCF, CL484CONTIG1,	0.0002995
0.05	oxidoreductase activity, acting on the CH-NH2 group of donors, NAD or NADP as acceptor	GO:0016639	8	15	CL1656CONTIG1, CL270CONTIG1, CL2561CONTIG1, CL317CONTIG1, LQ0AAB41YN15FM1.SCF, CL2669CONTIG1, LQ0AAB39YD12FM1.SCF, CL484CONTIG1,	8.626e-06
0.1	oxo-acid-lyase activity	GO:0016833	11	33	CL1050CONTIG1, LQ0AAB24YL08FM1.SCF, CL5627CONTIG1, CL6576CONTIG1, CL1691CONTIG1, CL6408CONTIG1, CL516CONTIG1, CL3542CONTIG1, LQ0AAB2YH21FM1.SCF, LQ0ACA17YC18RM1.SCF, CL6510CONTIG1,	0.003062
0.1	peptide disulfide oxidoreductase activity	GO:0015037	20	71	CL201CONTIG2, LQ0AAB97YC16FM1.SCF, CL4512CONTIG1, CL5022CONTIG1, CL317CONTIG1, CL125CONTIG1, LQ0AAB41YN15FM1.SCF, CL845CONTIG1, LQ0AAB13YC19FM1.SCF, CL4847CONTIG1, CL2191CONTIG1, CL5294CONTIG1, CL5754CONTIG1, CL485CONTIG2, CL1310CONTIG1, CL3927CONTIG1, CL6127CONTIG1, CL1773CONTIG1, CL1470CONTIG1, LQ0AAB89YC12FM1.SCF,	0.0008931
0.05	peptide disulfide oxidoreductase activity	GO:0015037	17	71	CL201CONTIG2, LQ0AAB97YC16FM1.SCF, CL4512CONTIG1, CL5022CONTIG1, CL317CONTIG1, CL125CONTIG1, LQ0AAB41YN15FM1.SCF, CL845CONTIG1, LQ0AAB13YC19FM1.SCF, CL4847CONTIG1, CL2191CONTIG1, CL5294CONTIG1, CL5754CONTIG1, CL485CONTIG2, CL1310CONTIG1, CL3927CONTIG1, CL6127CONTIG1,	5.35e-05
0.1	proline-tRNA ligase activity	GO:0004827	6	12	CL2712CONTIG1, CL5561CONTIG1, CL2930CONTIG1, LQ0AAB5YI19FM1.SCF, LQ0AAB67YB22FM1.SCF, LQ0ACA13YP17RM1.SCF,	0.002757
0.05	proline-tRNA ligase activity	GO:0004827	5	12	CL2712CONTIG1, CL5561CONTIG1, CL2930CONTIG1, LQ0AAB5YI19FM1.SCF, LQ0AAB67YB22FM1.SCF,	0.001938
0.1	pyruvate dehydrogenase activity	GO:0004738	8	19	CL790CONTIG1, CL4512CONTIG1, CL1325CONTIG1, LQ0AAB41YN15FM1.SCF, CL5754CONTIG1, CL1470CONTIG1, CL1186CONTIG1, CL3651CONTIG1,	0.002128
0.05	salicylate 1-monooxygenase activity	GO:0018658	4	7	CL4780CONTIG1, CL836CONTIG1, CL7CONTIG8, CL84CONTIG3,	0.001381
0.1	serine-tRNA ligase activity	GO:0004828	3	3	CL2930CONTIG1, LQ0AAB5YI19FM1.SCF, LQ0AAB67YB22FM1.SCF,	0.002504
0.05	serine-tRNA ligase activity	GO:0004828	3	3	CL2930CONTIG1, LQ0AAB5YI19FM1.SCF, LQ0AAB67YB22FM1.SCF,	0.0005825
0.1	sigma factor activity	GO:0016987	6	11	LQ0AAB44YH03FM1.SCF, CL7308CONTIG1, CL5536CONTIG1, LQ0AAB40YE23FM1.SCF, LQ0AAA21YH07FM1.SCF, LQ0AAB100YF24FM1.SCF,	0.001556
0.1	single base insertion or deletion binding	GO:0032138	5	6	CL3414CONTIG1, CL4009CONTIG1, CL6232CONTIG1, CL7746CONTIG1, CL2058CONTIG1,	0.0002446
0.05	single base insertion or deletion binding	GO:0032138	4	6	CL3414CONTIG1, CL4009CONTIG1, CL6232CONTIG1, CL7746CONTIG1,	0.0006338
0.1	tetrapyrrole binding	GO:0046906	19	68	CL71CONTIG1, CL1CONTIG43, CL1CONTIG19, CL1CONTIG25, CL1CONTIG31, CL1482CONTIG1, CL1CONTIG10, CL1CONTIG2, CL1CONTIG16, CL1CONTIG9, CL98CONTIG1, CL43CONTIG1, CL27CONTIG1, CL73CONTIG1, CL162CONTIG1, LQ0AAB42YI07FM1.SCF, CL1CONTIG11, LQ0AAB21YJ14FM1.SCF, CL1CONTIG13,	0.001325
0.05	thioredoxin-disulfide reductase activity	GO:0004791	12	61	CL201CONTIG2, LQ0AAB97YC16FM1.SCF, CL4512CONTIG1, CL5022CONTIG1, LQ0AAB41YN15FM1.SCF, CL845CONTIG1, LQ0AAB13YC19FM1.SCF, CL4847CONTIG1, CL5754CONTIG1, CL1310CONTIG1, CL6127CONTIG1, CL484CONTIG1,	0.00403
0.1	transaminase activity	GO:0008483	20	48	CL2218CONTIG1, CL5376CONTIG1, CL3510CONTIG1, CL2492CONTIG1, CL6772CONTIG1, CL402CONTIG1, LQ0AAB60YI07FM1.SCF, CL6029CONTIG1, CL324CONTIG1, CL692CONTIG1, CL3013CONTIG1, CL968CONTIG1, CL1241CONTIG1, CL5691CONTIG1, CL352CONTIG1, CL4299CONTIG1, LQ0AAB43YF24FM1.SCF, CL2216CONTIG1, CL651CONTIG1, LQ0AAB50YM15FM1.SCF,	1.443e-06
0.05	transaminase activity	GO:0008483	12	48	CL2218CONTIG1, CL5376CONTIG1, CL3510CONTIG1, CL2492CONTIG1, CL6772CONTIG1, CL402CONTIG1, LQ0AAB60YI07FM1.SCF, CL6029CONTIG1, CL324CONTIG1, CL692CONTIG1, CL3013CONTIG1, CL968CONTIG1,	0.0004382
0.1	transcription initiation factor activity	GO:0016986	6	12	LQ0AAB44YH03FM1.SCF, CL7308CONTIG1, CL5536CONTIG1, LQ0AAB40YE23FM1.SCF, LQ0AAA21YH07FM1.SCF, LQ0AAB100YF24FM1.SCF,	0.002757
0.1	transferase activity, transferring alkyl or aryl (other than methyl) groups	GO:0016765	22	89	CL5857CONTIG1, CL257CONTIG1, CL6670CONTIG1, CL686CONTIG1, CL519CONTIG1, CL487CONTIG1, CL2179CONTIG1, CL703CONTIG1, CL1995CONTIG1, CL622CONTIG1, CL2936CONTIG1, CL7495CONTIG1, CL4176CONTIG1, LQ0AAB2YF15FM1.SCF, LQ0AAB57YP06FM1.SCF, CL760CONTIG1, CL5716CONTIG1, LQ0AAB30YP16FM1.SCF, CL4049CONTIG1, CL2767CONTIG1, CL2746CONTIG1, CL2280CONTIG1,	0.003226
0.1	transferase activity, transferring nitrogenous groups	GO:0016769	20	48	CL2218CONTIG1, CL5376CONTIG1, CL3510CONTIG1, CL2492CONTIG1, CL6772CONTIG1, CL402CONTIG1, LQ0AAB60YI07FM1.SCF, CL6029CONTIG1, CL324CONTIG1, CL692CONTIG1, CL3013CONTIG1, CL968CONTIG1, CL1241CONTIG1, CL5691CONTIG1, CL352CONTIG1, CL4299CONTIG1, LQ0AAB43YF24FM1.SCF, CL2216CONTIG1, CL651CONTIG1, LQ0AAB50YM15FM1.SCF,	1.443e-06
0.05	transferase activity, transferring nitrogenous groups	GO:0016769	12	48	CL2218CONTIG1, CL5376CONTIG1, CL3510CONTIG1, CL2492CONTIG1, CL6772CONTIG1, CL402CONTIG1, LQ0AAB60YI07FM1.SCF, CL6029CONTIG1, CL324CONTIG1, CL692CONTIG1, CL3013CONTIG1, CL968CONTIG1,	0.0004382
0.1	transferase activity, transferring pentosyl groups	GO:0016763	17	45	CL105CONTIG1, CL5857CONTIG1, CL5373CONTIG1, CL4639CONTIG1, CL4734CONTIG1, CL1335CONTIG1, LQ0AAB43YJ03FM1.SCF, CL1691CONTIG1, CL2751CONTIG1, CL6029CONTIG1, CL3265CONTIG1, CL1015CONTIG1, CL2190CONTIG1, CL6800CONTIG1, CL4509CONTIG1, CL6510CONTIG1, CL2746CONTIG1,	4.129e-05
0.05	transferase activity, transferring pentosyl groups	GO:0016763	10	45	CL105CONTIG1, CL5857CONTIG1, CL5373CONTIG1, CL4639CONTIG1, CL4734CONTIG1, CL1335CONTIG1, LQ0AAB43YJ03FM1.SCF, CL1691CONTIG1, CL2751CONTIG1, CL6029CONTIG1,	0.003362
0.05	trypanothione-disulfide reductase activity	GO:0015042	5	14	CL4512CONTIG1, CL5022CONTIG1, LQ0AAB41YN15FM1.SCF, CL4847CONTIG1, CL5754CONTIG1,	0.004255
0.1	tyrosine transaminase activity	GO:0004838	8	13	CL2218CONTIG1, CL3510CONTIG1, CL2492CONTIG1, CL6772CONTIG1, CL692CONTIG1, CL4299CONTIG1, CL2216CONTIG1, LQ0AAB50YM15FM1.SCF,	7.713e-05
0.05	tyrosine transaminase activity	GO:0004838	5	13	CL2218CONTIG1, CL3510CONTIG1, CL2492CONTIG1, CL6772CONTIG1, CL692CONTIG1,	0.002935
0.1	uroporphyrinogen decarboxylase activity	GO:0004853	3	3	LQ0AAB22YF09FM1.SCF, CL2873CONTIG1, CL4183CONTIG1,	0.002504
0.05	very-long-chain-fatty-acid-CoA ligase activity	GO:0031957	5	14	CL2522CONTIG1, CL237CONTIG1, CL524CONTIG1, CL7097CONTIG1, CL3037CONTIG1,	0.004255
0.1	Y-form DNA binding	GO:0000403	4	5	CL3414CONTIG1, CL6232CONTIG1, CL7746CONTIG1, CL2058CONTIG1,	0.001513
0.05	Y-form DNA binding	GO:0000403	3	5	CL3414CONTIG1, CL6232CONTIG1, CL7746CONTIG1,	0.005122

## Sheet: OxiDown
FDR<	Function	GO-ID	in set	total	genes	p
0.1	11-beta-hydroxysteroid dehydrogenase activity	GO:0003845	9	20	CL7245CONTIG1, CL5317CONTIG1, CL1621CONTIG2, CL2721CONTIG1, LQ0AAB65YD19FM1.SCF, CL1738CONTIG1, CL1251CONTIG1, CL6192CONTIG1, LQ0AAA3YM20FM1.SCF,	0.0002956
0.1	2-deoxy-D-gluconate 3-dehydrogenase activity	GO:0008678	8	20	CL7245CONTIG1, CL1204CONTIG1, CL5317CONTIG1, CL1565CONTIG1, CL1738CONTIG1, CL1251CONTIG1, CL6192CONTIG1, LQ0AAA3YM20FM1.SCF,	0.001651
0.1	3-isopropylmalate dehydratase activity	GO:0003861	3	3	CL1061CONTIG1, CL5165CONTIG1, LQ0AAB102YB02FM1.SCF,	0.001864
0.05	3-isopropylmalate dehydratase activity	GO:0003861	3	3	CL1061CONTIG1, CL5165CONTIG1, LQ0AAB102YB02FM1.SCF,	0.0003154
0.1	3-oxoacyl-[acyl-carrier-protein] reductase activity	GO:0004316	15	50	CL4049CONTIG1, CL7245CONTIG1, CL625CONTIG1, CL1204CONTIG1, CL5317CONTIG1, CL6089CONTIG1, CL1495CONTIG1, CL1565CONTIG1, CL1621CONTIG2, CL2721CONTIG1, LQ0AAB65YD19FM1.SCF, CL1738CONTIG1, CL1251CONTIG1, CL6192CONTIG1, LQ0AAA3YM20FM1.SCF,	0.0006941
0.1	aconitate hydratase activity	GO:0003994	3	3	CL1061CONTIG1, CL5165CONTIG1, CL6424CONTIG1,	0.001864
0.1	acyl carrier activity	GO:0000036	3	3	LQ0ACA4YK04RM1.SCF, CL571CONTIG1, CL490CONTIG1,	0.001864
0.1	amino acid kinase activity	GO:0019202	6	10	CL3345CONTIG1, CL7099CONTIG1, CL2305CONTIG1, LQ0AAB43YJ03FM1.SCF, CL1823CONTIG1, CL4734CONTIG1,	0.0004642
0.05	amino acid kinase activity	GO:0019202	6	10	CL3345CONTIG1, CL7099CONTIG1, CL2305CONTIG1, LQ0AAB43YJ03FM1.SCF, CL1823CONTIG1, CL4734CONTIG1,	1.614e-05
0.1	aspartate carbamoyltransferase activity	GO:0004070	4	5	LQ0AAB24YL08FM1.SCF, CL594CONTIG1, CL7484CONTIG1, CL1691CONTIG1,	0.001032
0.1	biliverdin reductase activity	GO:0004074	5	9	CL491CONTIG1, CL3123CONTIG1, CL1495CONTIG1, CL4897CONTIG1, CL1609CONTIG1,	0.002304
0.1	carbon-oxygen lyase activity	GO:0016835	23	95	CL1061CONTIG1, CL4049CONTIG1, LQ0AAB17YH02FM1.SCF, CL1542CONTIG1, CL786CONTIG1, CL11CONTIG2, CL505CONTIG1, CL1846CONTIG1, CL5165CONTIG1, CL6408CONTIG1, LQ0AAB102YB02FM1.SCF, CL3649CONTIG1, CL4376CONTIG1, CL2988CONTIG1, CL7667CONTIG1, CL6735CONTIG1, CL4677CONTIG1, LQ0AAB21YK12FM1.SCF, CL516CONTIG1, LQ0AAB10YG21FM1.SCF, CL6031CONTIG1, CL1931CONTIG1, CL6424CONTIG1,	0.0009383
0.1	carboxyl- or carbamoyltransferase activity	GO:0016743	4	5	LQ0AAB24YL08FM1.SCF, CL594CONTIG1, CL7484CONTIG1, CL1691CONTIG1,	0.001032
0.1	catalytic activity	GO:0003824	527	3826	CL1036CONTIG1, CL2751CONTIG1, CL3333CONTIG1, CL5561CONTIG1, CL1917CONTIG1, CL1061CONTIG1, CL703CONTIG1, CL6779CONTIG1, CL125CONTIG1, CL7004CONTIG1, CL1018CONTIG1, CL7025CONTIG1, CL93CONTIG1, CL1829CONTIG1, CL4728CONTIG1, CL2561CONTIG1, CL4512CONTIG1, CL4049CONTIG1, LQ0AAB3YE12FM1.SCF, CL2028CONTIG1, LQ0ACA21YD07RM1.SCF, CL4780CONTIG1, CL3237CONTIG1, LQ0AAB17YH02FM1.SCF, LQ0AAB16YE14FM3.SCF, LQ0AA…	1.673e-06
0.05	catalytic activity	GO:0003824	300	3826	CL1036CONTIG1, CL2751CONTIG1, CL3333CONTIG1, CL5561CONTIG1, CL1917CONTIG1, CL1061CONTIG1, CL703CONTIG1, CL6779CONTIG1, CL125CONTIG1, CL7004CONTIG1, CL1018CONTIG1, CL7025CONTIG1, CL93CONTIG1, CL1829CONTIG1, CL4728CONTIG1, CL2561CONTIG1, CL4512CONTIG1, CL4049CONTIG1, LQ0AAB3YE12FM1.SCF, CL2028CONTIG1, LQ0ACA21YD07RM1.SCF, CL4780CONTIG1, CL3237CONTIG1, LQ0AAB17YH02FM1.SCF, LQ0AAB16YE14FM3.SCF, LQ0AA…	1.025e-05
0.1	chlorophyll binding	GO:0016168	16	47	CL73CONTIG1, CL1CONTIG16, CL1CONTIG19, CL98CONTIG1, CL71CONTIG1, CL1CONTIG34, CL1CONTIG56, CL1CONTIG31, CL1CONTIG11, CL1CONTIG10, CL1CONTIG15, CL1CONTIG2, CL1CONTIG9, CL43CONTIG1, CL162CONTIG2, CL27CONTIG1,	8.874e-05
0.05	glutamate 5-kinase activity	GO:0004349	3	4	LQ0AAB43YJ03FM1.SCF, CL1823CONTIG1, CL4734CONTIG1,	0.001197
0.05	histidinol-phosphate transaminase activity	GO:0004400	5	12	CL3510CONTIG1, CL2492CONTIG1, CL6772CONTIG1, LQ0AAB60YI07FM1.SCF, CL692CONTIG1,	0.001938
0.1	hydro-lyase activity	GO:0016836	21	80	CL1061CONTIG1, CL4049CONTIG1, LQ0AAB17YH02FM1.SCF, CL1542CONTIG1, CL786CONTIG1, CL11CONTIG2, CL505CONTIG1, CL1846CONTIG1, CL5165CONTIG1, CL6408CONTIG1, LQ0AAB102YB02FM1.SCF, CL3649CONTIG1, CL4376CONTIG1, CL6735CONTIG1, CL4677CONTIG1, LQ0AAB21YK12FM1.SCF, CL516CONTIG1, LQ0AAB10YG21FM1.SCF, CL6031CONTIG1, CL1931CONTIG1, CL6424CONTIG1,	0.0004951
0.1	hydro-lyase activity	GO:0016836	24	80	CL5165CONTIG1, CL1061CONTIG1, CL3439CONTIG1, CL6735CONTIG1, CL1542CONTIG1, CL314CONTIG1, CL1513CONTIG1, LQ0ADA3YJ12RM1.SCF, CL5627CONTIG1, CL1846CONTIG1, CL320CONTIG1, LQ0AAB17YH02FM1.SCF, CL4376CONTIG1, CL6408CONTIG1, CL516CONTIG1, LQ0AAB41YH24FM1.SCF, LQ0AAB10YG21FM1.SCF, CL11CONTIG2, CL4049CONTIG1, CL6424CONTIG1, CL6108CONTIG1, LQ0AAB21YK12FM1.SCF, CL3542CONTIG1, CL1851CONTIG1,	9.69e-05
0.1	inorganic anion transmembrane transporter activity	GO:0015103	29	139	CL116CONTIG2, CL1341CONTIG1, LQ0AAB44YL01FM1.SCF, CL6038CONTIG1, CL7752CONTIG1, CL4489CONTIG1, CL3378CONTIG1, CL48CONTIG1, LQ0AAB17YJ17FM1.SCF, CL4854CONTIG1, CL6498CONTIG1, CL7163CONTIG1, CL48CONTIG2, CL2056CONTIG1, LQ0AAB17YJ21FM1.SCF, CL2887CONTIG1, CL2219CONTIG1, CL3091CONTIG1, CL4228CONTIG1, CL1086CONTIG1, CL2769CONTIG1, LQ0AAB40YE19FM1.SCF, CL2637CONTIG1, LQ0AAB38YL09FM1.SCF, LQ0AAB65YC22FM…	0.002704
0.05	integrin binding	GO:0005178	3	5	LQ0AAB9YJ16FM1.SCF, CL986CONTIG1, LQ0AAB35YI22FM1.SCF,	0.005122
0.1	intramolecular oxidoreductase activity	GO:0016860	21	75	LQ0AAB97YC16FM1.SCF, LQ0ADA3YJ12RM1.SCF, CL612CONTIG1, CL327CONTIG2, CL4847CONTIG1, CL320CONTIG1, CL568CONTIG3, CL1310CONTIG1, CL4376CONTIG1, CL1691CONTIG1, CL6408CONTIG1, CL6127CONTIG1, CL7560CONTIG1, CL1773CONTIG1, CL7495CONTIG1, CL516CONTIG1, LQ0AAB89YC12FM1.SCF, CL6424CONTIG1, LQ0ACA17YC18RM1.SCF, CL6510CONTIG1, CL3196CONTIG1,	0.0007308
0.1	isoleucine-tRNA ligase activity	GO:0004822	8	21	CL2779CONTIG1, CL900CONTIG1, CL2581CONTIG1, CL524CONTIG1, LQ0AAB34YB14FM1.SCF, CL7097CONTIG1, CL3037CONTIG1, LQ0ADA22YH06RM1.SCF,	0.004464
0.05	isoleucine-tRNA ligase activity	GO:0004822	7	21	CL2779CONTIG1, CL900CONTIG1, CL2581CONTIG1, CL524CONTIG1, LQ0AAB34YB14FM1.SCF, CL7097CONTIG1, CL3037CONTIG1,	0.001133
0.1	isomerase activity	GO:0016853	52	221	CL1537CONTIG1, CL3123CONTIG1, LQ0AAB97YC16FM1.SCF, LQ0AAB10YI09FM1.SCF, CL1713CONTIG1, CL1542CONTIG1, CL1513CONTIG1, LQ0AAB31YE01FM1.SCF, LQ0ADA3YJ12RM1.SCF, LQ0AAB1YC06RM1.SCF, CL1409CONTIG1, CL612CONTIG1, CL327CONTIG2, CL237CONTIG1, CL4695CONTIG1, LQ0AAB1YG17RM1.SCF, CL4847CONTIG1, CL320CONTIG1, CL568CONTIG3, CL402CONTIG1, LQ0AAB24YL13FM1.SCF, CL3774CONTIG1, CL1310CONTIG1, CL4376CONTIG1, CL1485…	3.246e-05
0.05	isomerase activity	GO:0016853	33	221	CL1537CONTIG1, CL3123CONTIG1, LQ0AAB97YC16FM1.SCF, LQ0AAB10YI09FM1.SCF, CL1713CONTIG1, CL1542CONTIG1, CL1513CONTIG1, LQ0AAB31YE01FM1.SCF, LQ0ADA3YJ12RM1.SCF, LQ0AAB1YC06RM1.SCF, CL1409CONTIG1, CL612CONTIG1, CL327CONTIG2, CL237CONTIG1, CL4695CONTIG1, LQ0AAB1YG17RM1.SCF, CL4847CONTIG1, CL320CONTIG1, CL568CONTIG3, CL402CONTIG1, LQ0AAB24YL13FM1.SCF, CL3774CONTIG1, CL1310CONTIG1, CL4376CONTIG1, CL1485…	0.0006784
0.1	kynurenine-oxoglutarate transaminase activity	GO:0016212	5	7	CL3510CONTIG1, CL2492CONTIG1, CL692CONTIG1, CL2216CONTIG1, LQ0AAB50YM15FM1.SCF,	0.0007599
0.1	L-ascorbate peroxidase activity	GO:0016688	6	10	CL2730CONTIG1, CL369CONTIG1, CL5814CONTIG1, CL837CONTIG1, CL3504CONTIG1, CL917CONTIG1,	0.000799
0.05	leucine-tRNA ligase activity	GO:0004823	6	15	CL2779CONTIG1, CL900CONTIG1, CL2581CONTIG1, CL524CONTIG1, LQ0AAB34YB14FM1.SCF, CL3037CONTIG1,	0.000865
0.1	L-iditol 2-dehydrogenase activity	GO:0003939	10	25	CL7245CONTIG1, CL625CONTIG1, CL1204CONTIG1, CL5317CONTIG1, CL6089CONTIG1, CL1565CONTIG1, CL1621CONTIG2, CL1738CONTIG1, CL1251CONTIG1, CL6192CONTIG1,	0.0004354
0.05	L-iditol 2-dehydrogenase activity	GO:0003939	7	25	CL7245CONTIG1, CL625CONTIG1, CL1204CONTIG1, CL5317CONTIG1, CL6089CONTIG1, CL1565CONTIG1, CL1621CONTIG2,	0.001069
0.05	ligase activity	GO:0016874	43	313	CL2712CONTIG1, CL7437CONTIG1, CL3159CONTIG1, CL44CONTIG3, CL2779CONTIG1, CL1909CONTIG1, CL6858CONTIG1, CL2380CONTIG1, CL6326CONTIG1, LQ0ACA8YN15RM1.SCF, CL2296CONTIG1, CL2522CONTIG1, CL6063CONTIG1, CL5959CONTIG1, LQ0AAB24YL08FM1.SCF, CL237CONTIG1, CL900CONTIG1, CL2581CONTIG1, LQ0AAB2YE24FM1.SCF, CL7424CONTIG1, CL5613CONTIG1, CL44CONTIG1, CL320CONTIG1, CL5561CONTIG1, LQ0AAB32YA13FM1.SCF, CL2930CON…	0.0006821
0.1	ligase activity, forming aminoacyl-tRNA and related compounds	GO:0016876	21	83	CL2712CONTIG1, CL2779CONTIG1, CL1909CONTIG1, CL2380CONTIG1, LQ0ACA8YN15RM1.SCF, CL2522CONTIG1, CL237CONTIG1, CL900CONTIG1, CL2581CONTIG1, CL5561CONTIG1, CL2930CONTIG1, LQ0AAB5YI19FM1.SCF, LQ0AAB67YB22FM1.SCF, CL524CONTIG1, LQ0AAB34YB14FM1.SCF, LQ0AAB82YF17FM1.SCF, CL7097CONTIG1, CL3037CONTIG1, LQ0ACA13YP17RM1.SCF, LQ0AAB84YC16FM1.SCF, LQ0ADA22YH06RM1.SCF,	0.002937
0.05	ligase activity, forming aminoacyl-tRNA and related compounds	GO:0016876	18	83	CL2712CONTIG1, CL2779CONTIG1, CL1909CONTIG1, CL2380CONTIG1, LQ0ACA8YN15RM1.SCF, CL2522CONTIG1, CL237CONTIG1, CL900CONTIG1, CL2581CONTIG1, CL5561CONTIG1, CL2930CONTIG1, LQ0AAB5YI19FM1.SCF, LQ0AAB67YB22FM1.SCF, CL524CONTIG1, LQ0AAB34YB14FM1.SCF, LQ0AAB82YF17FM1.SCF, CL7097CONTIG1, CL3037CONTIG1,	0.0001299
0.1	ligase activity, forming carbon-oxygen bonds	GO:0016875	21	83	CL2712CONTIG1, CL2779CONTIG1, CL1909CONTIG1, CL2380CONTIG1, LQ0ACA8YN15RM1.SCF, CL2522CONTIG1, CL237CONTIG1, CL900CONTIG1, CL2581CONTIG1, CL5561CONTIG1, CL2930CONTIG1, LQ0AAB5YI19FM1.SCF, LQ0AAB67YB22FM1.SCF, CL524CONTIG1, LQ0AAB34YB14FM1.SCF, LQ0AAB82YF17FM1.SCF, CL7097CONTIG1, CL3037CONTIG1, LQ0ACA13YP17RM1.SCF, LQ0AAB84YC16FM1.SCF, LQ0ADA22YH06RM1.SCF,	0.002937
0.05	ligase activity, forming carbon-oxygen bonds	GO:0016875	18	83	CL2712CONTIG1, CL2779CONTIG1, CL1909CONTIG1, CL2380CONTIG1, LQ0ACA8YN15RM1.SCF, CL2522CONTIG1, CL237CONTIG1, CL900CONTIG1, CL2581CONTIG1, CL5561CONTIG1, CL2930CONTIG1, LQ0AAB5YI19FM1.SCF, LQ0AAB67YB22FM1.SCF, CL524CONTIG1, LQ0AAB34YB14FM1.SCF, LQ0AAB82YF17FM1.SCF, CL7097CONTIG1, CL3037CONTIG1,	0.0001299
0.1	loop DNA binding	GO:0000404	5	6	CL3414CONTIG1, CL4009CONTIG1, CL6232CONTIG1, CL7746CONTIG1, CL2058CONTIG1,	0.0002446
0.05	loop DNA binding	GO:0000404	4	6	CL3414CONTIG1, CL4009CONTIG1, CL6232CONTIG1, CL7746CONTIG1,	0.0006338
0.1	lyase activity	GO:0016829	50	217	CL1061CONTIG1, CL4049CONTIG1, LQ0AAB17YH02FM1.SCF, LQ0AAB50YM15FM1.SCF, CL2873CONTIG1, CL1542CONTIG1, CL786CONTIG1, CL11CONTIG2, CL7572CONTIG1, CL505CONTIG1, CL6994CONTIG1, CL2643CONTIG1, CL1846CONTIG1, LQ0ACA17YC18RM1.SCF, CL5165CONTIG1, CL350CONTIG1, CL6408CONTIG1, LQ0AAB22YF09FM1.SCF, LQ0AAB68YE21FM1.SCF, LQ0AAB102YB02FM1.SCF, CL4183CONTIG1, CL269CONTIG2, CL3649CONTIG1, CL4376CONTIG1, LQ0AAB22…	5.521e-06
0.1	lyase activity	GO:0016829	63	217	CL5165CONTIG1, CL1061CONTIG1, CL3439CONTIG1, LQ0AAB22YF09FM1.SCF, CL6735CONTIG1, CL2218CONTIG1, CL1542CONTIG1, CL314CONTIG1, CL1050CONTIG1, CL1513CONTIG1, LQ0ADA3YJ12RM1.SCF, LQ0AAB24YL08FM1.SCF, CL5376CONTIG1, CL5627CONTIG1, CL269CONTIG2, CL1846CONTIG1, CL2873CONTIG1, CL6576CONTIG1, CL3510CONTIG1, CL1335CONTIG1, CL320CONTIG1, LQ0AAB17YH02FM1.SCF, CL686CONTIG1, LQ0AAB69YA01RM1.SCF, CL4376CONTIG1,…	1.039e-09
0.05	lyase activity	GO:0016829	39	217	CL5165CONTIG1, CL1061CONTIG1, CL3439CONTIG1, LQ0AAB22YF09FM1.SCF, CL6735CONTIG1, CL2218CONTIG1, CL1542CONTIG1, CL314CONTIG1, CL1050CONTIG1, CL1513CONTIG1, LQ0ADA3YJ12RM1.SCF, LQ0AAB24YL08FM1.SCF, CL5376CONTIG1, CL5627CONTIG1, CL269CONTIG2, CL1846CONTIG1, CL2873CONTIG1, CL6576CONTIG1, CL3510CONTIG1, CL1335CONTIG1, CL320CONTIG1, LQ0AAB17YH02FM1.SCF, CL686CONTIG1, LQ0AAB69YA01RM1.SCF, CL4376CONTIG1,…	2.906e-06
0.05	lysine-tRNA ligase activity	GO:0004824	7	21	CL2380CONTIG1, LQ0ACA8YN15RM1.SCF, CL2522CONTIG1, CL237CONTIG1, LQ0AAB34YB14FM1.SCF, CL7097CONTIG1, CL3037CONTIG1,	0.001133
0.1	methionine adenosyltransferase activity	GO:0004478	4	6	CL5857CONTIG1, CL257CONTIG1, CL1995CONTIG1, CL2746CONTIG1,	0.00405
0.1	methyltransferase activity	GO:0008168	32	155	CL3333CONTIG1, CL4049CONTIG1, CL5594CONTIG1, LQ0AAA10YD04FM1.SCF, CL1233CONTIG1, CL1753CONTIG1, CL4639CONTIG1, CL1437CONTIG1, LQ0AAB41YE16FM1.SCF, LQ0ADA1YC12RM1.SCF, LQ0AAB102YF18FM1.SCF, CL1781CONTIG1, CL7068CONTIG1, CL664CONTIG1, LQ0AAB45YB08FM1.SCF, CL519CONTIG1, CL4176CONTIG1, LQ0AAB11YL10FM1.SCF, CL5379CONTIG1, CL1873CONTIG1, CL3466CONTIG1, LQ0AAB13YL16FM1.SCF, CL5895CONTIG1, CL2535CONTIG1,…	0.001997
0.1	mismatched DNA binding	GO:0030983	5	6	CL3414CONTIG1, CL4009CONTIG1, CL6232CONTIG1, CL7746CONTIG1, CL2058CONTIG1,	0.0002446
0.05	mismatched DNA binding	GO:0030983	4	6	CL3414CONTIG1, CL4009CONTIG1, CL6232CONTIG1, CL7746CONTIG1,	0.0006338
0.1	mispaired DNA binding	GO:0032134	5	6	CL3414CONTIG1, CL4009CONTIG1, CL6232CONTIG1, CL7746CONTIG1, CL2058CONTIG1,	0.0002446
0.05	mispaired DNA binding	GO:0032134	4	6	CL3414CONTIG1, CL4009CONTIG1, CL6232CONTIG1, CL7746CONTIG1,	0.0006338
0.05	molybdate ion transmembrane transporter activity	GO:0015098	8	33	CL2769CONTIG1, CL4228CONTIG1, LQ0AAB91YM08FM1.SCF, LQ0AAB17YJ21FM1.SCF, LQ0AAB102YJ22FM1.SCF, CL6546CONTIG1, CL4489CONTIG1, CL6819CONTIG1,	0.004831
0.05	molybdate transmembrane-transporting ATPase activity	GO:0015412	8	33	CL2769CONTIG1, CL4228CONTIG1, LQ0AAB91YM08FM1.SCF, LQ0AAB17YJ21FM1.SCF, LQ0AAB102YJ22FM1.SCF, CL6546CONTIG1, CL4489CONTIG1, CL6819CONTIG1,	0.004831
0.05	monooxygenase activity	GO:0004497	14	80	CL1917CONTIG1, CL4780CONTIG1, CL5022CONTIG1, LQ0AAB34YB14FM1.SCF, CL7CONTIG8, CL270CONTIG1, CL484CONTIG1, CL37CONTIG1, CL2522CONTIG1, CL6957CONTIG1, LQ0AAB3YI12FM1.SCF, LQ0AAB4YL05FM1.SCF, CL6089CONTIG1, CL7321CONTIG1,	0.000892
0.1	NAD(P) transhydrogenase activity	GO:0008746	8	20	CL4606CONTIG1, LQ0AAB10YI09FM1.SCF, CL4512CONTIG1, CL5022CONTIG1, LQ0AAB41YN15FM1.SCF, CL5754CONTIG1, CL1470CONTIG1, CL1992CONTIG1,	0.00313
0.05	NAD(P) transhydrogenase activity	GO:0008746	6	20	CL4606CONTIG1, LQ0AAB10YI09FM1.SCF, CL4512CONTIG1, CL5022CONTIG1, LQ0AAB41YN15FM1.SCF, CL5754CONTIG1,	0.004668
0.1	NAD(P)+ transhydrogenase (B-specific) activity	GO:0003957	8	20	CL4606CONTIG1, LQ0AAB10YI09FM1.SCF, CL4512CONTIG1, CL5022CONTIG1, LQ0AAB41YN15FM1.SCF, CL5754CONTIG1, CL1470CONTIG1, CL1992CONTIG1,	0.00313
0.05	NAD(P)+ transhydrogenase (B-specific) activity	GO:0003957	6	20	CL4606CONTIG1, LQ0AAB10YI09FM1.SCF, CL4512CONTIG1, CL5022CONTIG1, LQ0AAB41YN15FM1.SCF, CL5754CONTIG1,	0.004668
0.1	NADH dehydrogenase activity	GO:0003954	16	61	CL4512CONTIG1, CL1542CONTIG1, CL484CONTIG1, CL37CONTIG1, CL5704CONTIG1, CL431CONTIG1, CL966CONTIG1, CL3123CONTIG1, CL847CONTIG1, CL1495CONTIG1, CL1127CONTIG1, CL543CONTIG1, LQ0AAB13YC19FM1.SCF, CL2448CONTIG1, CL4677CONTIG1, CL84CONTIG1,	0.002273
0.1	NADH dehydrogenase activity	GO:0003954	17	61	CL3123CONTIG1, CL1542CONTIG1, CL4512CONTIG1, CL37CONTIG1, LQ0AAB13YC19FM1.SCF, CL2448CONTIG1, CL1127CONTIG1, CL5704CONTIG1, CL484CONTIG1, CL543CONTIG1, CL2071CONTIG1, CL1470CONTIG1, CL887CONTIG1, CL2408CONTIG1, CL966CONTIG1, CL431CONTIG1, CL3196CONTIG1,	0.002411
0.1	nicotinate phosphoribosyltransferase activity	GO:0004516	3	3	LQ0AAB43YJ03FM1.SCF, CL4734CONTIG1, CL6279CONTIG1,	0.001864
0.05	nicotinate phosphoribosyltransferase activity	GO:0004516	3	3	LQ0AAB43YJ03FM1.SCF, CL4734CONTIG1, CL6279CONTIG1,	0.0003154
0.1	nitrate transmembrane transporter activity	GO:0015112	6	8	CL116CONTIG2, CL1341CONTIG1, CL6038CONTIG1, CL6498CONTIG1, CL1086CONTIG1, CL116CONTIG1,	7.713e-05
0.05	nitrate transmembrane transporter activity	GO:0015112	4	8	CL116CONTIG2, CL1341CONTIG1, CL6038CONTIG1, CL6498CONTIG1,	0.001199
0.1	nitrite transmembrane transporter activity	GO:0015113	5	6	CL116CONTIG2, CL1341CONTIG1, CL6038CONTIG1, CL1086CONTIG1, CL116CONTIG1,	0.0001512
0.05	o-succinylbenzoate-CoA ligase activity	GO:0008756	6	16	CL2522CONTIG1, CL237CONTIG1, CL524CONTIG1, LQ0AAB34YB14FM1.SCF, CL7097CONTIG1, CL3037CONTIG1,	0.001287
0.1	oxidoreductase activity	GO:0016491	144	718	CL1917CONTIG1, CL125CONTIG1, CL2561CONTIG1, CL4512CONTIG1, CL4049CONTIG1, LQ0AAB3YE12FM1.SCF, CL2028CONTIG1, CL4780CONTIG1, CL3237CONTIG1, CL1997CONTIG1, CL5716CONTIG1, CL491CONTIG1, CL5022CONTIG1, CL2506CONTIG1, CL369CONTIG1, LQ0AAB34YB14FM1.SCF, CL7CONTIG8, CL790CONTIG1, CL434CONTIG1, CL7099CONTIG1, CL640CONTIG1, CL1542CONTIG1, CL270CONTIG1, CL484CONTIG1, CL7437CONTIG1, CL2639CONTIG1, CL37CONTI…	1.733e-10
0.05	oxidoreductase activity	GO:0016491	83	718	CL1917CONTIG1, CL125CONTIG1, CL2561CONTIG1, CL4512CONTIG1, CL4049CONTIG1, LQ0AAB3YE12FM1.SCF, CL2028CONTIG1, CL4780CONTIG1, CL3237CONTIG1, CL1997CONTIG1, CL5716CONTIG1, CL491CONTIG1, CL5022CONTIG1, CL2506CONTIG1, CL369CONTIG1, LQ0AAB34YB14FM1.SCF, CL7CONTIG8, CL790CONTIG1, CL434CONTIG1, CL7099CONTIG1, CL640CONTIG1, CL1542CONTIG1, CL270CONTIG1, CL484CONTIG1, CL7437CONTIG1, CL2639CONTIG1, CL37CONTI…	4.013e-07
0.1	oxidoreductase activity	GO:0016491	151	718	CL1656CONTIG1, CL61CONTIG1, CL4246CONTIG1, LQ0AAB10YF11FM1.SCF, CL790CONTIG1, CL7437CONTIG1, CL201CONTIG2, CL6735CONTIG1, CL2209CONTIG1, CL3123CONTIG1, LQ0AAB97YC16FM1.SCF, CL4606CONTIG1, CL2730CONTIG1, CL369CONTIG1, CL7099CONTIG1, LQ0AAB10YI09FM1.SCF, CL7245CONTIG1, LQ0AAB7YL14FM1.SCF, CL1542CONTIG1, CL4780CONTIG1, CL4512CONTIG1, CL3942CONTIG1, CL7727CONTIG1, CL5083CONTIG1, LQ0AAB82YE24RM1.SCF, …	2.751e-09
0.05	oxidoreductase activity	GO:0016491	86	718	CL1656CONTIG1, CL61CONTIG1, CL4246CONTIG1, LQ0AAB10YF11FM1.SCF, CL790CONTIG1, CL7437CONTIG1, CL201CONTIG2, CL6735CONTIG1, CL2209CONTIG1, CL3123CONTIG1, LQ0AAB97YC16FM1.SCF, CL4606CONTIG1, CL2730CONTIG1, CL369CONTIG1, CL7099CONTIG1, LQ0AAB10YI09FM1.SCF, CL7245CONTIG1, LQ0AAB7YL14FM1.SCF, CL1542CONTIG1, CL4780CONTIG1, CL4512CONTIG1, CL3942CONTIG1, CL7727CONTIG1, CL5083CONTIG1, LQ0AAB82YE24RM1.SCF, …	0.0002328
0.1	oxidoreductase activity, acting on CH-OH group of donors	GO:0016614	44	203	CL4512CONTIG1, CL4049CONTIG1, CL2028CONTIG1, CL491CONTIG1, CL790CONTIG1, CL434CONTIG1, CL7099CONTIG1, CL1542CONTIG1, CL7245CONTIG1, CL625CONTIG1, CL786CONTIG1, CL431CONTIG1, CL1204CONTIG1, CL505CONTIG1, CL2264CONTIG1, CL5317CONTIG1, CL5083CONTIG1, CL3123CONTIG1, CL5649CONTIG1, CL6089CONTIG1, CL6408CONTIG1, LQ0AAB3YF22FM1.SCF, CL1495CONTIG1, CL930CONTIG1, LQ0AAB28YN11FM1.SCF, CL1565CONTIG1, CL1621…	9.73e-05
0.05	oxidoreductase activity, acting on CH-OH group of donors	GO:0016614	27	203	CL4512CONTIG1, CL4049CONTIG1, CL2028CONTIG1, CL491CONTIG1, CL790CONTIG1, CL434CONTIG1, CL7099CONTIG1, CL1542CONTIG1, CL7245CONTIG1, CL625CONTIG1, CL786CONTIG1, CL431CONTIG1, CL1204CONTIG1, CL505CONTIG1, CL2264CONTIG1, CL5317CONTIG1, CL5083CONTIG1, CL3123CONTIG1, CL5649CONTIG1, CL6089CONTIG1, CL6408CONTIG1, LQ0AAB3YF22FM1.SCF, CL1495CONTIG1, CL930CONTIG1, LQ0AAB28YN11FM1.SCF, CL1565CONTIG1, CL1621…	0.0005611
0.1	oxidoreductase activity, acting on NADH or NADPH	GO:0016651	33	126	CL4512CONTIG1, CL5022CONTIG1, CL790CONTIG1, CL1542CONTIG1, CL484CONTIG1, CL37CONTIG1, CL5704CONTIG1, LQ0AAB10YI09FM1.SCF, CL431CONTIG1, CL5169CONTIG1, CL966CONTIG1, LQ0AAB3YI12FM1.SCF, CL3123CONTIG1, CL847CONTIG1, CL1495CONTIG1, CL1127CONTIG1, LQ0AAB28YN11FM1.SCF, CL5754CONTIG1, CL4897CONTIG1, CL1992CONTIG1, LQ0AAB40YC09FM1.SCF, CL543CONTIG1, CL1186CONTIG1, LQ0AAB65YD19FM1.SCF, LQ0AAB13YC19FM1.SC…	1.426e-05
0.05	oxidoreductase activity, acting on NADH or NADPH	GO:0016651	19	126	CL4512CONTIG1, CL5022CONTIG1, CL790CONTIG1, CL1542CONTIG1, CL484CONTIG1, CL37CONTIG1, CL5704CONTIG1, LQ0AAB10YI09FM1.SCF, CL431CONTIG1, CL5169CONTIG1, CL966CONTIG1, LQ0AAB3YI12FM1.SCF, CL3123CONTIG1, CL847CONTIG1, CL1495CONTIG1, CL1127CONTIG1, LQ0AAB28YN11FM1.SCF, CL5754CONTIG1, CL4897CONTIG1,	0.000809
0.1	oxidoreductase activity, acting on NADH or NADPH	GO:0016651	31	126	CL790CONTIG1, CL3123CONTIG1, CL4606CONTIG1, LQ0AAB10YI09FM1.SCF, CL1542CONTIG1, CL4512CONTIG1, CL5022CONTIG1, CL37CONTIG1, LQ0AAB41YN15FM1.SCF, LQ0AAB13YC19FM1.SCF, CL2448CONTIG1, CL2191CONTIG1, CL5754CONTIG1, CL1127CONTIG1, CL485CONTIG2, CL4897CONTIG1, CL5704CONTIG1, CL484CONTIG1, CL543CONTIG1, CL2071CONTIG1, LQ0AAB91YI21FM1.SCF, CL1470CONTIG1, CL1186CONTIG1, CL887CONTIG1, CL1992CONTIG1, CL2408C…	0.0005653
0.1	oxidoreductase activity, acting on NADH or NADPH, NAD or NADP as acceptor	GO:0016652	11	26	CL4512CONTIG1, CL5022CONTIG1, CL790CONTIG1, LQ0AAB10YI09FM1.SCF, LQ0AAB28YN11FM1.SCF, CL5754CONTIG1, CL1992CONTIG1, CL1186CONTIG1, CL5060CONTIG1, CL4606CONTIG1, CL84CONTIG1,	0.0001234
0.1	oxidoreductase activity, acting on NADH or NADPH, NAD or NADP as acceptor	GO:0016652	10	26	CL790CONTIG1, CL4606CONTIG1, LQ0AAB10YI09FM1.SCF, CL4512CONTIG1, CL5022CONTIG1, LQ0AAB41YN15FM1.SCF, CL5754CONTIG1, CL1470CONTIG1, CL1186CONTIG1, CL1992CONTIG1,	0.00138
0.05	oxidoreductase activity, acting on NADH or NADPH, NAD or NADP as acceptor	GO:0016652	7	26	CL790CONTIG1, CL4606CONTIG1, LQ0AAB10YI09FM1.SCF, CL4512CONTIG1, CL5022CONTIG1, LQ0AAB41YN15FM1.SCF, CL5754CONTIG1,	0.004437
0.1	oxidoreductase activity, acting on paired donors, with incorporation or reduction of molecular oxygen	GO:0016705	27	113	CL1917CONTIG1, CL4780CONTIG1, CL5022CONTIG1, CL7CONTIG8, CL484CONTIG1, CL37CONTIG1, CL281CONTIG1, LQ0AAB9YH11FM1.SCF, CL6957CONTIG1, LQ0AAB3YI12FM1.SCF, LQ0AAB7YL14FM1.SCF, LQ0AAB4YL05FM1.SCF, CL6089CONTIG1, CL7321CONTIG1, CL1694CONTIG1, LQ0AAB79YN24FM1.SCF, CL3772CONTIG1, LQ0AAB40YC09FM1.SCF, CL6230CONTIG1, CL2485CONTIG1, CL1616CONTIG1, LQ0AAB14YP07FM1.SCF, LQ0AAB51YG07FM1.SCF, CL2191CONTIG1, CL…	0.0004375
0.1	oxidoreductase activity, acting on sulfur group of donors	GO:0016667	35	164	CL201CONTIG2, CL2209CONTIG1, LQ0AAB97YC16FM1.SCF, CL4780CONTIG1, CL4512CONTIG1, CL5022CONTIG1, CL37CONTIG1, CL270CONTIG1, LQ0AAB22YC12FM1.SCF, CL317CONTIG1, CL125CONTIG1, LQ0AAB22YP19FM1.SCF, LQ0AAB41YN15FM1.SCF, CL845CONTIG1, LQ0AAB13YC19FM1.SCF, CL4847CONTIG1, CL2191CONTIG1, CL5294CONTIG1, CL5754CONTIG1, CL485CONTIG2, CL1310CONTIG1, CL5704CONTIG1, LQ0AAB39YD12FM1.SCF, CL3927CONTIG1, CL324CONTIG…	0.003757
0.05	oxidoreductase activity, acting on sulfur group of donors	GO:0016667	30	164	CL201CONTIG2, CL2209CONTIG1, LQ0AAB97YC16FM1.SCF, CL4780CONTIG1, CL4512CONTIG1, CL5022CONTIG1, CL37CONTIG1, CL270CONTIG1, LQ0AAB22YC12FM1.SCF, CL317CONTIG1, CL125CONTIG1, LQ0AAB22YP19FM1.SCF, LQ0AAB41YN15FM1.SCF, CL845CONTIG1, LQ0AAB13YC19FM1.SCF, CL4847CONTIG1, CL2191CONTIG1, CL5294CONTIG1, CL5754CONTIG1, CL485CONTIG2, CL1310CONTIG1, CL5704CONTIG1, LQ0AAB39YD12FM1.SCF, CL3927CONTIG1, CL324CONTIG…	2.939e-05
0.05	oxidoreductase activity, acting on sulfur group of donors, NAD or NADP as acceptor	GO:0016668	18	96	CL201CONTIG2, LQ0AAB97YC16FM1.SCF, CL4512CONTIG1, CL5022CONTIG1, CL37CONTIG1, CL317CONTIG1, CL125CONTIG1, LQ0AAB41YN15FM1.SCF, CL845CONTIG1, LQ0AAB13YC19FM1.SCF, CL4847CONTIG1, CL2191CONTIG1, CL5294CONTIG1, CL5754CONTIG1, CL485CONTIG2, CL1310CONTIG1, CL6127CONTIG1, CL484CONTIG1,	0.000854
0.1	oxidoreductase activity, acting on the aldehyde or oxo group of donors	GO:0016903	25	94	CL4512CONTIG1, CL790CONTIG1, CL7099CONTIG1, CL2319CONTIG1, CL625CONTIG1, CL1325CONTIG1, CL1823CONTIG1, CL1204CONTIG1, CL5317CONTIG1, CL6089CONTIG1, CL930CONTIG1, CL5754CONTIG1, CL61CONTIG1, CL4897CONTIG1, CL2721CONTIG1, CL1186CONTIG1, CL568CONTIG3, CL5060CONTIG1, LQ0AAB33YB05FM1.SCF, CL1738CONTIG1, LQ0AAB31YB12FM1.SCF, CL3463CONTIG1, CL84CONTIG1, CL6192CONTIG1, LQ0AAA3YM20FM1.SCF,	0.0001185
0.1	oxidoreductase activity, acting on the aldehyde or oxo group of donors	GO:0016903	27	94	CL61CONTIG1, CL790CONTIG1, CL7099CONTIG1, CL4512CONTIG1, CL1325CONTIG1, LQ0AAB41YN15FM1.SCF, CL568CONTIG3, CL2250CONTIG1, CL5294CONTIG1, CL5754CONTIG1, CL4897CONTIG1, CL6192CONTIG1, CL1632CONTIG1, CL625CONTIG1, CL1823CONTIG1, CL930CONTIG1, LQ0AAA3YM20FM1.SCF, CL1396CONTIG1, CL1470CONTIG1, CL2319CONTIG1, CL1186CONTIG1, CL248CONTIG2, CL304CONTIG1, CL3651CONTIG1, CL5317CONTIG1, CL6089CONTIG1, CL3196…	8.351e-05
0.1	oxidoreductase activity, acting on the aldehyde or oxo group of donors, NAD or NADP as acceptor	GO:0016620	17	65	CL7099CONTIG1, CL2319CONTIG1, CL625CONTIG1, CL1823CONTIG1, CL1204CONTIG1, CL5317CONTIG1, CL6089CONTIG1, CL930CONTIG1, CL61CONTIG1, CL4897CONTIG1, CL2721CONTIG1, CL568CONTIG3, CL1738CONTIG1, LQ0AAB31YB12FM1.SCF, CL3463CONTIG1, CL6192CONTIG1, LQ0AAA3YM20FM1.SCF,	0.001735
0.1	oxidoreductase activity, acting on the aldehyde or oxo group of donors, NAD or NADP as acceptor	GO:0016620	19	65	CL61CONTIG1, CL7099CONTIG1, CL568CONTIG3, CL2250CONTIG1, CL5294CONTIG1, CL4897CONTIG1, CL6192CONTIG1, CL625CONTIG1, CL1823CONTIG1, CL930CONTIG1, LQ0AAA3YM20FM1.SCF, CL1396CONTIG1, CL2319CONTIG1, CL248CONTIG2, CL304CONTIG1, CL3651CONTIG1, CL5317CONTIG1, CL6089CONTIG1, CL3196CONTIG1,	0.0007258
0.1	oxidoreductase activity, acting on the CH-CH group of donors	GO:0016627	30	129	CL4049CONTIG1, CL1997CONTIG1, CL491CONTIG1, CL5022CONTIG1, CL640CONTIG1, CL484CONTIG1, CL625CONTIG1, CL5704CONTIG1, CL1204CONTIG1, LQ0AAB80YC06FM1.SCF, CL2791CONTIG1, CL3123CONTIG1, CL1495CONTIG1, CL4897CONTIG1, LQ0AAB40YC09FM1.SCF, CL5040CONTIG1, CL2940CONTIG1, CL3942CONTIG1, CL2485CONTIG1, LQ0AAB65YD19FM1.SCF, CL5060CONTIG1, CL6735CONTIG1, CL1738CONTIG1, CL3832CONTIG1, CL2191CONTIG1, CL485CONTI…	0.0003543
0.1	oxidoreductase activity, acting on the CH-NH2 group of donors	GO:0016638	16	51	CL2561CONTIG1, CL4512CONTIG1, CL5022CONTIG1, CL270CONTIG1, CL484CONTIG1, CL1091CONTIG1, CL5649CONTIG1, CL5754CONTIG1, LQ0AAB48YJ16FM1.SCF, LQ0AAB2YB07FM1.SCF, CL84CONTIG1, CL2669CONTIG1, CL3083CONTIG1, CL5255CONTIG1, CL1656CONTIG1, CL598CONTIG1,	0.0002631
0.1	oxidoreductase activity, acting on the CH-NH2 group of donors	GO:0016638	15	51	CL1656CONTIG1, CL4512CONTIG1, CL5022CONTIG1, CL270CONTIG1, CL2561CONTIG1, CL317CONTIG1, LQ0AAB41YN15FM1.SCF, LQ0AAB48YJ16FM1.SCF, CL5754CONTIG1, CL2669CONTIG1, LQ0AAB39YD12FM1.SCF, CL484CONTIG1, CL1091CONTIG1, CL1470CONTIG1, CL352CONTIG1,	0.002402
0.05	oxidoreductase activity, acting on the CH-NH2 group of donors	GO:0016638	12	51	CL1656CONTIG1, CL4512CONTIG1, CL5022CONTIG1, CL270CONTIG1, CL2561CONTIG1, CL317CONTIG1, LQ0AAB41YN15FM1.SCF, LQ0AAB48YJ16FM1.SCF, CL5754CONTIG1, CL2669CONTIG1, LQ0AAB39YD12FM1.SCF, CL484CONTIG1,	0.000792
0.1	oxidoreductase activity, acting on the CH-NH2 group of donors, NAD or NADP as acceptor	GO:0016639	7	15	CL2561CONTIG1, CL270CONTIG1, CL484CONTIG1, CL84CONTIG1, CL2669CONTIG1, CL1656CONTIG1, CL598CONTIG1,	0.001102
0.1	oxidoreductase activity, acting on the CH-NH2 group of donors, NAD or NADP as acceptor	GO:0016639	8	15	CL1656CONTIG1, CL270CONTIG1, CL2561CONTIG1, CL317CONTIG1, LQ0AAB41YN15FM1.SCF, CL2669CONTIG1, LQ0AAB39YD12FM1.SCF, CL484CONTIG1,	0.0002995
0.05	oxidoreductase activity, acting on the CH-NH2 group of donors, NAD or NADP as acceptor	GO:0016639	8	15	CL1656CONTIG1, CL270CONTIG1, CL2561CONTIG1, CL317CONTIG1, LQ0AAB41YN15FM1.SCF, CL2669CONTIG1, LQ0AAB39YD12FM1.SCF, CL484CONTIG1,	8.626e-06
0.1	oxidoreductase activity, acting on the CH-OH group of donors, NAD or NADP as acceptor	GO:0016616	38	183	CL4049CONTIG1, CL2028CONTIG1, CL491CONTIG1, CL790CONTIG1, CL434CONTIG1, CL7099CONTIG1, CL1542CONTIG1, CL7245CONTIG1, CL625CONTIG1, CL786CONTIG1, CL431CONTIG1, CL1204CONTIG1, CL505CONTIG1, CL2264CONTIG1, CL5317CONTIG1, CL5083CONTIG1, CL3123CONTIG1, CL6089CONTIG1, CL6408CONTIG1, LQ0AAB3YF22FM1.SCF, CL1495CONTIG1, CL930CONTIG1, LQ0AAB28YN11FM1.SCF, CL1565CONTIG1, CL1621CONTIG2, CL1114CONTIG1, CL2721…	0.000702
0.05	oxidoreductase activity, acting on the CH-OH group of donors, NAD or NADP as acceptor	GO:0016616	25	183	CL4049CONTIG1, CL2028CONTIG1, CL491CONTIG1, CL790CONTIG1, CL434CONTIG1, CL7099CONTIG1, CL1542CONTIG1, CL7245CONTIG1, CL625CONTIG1, CL786CONTIG1, CL431CONTIG1, CL1204CONTIG1, CL505CONTIG1, CL2264CONTIG1, CL5317CONTIG1, CL5083CONTIG1, CL3123CONTIG1, CL6089CONTIG1, CL6408CONTIG1, LQ0AAB3YF22FM1.SCF, CL1495CONTIG1, CL930CONTIG1, LQ0AAB28YN11FM1.SCF, CL1565CONTIG1, CL1621CONTIG2,	0.0005991
0.1	oxo-acid-lyase activity	GO:0016833	11	33	CL1050CONTIG1, LQ0AAB24YL08FM1.SCF, CL5627CONTIG1, CL6576CONTIG1, CL1691CONTIG1, CL6408CONTIG1, CL516CONTIG1, CL3542CONTIG1, LQ0AAB2YH21FM1.SCF, LQ0ACA17YC18RM1.SCF, CL6510CONTIG1,	0.003062
0.05	pantothenate kinase activity	GO:0004594	3	4	CL2522CONTIG1, CL7198CONTIG1, CL105CONTIG1,	0.001197
0.1	peptide disulfide oxidoreductase activity	GO:0015037	20	71	CL201CONTIG2, LQ0AAB97YC16FM1.SCF, CL4512CONTIG1, CL5022CONTIG1, CL317CONTIG1, CL125CONTIG1, LQ0AAB41YN15FM1.SCF, CL845CONTIG1, LQ0AAB13YC19FM1.SCF, CL4847CONTIG1, CL2191CONTIG1, CL5294CONTIG1, CL5754CONTIG1, CL485CONTIG2, CL1310CONTIG1, CL3927CONTIG1, CL6127CONTIG1, CL1773CONTIG1, CL1470CONTIG1, LQ0AAB89YC12FM1.SCF,	0.0008931
0.05	peptide disulfide oxidoreductase activity	GO:0015037	17	71	CL201CONTIG2, LQ0AAB97YC16FM1.SCF, CL4512CONTIG1, CL5022CONTIG1, CL317CONTIG1, CL125CONTIG1, LQ0AAB41YN15FM1.SCF, CL845CONTIG1, LQ0AAB13YC19FM1.SCF, CL4847CONTIG1, CL2191CONTIG1, CL5294CONTIG1, CL5754CONTIG1, CL485CONTIG2, CL1310CONTIG1, CL3927CONTIG1, CL6127CONTIG1,	5.35e-05
0.1	phosphoribulokinase activity	GO:0008974	3	3	CL7198CONTIG1, CL105CONTIG1, CL6800CONTIG1,	0.001864
0.05	phosphoribulokinase activity	GO:0008974	3	3	CL7198CONTIG1, CL105CONTIG1, CL6800CONTIG1,	0.0003154
0.1	proline-tRNA ligase activity	GO:0004827	6	12	CL2712CONTIG1, CL5561CONTIG1, CL2930CONTIG1, LQ0AAB5YI19FM1.SCF, LQ0AAB67YB22FM1.SCF, LQ0ACA13YP17RM1.SCF,	0.002757
0.05	proline-tRNA ligase activity	GO:0004827	5	12	CL2712CONTIG1, CL5561CONTIG1, CL2930CONTIG1, LQ0AAB5YI19FM1.SCF, LQ0AAB67YB22FM1.SCF,	0.001938
0.1	pyruvate dehydrogenase (acetyl-transferring) activity	GO:0004739	7	17	CL4512CONTIG1, CL790CONTIG1, CL1325CONTIG1, CL5754CONTIG1, CL1186CONTIG1, LQ0AAB33YB05FM1.SCF, CL84CONTIG1,	0.002666
0.1	pyruvate dehydrogenase activity	GO:0004738	8	19	CL790CONTIG1, CL4512CONTIG1, CL1325CONTIG1, LQ0AAB41YN15FM1.SCF, CL5754CONTIG1, CL1470CONTIG1, CL1186CONTIG1, CL3651CONTIG1,	0.002128
0.1	S-adenosylmethionine-dependent methyltransferase activity	GO:0008757	29	127	CL4049CONTIG1, CL5594CONTIG1, LQ0AAA10YD04FM1.SCF, CL1233CONTIG1, CL1753CONTIG1, CL4639CONTIG1, CL1437CONTIG1, LQ0AAB41YE16FM1.SCF, LQ0ADA1YC12RM1.SCF, LQ0AAB102YF18FM1.SCF, CL1781CONTIG1, CL664CONTIG1, LQ0AAB45YB08FM1.SCF, CL519CONTIG1, CL4176CONTIG1, LQ0AAB11YL10FM1.SCF, CL5379CONTIG1, CL1873CONTIG1, CL3466CONTIG1, LQ0AAB13YL16FM1.SCF, CL5895CONTIG1, CL2535CONTIG1, CL2007CONTIG1, CL6735CONTIG1,…	0.0006095
0.05	S-adenosylmethionine-dependent methyltransferase activity	GO:0008757	19	127	CL4049CONTIG1, CL5594CONTIG1, LQ0AAA10YD04FM1.SCF, CL1233CONTIG1, CL1753CONTIG1, CL4639CONTIG1, CL1437CONTIG1, LQ0AAB41YE16FM1.SCF, LQ0ADA1YC12RM1.SCF, LQ0AAB102YF18FM1.SCF, CL1781CONTIG1, CL664CONTIG1, LQ0AAB45YB08FM1.SCF, CL519CONTIG1, CL4176CONTIG1, LQ0AAB11YL10FM1.SCF, CL5379CONTIG1, CL1873CONTIG1, CL3466CONTIG1,	0.0008929
0.05	salicylate 1-monooxygenase activity	GO:0018658	4	7	CL4780CONTIG1, CL836CONTIG1, CL7CONTIG8, CL84CONTIG3,	0.001381
0.1	sepiapterin reductase activity	GO:0004757	6	13	CL7245CONTIG1, CL5317CONTIG1, CL6089CONTIG1, CL2721CONTIG1, LQ0AAB65YD19FM1.SCF, CL1738CONTIG1,	0.002732
0.1	serine-tRNA ligase activity	GO:0004828	3	3	CL2930CONTIG1, LQ0AAB5YI19FM1.SCF, LQ0AAB67YB22FM1.SCF,	0.002504
0.05	serine-tRNA ligase activity	GO:0004828	3	3	CL2930CONTIG1, LQ0AAB5YI19FM1.SCF, LQ0AAB67YB22FM1.SCF,	0.0005825
0.1	sigma factor activity	GO:0016987	6	11	LQ0AAB44YH03FM1.SCF, CL7308CONTIG1, CL5536CONTIG1, LQ0AAB40YE23FM1.SCF, LQ0AAA21YH07FM1.SCF, LQ0AAB100YF24FM1.SCF,	0.001556
0.1	single base insertion or deletion binding	GO:0032138	5	6	CL3414CONTIG1, CL4009CONTIG1, CL6232CONTIG1, CL7746CONTIG1, CL2058CONTIG1,	0.0002446
0.05	single base insertion or deletion binding	GO:0032138	4	6	CL3414CONTIG1, CL4009CONTIG1, CL6232CONTIG1, CL7746CONTIG1,	0.0006338
0.1	steroid dehydrogenase activity	GO:0016229	21	72	CL1542CONTIG1, CL7245CONTIG1, CL625CONTIG1, CL431CONTIG1, CL1204CONTIG1, CL505CONTIG1, CL5317CONTIG1, CL3123CONTIG1, CL6089CONTIG1, CL1495CONTIG1, CL1565CONTIG1, CL1621CONTIG2, CL2940CONTIG1, CL2721CONTIG1, LQ0AAB65YD19FM1.SCF, CL5060CONTIG1, CL1738CONTIG1, CL1251CONTIG1, CL4677CONTIG1, CL6192CONTIG1, LQ0AAA3YM20FM1.SCF,	9.912e-05
0.1	steroid dehydrogenase activity, acting on the CH-OH group of donors, NAD or NADP as acceptor	GO:0033764	19	65	CL1542CONTIG1, CL7245CONTIG1, CL625CONTIG1, CL431CONTIG1, CL1204CONTIG1, CL505CONTIG1, CL5317CONTIG1, CL3123CONTIG1, CL6089CONTIG1, CL1495CONTIG1, CL1565CONTIG1, CL1621CONTIG2, CL2721CONTIG1, LQ0AAB65YD19FM1.SCF, CL1738CONTIG1, CL1251CONTIG1, CL4677CONTIG1, CL6192CONTIG1, LQ0AAA3YM20FM1.SCF,	0.0002042
0.05	steroid dehydrogenase activity, acting on the CH-OH group of donors, NAD or NADP as acceptor	GO:0033764	12	65	CL1542CONTIG1, CL7245CONTIG1, CL625CONTIG1, CL431CONTIG1, CL1204CONTIG1, CL505CONTIG1, CL5317CONTIG1, CL3123CONTIG1, CL6089CONTIG1, CL1495CONTIG1, CL1565CONTIG1, CL1621CONTIG2,	0.001267
0.1	tetrapyrrole binding	GO:0046906	19	68	CL71CONTIG1, CL1CONTIG43, CL1CONTIG19, CL1CONTIG25, CL1CONTIG31, CL1482CONTIG1, CL1CONTIG10, CL1CONTIG2, CL1CONTIG16, CL1CONTIG9, CL98CONTIG1, CL43CONTIG1, CL27CONTIG1, CL73CONTIG1, CL162CONTIG1, LQ0AAB42YI07FM1.SCF, CL1CONTIG11, LQ0AAB21YJ14FM1.SCF, CL1CONTIG13,	0.001325
0.05	thioredoxin-disulfide reductase activity	GO:0004791	12	61	CL201CONTIG2, LQ0AAB97YC16FM1.SCF, CL4512CONTIG1, CL5022CONTIG1, LQ0AAB41YN15FM1.SCF, CL845CONTIG1, LQ0AAB13YC19FM1.SCF, CL4847CONTIG1, CL5754CONTIG1, CL1310CONTIG1, CL6127CONTIG1, CL484CONTIG1,	0.00403
0.1	transaminase activity	GO:0008483	20	48	CL2218CONTIG1, CL5376CONTIG1, CL3510CONTIG1, CL2492CONTIG1, CL6772CONTIG1, CL402CONTIG1, LQ0AAB60YI07FM1.SCF, CL6029CONTIG1, CL324CONTIG1, CL692CONTIG1, CL3013CONTIG1, CL968CONTIG1, CL1241CONTIG1, CL5691CONTIG1, CL352CONTIG1, CL4299CONTIG1, LQ0AAB43YF24FM1.SCF, CL2216CONTIG1, CL651CONTIG1, LQ0AAB50YM15FM1.SCF,	1.443e-06
0.05	transaminase activity	GO:0008483	12	48	CL2218CONTIG1, CL5376CONTIG1, CL3510CONTIG1, CL2492CONTIG1, CL6772CONTIG1, CL402CONTIG1, LQ0AAB60YI07FM1.SCF, CL6029CONTIG1, CL324CONTIG1, CL692CONTIG1, CL3013CONTIG1, CL968CONTIG1,	0.0004382
0.1	transcription initiation factor activity	GO:0016986	6	12	LQ0AAB44YH03FM1.SCF, CL7308CONTIG1, CL5536CONTIG1, LQ0AAB40YE23FM1.SCF, LQ0AAA21YH07FM1.SCF, LQ0AAB100YF24FM1.SCF,	0.002757
0.1	transferase activity, transferring alkyl or aryl (other than methyl) groups	GO:0016765	22	89	CL703CONTIG1, CL4049CONTIG1, CL5716CONTIG1, LQ0AAB49YA23FM1.SCF, CL6670CONTIG1, CL523CONTIG2, CL519CONTIG1, CL4176CONTIG1, CL1995CONTIG1, CL5248CONTIG1, CL487CONTIG1, CL4027CONTIG1, CL622CONTIG1, CL5895CONTIG1, CL523CONTIG3, CL2141CONTIG1, CL2936CONTIG1, CL760CONTIG1, CL5857CONTIG1, CL257CONTIG1, CL7495CONTIG1, CL523CONTIG1,	0.0008936
0.1	transferase activity, transferring alkyl or aryl (other than methyl) groups	GO:0016765	22	89	CL5857CONTIG1, CL257CONTIG1, CL6670CONTIG1, CL686CONTIG1, CL519CONTIG1, CL487CONTIG1, CL2179CONTIG1, CL703CONTIG1, CL1995CONTIG1, CL622CONTIG1, CL2936CONTIG1, CL7495CONTIG1, CL4176CONTIG1, LQ0AAB2YF15FM1.SCF, LQ0AAB57YP06FM1.SCF, CL760CONTIG1, CL5716CONTIG1, LQ0AAB30YP16FM1.SCF, CL4049CONTIG1, CL2767CONTIG1, CL2746CONTIG1, CL2280CONTIG1,	0.003226
0.1	transferase activity, transferring nitrogenous groups	GO:0016769	20	48	CL2218CONTIG1, CL5376CONTIG1, CL3510CONTIG1, CL2492CONTIG1, CL6772CONTIG1, CL402CONTIG1, LQ0AAB60YI07FM1.SCF, CL6029CONTIG1, CL324CONTIG1, CL692CONTIG1, CL3013CONTIG1, CL968CONTIG1, CL1241CONTIG1, CL5691CONTIG1, CL352CONTIG1, CL4299CONTIG1, LQ0AAB43YF24FM1.SCF, CL2216CONTIG1, CL651CONTIG1, LQ0AAB50YM15FM1.SCF,	1.443e-06
0.05	transferase activity, transferring nitrogenous groups	GO:0016769	12	48	CL2218CONTIG1, CL5376CONTIG1, CL3510CONTIG1, CL2492CONTIG1, CL6772CONTIG1, CL402CONTIG1, LQ0AAB60YI07FM1.SCF, CL6029CONTIG1, CL324CONTIG1, CL692CONTIG1, CL3013CONTIG1, CL968CONTIG1,	0.0004382
0.1	transferase activity, transferring one-carbon groups	GO:0016741	35	159	CL3333CONTIG1, CL4049CONTIG1, CL5594CONTIG1, LQ0AAA10YD04FM1.SCF, CL1233CONTIG1, CL1753CONTIG1, CL4639CONTIG1, CL1437CONTIG1, LQ0AAB41YE16FM1.SCF, LQ0ADA1YC12RM1.SCF, LQ0AAB102YF18FM1.SCF, CL1781CONTIG1, CL7068CONTIG1, CL664CONTIG1, LQ0AAB45YB08FM1.SCF, CL519CONTIG1, CL4176CONTIG1, LQ0AAB11YL10FM1.SCF, CL5379CONTIG1, CL1873CONTIG1, CL3466CONTIG1, LQ0AAB13YL16FM1.SCF, CL5895CONTIG1, CL2535CONTIG1,…	0.0003649
0.1	transferase activity, transferring pentosyl groups	GO:0016763	15	45	CL2751CONTIG1, CL5373CONTIG1, CL4639CONTIG1, LQ0AAB43YJ03FM1.SCF, CL4734CONTIG1, CL6029CONTIG1, CL7198CONTIG1, CL105CONTIG1, CL6800CONTIG1, CL6279CONTIG1, CL6929CONTIG1, CL3265CONTIG1, CL4509CONTIG1, CL5857CONTIG1, CL1691CONTIG1,	0.0001923
0.05	transferase activity, transferring pentosyl groups	GO:0016763	12	45	CL2751CONTIG1, CL5373CONTIG1, CL4639CONTIG1, LQ0AAB43YJ03FM1.SCF, CL4734CONTIG1, CL6029CONTIG1, CL7198CONTIG1, CL105CONTIG1, CL6800CONTIG1, CL6279CONTIG1, CL6929CONTIG1, CL3265CONTIG1,	3.146e-05
0.1	transferase activity, transferring pentosyl groups	GO:0016763	17	45	CL105CONTIG1, CL5857CONTIG1, CL5373CONTIG1, CL4639CONTIG1, CL4734CONTIG1, CL1335CONTIG1, LQ0AAB43YJ03FM1.SCF, CL1691CONTIG1, CL2751CONTIG1, CL6029CONTIG1, CL3265CONTIG1, CL1015CONTIG1, CL2190CONTIG1, CL6800CONTIG1, CL4509CONTIG1, CL6510CONTIG1, CL2746CONTIG1,	4.129e-05
0.05	transferase activity, transferring pentosyl groups	GO:0016763	10	45	CL105CONTIG1, CL5857CONTIG1, CL5373CONTIG1, CL4639CONTIG1, CL4734CONTIG1, CL1335CONTIG1, LQ0AAB43YJ03FM1.SCF, CL1691CONTIG1, CL2751CONTIG1, CL6029CONTIG1,	0.003362
0.05	trypanothione-disulfide reductase activity	GO:0015042	5	14	CL4512CONTIG1, CL5022CONTIG1, LQ0AAB41YN15FM1.SCF, CL4847CONTIG1, CL5754CONTIG1,	0.004255
0.1	tyrosine transaminase activity	GO:0004838	8	13	CL2218CONTIG1, CL3510CONTIG1, CL2492CONTIG1, CL6772CONTIG1, CL692CONTIG1, CL4299CONTIG1, CL2216CONTIG1, LQ0AAB50YM15FM1.SCF,	7.713e-05
0.05	tyrosine transaminase activity	GO:0004838	5	13	CL2218CONTIG1, CL3510CONTIG1, CL2492CONTIG1, CL6772CONTIG1, CL692CONTIG1,	0.002935
0.1	uracil phosphoribosyltransferase activity	GO:0004845	4	5	CL4639CONTIG1, CL7198CONTIG1, CL105CONTIG1, CL6800CONTIG1,	0.001032
0.05	uracil phosphoribosyltransferase activity	GO:0004845	4	5	CL4639CONTIG1, CL7198CONTIG1, CL105CONTIG1, CL6800CONTIG1,	0.0001011
0.05	uridine kinase activity	GO:0004849	5	12	CL4639CONTIG1, CL7198CONTIG1, CL105CONTIG1, CL6800CONTIG1, CL5248CONTIG1,	0.0007647
0.1	uroporphyrinogen decarboxylase activity	GO:0004853	3	3	CL2873CONTIG1, LQ0AAB22YF09FM1.SCF, CL4183CONTIG1,	0.001864
0.05	uroporphyrinogen decarboxylase activity	GO:0004853	3	3	CL2873CONTIG1, LQ0AAB22YF09FM1.SCF, CL4183CONTIG1,	0.0003154
0.1	uroporphyrinogen decarboxylase activity	GO:0004853	3	3	LQ0AAB22YF09FM1.SCF, CL2873CONTIG1, CL4183CONTIG1,	0.002504
0.05	very-long-chain-fatty-acid-CoA ligase activity	GO:0031957	5	14	CL2522CONTIG1, CL237CONTIG1, CL524CONTIG1, CL7097CONTIG1, CL3037CONTIG1,	0.004255
0.1	Y-form DNA binding	GO:0000403	4	5	CL3414CONTIG1, CL6232CONTIG1, CL7746CONTIG1, CL2058CONTIG1,	0.001513
0.05	Y-form DNA binding	GO:0000403	3	5	CL3414CONTIG1, CL6232CONTIG1, CL7746CONTIG1,	0.005122
0.1	zeaxanthin epoxidase activity	GO:0009540	4	6	CL4780CONTIG1, CL7CONTIG8, LQ0AAB4YL05FM1.SCF, CL6230CONTIG1,	0.002794

## Sheet: HyperUP
FDR<	Function	GO-ID	in set	total	genes	p
0.1	acyltransferase activity	GO:0008415	34	238	CL5609CONTIG1, CL2080CONTIG1, CL6701CONTIG1, CL748CONTIG1, CL5443CONTIG1, CL1171CONTIG1, CL317CONTIG1, CL352CONTIG1, CL1204CONTIG1, CL7509CONTIG1, CL2522CONTIG1, CL3037CONTIG1, LQ0ACA20YO06RM1.SCF, CL1162CONTIG1, CL1621CONTIG2, CL2333CONTIG1, CL5809CONTIG1, CL7742CONTIG1, CL697CONTIG1, CL7467CONTIG1, CL2674CONTIG1, LQ0AAB42YJ20FM1.SCF, CL1738CONTIG1, CL475CONTIG1, CL879CONTIG1, CL709CONTIG1, CL22…	0.0005371
0.1	agmatinase activity	GO:0008783	4	6	CL2037CONTIG2, LQ0AAB73YC03FM1.SCF, LQ0AAB28YG22FM1.SCF, CL2037CONTIG1,	0.0005267
0.05	agmatinase activity	GO:0008783	4	6	CL2037CONTIG2, LQ0AAB73YC03FM1.SCF, LQ0AAB28YG22FM1.SCF, CL2037CONTIG1,	6.375e-05
0.1	arginase activity	GO:0004053	4	6	CL2037CONTIG2, LQ0AAB73YC03FM1.SCF, LQ0AAB28YG22FM1.SCF, CL2037CONTIG1,	0.0005267
0.05	arginase activity	GO:0004053	4	6	CL2037CONTIG2, LQ0AAB73YC03FM1.SCF, LQ0AAB28YG22FM1.SCF, CL2037CONTIG1,	6.375e-05
0.1	C-acyltransferase activity	GO:0016408	8	25	CL5609CONTIG1, CL2080CONTIG1, CL2522CONTIG1, CL5809CONTIG1, CL475CONTIG1, CL709CONTIG1, CL915CONTIG1, LQ0AAB22YK20FM1.SCF,	0.0004948
0.05	hydrolase activity, acting on carbon-nitrogen (but not peptide) bonds, in linear amidines	GO:0016813	4	8	CL2037CONTIG2, LQ0AAB73YC03FM1.SCF, LQ0AAB28YG22FM1.SCF, CL2037CONTIG1,	0.0002762
0.1	oxidoreductase activity	GO:0016491	83	718	CL371CONTIG1, CL6230CONTIG1, LQ0AAB7YD09FM1.SCF, CL5436CONTIG1, CL203CONTIG1, CL4051CONTIG1, CL1249CONTIG1, CL1852CONTIG1, CL4901CONTIG1, CL491CONTIG1, CL1674CONTIG1, CL2275CONTIG1, CL789CONTIG1, CL3941CONTIG1, LQ0AAB27YN03FM1.SCF, CL317CONTIG1, CL352CONTIG1, CL674CONTIG1, CL5294CONTIG1, CL1204CONTIG1, CL2522CONTIG1, CL3361CONTIG1, LQ0AAB22YP19FM1.SCF, LQ0AAB5YJ23FM1.SCF, CL187CONTIG1, CL2833CONT…	0.0001983
0.1	structural constituent of ribosome	GO:0003735	29	164	CL4631CONTIG1, CL262CONTIG1, CL196CONTIG1, CL537CONTIG1, CL94CONTIG1, CL219CONTIG2, CL359CONTIG1, CL228CONTIG1, CL282CONTIG1, CL102CONTIG2, CL461CONTIG1, CL670CONTIG1, CL839CONTIG1, CL183CONTIG1, CL133CONTIG1, CL348CONTIG1, CL2383CONTIG1, CL130CONTIG1, CL155CONTIG2, CL117CONTIG2, CL202CONTIG1, CL1052CONTIG1, CL277CONTIG1, CL74CONTIG1, CL240CONTIG1, CL201CONTIG1, LQ0AEA6YM22RM1.SCF, CL117CONTIG1, …	3.156e-05
0.1	structural molecule activity	GO:0005198	35	231	CL4631CONTIG1, CL262CONTIG1, CL1639CONTIG1, CL196CONTIG1, CL537CONTIG1, CL94CONTIG1, CL219CONTIG2, CL359CONTIG1, CL69CONTIG1, CL228CONTIG1, CL282CONTIG1, CL102CONTIG2, CL461CONTIG1, CL670CONTIG1, LQ0AAB63YN23RM1.SCF, LQ0AAB98YA21FM1.SCF, CL839CONTIG1, CL183CONTIG1, CL133CONTIG1, CL348CONTIG1, CL2383CONTIG1, CL130CONTIG1, CL155CONTIG2, CL117CONTIG2, CL202CONTIG1, CL4400CONTIG1, CL1052CONTIG1, CL41…	0.0001397
0.1	transferase activity, transferring groups other than amino-acyl groups	GO:0016747	35	241	CL5609CONTIG1, CL2080CONTIG1, CL6701CONTIG1, CL748CONTIG1, CL5443CONTIG1, CL1171CONTIG1, CL317CONTIG1, CL352CONTIG1, CL1204CONTIG1, CL7509CONTIG1, CL2522CONTIG1, CL3037CONTIG1, LQ0ACA20YO06RM1.SCF, CL1162CONTIG1, CL1602CONTIG1, CL1621CONTIG2, CL2333CONTIG1, CL5809CONTIG1, CL7742CONTIG1, CL697CONTIG1, CL7467CONTIG1, CL2674CONTIG1, LQ0AAB42YJ20FM1.SCF, CL1738CONTIG1, CL475CONTIG1, CL879CONTIG1, CL7…	0.0003246

## Sheet: HypoUP
FDR<	Function	GO-ID	in set	total	genes	p
0.1	protein binding	GO:0005515	163	1193	LQ0AAB43YD10FM1.SCF, CL1096CONTIG1, CL5443CONTIG1, CL6575CONTIG1, CL4160CONTIG1, CL2124CONTIG1, LQ0AAB77YC24FM1.SCF, CL1831CONTIG1, CL2513CONTIG1, CL3921CONTIG1, LQ0AAB49YI21FM1.SCF, CL1681CONTIG1, LQ0AAB24YC23FM1.SCF, CL1189CONTIG1, CL1408CONTIG1, LQ0ADA11YH07RM1.SCF, CL5987CONTIG1, CL749CONTIG1, LQ0AAB94YE10FM1.SCF, LQ0AAB50YH05FM1.SCF, LQ0AAB92YB12RM1.SCF, CL4150CONTIG1, CL2043CONTIG1, CL3746C…	2.507e-05

## Sheet: OxiUP
FDR<	Function	GO-ID	in set	total	genes	p
0.1	acid-amino acid ligase activity	GO:0016881	29	152	CL1597CONTIG1, LQ0AAB49YG09FM1.SCF, CL7258CONTIG1, CL6608CONTIG1, CL6219CONTIG1, CL2545CONTIG1, LQ0AAA6YP08FM1.SCF, LQ0AAB40YG06FM1.SCF, CL2090CONTIG1, CL2891CONTIG1, CL709CONTIG1, CL1524CONTIG1, CL6885CONTIG1, CL3896CONTIG1, CL1840CONTIG1, CL481CONTIG1, CL1284CONTIG1, CL6618CONTIG1, CL6473CONTIG1, LQ0AAA19YK01FM1.SCF, CL373CONTIG2, LQ0ADA10YC17RM1.SCF, CL643CONTIG1, LQ0AAA8YC12FM1.SCF, CL4122CON…	0.0004779
0.1	cation binding	GO:0043169	82	580	LQ0AAB24YD07FM1.SCF, CL1046CONTIG1, CL2513CONTIG1, CL3720CONTIG1, LQ0AAB49YG09FM1.SCF, CL3746CONTIG1, CL4631CONTIG1, CL7258CONTIG1, LQ0AAB28YG22FM1.SCF, CL3284CONTIG1, CL3423CONTIG1, CL1831CONTIG1, LQ0AAB73YN23FM1.SCF, CL7109CONTIG1, CL6608CONTIG1, CL1593CONTIG1, CL6494CONTIG1, CL1450CONTIG1, CL7016CONTIG1, LQ0AAB76YM01FM1.SCF, LQ0AAB38YO04FM1.SCF, CL2771CONTIG1, CL5525CONTIG1, CL2465CONTIG1, CL3…	0.0006282
0.1	microtubule motor activity	GO:0003777	20	88	LQ0AAB56YO24FM1.SCF, LQ0AAB12YB04FM1.SCF, CL2031CONTIG1, CL4310CONTIG1, LQ0AAB76YM01FM1.SCF, CL6862CONTIG1, LQ0AAB15YC16FM1.SCF, LQ0AAB23YN21FM1.SCF, LQ0AAB23YI13FM1.SCF, CL1113CONTIG1, CL5378CONTIG1, CL6882CONTIG1, CL610CONTIG1, CL5146CONTIG1, LQ0AAB57YN11FM1.SCF, LQ0AAB92YA07FM1.SCF, CL3945CONTIG1, LQ0AAA8YO05FM1.SCF, LQ0AAB104YG17FM1.SCF, LQ0AAB81YK14FM1.SCF,	0.0003543
0.05	microtubule motor activity	GO:0003777	15	88	LQ0AAB56YO24FM1.SCF, LQ0AAB12YB04FM1.SCF, CL2031CONTIG1, CL4310CONTIG1, LQ0AAB76YM01FM1.SCF, CL6862CONTIG1, LQ0AAB15YC16FM1.SCF, LQ0AAB23YN21FM1.SCF, LQ0AAB23YI13FM1.SCF, CL1113CONTIG1, CL5378CONTIG1, CL6882CONTIG1, CL610CONTIG1, CL5146CONTIG1, LQ0AAB57YN11FM1.SCF,	8.576e-05
0.1	protein binding	GO:0005515	155	1193	CL4038CONTIG1, CL2513CONTIG1, CL1577CONTIG1, LQ0AAB8YD16FM1.SCF, CL3385CONTIG1, CL6894CONTIG1, CL1597CONTIG1, CL3720CONTIG1, LQ0AAB77YC24FM1.SCF, LQ0AAB49YG09FM1.SCF, CL1189CONTIG1, CL3746CONTIG1, CL2043CONTIG1, CL3921CONTIG1, CL4150CONTIG1, CL4631CONTIG1, CL7258CONTIG1, LQ0AAB12YB04FM1.SCF, CL1831CONTIG1, CL2883CONTIG1, CL4117CONTIG1, LQ0AAB94YF23FM1.SCF, CL1096CONTIG1, CL1593CONTIG1, CL2031CONT…	0.0001502
0.1	small conjugating protein ligase activity	GO:0019787	28	128	CL1597CONTIG1, LQ0AAB49YG09FM1.SCF, CL7258CONTIG1, CL6608CONTIG1, CL6219CONTIG1, CL2545CONTIG1, LQ0AAA6YP08FM1.SCF, LQ0AAB40YG06FM1.SCF, CL2090CONTIG1, CL2891CONTIG1, CL1524CONTIG1, CL6885CONTIG1, CL3896CONTIG1, CL1840CONTIG1, CL481CONTIG1, CL1284CONTIG1, CL6618CONTIG1, CL6473CONTIG1, LQ0AAA19YK01FM1.SCF, CL373CONTIG2, LQ0ADA10YC17RM1.SCF, CL643CONTIG1, LQ0AAA8YC12FM1.SCF, CL4122CONTIG1, LQ0AAB82…	5.188e-05
0.1	SNAP receptor activity	GO:0005484	5	7	CL3921CONTIG1, CL6982CONTIG1, CL4406CONTIG1, CL1149CONTIG1, CL499CONTIG1,	0.0001796
0.1	ubiquitin-protein ligase activity	GO:0004842	28	128	CL1597CONTIG1, LQ0AAB49YG09FM1.SCF, CL7258CONTIG1, CL6608CONTIG1, CL6219CONTIG1, CL2545CONTIG1, LQ0AAA6YP08FM1.SCF, LQ0AAB40YG06FM1.SCF, CL2090CONTIG1, CL2891CONTIG1, CL1524CONTIG1, CL6885CONTIG1, CL3896CONTIG1, CL1840CONTIG1, CL481CONTIG1, CL1284CONTIG1, CL6618CONTIG1, CL6473CONTIG1, LQ0AAA19YK01FM1.SCF, CL373CONTIG2, LQ0ADA10YC17RM1.SCF, CL643CONTIG1, LQ0AAA8YC12FM1.SCF, CL4122CONTIG1, LQ0AAB82…	5.188e-05
0.1	zinc ion binding	GO:0008270	61	355	LQ0AAB24YD07FM1.SCF, CL2513CONTIG1, CL3720CONTIG1, LQ0AAB49YG09FM1.SCF, CL4631CONTIG1, CL7258CONTIG1, CL1831CONTIG1, LQ0AAB73YN23FM1.SCF, CL7109CONTIG1, CL6608CONTIG1, CL6494CONTIG1, CL1450CONTIG1, CL7016CONTIG1, CL2771CONTIG1, CL5525CONTIG1, CL2465CONTIG1, CL6677CONTIG1, CL4430CONTIG1, CL7019CONTIG1, CL795CONTIG1, LQ0AAB14YE02FM1.SCF, CL3593CONTIG1, CL4790CONTIG1, CL3668CONTIG1, CL6055CONTIG1, L…	1.394e-05
