# Supplementary material for: Global expression analysis of the brown alga Ectocarpus siliculosus (Phaeophyceae) reveals large-scale reprogramming of the transcriptome in response to abiotic stress
Source: Genome Biol. 2009 Jun 16;10(6):R66. doi: 10.1186/gb-2009-10-6-r66 (PMC2718500; doi:10.1186/gb-2009-10-6-r66)
Supplement: Additional data file 6 — The first tab contains a graphical representation of identified groups of unknown stress response genes. The roman numerals on the left (I-VI) refer to the network graphs to their right, each representing a group of unknown stress response genes. In the network graphs, brown nodes represent sequences only found in E. siliculosus, while green nodes represent genes found in other organisms also. Edges represent the sequence similarity between two genes (e-value of the BLAST output). The cluster each gene was assigned to by the k-means clustering (Figure 5) is given in boldface. Furthermore, the expression profile of each gene in the three stress conditions (hyposaline-, hypersaline-, and oxidative stress) is given on the right. Yellow indicates that a gene was over-expressed in a particular condition, while black indicates no change, and blue indicates that a particular gene was repressed. The other two tabs contain additional information, such as corresponding genome equivalent, amino acid sequence, subcellular localization of each protein, the results of the transmembrane domain search, and the expression profile for both the genes shown in the first tab and the other stress response genes that could not be assigned to the different groups. [file gb-2009-10-6-r66-S6.xls]

## Sheet: Figure_Groups
group of unkown genes	sequence	cluster	expression profile
		(k-means)	hypo - hyper - oxi
	LQ0AAB80YM16RM1.SCF	F
	CL2139Contig1	B
	CL6322Contig1	E
	CL486Contig3	B
	CL3794Contig1	D
	LQ0AEA7YJ02RM1.SCF	C
	LQ0AAB89YE14FM1.SCF	B
	CL1365Contig1	D
	LQ0AAB37YE12FM1.SCF	D
	LQ0AAB70YC10FM1.SCF	G
	LQ0AAB3YG08FM1.SCF	G
	LQ0AAB10YI22FM1.SCF	G
	CL1378Contig1	B
	CL1378Contig2	C
	LQ0AAB45YC17FM1.SCF	C
	CL4126Contig1	C
	LQ0AAB68YD18FM1.SCF	F
	LQ0AAB52YD12FM1.SCF	E
	CL3409Contig1	F
	CL2433Contig1	C
	LQ0AAB90YJ21RM1.SCF	A
	LQ0AAA4YE01FM1.SCF	C
	CL197Contig1	E
	CL922Contig1	E
	CL438Contig1	E
	LQ0AAB74YN16FM1.SCF	C
	LQ0AAB78YO22RM1.SCF	B
	LQ0AAA14YO08FM1.SCF	C
	LQ0AAB71YH03RM1.SCF	B
	<-3 >+3
	log2-ratio

## Sheet: Details_Grouped_genes
group	sequence	genomic equivalent	length of protein (aa)	origin of blast hit	subcellular localisation	trans-membrane segments	protein domains			gene structure	mean of log2-ratios with control			SD of log2-ratios with control			genomic amino acid sequence (version 1)
											hyposaline stress	hypersaline stress	oxidative stress	hyposaline stress	hypersaline stress	oxidative stress
I	LQ0AAB80YM16RM1.SCF	Esi0096_0032	130	E. siliculosus only	signal anchor	2				4 exons, 3'UTR	-4.55558	-0.0959832	-0.449729	0.360077	1.10862	1.3373	MFFTLRWQGVASPSTTVRDSGHSKSCRKTPRRFLKRVSGCQQSRLLLALVMSVTVVGVAESNMLVDLPSGFKCMWYNLSHPVQFAVLLVMPALFLGVNRMFGMLDKAAYARLSRAVSAWMNEKRQVDQI
I	CL2139Contig1	Esi0096_0072	108	E. siliculosus only	other localisation	0				no intron, Long 5' and 3'-UTR	2.76048	2.08009	2.58374	0.382795	0.318038	0.3334	MVVLLYGVNRLFDKADEAVSTRLSCATAALLHERKLHDAPGIPKPPPETKPRLQERRCASSGDTGKPQCSGHGRGVSPLGHHQQQQLVHPHPETEIVDEGLGVPAQQ
I	CL6322Contig1	Esi0096_0082	87	E. siliculosus only	signal anchor	1				3 exons, long 5' and 3'-UTR, 2 introns in the 5'-UTR	-4.21052	-0.814298	-2.52075	0.6938	1.06152	0.170861	MLALVSAVHVDLVEGKWLIEFPSGFRCIWNDLPHGLQFAILFLMLGILYGVNRLFDKADQAMYTRLTCATAGLLNEKRHHHAPRLF
I	CL486Contig3	Esi0179_0010	201	E. siliculosus only	other localisation	2				4 exons, 5' and 3'-UTR, one intron in the 5'UTR	5.33369	0.241592	4.73398	0.761181	0.553352	0.609242	MRVPVVVHPEVPMACDAGSVSRPTGTSKDGSSWDGKIPPPKDGVREIASRPTIAAGSSGSRGGGHVVSLLALTFASAIKLGNMESNMLVELPSGFRCIWNNLPHLVQFAAIFLMMVLLYGVNRAFDKADDAMSTRLSRATAALLHERRHHHAPRPRLLLTTGDKVESAAVRDAAFLPERGHHAQRLGTREGTPALPPRVL
I	CL3794Contig1	Esi0266_0003	96	E. siliculosus only	signal anchor	1				3 exons, 1 exon in the 5'-UTR	0.985817	5.97069	1.41293	1.41479	0.395263	0.701811	MISKSKTREGRKRRPALRSDFATGARRAGLVEFPSGARCVWNDLPHPAQFAIIFLMLALLFGVHRIFGKLDNVAYARLSRAVTAWMNERRHAHQG
I	LQ0AEA7YJ02RM1.SCF	Esi0266_0006	158	E. siliculosus only	other localisation	2				4 exons, 5' and 3'-UTR	2.33175	0.953622	1.7298	0.242187	0.159317	0.321625	MCVPVIGPEVSMVCDAGSASRPTRLSRDESSRGGKIPPPKDGVREIASRPTTAAGSSGSRGGGRVVGLLALAFALPIKLCNVESKMLVELPSGFRCIWNDLPHIVQFVAIFMMLVLLYGVNRAFDKADDAMSTRLSRATAALLHERRHHHAPRPRVL
II	LQ0AAB89YE14FM1.SCF	Esi0093_0010	394	E. siliculosus only	other localisation	2				9 exons, 5'-UTR	3.034	1.1785	1.59178	0.345222	1.23586	0.368091	MRETSTVQPNSGGNSSYGRQGHGTCLRPTLFGMRRSCSECGRKKKRRCVKSRSPCKFSKRRWHLPKPPQQEGRPQRLHGDGTHGREPLLKATPPGEFATSGLLPMKRFRLSASPAIGLVGMQENTFLTDFFGCVGFLPLTTQRHIRETMVKMMASPASRRQSAAGTDCDEAPELNLLMGPSTCIFWCAVALGALVRGSPLESVSKYSELAQKALATSYPGPADLEVGKAWAILAYLYGFMGNLVLFQGYLALSDSFLTSSIEQGSADVLPVGFAEIVKHKDIANSSCGQWEKKSFCAQEQATPQLKEAATEVELYQYVAQSFRAFEQTVHVTASINSATAGDHLCQAASDGRSDTLLQSDHVLLPGEVANAMGTVSASGNFLDFEPLEEAVDR
II	CL1365Contig1	Esi0093_0012	551	E. siliculosus only	other localisation	3				11 exons, 1 intron in the 5'-UTR, 3'UTR	0.428665	1.33499	0.945278	0.313009	0.132238	0.342356	MLPLKRFRLTASPATGLVGMQENAFLSDFFGCVGFVPLTSHSHIRETMVKIMASPAPLQQSAIGGAFGGVGSMVRARCWNKASEKPQLPMDPSTCTFWCAIALGALAKGCPVESVAKYRHLAHEALTKSYPSSADAEVATAWAMLAYVYGFMGDLAKFQEYLALSESFLKSATAKRCTDTLPLGFAEVVLPVKIPNASCGQWETKSLDAEERVPPQLADVAAEGELYKYIAQSFKAFEQAFQQKAYKQSARDVETPGETEGHGESDRNRRRPSALLPGEISEAMGTVFGDRNLLVFEPLEEAVDRTLVFEKAAKGDRRATLERIGRCVEVFELYPGMCRCTISHHKAHIMLVCLAAIGDSSARAMYDRLRGSYNSFRPAGSLPVPPLEEWQGVGAFCDD…
II	LQ0AAB37YE12FM1.SCF	Esi0093_0056	392	E. siliculosus only	other localisation	2				5 exons, no UTR	-1.96789	4.16317	-1.20904	1.26524	0.448254	0.349819	MMIQINPAANEEDVFRFVAQSLEAFVQLVVAEACEKRAIRSCSSDDGPYEEDIGSASPHSNAPRAEEMSDAMVTGFKVGLLDFENLQEAVDRPNVRTGMGGFLINMNLVFHRAANGDAVGMVEKLGHCVEVLERYPGVCRCMLQWCHLVHAALAALAVMDDSRARGLYNRLREAYNPFRPPASLPAPPLEEWQGLAAFCDHFQCRLVAGVIASERLSAFTTPPDCSRNDASFQQAHLKKEGVPVVDEEHHSDIVWAGVTPEEATSSNMDALCSSGDKSMSSTSSWEWNHERALQASPTARLGPSSSHVHRRESSKRGIHGTDLFSNEVERCGEDVVSGVVAQFPDVGLTSPELREVDGTTQEAVDDAIAVADWLDTTHAMLDEISYKSPGI
II	LQ0AAB70YC10FM1.SCF	Esi0093_0059	411	E. siliculosus only	other localisation	0				5 exons, 3'-UTR	-3.48535	2.23916	-1.07072	1.77136	0.172677	0.243163	MHLGQGFAEIVHHKQTVKAYSGNLDPAHDDSLAARRQHLPEVNPAANEGDLFRYFSQSQTAFEELVFEKACEKSAARRHLSADEPCEEGRCDANPHGNVPQVEEVSDAMVIALKAGLLDFEHLQEAVDRNLAFQKATNGDTGGALERFGHCVEVFERYPGVCRCMILWCRMSHSLLGALAAIDDSRARELYNRLRDVYNPSRPASFLPAPPLEEWRGTSAFCDDFQCRLFDGIIASQAFSVFSSPPDCTSNYAGLQHEEDDVPVVDEERDGGIAWAGVIPKEVTGSVMVTPCSNGVKPVASPSSWALNQEPAPQTNPPAGSSPSTSHLHRELGRGGASGTAIFNSAVEGCGGGALSGLVGQVPGMSLAWQELRDADGFPDGTGDDTIAEADWLDVSLVM…
II	LQ0AAB3YG08FM1.SCF	Esi0093_0066	310	E. siliculosus only	other localisation	0				3 exons, no UTR	-2.22666	2.16641	-1.50615	0.969057	0.139921	0.775771	MAFEKACKDSAACEQSSDHEPCLENRGGVTPQGNPPQTEEVSDAMVAGLNDGLFDFGQLQEAVDRCHLAHGILGALATIDDSRAQGLYNRLQGVYNRFRPHAYLPAPPLEKWRGISAFCDHFQCRVNEGIIASQGMSAFSTPPVCASNYAGSQTKCKQGGSHIAVEEHHDNMVLAGVIPENATGAMMAAPCSNGDRPMASTSSWELLQDPAPRTDPPAGPSFSSSQVNCEPARAGRSDSDVSNSAVEGCGGGAVSGWVAHVPDMSLRSPELREVDGGAEETWNDKIPAADWLDVTHAMLGAIDDDGPAL
II	LQ0AAB10YI22FM1.SCF	Esi0093_0077	336	E. siliculosus only	other localisation	0				3 exons, no UTR	-2.76909	1.72482	0.33166	0.266133	1.45434	0.984087	MIQVNPVASEEDVFQYVSQSLVAFEQVVFAKVCEKRSTRGQWTDNEPCLENRAGSSAHGNVIQAEEVSDAMVAGLKDGLIEFEHLQETVDRCHLAHGTLGALAAIDDSRARGLYNRLRDVYNSSRHPSSLPAPPLEEWRGISAICDHFQCRLTEGVIASKAVGVFSTPPHCRSNCIGPQTTCKQEDSQIVVEEHDDIMVSAGVIPENATGAIMAAPNSNGDKPMACTSWWELNREPAPQTSPPAGPSLFSADLPGELVRGGASDTDVYGGAVEGCGGGVVSGLAGRVPDMSLTLPLLRDVDGGTEEIGDDTIAAADWLEVTHAMLDATDMKNPVP
III	CL1378Contig1	Esi0043_0112	417	E. siliculosus only	other localisation	1	PF00564	54277		2 exons, 5' and 3'-UTR	4.36774	1.92063	4.78299	0.830035	0.995902	0.542238	MTTSSIKINFQGASRDVNVPAPVTLASLQAVIAAAFDAELPVRSPGGEAAKDTDLSFTYKDPDGDDIVFDKDSELKLAMRLCPGSLEISAAGKEKKAAEMPDSEARLYKIAARNLREYNGVPSMTPPKLVKTLAFLKLNPQRLVKQGLAPKNLLPRMKAEAANNAKVSKVPLGDGKNNEDLAESVAAGMELMSLEDDKKEWNDGFVSVEPADTSSPDNDNEEKNDAVAPEVKKNLIHKAFIAGGIQLRPREVRPLLVALDVRPCRLAKLGLVDGKDLRAMLQAEKKTAHKRHGPGHGGPRGPTGGFARGPVGLIMRVCGGRPGPGAGGRAGPGAVPGAGPGAGPGGCAPEARGNVVQLGRGKMRAVGCGKPRVGMMMPRRCHPDAGMPPPPPAHMEHAR…
III	CL1378Contig2	Esi0043_0114	340	E. siliculosus only	other localisation	0				no intron, 3'UTR	2.1577	0.877265	2.11734	0.172234	0.202774	0.134845	MKAEAANNAKVSKVPLGDGKNNEDLAESVAAGMELMSVEDDKKEWNDGFVSVEPADTSSPGNDNEEKNDAVAPEVKKNLIHKAFIAGGIQLRPREVRPLLVALDVRPCRLAKLGLVNGKDLRAMLQAEKKVAHKRRGHDNNNDDTAALHQRRHHHRDYHRQQHRMAGRPHPFAPPPPPPPAHQEVGDAMFAARGGGGGGGRHGAPHRHGAPHRHGPAHLHGGAPHHHGPPPPMKRMMRGGRPHPFAPPPPPAHMEDDHEAPGGGGGGRRGGPLFHPAHQHYAEVFDEDEGGHPGFHPHHGPPRWMAIRRAHGGGGYGGGYVGVFGGGVGQQQRRDYYWG
III	LQ0AAB45YC17FM1.SCF	Esi0277_0037	611	E. siliculosus only	other localisation	0				no intron, 3'UTR	1.16556	0.294163	3.18939	1.36887	0.251897	0.38598	MTECVTNKSSCKHAGEPNPLLCKAAARNLREYHGVPSMTAGGLEKTMVLLQLRPGRLVAQGLAPKHLLEGKKAADDADADNTDSSSTTSSGSEVEPEQADNQVSDDSNSNSSDGSDTEHDNIATQDSIGIEAGASKHPIHAVFVAAGVQLRPREARPLLRALGLRPHRLVKLGLVQWEELRRSRPGGRRGGPSHQQPGRLGGRGHHHHRGGGGMGRPRAPPPHGPPPHRHGHGYGHGRRPAHGDHRRSSSPTHGPPRGQFEEYRGLHLHHGPGHHHHGGESEEGEEEMAMMQAGPRVPPHGMHPPPHLREQHGGPRPHGMPMHDRQMHPHHGPGHHHHHHHGGESEEGEEEMAMIQAGPRGPPHGMHPPPHLREHHGGPRPHGMPMHDRQMHPHHGPGH…
	LQ0AAB11YF04FM1.SCF	Esi0025_0108	1060	E. siliculosus only	other localisation	0	IPR011050	IPR008979		23 exons, 3'-UTR	1.46526	-5.57005	0.171712	2.40786	0.37064	0.671673	MFKGDERTRTLEINIDNLPYTVWTSSGTTTGFETIEVDTMGRWIEIVGVLEDSEWLSIMEVEILVDDGVTDTDDVVDTTEVEAGSLGTVTATSALFDPSLGDSNGCDPAGCTAELTRDGDVSDESRWSCAPSLGGTCSISYDLGAVYDLSELRLALYNGATRVRTVDVTVDGSLATTWTSSGTTDGFESIDLSGYSGQDITVTGVLDNSEWLSIKETEIMVLSDGVVSPPSPSTTTPAPVFAPVATPNPTVATPEQLFSAKEIGTQDTTVTTTADLFDPDLAVDNGCDPAGCTGALTRDGDMTDTSRWACAPSLGGVCSISYDLGREFGLDELRVALYNGDIRVRTIDVFVDGALVTTWTSSGTTDGFESIALPDTASGTVIELQGVLDDSEWLSIIET…
	LQ0AAB45YF20FM1.SCF	Esi0047_0032	468	E. siliculosus only	other localisation	1				3 exons, 3'-UTR	-4.1141	-1.31437	-0.662329	0.471323	2.21661	0.782565	MTSDSTVPATEPPTAADAAVPDPIAAGTPGPVAAPVPAPTATPEAAAPTAPTAVEAGEVTTVTVTTNAFDARTDDDGCAPDGCTGENTRDGDLTDNSRWSCSAGLVEAAGGAAGEECQVMFELGEAQLVTSVSVAFLKGDTRTRTLNINVNGELFEVVTSGGTTSGLETFELDGGAGAPGVLSLGMESSGLTADEFLSIIEVEIAVGDSTVASSAAASETPAPVALPTPASVASETPAPMALPTPGPIIAPTESPVPAPAPTPLVVAVDTPAPSTSAVTPPASTSDPTPAPTSSARDVDITPSPATELATVGSGPSSEDTTTVTSGIDALYSSTGDCTSCIYDEECSECLSADGFNDENAVEYSECIQETFTTTVDITDFDQCEYMLAVYCCLSSASEN…
	CL2608Contig1	Esi0009_0089	654	E. siliculosus only	other localisation	2	53474	PS50187	PTHR11614	10 exons, 3'-UTR	3.12133	2.3496	2.87325	0.210659	0.457411	0.495811	MGAKTTAGDVNGKSNEMKSLAVSYMGVPLHFLASLVWAAVSRLLTMFRPREQTGAGFNKPVSPAPQQPLVRLNNLPQSEEYFINERGRVIHFRSYLPQSADEIKAVVLFSHGYGAHCNSPRKHQMGMSMPEKGLCMYQMDLEGHGYSGGERAYIEDYNHWVDDYRQLLELVAGDRIDTSRGGPSRAGDEAAGVVPHVLTATAAQRKRLQEVPFFVAGESLGGALSILLGLSLHESNHSLLPRFKGQVLLAPAIKGNPPPAMLVAALRHLVVPLVPRWQIPSCLESVNRPEMCVLEVDERRHANHDVLGYPGGLGWGGNMRFRTGLNLIDLTAEVSRRLEHVKFPFLIMHDPEDSIVRFDSSKELTYRASTPHGSPRGRELRPMKGWLHCLLTNCPEIAI…
	CL6590Contig1	Esi0022_0069	50	E. siliculosus only	other localisation	0				2 exons, 5' and 3'-UTR	1.965	0.235588	1.8296	0.308849	1.05478	0.255891	MEKAATPKDDPRARELKEMDGWLHDLLTNCPDLIIGHLTDWIVYQINRA
	CL13Contig16	Esi0236_0022	127	E. siliculosus only	other localisation	0				no intron, 5' and 3'-UTR	3.97972	1.24237	3.158	0.364869	0.481864	0.633883	MNPAQQRKPAKQRRTPGSKNWSINERVAARMEQQLMEEKLAKKMAEMEVRHRAERQRSEDLRRGNEEQEAPHQQEPGGPTPNPSADDLADAIATAMAGRLQTSSGDIGAVPHPATLRMTESRRIEL
	CL13Contig20	Esi0040_0039	78	E. siliculosus only	other localisation	0				no intron, 5' and 3'-UTR	2.92626	1.24384	1.81425	0.119171	0.108112	0.598972	MATRREDESRPAAEARQAAEDARIEELVNERVAARMEQLMEEKLAKKMAEMEVRHRAERQRSEDLRRGNEEQEAPHQ
	CL2176Contig1	Esi0042_0030	476	E. siliculosus only	signal peptide	2				3 exons, 5' and 3' UTR	1.15382	0.030742	1.29116	0.463145	0.415085	0.131626	MTSNPGGRAMVVALLACLASVVLAAPVYPRDPHLDWSEWDAPPASHLKDDPAKSTMDGGGRQHVDDAGVRRLERLGKDAMEYIASKYSFHLIGDSTSRRLGESFVSIFTGRGSIHRIAQRDRDFSSGNLKVHFYWAPLCSGPESVGAMLASVMDAVRAAKDGKRAVIITAYGVHDAFELHHAANGHGSPSYKSALPQDVVEKDGMRAAALGACRDTTTQLVRAAAATAVPGTEAPPVEEEQSPGDGRRQLPNVSTKVEVGPHETSEKQAAGIPPHNVRGGSVGAGNEDTLLGASAPPAASGPLQPLLFLMQNNRYPPGSVENAFQEDLHIIQRQVVGEWEASEGSKGDGGERGLFLVDNSVGLYGNLSCYRNANPIHFDEPVKLMEGKMLWDLLVLVDN…
	LQ0AAB15YG01FM1.SCF	Esi0042_0137	439	E. siliculosus only	signal peptide	0				3 exons, 5' and 3' UTR	-7.37048	-1.14496	-5.05248	0.153237	0.7832	0.80718	MRLSRLPLISGVLTGSTLVCFPSAVPAESTQPDHLTLDWSEWIDPPVAPVTDNWATSSMEELLTTPCVDAAQTGGCHQLRPAQVRTLVHDCARRLKVAGDLCGHSETPVVEDDYRLPHMESGVLPCGFEERTPNEVLEDMASKFTFHFIGDSTIRRLGESFVSIFTGQGSKHDMVHSDLDFSTGNLETRFYWAPFCFGSESVGAKLATVMDGVKTAKRGDKRTVIITAFGVHDSYELPLLVKGSASTSYMDALPPDFVDNGSVRTATLGACQATTAQLVQAAAAKVMAWADPTAEKGQWSKAVHASPNTTTRSTTETNGVSFSFGAPGTTAATDPTPPLVFLMQNNRYPPNSPEDNYLEELRRIQRGEVQEWEAGEGNEDAEGGIYLVDDSVSLFRNLS…
	CL13Contig10	Esi0016_0121	72	E. siliculosus only	other localisation	1				no intron, 5' and 3'-UTR	3.61106	0.90733	3.12631	0.49892	0.923472	0.582244	MAVAIASARSSAEGLGVGPQVLAGVVPLVPHFLAGDLLISAARLDAVPPSRPSSWPVSPPSAAPSELLLSR
	LQ0AAB79YN05FM1.SCF	Esi0100_0008	80	E. siliculosus only	other localisation	1				no intron, 5' and 3'-UTR	3.97955	1.21332	3.24504	0.40376	0.741081	0.779642	MKSGGDRPWQSQSRWPDRLRKGWVLGPQVLAGVVPLVPHFLAGDLLISAARLDAVPPSRPSSWPVSPPSAAPSELLLSR
IV	CL4126Contig1	Esi0061_0046	1212	Dictyostelium discoideum	other localisation	1	PF05725	52058		8 exons, 3'-UTR	1.12067	0.300935	0.611711	0.107297	0.238114	0.400124	MGPASSDGAPTDGGGGDSRKTGVAAVRVIDPPDGGGGGGGDAPPVPAGPGPAAAADAAVRCASPGDSGGGGGGGGGAPPPGGGLDGEAEPEAARGAVDGGDAGRSGEGGAAAAAVAEASGAGVGDGVVEAVASGGHVPDAGVGVGASTQAGHADAAALIPEHGPGGGQGVSPPEAEGEVGATPPAEPVARPMPAAADGAAAGVDDGSGGSRGGSDSKGGAEKRVGLEEEEEERGNSRQARGQDSPGRPPEAAAVAAAADDAAAQGEEDPAGPPPEEGNGSGQQSDGTDGVGPEEGARTLDQGEREEDEAGGGASSSTGDESAAVVGESGGSAESSVPVVEEGGGGGGGGTEQEDGSSSSPAEGPAGSAEGVPPDSSDLEVEAAAVVVATGDGEEEEKEE…
IV	LQ0AAB68YD18FM1.SCF	Esi0103_0044	325	Dictyostelium discoideum	other localisation	0	PF05725	52058		5 exons	-0.414959	-2.95706	-0.604027	1.62873	0.410072	1.03597	MEGDASSESAGPDEWGSAVVSGDATKLAELVLVWSGSKPERALSILRDCVALLEKEVEFSAPPFPAVPSRPTTPGHKRNSCLNALVVALDETCDGKRWYTSTKELQLASIEFCIACRKHQTLHLIVDTGIPRRLLAAADTAPSHPKRLFRTRVPRLRARRVSWHMPTAAELRKPIFAMTDVSCLEFGDAFEGGLEAVSWPQRLKTIEFDATSAFNKPIDLVQWPASLQRLAFGGMFIQPIEGAKFPSSLQELTFFAGFNQPIAGVILPSSLQNLHLGLNFDHPIEDVAWPQSLRKWRGRRHWRSLRSEGVSTSRLKAFCGQIRF
IV	LQ0AAB52YD12FM1.SCF	Esi0141_0033	391	Dictyostelium discoideum	other localisation	0	PF05725	52058		no intron, 3'-UTR	-5.4368	-4.05464	-5.31732	0.253953	1.42702	0.620309	MLSEASKDAFTKLECLSFSDAVERSGDRFDGVTLPRGLKSVVFGRWCYQHVDKVLWAASLKQITFGNTFNRSIKRIVWPTSLERVVFGWNFNQPVEGVHWPASLRQLNLGECFNHPVEEVAWPSSLEEIVFPGSFDQPITRVKWPASLRHLKFGSGFNQPIHQVSWPGSLKKLVFSEKFNQPIHLVSWPTAVEVMSLGLMFDQPVNEVSWPASLKQLVISGRFNQPIHLVSWPTSLEKMRIGLLFDQPISEVSWPASLEELQFLGKFNQPIHLVSWPTSLKKMVFGNSFDQPINEVSWPASLKELQFQGKFNQPIHQVSWPTSLEKMFFGNSFDQPINEVLWPASLKELVITGKFNQPLHQVRWPTSLEKLVLGDAEATPLSTKFNQLRS
IV	CL3409Contig1	Esi0161_0007	730	Dictyostelium discoideum	other localisation	1	PF05725	52058		2 exons, 3'-UTR	-2.85517	-3.39811	2.3718	2.00896	1.53784	0.320068	MLSRVPGHGRWLDAFTVVLSQNHSGGAGWLASTSELRLISFQSCVEFRNFSRLALRVSSDTPKHLWAADGATDAALPRDRAHETVSSATNVPPFRVVKATWLLPTSALRHTGPAFAGLEELFLGSFKFRSSAVVWPRGLKKLEFTARFNSTLENFSWPVSLEEVVFGICFNLPIDKVSWPASLRRITFGHGFNQRVDKVRWPVSLERLTFGNNFGTRLCVGWKQLEDPTQSMEKVVWPASLQELTFGWGFNQPIDGSVWPDSLQQITFAHSFNSPINKVLWPVSLRWISFGSSFNQRIDLVMWPASVEQMTFGDHFDAPIRSVAWPASLRQLTFGSHFNQPIRGSVLPDSVQQLSFGQCFNQDVDGFAWPRSLQRLTFGYNFDQPICRSVLPDSLQQLD…
IV	CL2433Contig1	Esi0280_0040	170	Dictyostelium discoideum	other localisation	0		52058		no intron, 1 intron in the 5'-UTR, 3'-UTR	1.10283	0.683759	0.422972	0.178414	0.133966	0.099618	MWPASLQQLSFGAMFNQPIAGVVWPASLQQLSFVIFNQPMAGVVWPVSLQQLSFGWFNQPIAGVVWPVSLQQPSFGWKFNQPIAGVVWPASLQQLSFRAMFNQPIAGAVWPASLQQLSFGAMFNQPMAGVVWPASLQQLAFGSSFDQPFPRVTWPRSLRHLMCGREKLL
IV	LQ0AAB90YJ21RM1.SCF	Esi0331_0008	333	Dictyostelium discoideum	other localisation	0	PF05725	52058		2 exons, 5' and 3'-UTR	1.23208	-1.51175	0.103734	0.0511998	1.91126	0.354585	MSPPAVVRESASSGSKLRQDALDIALNQVSGGKGWYTSKLQLQLASLQLCLAWRRVPTSHLTVERDVLALLWPNSVAEATRSRAVSLGQSHLPALRPRKVTWNLAALSMRHCGNAFESVDVLVFGDSFDYRVDRVTWPPGLKKLIFGKDFDRSVDHVAWPRSLKQLTFGAWFNKPIGSVSCSDSLQQITFGTCFNQPVEDVTWPASLQELTFGKEFNQPIQGVTWSASLLNLTFGRYFNQPIDRVMFPASLRHITFGFSFDQPIIDVLWPVSLKRLVFGYWFNQEVQEVSWPASLEELSFGIKFQVPVDGIDWPDSLQRLTIAQRPGMLLHT
V	LQ0AAA4YE01FM1.SCF	Esi0027_0108	258	several species	other localisation	0	IPR013994	PF01822		7 exons, 3'-UTR	3.47251	-0.512437	2.06812	0.270508	1.66462	0.356148	MWELPPLKPAKSSRGRFKRLAVTCAKKTPLATTACLRAPTALRRQPPAGAPSSVKVPCSGPSTATGFTPDSLGCYEDDREDRILDDLALSDDSMTTELCELTCLGSTYFATQYGRECWCGSAGMDYALHGESTDCTYGCAGNADQTCGGFDAANVYRYTNESTPTSSFVGCYQDESDARMMELALTDSSSMTKEMCEAECTGNRYFGMQYGSECFCGGSSTNLLENGESSACDYECPGDSEQECGGFYAMSVYSYYS
V	CL197Contig1	Esi0106_0009	475	E. siliculosus only	signal peptide	1	IPR013994	PD007878	PR002889	12 exons, I intron in the 3'-UTR	-4.57563	-1.42713	-2.67718	1.45423	0.299169	0.338997	MKMQLLSLALPMLLLGVAVGQSDDPSYLGCFSDPADSRVFDTQYSDSAMTAAVCSVLCASSAFYGTQYSSECWCGDNVDYDANGEGVCDMACSGDSSQTCGGFYAMSVYENPDDSGYLGCYSDPADSRIFELVATSDDMTSECWCGDNADYDANGAGECDMACSGDASEICGGFYTMSVYENVDPVDPSYLGCYSDPADSRIFELVATSDDMTSEICLGNCGAYQYYGTQYSTQCWCGDNADYDANGAGECDMDCSGDSSEICGGFYSMSVYENDVDPVDLSYRGCYSDPADSRIFVEAGSSDGMTAEFCATLCSDYAFYGTQYSTQCWCGDLNARYSENGEGVCDMPCSGDSEETCGGYYSMSVYAHDPAYLGCFQDSAGRIMYYSYESDSMTADACA…
V	CL922Contig1	Esi1541_0001	203	several species	other localisation	0	IPR013994	PF01822		5 exons, no UTR	-4.24785	-4.04739	-1.8039	0.458523	0.796322	0.662034	MDCAGNTAETCGGFDALTLYEIASEAPPTPAPFTPPGPTPAPASPVVPSGDYDFVGCVADSQSSRVMPVGPLAEDVMSAEICFGICSAQDDSNTHFGTQYGEECWCTGSLGTTETSSACTMDCAGNSAETCGGFDALSMYEIVADTSSPPTPAPTLPVPPTPAPASIVSDDYEVIGCVADNQAARVMPVGPLAEDTMSAEVG
VI	CL438Contig1	Esi0007_0082*	195	several species	other localisation	4				no intron, 5' and 3'-UTR	2.8702	-0.0290008	0.854118	0.376232	0.833204	0.418333	MEERQRQMDDRIRPDAGAVVVSPGDVNDGPATTADKALSALPYMLPLADGVVFAAHLFGAFPEQTAWAQPLAAVLLALRSVPFATLIGFFSLSIGSSNPQINKLVRFNMQQAINLDIALILPGVVGAITGAVLGSDASKLAPLANVGSDVVFVALLAAVAYSVGTSATGSFPNKLPLLGRLNRENPDNQEGGEE
VI	LQ0AAB74YN16FM1.SCF	Esi0007_0084	414	several species	chloroplast	5	47473	IPR002048		2 exons, 5' and 3'-UTR	2.97713	-1.35368	0.724226	0.220951	2.43395	0.765952	MAPITATIVPLVTLFVGSTTAFVTPTGRGASWSLANPQHAVRSSTSAVATRHNARRRSSARPATSSLRMVSEVAEQRAAKLRETAAAFRAEAAELEQKQARERRENAQRSFNTFDSNKDGSVDVAELKAGLEGPLRRSFTKTLQARMGRKPSKEEVDDRIAGLPGGTLFPDDLALKLIQTYDQNGDGLLQQSEFAPTEELRTRLENLFSQQREEERVARMEERQRQMDDRMRPDAGAVVVSPGDVNDGPATTADKALSALPYVLPLADGVVFAAHLFGAFPEQTAWAQPLAAVLLALRSVPFATLIGFFSLSIGSSNPQINKLVRFNMQQAINLDIALILPGVVGAITGAVLGSDASKLAPLANVGSDVVFVALLAAVAYSVGTSATGSFPNKLPLLGR…
VI	LQ0AAB78YO22RM1.SCF	Esi0007_0086	401	several species	chloroplast	4	47473	IPR002048		2 exons, 5' and 3'-UTR	4.30854	1.8213	1.1972	0.372517	0.0783798	0.391843	MAPITATIVPLVTLFVGSTTAFVTPTGRGASWSLANPQHAVRSSTSAVATRHNARRRSSATPATSSLRMVSEVAEQRAAKLRETAAAFRAEAAELEQKQARERRENAQRSFNTFDSNKDGSVDVAELKAGLEGPLRRSFTKTLQARMGRKPSKEEVDDRIAGLPGGTLFPDDLALKLIQTYDQNGDGLLQQSEFAPTEELRTRLENLFSQQREEERVARMEERQRQMDDRMRPDAGTVVVSPGDVNDGPATTADKALSALPYVLPLADGVVFAAHLFGAFLEQTAWAQPLAAVLLALRSVPFATLIGFFSLSIGSSNPQINKLVRFNMQQAINLDIALILPGVVGCDHGGGCWGPTRPSWRLWRTRVRTWCSWLCWRLWRTPLALRRRDRSRTSSHCWGG
VI	LQ0AAA14YO08FM1.SCF	Esi0007_0087	414	several species	chloroplast	5	47473	IPR002048		2 exons, 5' and 3'-UTR	3.5587	-0.969675	1.40297	0.269203	2.67373	0.460475	MAPITATIVPLVTLFVGSTTAFVTPTGRGASWSLANPQHAVRSSTSAVATRHNARRRSSARPVTSSLRMVSEVAEKKAAKLRETAAAFRAEAAELEQKQARERRENAQRSFNTFDSNKDGSVDVAELKAGLEGPLRRSFTKTLQARMGRKPSKEEVDDRIAGLPGGTLFPDDLALKLIQTYDQNGDGLLQQSEFAPTEELRTRLENLFSQQREEERVARMEERQRQMDDRMRPDAGAVVVSPGDVNDGPATTADKALSALPYVLPLADGVVFAAHLFGAFPEQTAWAQPLAAVLLALRSVPFATLIGFFSLSIGSSNPQINKLVRFNMQQAINLDIALILPGVVGAITGAVLGSDASKLAPLANAGSDVVFVALLAAVAYSVGTSATGSFPNKLPLLGR…
VI	LQ0AAB71YH03RM1.SCF	Esi0214_0021	340	several species	other localisation	4	47473	IPR002048		2 exons, 5' and 3'-UTR	6.8613	3.16259	0.0179108	0.943265	3.16995	1.76177	MPATSSLRMVSKVAEQKAAKLRETAAAFRAEAAELEEKQARERRENALRSFNTFDSNKDGSVDIAELKAGLESPLRRSFTKTLQARMGRKPSKEEVDERIAGLPGGTLFPDELALKLIQTYDQNGDGLLQQSEFAPTEELRTRLENLLSQQREDERLARLEERQRQMDDKMRPDTGAVVVSPGDVNDGPATTADKALSALPYLLPLADGILFAAHLFGAFPEQTAWAQPLAAVLLALRSLPFATLIGFFSLSIGSSNPRVNKLVRFNMQQAINLDIALILPGVVGAITGGMLGADAVKLAPLSNAGSDVVFVALLAAVAYSVGTSATGRSRTSFRCWGV
	CL4901Contig1	Esi0072_0053	289	several species	signal peptide	1	IPR012336	PF01323	IPR006662	4 exons, 3'-UTR	1.7449	3.04066	1.01146	0.605194	0.39655	0.345233	MGLWCALHILLCIGFLLNECVGLVLFPCRATLRLDMSAAASSSVRDADSVRVQVVSDFACPWCYVGKARLGAAIEAFERSSTSDGKGRARVQVSFSPYMIDPRTQPGGEEYLVYNKRRWGGDGWTASLKRSSKKDGCDFAKWETWPNSLLAHRLQKFADSAGKGDQVNSLVFQTIYERGGNASDLETLVSLAAEAGLSPAEASAYLSSREGEEDVLQDDHTAKTELGVTGVPCFIVRGTGGRESGSGTPDDAVGGGSVGGAGQSEIVLNGAVAPDKLLRAFESVRRLG
	LQ0AAB68YN02RM1.SCF	Esi0192_0049	141	several species	other localisation	0	IPR012336			2 exons; 2 introns in the 5'-UTR, 3'-UTR	3.14339	0.175682	2.73334	0.498849	1.05237	0.760557	MAASLAMAGEATGIRFDNDRKVHNTIRSHRLVRFADGQGKGGEMIDQLFHAYFEQGRNIADVDVLLELAEKAGVECTKDYLEGKEGQQAVISEYKHGVHNHGISGVPYFIVSREGSKATVPLSGGQPPAAFVEAFEALSS
* This gene should be considered together with Esi0007_00083, which contains the domains present in the other genes of this group

## Sheet: Details_not_grouped_genes
sequence	genomic equivalent (version 1)	length of protein (aa)	origin of blast hit	subcellular localisation	trans-membrane segments	protein domains			gene structure	mean of log2-ratios with control			SD of log2-ratios with control			genomic amino acid sequence
										hyposaline stress	hypersaline stress	oxidative stress	hyposaline stress	hypersaline stress	oxidative stress
LQ0AAB22YI22FM1.SCF	Esi0520_0001	59	E. siliculosus only	other localisation	0				no intron, no UTR	-3.50964	-1.72266	-2.98079	1.35499	0.687824	0.39773	MMKHRPSPANEGVPCPSGRTRAGKGWQTTVRRSTSPQSADPFPPSIALSLEVHPIHGRA
CL1403Contig1	Esi0370_0005	159	E. siliculosus only	signal peptide	3				2 exons, 5' and 3' UTR	1.38709	0.403922	1.3457	0.219069	0.327216	0.160295	MGSPRLAAPQSRASTVLALPLLAAALVLVCASLLPAGAEAMGPNDDGAANNLGLLAQACASSFCGLGVDALDLWLSLEEVCRTGASNQPSLEGGGEMEFGGVHGGGWGTAAAEGGGRGGDWSASSTALVCGGVLAVSALVGFRSGIKVGTWTKEGYPVA
LQ0AAB27YJ18FM1.SCF	Esi0555_0002	489	E. siliculosus only	other localisation	4				2 exons, 3' UTR	-5.72398	-0.91815	-2.35622	0.805569	0.713026	0.941814	MVVCYSMSLMLASVSLEIRRFMIVRGKQDAIIQDEDFKSMWDVFKSSKTRRWTTLAVLPVLLGGAASMVIDFTTSGVSASIGHTEGAEVPVLGLVGSDVSDIPSFPTINSLVEAAETGTSMETAYLTLLSSDLASIGFGSNFSDVEVRHEYKVNPVGTGSEQGVYVFGNKYDTPETVDITFCVEVSEIEGDAFAISECREGLIVDKSVKSFYVKSVITGVIVDLQECSVLYVSIPLGNQGVGIVERDFTFEDTDGTEVAAAATCSSITESIIESCVWESGGILYFGDWNIEGAGECGEVEFPPFMSILAIDYGERVEQGNDTAALLAAMTAEIFAGTGLLTSRQQLVDVLGAIVRLESMAWDVQTAYDPLNVVEIGISAWVPVVLLLALVLPAMAWGFV…
CL7145Contig1	Esi0700_0003	71	E. siliculosus only	signal peptide	2				no intron, 5' and 3' UTR	-4.12108	-0.4993	-3.87439	0.717535	1.23638	1.17913	MSGPLLLVVSWLGVRLVALANTGRQARFMPCIFGLYVAGGGARVDVLFVLPLGSRTPRSTCPLASVGGTRM
CL2921Contig1	Esi0888_0001	56	E. siliculosus only	other localisation	0				no intron, 5' and 3' UTR	-1.82453	-0.756565	-1.542	0.262062	0.22547	0.191544	MVPDRCFVSNVDTVGTPPRLFGKHVLNGNACKPAIEMYLPLLGVVKTSVLFTCNPF
CL4818Contig1	Esi0356_0029	1040	E. siliculosus only	mitochondrion	9	IPR016177	IPR001471		7 exons, 3' UTR	-6.67734	-1.44193	-3.10362	0.682807	0.839801	0.144156	MHGRAAAAGPLAPPSSSRVAFSNTAKTGGLAISPPTLPRRTPAGASSPAAAAAARALASEAFGRPYGPPSDDFAGGPAAAAAAVAGMAGSRAPVSRSAANAGTGAGRRVSDGGGGTGXXXXXXXXXXXXXXXXXXXXXXXXXXXXXXXXXXXXXXXXXXXXXXXXXXXXXXRQRQRGEEGGGRAGGDESLEAPVTPRRRRGRKGRSIYRGVCVTREGKWRAVIYKERKQLYLGVYESELEAAKAHDRAARFHFPDKSMTNFATEAEADRVIAEQEECGDGGGECRSCQSVVGPTRRPINCRDLAPYPNCSPMERLRFHANLSRGLEPYYRGPSDGYPGEGDAEGNDECRSCQGVPGSGPRPICRDFPPYPNVSPRGDRGSSSGSICSSNDEEHQATGTC…
LQ0AAB34YC20FM1.SCF	Esi0356_0029	1040	E. siliculosus only	mitochondrion	9	IPR016177	IPR001471		7 exons, 3' UTR	0.317191	-2.21203	-0.528217	0.22572	0.299815	0.437504	MHGRAAAAGPLAPPSSSRVAFSNTAKTGGLAISPPTLPRRTPAGASSPAAAAAARALASEAFGRPYGPPSDDFAGGPAAAAAAVAGMAGSRAPVSRSAANAGTGAGRRVSDGGGGTGXXXXXXXXXXXXXXXXXXXXXXXXXXXXXXXXXXXXXXXXXXXXXXXXXXXXXXRQRQRGEEGGGRAGGDESLEAPVTPRRRRGRKGRSIYRGVCVTREGKWRAVIYKERKQLYLGVYESELEAAKAHDRAARFHFPDKSMTNFATEAEADRVIAEQEECGDGGGECRSCQSVVGPTRRPINCRDLAPYPNCSPMERLRFHANLSRGLEPYYRGPSDGYPGEGDAEGNDECRSCQGVPGSGPRPICRDFPPYPNVSPRGDRGSSSGSICSSNDEEHQATGTC…
LQ0ACA1YD13RM1.SCF	Esi0155_0019	79	E. siliculosus only	other localisation	0	IPR013090			2 exons, 3' UTR	2.00357	-0.273025	1.39634	0.179424	0.890037	0.528978	MMRICSAVRSCVAGSFCSDTSFGDGSSYRLLRPVASSAADEEPSLRPRSSAGGARVGECCDIHHRCEAGCRVAHRGIDA
CL1831Contig1	Esi0322_0029	860	E. siliculosus only	other localisation	1	IPR001487	IPR011011		4 exons, 3' UTR	1.69999	0.287152	1.39862	0.191803	0.232649	0.214479	MLWRFSGPIIWRRVAGGLADPLACMASNVFPGGNSSWGSKHLPLSPAALVGAPESTPPQVSNEGSESGAKSGRSIAPNAPGTTAAAAAVGNNRHGQHPLYLQPLNPFHPLAGAGAGLLHGKSGDDGRGVGDVGLKHPDALKMILLEAEITNARSHNLHLHHHVAFLETQMSGQLGLIAVLHNKIRALEADLKSAKAATIAVGATPNTSNPTATSCDSADACPPQPSNPVPAEELVQHRAARPDPEKEGTAGKYALCDLRPHDGYRATAAESDRHGGSDVAAPVSAEVAQRTVAAPLTLSPQNEEDSAVESFPRAAEAKLAPSADPPAPGSPSSALAAAAVHQAESVGGENDGSIAAAPTTPRHSLRDFWADSGSNDIDNSPPSSNTRNKRHQAAQQEKQ…
CL2933Contig1	Esi0538_0009	77	E. siliculosus only	other localisation	0				no intron, 5' and 3' UTR	2.23182	1.10782	2.64156	0.554288	0.647109	0.332602	MLSVSTNHYTLSRVLSALKRGDTNVPALESTNVFLGEVKCYRSGEVSLERYPLSFSHSAGHRASEKNIGVPKSGESP
LQ0AAB73YP05RM1.SCF	Esi0538_0009	77	E. siliculosus only	other localisation	0				no intron, 5' and 3' UTR	2.1287	1.44607	2.50703	0.731908	0.153299	0.274972	MLSVSTNHYTLSRVLSALKRGDTNVPALESTNVFLGEVKCYRSGEVSLERYPLSFSHSAGHRASEKNIGVPKSGESP
LQ0AAB32YA07FM1.SCF	Esi0895_0001	217	E. siliculosus only	other localisation	0	54236			5 exons, 3' UTR	0.57713	-0.953609	1.85062	0.780253	1.02482	0.226808	MEWMKTREGLGEKQLESGKTLRESGIPPGRVDLRLDVKGGSGGGGDCASGAPITLKLRVEGGKAFMVTTTTGTKFSAFMEAFNEKVGIPQERASECVFKFDGDKLNPDGTPEGEDMEPEEIIDAKFPADVMNSVQAAPTELSLAAPKKKKVPRKVPGKGKAAVRKTTAAALAAAAKPLGGGSGSRPTRGGGSGRVTRSRSGSGGGGEGKQPEVVVLD
CL5588Contig1	Esi0006_0125	60	E. siliculosus only	signal peptide	1				no intron, 5' and 3' UTR, 1 intron in 3' UTR	-4.88034	-0.994049	-4.10988	1.32149	0.201484	0.432691	MSLVPVAEVWTLCLLILLFAQYAGEWVAIQQYLQEELSVPGNTGVNAGHLRLRKSSSISS
LQ0AAB33YD19FM1.SCF	Esi0000_0051	62	E. siliculosus only	other localisation	0				no intron, 5' and 3' UTR	-4.82917	-4.25474	-4.17921	1.31543	1.52699	0.287745	MRWSCRSFAEGRTHRESSPCGHKLMKVVVSLPGSRDVIRLLYILPSVGLVLPPQGRSNSDDS
CL5334Contig1	Esi0000_0157	319	E. siliculosus only	other localisation	1				9 exons, 3' UTR	-3.95053	-4.06077	-1.97046	1.41366	0.244596	0.591263	MAGGTDYYYVYLSNSAWYISPNVVDYPKYRTYDDAGHPADITLGWAECDNASCDWDEPATASFNVTCADTVTATASTCTNVVLSDFGDFSGTYAEVADTSYDKQYSMATGVETYSIYLNNDAWNVQPLEAEYPRYRTYDDASNPADITLEWVECDNSYCDFDIPSPSPIVITCSGGSSSSDVLPTPSPAGVTDGTGGSSSSDTLLTPSPTGVAETTEGPLPRGVSAPSSSATSTYEPSGSSSDPDAPTAGNSTDEPGTGDAANIEMDDDGDDSGGDDLSSGAIAAISAVVLAVVGGGLGVAFKHNNIHCCQTTHFSSSA
LQ0AAB76YI24RM1.SCF	Esi0000_0374	54	E. siliculosus only	other localisation	1				no intron, 5' and 3' UTR	1.63863	1.24601	1.24746	0.388261	0.183938	0.300106	MHRWLWVVWSELARDRPARILYHVPAVFPPSGKGLIAVCFFLCAAHGAWCSRKE
CL2775Contig1	Esi0000_0390	316	E. siliculosus only	chloroplast	2	PTHR12406	IPR002641		8 exons, 5' and 3' UTR	1.13064	0.991136	0.743739	0.142019	0.315449	0.276541	MMRMYPLLFGAGAARKCHAFSTAGFVSSHPPPPQPPPPTLSSQIGFSFTPGGLLFPYHLGVAKCLEMEGFLSNDTPLAGSSAGALAAVVVGCGLSIDTAAELSGRVFDDCSDGGAAFRLRNIVQKGLDGALPEDAHEILNNREGAVTVGITQLGFPSLKKSVFVSNFESRADLIEVLLGSCHVPFWFSGQPYMQVRGQPTVDGFFAMPRAQFGAPDIPTADEVVRITVFPTTSVPMQSDKPGDLISPDLLDRYQSGRFMELLNYALNPGNDFVQEELFNAGFESGGVWCDKYGEDYRRRHEEKYSPEMLAPSTAGL
CL1077Contig1	Esi0000_0407	211	E. siliculosus only	other localisation	0				4 exons, 5' and 3' UTR, 1 intron in 5' UTR	-0.636138	-1.91448	0.687172	1.49192	0.24337	0.285799	MQKAKERPNLVHWRDELVAITKDSSEDFEDATLSVELMRVRCDVCYHEKSDGDKFCWNEKCWMSPVFSGYCHTGANDEVIAPTPVQQSAGYINTFGRETLIDPALTSALQAPVKWLETKRKRKLEAHEVFSEDPALYRWQCWASLSKNPNSKDPTFVEDPRFRAAGRGDSADNGRNVSSSKPSPESGGDMVRHDEGDEMHMDESASGRGWA
CL4599Contig1	Esi0000_0552	703	E. siliculosus only	other localisation	5	IPR001251	103473		2 exons, 5'UTR	2.53027	1.06514	1.59253	0.214214	0.194267	0.69491	MGTHVPSRTFLLPSPFKPRSPLTRPTAPGRWHACRRVIRPMLNERTQAKIGIINTDAKKIAAALLECIAPENLPRQYGGTCPLDLGESEEELDLRTYVASIATATAAGPGSHAGAPPTPTPPPSGLEALRSNEEEEEEVEVDFRARSEPTARAGGVGPRNNGLPAAAAAGAVTKGRGPAESGVLGGGGGAGLEETGGGGLVAAGRPPGAARRVLGSVRGALGWAGGKLAWRRSTVAHLGQENGFQYDSEQHRWVLRDDMAGGGGGKAGAVEGGGASEGGGERVGQTTSTRRERGASVSSEDMTVLAIQAAHHSLVEAGLKLSPVPSESPAVLGSSSGVAAARDDGGFPSRLSYGGKPGTFPGGIAAGEDHHYCYPQPVSSLSVPCPCLRPLGRRASRPD…
LQ0AAB67YL14RM1.SCF	Esi0000_0637	543	E. siliculosus only	other localisation	1				8 exons, 3' UTR	2.31648	3.85572	3.36697	1.02659	0.333931	0.199699	MRAKAESLQAELDARETALSTETQKNEHVAAQLGASKESLYRAQQRLEELEGVTRENRRLEALLQEEAALQAALREDVNAAKEELRVAVAERGELMRGLRQAKVFNDELAKGKEKAEERERAACAQCIDTKEGKLALQRALLEQLSASRAELREEQKRCQKAEATLGRLADSAAKRSRNRGLPPLEDDGESDEGASVSFEEASRHIKMSDGVSANRSIGASGTPTTASAAVTSSFEPPRPRDTLVQDYLGREGAEQFLSDWDEERSSASSLSFSSLPLQSPLSTGGRSHGGSRSASFATGRPTEVSLRAQPWTPPPPPPRPPIPPLPPEELPSLAGSSGQIPWASDSPGHTTKGSAPCPGAPERGEEPSTAAATAVAAAAVAAARRLRDPDLKEWTMSM…
LQ0AAB96YJ01RM1.SCF	Esi0002_0102	267	E. siliculosus only	other localisation	2				5 exons, 5' and 3' UTR	2.28544	0.333951	1.76264	0.168954	0.497224	0.335089	MADFTLSAPKRLGKTVILGYCDIGAAGVRVLEGMSGASQMTGEGACSRLRETGREALAFSGMGAAVFDGVPALEAVHFESSAGGTDEPSVTLLKLNTAVGQGLSASLSLSLVDLLVARRTTLDRLIIAAAVQPPKRHQIPAEAATIPPDAVCTFSCGGVDSNSSPLPASLSTLPSLPTGARIADSFLTTLVRLCRLEDVPLTVLARVGYRTTGAAADVDGTDEAINGLGQCLAQAVGLEFNSNRACGVRRSKGWKGSPSAQVVPGYI
CL3340Contig1	Esi0002_0166	53	E. siliculosus only	other localisation	0				no intron, 3' UTR	-1.26353	-7.3174	-1.17565	0.915349	0.444724	1.05514	MIGSGVDIVSISVLREPGSWQHLRRFFCLAQGGPGGELDGKIDMSHALASCPP
LQ0AAB68YP21RM1.SCF	Esi0002_0202	167	E. siliculosus only	other localisation	2				2 exons, 5' and 3' UTR	-2.29857	2.76544	1.2575	0.353172	0.471646	1.17335	MVVVLADLQKNMSIVSIRSEFAAVGAPVSSLPLPPPSLCCVPLFPTHRLTHFGQPRHRKRFHDSCLITLQDGLLTSFKFDFVRASELEEAKEILLCGGGGVTSVVSINGITVGRVKKETIGDGTSAETGKAEAAKPGPVFWALRELLAADMEGAEFTDAVPYELYED
CL4606Contig1	Esi0002_0232	586	E. siliculosus only	mitochondrion	12	PF02233	52467	PTHR10160	12 exons, 5' UTR	-6.15616	0.725072	-1.39362	0.917574	0.560203	0.556054	MITTRFSLSTDHAIRRGTIHTQVVKGVSHSLHSPLMAVTNAISGLTALGGMYLMGPGLVPHTTAELLGAGAVLISTVNISGGFLVTKKMLDMFKRPDDPPEYYQMYLLPAGTLLGGYAVTKAAGYPQMDHLVSMASAVCCIGGIGGLSSQSTARLGNVLGMSGVAFGVAATVGTLAPGPAQLAQLAGLMGVGGVGGYQVAKRVGPSELPQTVAAFHSLVGLAACGTAVGDYTHHMHDPAATADAVRMSAVYLASFIGGATATGSVVAFGKLQGLLPSAALKLPGRDPMNAGVGLACLGGMAAFVVGPSSPAMGCALLGLSAAGSGFLGAHMTASIGGADMPVVITVLNSYSGWALCAEGFMLDKPLLTVVGALIGSSGAILTDIMCKAMNRDIVSVLLG…
CL4482Contig1	Esi0002_0241	297	E. siliculosus only	other localisation	1	PR001932	PF00481	81606	10 exons, 5' and 3' UTR	1.99168	1.96025	2.2002	0.167931	0.403753	0.292921	MASMEQEDPLPPGYPCVRSSTFSSASPFLCPEHPTNEDRALVFDDMVSVLKLAPTGTRGPLACLFGVFDGHGGDGASKFVANHLHHLIGRSAFYESIDYPADEALASAVEEGVASVEQAYTDWSKRSGDTSGCCACVVAIRGSVLCAANVGDCQAILITDKGAIVSLSRPHRAVDLDEKARIRSNGGKVVQGRVMGVLEPSRVIGDYDIKRTWPGCVIAEPYVLVRSLPYTRGQEPSILVVASDGVWDFMTQASVSKLVTEAIRKQKDPRQVSKELVAAAREAGSGDDITVVIAKLG
CL7703Contig1	Esi0002_0242	313	E. siliculosus only	chloroplast	1	IPR002197			4 exons, 5' and 3' UTR	-2.35106	-3.1288	-3.06456	0.427889	1.12521	0.380402	MATEVTRTAGNRPGFSQVVTLAWLVGLLQAAEAFSFTASSSVGALRNVAVSSAPFQRKWRRRRSLNRGSGGVSSLKAIGVTSSVIESVAKGILNLALANPRQATVECTVNSSAMNLVRGNLEQAKVDGLNWVTPMGMTLRTIALTLNEMNIKPSEVFRGKILFKCPAEGEALIELDAQDFGNFLVHPLLTTADLPSGKFDFRREGTALDVERGRATFTGSWQGQPVVMEACQPDRFGKIHARVAQRGRLTDLGIRTLSEEMTHFFNTVVLDLDGTAVRFRDMYHGYNSRGEPSLRVTVSVVVHRLPKPENMKF
LQ0AAB80YA19FM1.SCF	Esi0002_0262	637	E. siliculosus only	other localisation	3	PR004087	54791	IPR010993	2 exons, 3' UTR	5.53513	1.01565	3.791	0.672955	1.98651	0.461766	MVRDDGFAAAPQMQQHHGSMSASRHHQPQQQPLGSSSAGREVLGEGSFMGRGYSIKRCQGFVRCDMDIDAEVVGWVIGKNGSTIKDMKHKTGCNMWVDQRALKLTITGPDLPSVEHAAKSVDAYVAAAPIKAGAVEAAVTKTIECPPQLLDDLGDRTTIARIVKETHAQVVVNKKIGRIIVRGDHRSVDLAYESVRAMIHNAVHGSYGLGLRVSTPDSHGSFGVGGGAGGGGGGGAGYFPDGAMSSSGRGGGGGDMRSPLVSGAVAGAAAGMHHLMLPSTAGGAGGSSHADPDLHHLAAPDYRHARDTAEFHHLATWQQEQQQLELKSEHSHQPLQRHHHHHHHHHGRGVGSDTDDSEIETVSLGSIGARTPVSSTAGSPRVVGSYNTSPALSGTASTP…
LQ0AAB71YK09RM1.SCF	Esi0002_0323	294	E. siliculosus only	other localisation	2	48371			3 exons, 5' and 3' UTR	1.67319	0.803299	-0.368191	0.215694	0.456477	0.402849	MQSPTSLSDIVSECRRGLEAVKDALLKTHADIRLQCKAANALASLCMSEEVARGFTAAPNSSAVVDRLGDMLRSRSQWAQADAAGCLGWLVGTLAGGTALHELIPLVTRLMVRHTTKDDEVFISEERQREQQAVWGRSRSSNSRGGQGGRGGGGGDKEDQARERMDNIRVYSLIFLLKASQADPSTMPAMVEAGAISGLLMHLATAADCTSSSQQQQQQQQQQQQQHQRTPKKQEADSVRARGVFGQRHHGTDGNAADGGGDQTPPSLLLAARLLYAISLDPGGRCASNFLELF
LQ0AAB7YP05FM1.SCF	Esi0002_0330	178	E. siliculosus only	other localisation	1	48371			3 exons, no UTR	-0.333113	-1.47517	-0.117732	0.596929	0.113679	0.168753	MANTKGGGRENAFHNPRQNLEFRGEVIVPYYPELLQALHPLFALTSKGTEGGVVDNAAAAVARMIMAAPAALPMDQVLPVFLSALPLKSDRSENEAVYTCLLGLIHLRHPEALRLLDSIMAVVAQALTPAAKVQEEIQDTLVKGIQAAAGELGEPLNAAIEKLPADLKQGLLQRLNAQ
CL3035Contig1	Esi0002_0338	172	E. siliculosus only	other localisation	1	IPR003368			6 exons, 5' and 3' UTR, 1 intron in 5' UTR	1.25518	1.00909	-0.203805	0.146911	0.104997	0.404207	MNENDTDGQYGGLGGAIYNRGEITVEGESLFSENRSSDGGGIYQTSIGIMTFNSMATFFHNVAENLRGGGLMNDGGVVNINAGSLFEQNFAAANADGGRGGAIHNRNGGVVTLMGPTTFRENGAWWGGAIYTDDGYPASVTTFPDDTVFEDNSADAYCPDVHNGDDNNCPVV
LQ0ADA9YC06RM1.SCF	Esi0002_0338	172	E. siliculosus only	other localisation	1	IPR003368			6 exons, 5' and 3' UTR, 1 intron in 5' UTR	2.49561	1.64643	0.0408025	0.294653	0.356655	0.529817	MNENDTDGQYGGLGGAIYNRGEITVEGESLFSENRSSDGGGIYQTSIGIMTFNSMATFFHNVAENLRGGGLMNDGGVVNINAGSLFEQNFAAANADGGRGGAIHNRNGGVVTLMGPTTFRENGAWWGGAIYTDDGYPASVTTFPDDTVFEDNSADAYCPDVHNGDDNNCPVV
CL4510Contig1	Esi0002_0342	343	E. siliculosus only	signal peptide	3	PTHR23131	56281	IPR001279	8 exons, 5' and 3' UTR	1.93802	0.881382	1.34782	0.153858	0.679086	0.508689	MAYLLSSASFLASAFVSNVLQFVSRSIRASPLLHQAVKVLDRGKSKVPRGMPHVAPWAVESDLVVRMLALNPGMHTLQGTNCYLVGNGARRILIDTGEGKAGFVPHLLDVMRQAGCEMLDAILLTHWHVDHVGGVNDIRKALGGNIPVFKKYGPTVQDFDYSGIEDGQLFRTTGATLEAVSTPGHTEDHVAFVLHEEKALFTGDMILGCGTAIFDDFASYMDSLQRVRDMSPKYEGGFTRLYCGHGPAVEAAQEKIEYYIKHRQEREAQIINALTAAKGRTLSALQITVRVYGVLPLPIFVSAHYNVLHHLSKLAREGRAVLGWVPCSYYLGPERGLNVGCTD
CL633Contig1	Esi0003_0082	65	E. siliculosus only	other localisation	0				no intron, 5' and 3' UTR	1.43962	1.02323	1.05222	0.0682147	0.287399	0.259716	MYTKEERYVSRRPWRQDTHPPFWLSIQTHLSIHVRLPNLAKHGTQNQAHCTRPAAPALIQQARLL
CL4946Contig1	Esi0003_0208	90	E. siliculosus only	other localisation	0				3 exons, 5' and 3' UTR, 1 intron in 3' UTR	2.87055	1.1249	2.66751	0.302882	0.735245	0.127885	MVHDPMQQFGEAPVFVNPRRRGGINYAADSAEAKWAAGAAAQPCREDTRGRMSVDQEAEVGAEMLRMMKMWSFNGGAEAHAGQEAPVGQR
LQ0AAB61YC19RM1.SCF	Esi0004_0146	73	E. siliculosus only	other localisation	0				3 exons, 5' and 3' UTR	1.61521	-0.633221	-0.0336175	0.213837	0.645074	1.39234	MTTTTPRKVKGCNRRTMVVAKRRKRKRMRSENQLVKRHGPSNCGWACCLKYKRFLSLDEVANKFGGVGGGGNC
LQ0AAB60YE08FM1.SCF	Esi0004_0223	305	E. siliculosus only	other localisation	2	50249			5 exons	3.63935	-3.88907	1.67657	0.234396	2.59762	0.417228	MSLLIYVLQAGNAGASSMGRASQPRSKGIMPPDPSLDPDPVSSADDPERSEHRDLRDRDRDHRDRDHRDRDHRDHRDRDRDRDRDHRDHRDRDRDRDRDRDRDRDRDRDRDRDRDRDRDHRSSASHGGHHGLTKRRTSSRVDTKKLPSEISVLEIRVGLVRKVTPLPRNSAHAMIAVQVHPNDKDLTEQRTVLWHFDTAPPSVGTSVILLCNLPSIKHQGIMFTAVVLCMDDDLLIPPPDAPIGELVTVKGHPPTPSKNERAVSMVWEKVLNEELFQVGDDEVVRYEHKKTPGPLMTSRGPIMCT
LQ0AAA22YP17FM1.SCF	Esi0004_0225	470	E. siliculosus only	other localisation	2				4 exons, 5' and 3' UTR	-3.75633	-2.79439	-3.9558	0.317663	0.860264	0.660747	MGLDGEWQVKSGEGKRARRGAGSDGFGSVPGQLPEKTRDGQDWAEWAREWREDPDGKADRLVSQWDAEAKANEGGGSQDGRSKKRKAKKKKKGKAGPSRGVVGSGFGGPVRQTKSVPKGLVVSETGGGKGDVVDWSKGQQLRETDRKENMVADWQQNAKNLESLDPSDREKLAEQLRTALGKKKHKQEKKTKAKPSDRGESKGFSTTATTTGGADTAAIKGRGDGRGALASAAAAAGALAAEDVAGVSVFPSAAEGSNGAMEQLGSDGECEGGESKGAEGKSVSAGGGGEGRGKAEPLLVDAGVEGDPGKTTVAGSSGGVLVLPVAGAAVEGSDSPLDGQQLASPGADGIEKNSDGVTLERVMGFGKGVAVVEAATDDGVCNDAGGVSAVGSTGESSRD…
LQ0AAB57YB14FM1.SCF	Esi0004_0250	112	E. siliculosus only	other localisation	1				4 exons, 5' and 3' UTR	1.39083	-0.491002	1.42388	0.216547	0.486963	0.152922	MATGPYPSTDEYKPINRAEAPPTAYAVTGQPVPQAAEAAPVMAAPGAPTTGMWVEERYCGLTTWLITVVGSFPCSYFCPCDRRTVWVAGGKKYNEKGAIVDDQLFVNPFQGR
LQ0AAB23YJ05FM1.SCF	Esi0004_0290	106	E. siliculosus only	other localisation	0				4 exons, 5' UTR	2.05221	3.50879	0.0622316	2.42635	0.259482	0.57052	MVFRPDIVELRSCDAACGLCGGDGCGDVTGLTGLDCCSEEIAIVNDLCTVTNAAPCVMDPPDFVASTCPNGIAGVQDGSVCCAEECNGVCGGEGCGSIVGTNGAEE
CL5619Contig1	Esi0005_0009	285	E. siliculosus only	signal peptide	3				6 exons, 5' and 3' UTR	-2.23535	0.716081	-1.252	0.175912	0.517402	0.461933	MGGEERRNLGGRPGRIGRKMMLLACLSVLVLQQCTAFVHPAVLQQRMSLRASPVHHAANHRRAVSALSMAKKGGSGGSKRKKKKAAAAEGAGGAATVNTRAVPASSSEDDEFEDAGAPMMASGGGFADVKTAKRGEILEDGVIGSDDAREAKIEETLRKMGVKSIGQVRAAKAEEDKENKSVGQQITSIFDLIPPETQLVMERVFIAGFAVCLLFLVACGCAIGVEAYFLSTNGKLPPDLDSFIVGTLEPLFTPSLGATFLFSSCLGVLKLGQMGQESIVYREDD
CL1281Contig1	Esi0006_0022	136	E. siliculosus only	other localisation	0				3 exons	2.1816	1.60678	1.92138	0.286602	0.478988	0.276801	MMFDDIVLLDDRMVAEGKDAGREDGRARGFKEGEGMGRGKGFQTAAEMSFCRGCCLAWLSMHAQDPDKFPFSEKALASMRAVVTLAESVPRVNTQEATAAQTAQRVRARFRAVTSMVGLPVVFDSKGQAEAKDFSF
CL2949Contig1	Esi0006_0104	85	E. siliculosus only	other localisation	2				no intron, 5' and 3' UTR	0.397222	1.13263	-1.06425	0.150692	0.124312	0.579637	MGRGGLSSATGFLGATGGFLRRSKNLPHLYFFNCTHEGGGGCRGKAGCVALSRLLLGTGFNFSISLDLSHVNVPVWIGFPIVVSM
LQ0AAB94YN04RM1.SCF	Esi0006_0191	49	E. siliculosus only	other localisation	0				no intron, 5' and 3' UTR	1.62696	2.39467	2.06191	0.305149	0.0276408	0.0818517	MCGLGGTQTGSGVSRAHVRGREGASVRLANFFYCVREKDLHRWYRWSAF
CL4007Contig1	Esi0006_0221	327	E. siliculosus only	other localisation	0				7 exons, 3' UTR	1.79758	-2.6552	0.734068	0.116557	0.925279	0.0930056	MDQSEIVLCDTLVSYLETTFMNVKGEAPKAAAVVAPQAATNDEFKGMKMVMKKRQDEEFIVMGGGRKKGGGKKKAGGKNAAGGKNTIVHAIDTMESFSMLSIAPPPNKAAVPDAIKALKEKKAWFAEQPRPTATTAKPAQVGEKSKKAAKVKAKAPDINDEEFPGLPGMASKPKTDEAGDGEDGGEGETANGDADAAGDGDGEDKAEKVAPPTAASIVANGVTGKAAAEPEPAAEETPAPAEDAPEAEGAKEDGEDKTAEVVAAKEDEEDAAAPSADVEDKEAEKAEEAADTPAAAEAEAEVAKKDDEPAASGEGAEETKEGGAKEE
CL4772Contig1	Esi0007_0064	50	E. siliculosus only	other localisation	0				no intron, 5' and 3' UTR	1.6054	0.254996	1.03293	0.329774	0.370276	0.506961	MGTLNSSMHPKNTDLSELQRSWKMQNFRGHKPATPEDETLEYSKFKCTLE
CL1070Contig1	Esi0008_0060	325	E. siliculosus only	signal peptide	1	IPR013838			6 exons, 5' and 3' UTR	-5.45918	-0.146131	-2.43811	0.485873	0.40229	0.852495	MRDLRNRLRAAVVFCAAGPVASFLPLFSPARARAGLVGAPCSRGVEPRRSPSRAPVGSTQLEATAERPEGHALQEGQEEKASSSASVDTPPAAAPASPVVDRSSAEGGEEKAGLAQNVAAVAKETDATASVGQSAEEEEVMAELLAHQPGGQDEAQEVDAALKPSKRVTKRLKKYFPKDFQDTTWTVAIQWNHSKYEVKTTKVALKADGEVVWLDKGKGSWILRTKSRDISIYRNFFLNWAGMRIFSAKLLNNTCDMYLSGVIKGWQPFLPLSKMGTWQAVRRGITLDENTPRPPWESREVVKEVTMPDGRKRKNTPIEIDVDLD
CL299Contig1	Esi0008_0092	110	E. siliculosus only	chloroplast	1				2 exons, 5' and 3' UTR, 1 intron in 5' UTR	-2.05569	-0.154301	-1.02139	0.655633	0.226965	0.0971095	MVRTAFVSVVALSASANAFLAPVPGYSLARTSRASAPIQMVTSATPAVSTGEGKMVSNEETYTAALKKMEAESLAELEKAFEETAKKAKAESDKIWGDLEAEFAQDVDEA
LQ0AAB60YI01RM1.SCF	Esi0008_0243	82	E. siliculosus only	signal anchor	1				no intron, 5' and 3' UTR	-1.61973	-0.780777	-0.332697	0.25552	0.270372	0.327922	MQVLYLVVESIRTWRWSGVDAGLHTAVIVLIYFVPLFSSLGILENVGAGKLRQGLNELLSCLYEWVWLERLSHFISPLFLFP
LQ0AAB36YD05FM1.SCF	Esi0008_0244	130	E. siliculosus only	other localisation	0	IPR007741	PTHR21396		2 exons, 5' and 3' UTR	-0.107435	-2.68163	-0.470965	0.317247	0.442551	0.183187	MATRGVFQLRKLTLKYCDHSGSSKGAREFIRHRIVEFANNTPAAEVVTELRPGKHPYIMGDYVTGEVKTIGIKNIAPGEIMDYAMMLRNSSGHKVRKFKKPVESRYPSIQGVWDIDAPLHTTDIHVEHHD
CL3996Contig1	Esi0008_0248	51	E. siliculosus only	other localisation	0				no intron, 5' and 3' UTR	1.07452	-0.44429	-0.173354	0.113934	0.292363	0.725668	MCPMTTLVPCDSRPWVQCSVRLPSRGETCVINTSGFCDHPENADFLYLRGM
CL7463Contig1	Esi0009_0040	251	E. siliculosus only	other localisation	0	55120			no intron, 3' UTR	-4.84313	-0.844806	-2.60689	0.824342	0.935385	0.624589	MYRQRLQEDGVDPLMWPAPTPPFKTHFPRLPDGTTRATAIDAAGLTASQAPLTGAPCLSRGIGGDVGGRDSTAAETVTVATEEAVASSTLVPRGAYRRLLCVPVDSSWEAVAPLTKADDPEEVRIKRSSMSGRGQPNGTTPPGDAATAPGDKGRVPLKDGHSDGSQVSGDGGQSGGFAKDRGGADLKAASANDVLTDVRLTFTLPPGSFATMCLREVMKRNDDVGWGSRGAMEEPQEEGGVADTIAVDRTL
LQ0AAB37YM15FM1.SCF	Esi0009_0040	251	E. siliculosus only	other localisation	0	55120			no intron, 3' UTR	-2.34242	-0.915956	-2.19455	0.345532	1.10956	0.489677	MYRQRLQEDGVDPLMWPAPTPPFKTHFPRLPDGTTRATAIDAAGLTASQAPLTGAPCLSRGIGGDVGGRDSTAAETVTVATEEAVASSTLVPRGAYRRLLCVPVDSSWEAVAPLTKADDPEEVRIKRSSMSGRGQPNGTTPPGDAATAPGDKGRVPLKDGHSDGSQVSGDGGQSGGFAKDRGGADLKAASANDVLTDVRLTFTLPPGSFATMCLREVMKRNDDVGWGSRGAMEEPQEEGGVADTIAVDRTL
CL1600Contig1	Esi0009_0072	167	E. siliculosus only	signal anchor	1				4 exons, 5' and 3' UTR	1.49205	1.352	1.33162	0.144056	0.177911	0.346914	MGPKKPEEGQPNADAPPAGVVGGAALVGATTGLLLSGPLVAIGLGAGAAACCLRRDQAGDVARSTGQAGLAVVEKGKEINTQYGVADKVKGAAHSTFERAKEVNEEHKVVDKAKAGVSRAWARIREVDREHRLASRAGEAFGGAMDSVTNAVSKKDDGQDGWGATKK
CL147Contig1	Esi0009_0084	222	E. siliculosus only	signal anchor	1				4 exons, 5' and 3' UTR	2.81056	0.218251	2.81076	0.345732	0.355874	0.317605	MCKSSQPQGSSEAAPVAMEVPTNDSYDLAKPCAISDNEQPHQEVIAHDEASGIIVFGSFIAGALVGVVICAPAFVVLLFGAGAAALTKSDSKVGKFSRKVGKVSSDILLAVFRLAREYNHKHKLTDKAKVGAKEAAGKVTDKMRKLGIVDNVKARASSLWDQVDKRTAPAGQASIQAAQGQDLSQVTDGTQIPFDGAVDAYVTDSSSSSSYSKGRKPKSFDA
LQ0AAB29YJ10FM1.SCF	Esi0010_0006	83	E. siliculosus only	other localisation	0				2 exons, 5' and 3' UTR	-2.27608	-2.52507	-2.3152	0.698497	0.247619	0.65248	MQHASPRLATRSGTPAEAAIFSSLPTRARLLFGFDVAHYREMSPRKEAGSPVQGQLIALVKRGEGRQRQPAQEEEQEDVSSEL
LQ0AAB40YA13FM1.SCF	Esi0010_0110	165	E. siliculosus only	other localisation	0	IPR000637			6 exons, 5' and 3' UTR	1.15923	1.19922	1.29936	0.172671	0.277971	0.0827735	MTPIGRDPATMKAAREEAAKQIKDRQDAKTGKGLPAEEEVEEQEQEQEEEEQITKKGKASSRRKTILTPVGRDPAAMKAAREEAARQIKDRQDAKTGKGTPAKEEEEEEEEEEDSGMTEREKSRQRAAQWAKDEKARKALEAKKKKAAAAKGESAAATPKKRGRR
CL2754Contig1	Esi0010_0120	58	E. siliculosus only	signal peptide	1				no intron, 5' and 3' UTR	-1.01888	-2.10116	-0.298081	0.709584	0.197886	0.210327	MNVVVLMLLLYGVGDASPLSLPSIDGLLYPPRWLWVRRPGSCSCGMPVVHEGEGSVHG
CL3569Contig1	Esi0010_0144	504	E. siliculosus only	signal anchor	3	57850	IPR001841		9 exons, 3' UTR	3.72424	1.49636	-0.123186	0.485704	0.839628	1.03382	MGPGGSGYEVFESVLQLCSSGAGVSCIHGHLLQQNWCLVVVRQRRHEVLRAVVGCFLLTLLFYLLDARHPKSSLYCTRHAIMPDNELEAAKGLHVEDIDCSLVVRPTRTALDLRFFGEVSYSFEIVAARLVRPPKRPPDARSGRCRNKCSPGKACPCNHDSPARSRRLAEDVEPPGKTEVALSVPEGDGEGQEGEAGGGGEGGGVHPHHSLNMGVNDVATLVLEDNQGITYDFYTFQVVEFDADSGAMALDRWNLFHCGVFRYSCALENISKVEITEGNVYMMSAHAFEHLRQTKEFGLRVIFSVPLGASQAATAHPRSPRPNNAGMNFSDPGGSSPSSDGDGISAVSGTVGGAPVARAAARRAAGAPRRRRWGVLFRRLLLCGRAGWCFGGRGWWRRP…
LQ0AAB98YL04RM1.SCF	Esi0010_0145	59	E. siliculosus only	other localisation	0				no intron, 5' and 3' UTR	2.06531	3.75343	0.413544	0.516348	0.481546	0.871448	MSGFKRDCMRPATTVSCKRVVSCPCDLSIPSRVSFGTLGARVSNFGRCLRRVFWLRQTS
LQ0AAB88YI05RM1.SCF	Esi0010_0155	279	E. siliculosus only	other localisation	1				4 exons, 5' and 3' UTR	1.08075	-0.508251	0.942924	0.140534	0.469445	0.153554	MHAKSAAAAAAASETGSKSGPLFTLPSRARPPPAAAPADPPEEGMGELVRPSGEDTAAVPRHLETGTPGPSAGQQQWGGFDRGHAAAFPQGSYAGAGGYGGAAGAVGGVAAAGTSATDYAIYGAASQQQQQQQQQTPYYHPYAAGAAAGSCQPEFGGGGAKATRRKGRDMERALARGNLGALGSEMPVMDLEQGSNEYNPLRTKPTTAAMNQEQKHIESSVYDPSTGKTVKTLEPTSMQKRKHQINQLAAQAASMERDLMERSGASRLTKAQTHAKYGW
CL1848Contig1	Esi0011_0202	127	E. siliculosus only	chloroplast	2				3 exons, 5' and 3' UTR, 1 intron in 5' UTR	0.332236	2.37331	0.866095	0.838294	0.146111	0.351576	MRIALLSLAALRCSPFSATVQAFATPVSSLSAANRVDIRSLNASAGMSTTTAGRGEDVAEIELEAVFGDRISFIQTEDPGVTGRFEVVLRNTGELLHSKKTRGQGRCEDPREVQALVDQIQKFLDSS
CL13Contig22	Esi0012_0020	248	E. siliculosus only	other localisation	1	IPR000834			7 exons	3.57595	0.864224	2.69685	0.39861	0.71425	0.65596	MIPPVIGKSDSMTVDEMFDFKKAIADSAAKANGLEFFTFSERAWEKCLAALNIADEPIWLGERRPPPYAVISSQVDDPNGNAHAHDPVRRYPWGECHVMRPEHSDNTYLQCLLLEVGFQDMKDKMRKRYEAFKKQEAKPLVTRVGEKNREYRLAIASGKPSTILVVLAVIFAFVAVILAATQVNGNEPSTGLADWRELILKIQQVEGSDRIVTTVDSEEETLDVLMKVLMDNRKIWTFRGGPAGSTIR
LQ0AAB65YN11RM1.SCF	Esi0012_0039	515	E. siliculosus only	other localisation	0	PTHR13824	IPR003590	52047	2 exons	2.48058	0.0569584	1.82915	0.249504	0.663889	0.214837	MSNMRTTRILAAGKSVRRPTPEDRLQRKMEARAAAAAAAAAAAARSTPSPAAAPAGEATTPPPTALLTASPTRSRMLPAVVVVKGKTGSAASVATVEAAAARPSSTGDDESAIKTEFMGLAASREEPDAATAASGRSSERGGGVSVTAGEDEPRGGDAIGGGTRREGGGAANGVGTSPGKTGSSGGATIEGSVHEHGRGRSAPTDEGSSRGDHRQGCGRTHGLSRRETRTNDTIDKSDAEMGGDAGARGPSELHPADGDNKRLLRPSKPGAEEALLRGVREGPLRDALAALLTSTVMGEDGGRVLAPSFPSISALCELKYSEPIGPPQASAVERAILARPGVLLRLSLAGKRIGDRGAMALAPALAAIRSVDLRSNNIGDVGTTTIASALREAAATVRL…
LQ0AAB28YI23FM1.SCF	Esi0012_0081	503	E. siliculosus only	other localisation	0				6 exons, 3' UTR	-6.24333	-5.14778	-4.57895	0.490975	1.52237	1.2784	MEDFEFLQGKEAQAKESLNAAKSVAAAKQNELKETIKAHNNAKSLVAEVREAEANIARQLRDCAEFPMHAASRERLVAEFADWERAQEEEDSARDEEQRLEEELDYDDEQPQMCHNLEAVQDAWNDETTHEFGAVAGYPDNTTESAATRQAEVESEPSRNNGKVSSNHDKDRPRRYRWVGGQEQGQEEASSEDDRPRRRYQPDEQQEEEEEEEEEEEDRDNDAEYRIPLARRGRCSSHVANVQRRSSKGKGPLGKSRMAVSSQATRVLGGAQQRQARTVDHQTVATGNSKGKGKARGGANTLRQDHAASSAYEWRMNKGVPRTGLFGGVRKPRKVFFSGTTETNNWLGIKRKTPSPSQVAGEEGTGRLHHGNRQQEGGRAGDQNIPKKRVRSAGQKITP…
CL5170Contig1	Esi0013_0116	55	E. siliculosus only	other localisation	0				2 exons, 3' UTR	2.70742	1.01547	3.85209	0.370822	0.760134	0.442876	MQRLHMSCPRASSARDLLSGSVAPPPAARPLYEALDNRGPGADQQRLLSQGFRVG
CL3599Contig1	Esi0013_0168	698	E. siliculosus only	other localisation	2	IPR013994, IPR001283	PR01217, IPR013032	55486, IPR006025	14 exons, 3' UTR	-3.82649	-2.77237	-0.915163	0.457391	0.637668	0.30924	MDDGIRSNEMTPELCYDHCSSNGYDFMGLQYGRECYCGTEEEEKRHVQYGKGTCDSPCKGDGSLICGGFWSFDLYYIGETEPAAGDEGVDDSSEKQILLDLHNEARCVHGAEPLAWDETMEETARGHADELTSQENCGYLFQSNVTAHGYGENLFLCYGAADCMMYDGVLDSMYDLAVDDGPVVDYDVRARRMLWASTAKLGCAISSCVYQYIDVEVLVCNYDPIGDYGDPTAIEEEVGLPVQSEEECQQVAPPDTPSPGTTPAPAATTPPPSTGEEPIPTTAQPLPVTLPPSFPTSPPVSETDPPSPEPEPSTRAPVTPEPTPAPVKPEPEPTPAPVKPEPEPTPAPVKPEPEPTPAPVEPEPEPTPAPVAPEPEPEPTPAPVTDESPGVGACDPNPC…
LQ0AAB96YE22RM1.SCF	Esi0014_0108	136	E. siliculosus only	other localisation	0	PTHR13015			3 exons, 5' and 3' UTR	-1.85614	1.63728	-1.39641	1.11436	0.0814448	0.488032	MASPGKAAAPWAVKLVHDGKEQGVPAEKIRQKLVLEGLEPDLIDGVVEAGSLSAKLHTIEPSSPCTSPQRRQLSARKFHDMLSVGLPPAVVRQKMAMDGCQPEEINNFFASAGGVATAEAEEEMDEEAKLAEPQAA
CL2575Contig1	Esi0014_0114	123	E. siliculosus only	signal anchor	2				4 exons, 5' and 3' UTR	3.05781	2.28763	2.58764	0.33304	0.246384	0.379335	MSISNPYVLLALLCCALLLTFLFPTGEPRRAVRVGDRTLERQERLAAAVIGASCILGLTGAWYILLFYGGAGVLLCLLHGVFRPRSIGSKTSRAAAEAQAGFTIENAQNFAENIFGITGSRSQ
CL321Contig1	Esi0014_0222	168	E. siliculosus only	other localisation	0				5 exons, 5' and 3' UTR	-4.28282	1.90369	0.180043	0.423893	0.217194	0.486069	MFTLNANAPSFVPSNPVHQQMVRPIFNSGVPSCVLILDSDEYRSEFLINTFNREAVADEDLFNPAVYPVSAADHEELAAAENFNREMAELEALEHQEELRSLLQTRISALQQGTSGNQRPAKIASLNSAMFSGLSRGAPASELKGKRFNPAKKCPHNINQPLEAGRYY
LQ0AAB41YI16FM1.SCF	Esi0014_0230	60	E. siliculosus only	mitochondrion	0				2 exons	1.02712	-0.137456	1.7091	0.609016	0.429177	0.227789	MPPTFRCDACAIGLGLARARVEAAGRRGPGDAKAWTASRRGGGWGGGGSKRSGASSMLPW
CL3070Contig1	Esi0016_0018	175	E. siliculosus only	other localisation	4				1 exon, 5' and 3' UTR, 1 intron in 5' UTR	-1.62974	0.192517	-0.879286	0.22832	0.355012	0.351854	MGSNASDQDARVLQRVDSFGIPVVVSTLVAGFSVQLFGEATEDSTKVLTATAVICEIVATTLFSTIAFAAKQTYNCGSASNNRTVTFLHNVSWVTTAALTLYTIGLLTFGIGFLIQATRHTSMGFKTAVHLIVWLSSFISWLGIKHAYKGAAPLGTWELDPTLAKLTALRNETSG
LQ0AAB74YC11RM1.SCF	Esi0016_0170	65	E. siliculosus only	other localisation	0				1 exon, 5' and 3' UTR	2.44527	-2.33106	-2.23035	0.276211	2.17767	1.32474	MIDIPCISTHARTSWNLSEKGQIGVKHTGITVFVIPPHIDFVGTCRVWIGRPAELHPGLVCRGQG
CL918Contig1	Esi0018_0059	72	E. siliculosus only	other localisation	0				1 exon, 5' and 3' UTR	1.39105	0.335889	1.02534	0.0797483	0.493143	0.270123	MDRALPLLSRATHSLPTPSWINRVLAGYGWEQRQTKAVTTQNQNSKMISRAFAHPTASFSSRAKFSTKTNNN
CL4472Contig1	Esi0018_0061	474	E. siliculosus only	other localisation	0				7 exons, 3' UTR	-4.03705	-0.887315	-1.98217	0.521866	0.113964	0.85388	MQADATDMETQVPGAASSSLTQFDNRESAEIDSFMGELNFCLGPSDSVLSGPSLLKDLNTATNKIVKNLLILNSPEDSEPAMRDALKIEADFDAQHSESPQYPAAKAYLSCVRQLAIEGCPAVETLDALSEVYKPAFRRVAGALSDFGCTITPGDDSAGRIRPVDKDICLSILDYAVPAREQEGTTPTRALNTLVNRVVRTVCVGSDEDLQALAREMESKHNKFMTKCFGKGSWQGTQEDMFYHALVNLVKNGLTDEGVPALSGAYLNSYQRLMGILVQEVGTRSTPASEMVLKSFLAWEREIRKELTEPAWKSRPSDLVGSWALNTSGWDGLTDLPVDSSAAGGGTTDGMVDLGLSDLVVSFRKDGTVQIPVEKGVGLQWRVEPGPTHLDTIYFEMIP…
CL6267Contig1	Esi0018_0087	417	E. siliculosus only	other localisation	0	48452	IPR013026		5 exon, 5' and 3' UTR	0.288985	0.725267	1.20476	0.0874264	0.101858	0.118131	MDPCEKATSFVRLAHMLEEQGNVKEAERLCRAALRTLEEESHLGPDHVHVAATLVTLADLLASKEKPQNPPLHKHRPDETTELLRRAVGIGESWFRNDLAHEKLALWRNKLAVAYTDQGKHIEAASQYLKVIEKCKEEPSIDQKAIVNVAHGGLNTLASIANFDEIMTQFMIYSSGDRQTRASGDKAETATSAATAATTPPYPPMSAAAPGVFGATNEAPVCANNNTAQTATSAVTAETTPPYPPMSAAAPGIFGAIDEAPGVAATAEATVPTTLGASTSTMGGGREAAEPLSHEQGREDDQPGESVQGESGESEEEEEDESGCEWEDDPDGESEYAERRVDDRKHEDNCGDKNGLRGGDNNDDEQKSLEAAVFYLYANNPRNRFADEIQIPLGEDEKE…
LQ0AAB99YN16FM1.SCF	Esi0018_0087	417	E. siliculosus only	other localisation	0	48452	IPR013026		5 exon, 5' and 3' UTR	0.88809	1.24955	1.68671	0.0738559	0.282995	0.241092	MDPCEKATSFVRLAHMLEEQGNVKEAERLCRAALRTLEEESHLGPDHVHVAATLVTLADLLASKEKPQNPPLHKHRPDETTELLRRAVGIGESWFRNDLAHEKLALWRNKLAVAYTDQGKHIEAASQYLKVIEKCKEEPSIDQKAIVNVAHGGLNTLASIANFDEIMTQFMIYSSGDRQTRASGDKAETATSAATAATTPPYPPMSAAAPGVFGATNEAPVCANNNTAQTATSAVTAETTPPYPPMSAAAPGIFGAIDEAPGVAATAEATVPTTLGASTSTMGGGREAAEPLSHEQGREDDQPGESVQGESGESEEEEEDESGCEWEDDPDGESEYAERRVDDRKHEDNCGDKNGLRGGDNNDDEQKSLEAAVFYLYANNPRNRFADEIQIPLGEDEKE…
CL437Contig1	Esi0018_0161	60	E. siliculosus only	mitochondrion	0				1 exon, 5' and 3' UTR, 1 intron in 5' UTR	-1.12509	0.298985	-0.220132	0.15013	0.094909	0.380234	MRKVVPLELCRAAVYLSRCSFLLSSPPFSRLFEGCVCKRQVCAARLLCVAFHLLTDFSSR
CL7747Contig1	Esi0019_0008	246	E. siliculosus only	chloroplast	2				5 exons, 5' and 3' UTR, 1 intron in 5'	-5.74641	-1.8104	-2.51045	0.775702	0.224649	0.656299	MGMGAFFLGLAAAPLFLCSAFVPPAGFRSSASTAAAAGGFPASSREGPVLAAERLPLFMSVAGNGDGDHAQHQPDQKEARSSRAQFVGRVSAGVVAATAASGLAAGGLGVGAGPVTGKYSSKATARKRYLPRIVKLVNAFQMLKKDIASGSASPKSEFFVDVLADSVSAMDLYGSSMKKGETPDSKSRALQQLAQDFGSTCTSIGKSLGKKGGEEEASKAYDKASSILVKYLEGVELDPLGSDVYN
LQ0AAA17YK18FM1.SCF	Esi0019_0015	66	E. siliculosus only	other localisation	0				2 exons, 5' and 3' UTR	7.65361	0.627581	5.56545	1.02351	1.16855	0.335954	MLKEAAVSSGRRRFPHHRAYAVHTLEDLGAPARVALLVKPGSCGGVRGHITIHDYTVGASMTAFFL
LQ0AEA3YI05RM1.SCF	Esi0019_0121	464	E. siliculosus only	signal anchor	1				no intron, 3' UTR	-1.72584	-1.31747	-2.7844	0.57088	0.822916	0.383259	MNAHHKVEKRAENLEDEEDDTNQGLGDIEEEEEMKEKVHPGYFRRIFITFLWSAVLVVATAVAAILCALYILFSVVLWFVGLHMIYKWVRTNWTPESNDRPRAMPGQEEGDHWQRAWDLVSLRNHGVREDFDQAHFNVLPFLKSKTGLDRQHLAWLTKARDDKAKSEEDLIDGDRELPGARIDMEHLRKEAVGRNNGDGGKDSGDGGETKEAVGSGGGGGGAPSPEVQGGAVGDGVSGATSTAAAGSGGANEGTTPRAVAGGGAASPEVQGGAVGDGVSGATSTAAACCGGANESTTPSGASSPASTTSTSIAADAESGGPAVDKTSTAATLNDDKATGSGDTGGHDSAEHVQPSKGGPSSTLDGDTKMGPVRVTGSAAVVTTGSNGGRGGGGGDRGNA…
CL2143Contig1	Esi0020_0065	115	E. siliculosus only	other localisation	0				4 exons, 5' and 3' UTR	1.14742	0.17262	1.91201	0.208892	0.163879	0.498768	MGNCCDCFGKNDGTGSYLHSPRGGSGGGQRLGTAAEHQQERQRRADEAAAARAAVQDEPERIFDHNLTDSERQRQRELRAQAVEKRSQPKKPKAPASSQEFRNPNNDPNMLQWSV
CL6504Contig1	Esi0020_0081	682	E. siliculosus only	other localisation	10	IPR002153	PS50272	PF00520	5 exons, 3' UTR	2.89304	0.829501	0.195513	0.401104	0.625188	0.507282	MRPRDETIPSHLFQDDAGGTRVDSGPLEMALQARHQLELFCTQPLVLDYLNRAFTRGLPGLDASEAGAQEADQLKLRMQRNASVQVNAGDGESSGEFSRELLEVLEGSHPVFGSLTLSAGKQFILAQVVARPAFSYSVPAVRMAVDLLVYLLMLALFAKDVLWYEEGTVEVGEVVFFVYVVGAILVEITELWDGREEYMKDHWNALDVAALAFCGGAFLVRVYDPESLWGRALYCAGAPLLLFRTLFFAQFMPAQGPMIEIIFSLAGELLRFCTILLVTMMGFAMSFFALFRHSCTVGSFQTYWSTSIALLRAMLGETKLYDDFTVAAECCYDAVEPSDELHCEDFLMECCHNVESEHFNGLVGKALLAAYNVVMGIILLNLLIAVLSEAYVDVKENID…
CL3213Contig1	Esi0020_0117	258	E. siliculosus only	signal peptide	2				6 exons, 5' and 3' UTR	2.76623	1.09589	0.826296	0.584111	0.415134	0.548468	MAPTGRWNRMWFLLVATVVTLLSLHADAARLGGEGVALTRSGDVLLADGSTQEEYEVRESDPITAHFISLGSAAQKLLNKSGYAFGSLVRISHSDRDKEYGEGPERTAWFPMVVFLDVFGEGSGDNGEDITARYEVALDFHPKTIAAPGLVVLAAWRINTDGGVAAKLDVLPPEEKGFLEKNRPGITMMFGVIIASGIVKFLRRGIERLVKKAKADRQEGTATAAPGTEAEPSVAAARGKDAQNPKKKKEGGSNVKQD
LQ0AAB41YM11FM1.SCF	Esi0020_0146	188	E. siliculosus only	other localisation	1				4 exons, 5' and 3' UTR, 2 introns in 5' UTR	-0.321169	-2.40911	-0.306926	0.414842	0.164352	0.413934	MFSEEVPVPSGVVTQSVWIEDSFIKEGSLINTTVNVYFNDDNNYCGGFGCTVDGYVNDYIEGQDSLSLCQVQDGGELYHKDEPFDPYIPLSFDLPEGNEYYVTVVVTAKESSNPASNYTTMAEYGLDQVVVFQTDTTQPDNGARVLAGLSLMSLSWLILFNTLMASLGATSGGTQATMRETVVPATGW
CL1759Contig1	Esi0020_0162	75	E. siliculosus only	signal peptide	1				1 exon, 5' and 3' UTR	2.37983	1.77198	1.78275	0.154487	0.203605	0.35394	MVIWLLLASSFCGGTSLLACLSRDIFRWRNTVGPAGMAAILERLRHLESRAPLGSLQGVYLAKGLIVIGRRYERG
CL1949Contig1	Esi0021_0157	98	E. siliculosus only	signal peptide	2				2 exons, 5' and 3' UTR, 1 intron in 3' UTR	-4.2879	-2.46863	-1.10482	2.35163	0.359123	0.233128	MRLVNLFFAALAAPLGAQGFVVQHRTPLVASSRRVGSMTPTMCVPKEVAAAIVVAGAGYILTQGVPPAKAADMVPMSGSATASHARWTARHSWMALDL
LQ0AAA14YP03FM1.SCF	Esi0021_0167	762	E. siliculosus only	other localisation	4				6 exons, 3' UTR	3.41375	-0.114271	1.0665	0.493201	0.608772	1.48598	MEAFSKPADQELVAYYTSCEGANTFSDQLVTAYLQGSAAQGLLDALDDDEFATECPDEVESKETLDENIVLILAQIDSLGYLVQCGSVNPYFVEGVEEALCTDAPDAIWFVICGFAVVSVGLFVVAVSFRLLLQQKEEGLYKVIFEDEIEASETSSSYSGRSDDSWSRAHDLKKGSLAYDGGGRVQKGQEGSSSTPSTLPSSTPQGFGGGHHGVAAVAVSSSASKDLRQQQQQQQRQKQAVAGGRGRSTPVELATPLSRAAAAGGGGGRSGVPVEDFRQGGGYQEAAGARTGRGQRGAGSGAIARGRSRRSNGSSGNGRSGGGHIPMDNFASGRSSHSKLFRALAGLDDPEDEAPAVIVSRYADQRSTRNLGGPAGATTAGGGGGGGGAASRGELSGSG…
CL7310Contig1	Esi0021_0170	275	E. siliculosus only	other localisation	0				2exons, 3' UTR	2.51599	-0.654696	1.0015	0.196972	0.164447	0.348182	MCQGNSVLGFNWHQQEQLHPPPEKQRGGPDWQRPLSGGGGSSGSSPWASPSEVPSVTASSTPVALGLSSDRGTAGSRRQGYGGGGVSTESGCSGSSDHDAVLPARARGSWNSSWNSSSSSSSSSSSRGAKSSPVGEGASPHDDDEAGAGSGRRSAKRRLGAAASATASDEGTDPIIAAAARRSRGAKTAESGETGGSSGGGGGGGVAREVGNSIRAGSGGGVLRAAAGGEERDGASVSLGGRREGGRAADGGAVVSSSTWGRVGVRKARRTYGRC
CL7716Contig1	Esi0022_0128	227	E. siliculosus only	other localisation	1	IPR001348	PF01634	IPR013820	5 exons, 5' and 3' UTR, 1 intron in 5' and 3' UTR	-6.05754	-2.1429	-2.60968	0.380009	0.563562	0.413454	MATVTGNNSMIPADNVVMAVPKKGRLYDRCMKLLAGAGMDHRRPARVDIAQCSDLPVTLVFLPAHDIAMFVGEGNVDIGITGLDVVKETSDDSEIEVAMELGFGKCRLCVQAPVSAGITDVKTLSGKRIVTSFPAVCKAFFDQYDTPDNPTKIKYVSGSVEAACGLGLADAVVDLVETGTTMKAAGLEVVAEVMDSQCLLIVGKGTKHREMVDLIVRRIEGYITAEK
CL2235Contig1	Esi0022_0161	500	E. siliculosus only	other localisation	2	PF05179	IPR007852		12 exons, 3' UTR	-1.40524	-1.57614	0.352783	0.189343	0.456752	0.145356	MEALSLLRQCTMARKTVREEKDYYVFGHRRVPKDTPTAWKSQVQSEYYSLKQLVILLEHADAPMVTYIAACTSKGVKWVASIEKADVLAYLRGQTDDAAQIDKTAAPPSSERANKRSHNELQKGMTDTEMREAKKAHAQRLENRGGGGSRAGLLSGQDPLLSRGEGTGIGGISQDKLLELRAKRLSHKRNTIVSVGDDAADNPVDPKFLGADKMIVAKILANEMSISDRNSVLRKEGKSFRFALEYYNQASFYAFTRCTNHSSVENLLLGPMLISYFSHVRRKEKDQARENVDGYGKRKTRADREARQSGSGRGGTISASGGRGGSGGGAGGGGDLAGATPVIIVPTVPTSLVTLYNATDFLQDGNFIPTMDKKSKSERKPSEIMIERVNSQGKKMKFR…
CL7116Contig1	Esi0022_0174	173	E. siliculosus only	other localisation	0				1 exon	4.71186	0.537837	2.24293	0.49453	1.87652	1.09858	MAMLEEGSPPRPAASPGRRQQAQTRMAAPAHEDMTPLPDVEWQGAGGAGRGGRRGPRHWRKASRGGSGGSGRQRRLRRSEVWERKQQRRQWRRRRRRRGEQRRRRGGLVPDTGLSPATSAGGGGGLAEAAPAQETGGRGGGRVARSRGAGARRRCPETREGLPCLRLGERGFV
LQ0AAA5YP01FM1.SCF	Esi0023_0015	61	E. siliculosus only	mitochondrion	1				1 exon, 5' and 3' UTR	-1.99973	0.561705	-1.38389	0.382092	0.748146	0.342843	MALLVLCPSSVLAGGHKPAPFVRRETCPDLVGVEKSSISRGATRKRHVSDVLRRNPPIIPR
CL3954Contig1	Esi0023_0114	876	E. siliculosus only	other localisation	15	PF02415	IPR003368		2 exons, 3' UTR	-1.73189	-0.541375	-0.342321	0.163258	0.757212	0.655497	MATLMSTTVSCTGETTSTFSGNSAAFGGGLAVIDGSILSFGGHSYFMDNAAVHNFTNNSTTGHGGAMYVSGATVSWIGETEFSNNSALTYGGAMFVIDSTASWIGETGFFNNSASKYGGAMYVVDSTASWIGETGFFSNSAVAFGNATAALGGAITVGNSTASWDGNTTLSYNRVEQVDESDPSSGGALYLFSGSNATWGGGTTLFEGNVAAFGSAVRMASSSSASWRGLTKFVGNSAVTWGTLFLDEVDVSLAGETEFSGNTAQSGGVMFIRNASTASWTGVTNFTSNQAFFDGGAIVSPQLDSEYNPSESTLNFNGTTTFFNNRCGGNGGGMALYGGCALVIDTEMGISFIENTAAVSGGAVFVSSAGTGLAFPTTSFVSNSAQIGGAVATFGSGGS…
CL2694Contig1	Esi0023_0184	264	E. siliculosus only	other localisation	1				3 exons, 5' and 3' UTR	-1.61495	0.708256	-0.613526	0.186769	0.331182	1.21291	MPRLGDDQNMATAYPDRVSTNLRGSWMRQLAMTVVGTLLLYNVFFKDYKNETKTGMSNRGIAGDIETIIPKTRAEIIKEAKENKKTMKEKNEALHYQVGNLTNAVIELQEVLVETNGVTIQHPVTLPEPEEGEGEDGGGGGGGGGENNAVEGVRASQDGDEGEDGNHPKAMLRGAETGQEDNYGGGTGDAADEPKNGGGGGGGAGGRRLSSPLPKTKSEAHGRRPAAAGGGDGSRSRQRLRRQQQRRSRREESSHHPGEGDPAR
LQ0AAB21YD15FM1.SCF	Esi0024_0112	288	E. siliculosus only	other localisation	2				1 exon, 3' UTR	-8.31955	-0.970114	-2.29406	0.182156	0.775708	1.61668	MVVRPVHLDGTSVYGLSTEGLVRRHDVETIIVNGTPVKPPFAQAWMQLPSWVTQGRSGGVAGAPGMISVSSSSGDVWGGMDDFNRSGRRRSGGNFERRIPVDLSGTAMAFQGLAGVRAASITRRKKGELAAVGFDASSSRSSSGSNDGGGVMIWKASSEGAGGGSAESGNGGGASSSPPDGRGGSDQDKDDTSSRGDTTNDERNLARNKKKKKKKKGMWPIDYKGPLACETSFDCTGGYVCCDLVVVKICCSNGVMQRKPGDLIPSLIPIPGRGRTELDQCQRQLAPQ
CL47Contig1	Esi0024_0145	69	E. siliculosus only	other localisation	0				1 exon, 5' and 3' UTR	-2.41037	0.17238	-1.1435	0.494202	0.821782	0.269207	MHARETTSKKHPIFYRVAHDLKKSPVENECKCVESDKRVTALTACRSTTKHALDTLLGQLRPLGRMERC
CL893Contig1	Esi0024_0155	256	E. siliculosus only	other localisation	1				8 exons, 5' and 3' UTR	0.171617	2.0052	0.653452	0.371576	0.285653	0.415076	MKAPSYGWEGAAVMCALHKRPAMVYLRHPSDSSSSGKGSAGVKPTADKGHVPKGLEYIPSVTMDSDRVVHSDNPHCAFKGCTKAPSYGTEGQGGVHCFSHKRPGQVFLKRGTKPAGTAGTAAAATTATTVPSESMRNRVTTAAEYDDLKEQEEGSLVAVEADLAEVQRCVALSRRQGEDSTVGVKYLRNVLNHPDDVKYRTLKISNKKFYTEVWLNSGMRGLFLALGFRKRSGGIVGLDPLAPNTLDCVAVALQAR
CL2937Contig1	Esi0025_0068	213	E. siliculosus only	other localisation	3				2 exons, 3' UTR	-5.07786	0.518428	-1.22619	0.532336	0.342304	0.320503	MIAFLGLFACCACSNNKRGRAPRVGAAAAAANVTGPGGIPTATAVHLDDVEKNASSKAGGSTTAHAVGTPVGAGGPVDHKPSESRPLLAGSGATGGGSWWNRGRPTRGGLPANSTTYQGATTSGRGDSDGGHHSTAAGGTTGRGDDHTSTAHGGTSGRGGGGGGGGVFGGLFGGGGGGGGGSHSSTASGGTTGRSGGSGGGHSSSASGGTSGR
LQ0ACA5YF10RM1.SCF	Esi0025_0093	41	E. siliculosus only	other localisation	0				2 exons, 3' UTR	-2.14375	1.62624	-0.386707	1.12814	0.265002	0.556354	MVNRAWNAPELFRLWEENMSIDGGRSCARSTETAGKRRTML
LQ0AEA9YO12RM1.SCF	Esi0026_0097	52	E. siliculosus only	other localisation	0				1 exon, 5' and 3' UTR	1.6538	0.334121	0.812074	0.151725	0.237449	0.211842	MSEHGGELFAKGHSICGCKGGQTHSRNSKGCDSSNFFLGPTHTHIVGAFHVF
LQ0AAB54YO21FM1.SCF	Esi0027_0111	95	E. siliculosus only	other localisation	0				1 exon, 5' and 3' UTR	-1.42914	1.15733	0.500585	0.22827	0.191144	0.320679	MKNDQPYGPAPPPLATAPPAETAAVSPQRQKRLLTATTNEADSGGGSSDSDDEYPEGIVGDHWPHPPCDLEAEIGGGVAMAPGNCSKRPQRGVLW
LQ0AAB40YK13FM1.SCF	Esi0028_0029	528	E. siliculosus only	other localisation	2	G3DSA:2.60.40.150	IPR008973	IPR000008	6 exons	3.00816	-1.95405	1.22056	0.445671	0.462316	0.803212	MPPTPHRTRVRPSPSTSKSPRRRGLAAEFVDSDNDEASCCARYHVSVRSAKNLKREGFRGLTNPYCQLNVGRQGPYTTDVVFDSVNPSWENNRQTFEFREAKGPQEDKLTLACFNSGDVPELIGRLSVALSHATHKVISLPMFRKDLGGSQVWAGSVEIELHYIPEGEAGSPARGGRVGRPALDETDDVNRGGNNPYPPMSPSATTTTTTSLASSFVKAALSLPHKPRTSGGAGDGAAAAAVQAELLALSPRTATRGTEKKKAMSATKSPALARVSSLPGTEKAAASSCSSSAGAHKGGGGSDRYGSAAAVAQEDLLPLSPRMARGAEAAAAAAAAAVAEAARGRGYSKGGSAGGWSWKSFFCGVVFSALLVLGGLWAVGVPLLSGQLGFGLRVLEDGE…
CL2706Contig1	Esi0028_0031	54	E. siliculosus only	other localisation	1				1 exon, 5' and 3' UTR	-3.99043	-2.17534	-2.84978	0.492094	0.769828	0.258387	MSSMGDLSITGGAYVCFFCVFGERSSYGGAECHTLVMLPIATRTNFSFQGWCTA
LQ0AAB44YO21FM1.SCF	Esi0029_0025	513	E. siliculosus only	other localisation	2	IPR001525	IPR008973		8 exons, 5' UTR, 1 intron in 5' UTR	-3.98569	0.809577	-1.70382	0.288247	0.799053	0.417973	MAASSSSSTSSRSDEVWHRRLWGSVVGSSRGRSSNALSFLERSDRSTDSPTVAAATTNPWPVGFVPPQGTKSNRTTGWSQSYTPYLPRTSALAFLERAPGRARGNNIVGGAGAEDGLGTLSGGMVAAGADRGGFLPRPYDTGSECSDAEEDSDICPSMLYSCFPCFNWSRRGKRRPADLLDGGLANSVKRESRAQLSLSTPLLTEQPPSPTNFPTDVKLIEVEVESARNLPLGERVNMADLAGTYAILRITPVQEGVGEQVNQTSLATRPVNPSWGGRETFTFFVTDVAGSKAFLSLQLLYRPLRPPPAPQPLQPPLPLRRGASEASLASVSSGSRHGDVTIAEGFVDLLGLFSLVDGTYTPGTMKGNARRVAVPMREPKGKRLYEYERWTRVAGWSTA…
CL403Contig1	Esi0029_0052	483	E. siliculosus only	signal peptide	4	IPR011050			6 exons, 5' and 3' UTR	0.496125	-2.37189	-0.096983	0.358268	0.388307	0.361488	MGFTRKSAVLALFFLGLAARQASAVTTCLALITAVEAISGTGTVELEGGFTCEAYITVAASQDVTISGAYTITLGAPFAGSTNTDAGGSLFENEGTLKLDGITFATETTDGNRAVWNTGTLSVEGCTFELYPTGIFLSRGGVIYSDSAGTISISDSTFKSNLASERGGAVYAIGSETLTITDSLFRGNEVGTGVAADGAGGDVYAGTNVDLTVTGTTFSTSAAEYGGAAIECCGAVISDTVFTGADTASDAAHYGGALLVNRPDQDGCPRELDLSNSTFSGCTVGSTTGAGGSVAIFDTSATITDCTFESSVGTAVLFSSSSDSGEHQLLMDYVQFNLNTFPAEAYATDTEQGAAIVVTNTGVADGETTVTMGEFNDMYCFANEPYECEFVYDQSDIVH…
LQ0AAB104YB24FM1.SCF	Esi0030_0173	74	E. siliculosus only	mitochondrion	1				1 exon, 3' UTR	1.72191	1.23576	1.17176	0.0754166	0.349153	0.571844	MGMNVNALFSCSRALPTAASARPRRAEAAAAAAAAAAVDARPEDGPMGRDGGRMRSAQIVVLDVLLMVVVFKGV
LQ0AAB1YD15RM1.SCF	Esi0031_0056	258	E. siliculosus only	signal peptide	1	PF08888			2 exons, 5' and 3' UTR	-3.18935	-2.49443	-1.25657	0.564715	0.842211	0.232958	MRSSVVLICAAALSLANGVNAFFVPAAARLVGGASSASRVSHIVSTSSIAHGARCSCASCAGVHGRSCSCPSCSSAGISGRSCSAGCRCTGCSMRMKAQRDREDTTSPVGQRATCQCPDCGVLKSRPRSRGAASSVMMMSMGGGEGEGVLRQRLADEPESVQFEDTMAAIAEGFDYVPKRFVNGETSSDAGANEGSCKVFAFGKIVGLSPEDTLACFGEHYRGVLADPDGESHGNIRAFVASGWGGVDFPDGLPLSHK
LQ0AAB87YM05RM1.SCF	Esi0031_0080	51	E. siliculosus only	other localisation	0				2 exons, 5' and 3' UTR	1.52851	0.402328	1.39425	0.247538	0.512188	0.512986	MPYDIPAAPGYEDKPTKPDAGDDSSSGPAAPSGGGDSELDDLAARFMNLRK
LQ0AAB40YE03FM1.SCF	Esi0031_0122	270	E. siliculosus only	other localisation	0	57850			7 exons, 5' and 34 UTR, 1 intron in 5' and 3' UTR	-1.21249	-1.30701	-1.98989	0.0910076	0.436333	0.197837	MPPYRGGRGGGAAGGVLSRGAVQQDNQMKEILDDITAGTKELAGTVGMQENSGLDKEVHQKLAEQVQQLAAQNAKLEIKRAATASAMKTLAAEVDKKTAGGAAAAAAAAADDPPPEEMDMAYFLESMTSKLSSAMEGADEKALESKEYKDLMKMIVATAMDDDDDIIVPNDNRVSLKCPLTSSTFVDPVKNKVCGHTYGKKAILNHIRVAKNDGGVSCPVAGCSNKVVKADLVPDKDMMRRLKIEENTQHTQTAQDAEDVEDDDVAESFI
CL7151Contig1	Esi0032_0118	314	E. siliculosus only	other localisation	1	IPR002164			7 exons, 3' UTR	-6.55016	-2.0874	-3.4303	0.500903	2.10662	1.23395	MSRALLSEPPAKRQRAQGEGDGNADRPGLAEEDQEFQRLEAVSNVQDELNALEEEEAQQVLLVHKAFLKRKRPLYIKRQEAIAQVPDFWLKVPYISDGDQLALSYLEAVAVHKATPTAAAVAASGAAAGAADGGKGRKSGASEEEKEEVSESVGGEGGKLDDDDDVGFRVTFTFRENPFFSNSELWREWEPADEKASFSVVNWKDTDESRDLQSCLLWNLDPALHEETPSFFSIFGDDMEDYELGEALRGDITDNPLDIYMRHDFDAEASEEEEEGGAAAQPEGDGEGGEYDSGVNQIGGGLEEGGGDTIVDEG
CL5551Contig1	Esi0032_0155	238	E. siliculosus only	other localisation	2	90193			3 exons, 5' and 3' UTR, 1 intron in 5' UTR	1.66943	-0.265215	0.61669	0.141844	0.114617	0.191827	MRLETGSYTCGYYTFNCEDPSVSTDCSTTSTFDSDDWYGGYGYYTDDIWDSSDDFYGTDDLFNYYDSTTCTSSFVGDGWCDTYNNHADCEWDGGDCCECDCVDSSYSCGVVGYDCLNPTSPCSDSPGTPSPVVLDSEARDAESTSTSTSSSSVATWHVVGGFSGAMLAFCCFSGIVYSACLRCRGKLGDAEDEQGSDGGAAAAAAAAAAAAAVATTGTQPAEPEGPATAAAAAAPAAK
CL5013Contig1	Esi0033_0045	357	E. siliculosus only	other localisation	1				2 exons, 5' and 3' UTR	-1.47267	0.363665	0.255514	0.213293	0.0528836	0.0940406	MLPPTDMVLSGGSTTSGGPSSADTSRGILDGGGYHQYDYPTASSLLAASGSAGFGTTMDAPTDTLPMTMAPLPEWGTVSGTDNSVMMTSTASPPPSFAAASRPLSPPPPYCGSAVNPTSRFAASSAASCAESGGGSFPLGRDGGFHEQQQQHEFSKPLVFGTAATDSSHNDSIQGGMTLTEHLQYHQQPHQQYQHQREELRHPQSEQKHQYVASEGDRGVEVAYGGQPNQQQQSQLQQQQQRQIHQQQHQQQQNQPQRQQQQPHQQQHESQQHQHQQRQEQHQQQQQQQQQQQQQQQQQQQQQQQQQQQALEDLVPFDELLDMDLLDGDVTSNGAGIETDNFGYDFDPDLAIDFGML
LQ0AAA8YI04FM1.SCF	Esi0033_0100	162	E. siliculosus only	other localisation	0				4 exons, 3' UTR	2.25891	-0.166925	0.185707	0.386204	0.353161	0.29002	MYLGFWNHRSTEAGSSRSFLGGSGVLRTYCVRRICRTHRSFSRGGSQPAAPLPAFFSTAARAGETRKKMDNQRSGSTQGGGGNNGGRSDGALTQQQQQQQQQQQQQQQQQQQQQQQQQQQQQQQGLAQGGDGNGVYNDSQPPQVDNGGNDAAGGQKWTYYYF
CL1243Contig1	Esi0036_0079	67	E. siliculosus only	other localisation	0				1 exon, 5' and 3' UTR	0.40107	0.0872725	1.70272	0.527703	0.805462	0.267552	MLRKTKHPDRRHTVMSYCGHWYRFLPQRLTRARQGERENCSPRAHVRSTLSKWKSACIWFGHHFLRR
CL367Contig1	Esi0036_0089	196	E. siliculosus only	other localisation	1				3 exons, 5' and 3' UTR	1.24775	1.88096	1.46099	0.303526	0.173134	0.182882	MNFIKKVTGAGGDAEAAPTPAPAPTDAPTPSPAPAETPEQTPAPAAGIGMLAGVIQSVVGGGSSSSSSGTAAGGEAPPAPPAEAETPGIIGNLTSTITNAAHSVTDAATGIVGGGKKGGADAAAVEVPAVPAVETPEEGKEGGGIGGFLSNVTHTVTDGVKGAMGAVRDEIQADIKPSLKDDPAPADAAADAAPAK
CL7471Contig1	Esi0037_0032	168	E. siliculosus only	other localisation	0				3 exons, 5' and 3' UTR, 1 intron in 3' UTR	3.75432	1.06914	0.756415	0.648199	0.318725	0.257414	MQYWKPGEKRPGGGEGGGGPAGDGGGSGTGRVSDEQGRTDSKKKKKRVDKSRRDGGGRGSTDKGNRRSSEGVKKRVKKGKGKERHSTGGGLGGIKGEVSRAASKPPVAGPSQGLLAMKFMQRKVQADEAQKQRQEKREKLESYFSSSYAKRLKADKDTGKDRRAYLPT
CL62Contig2	Esi0037_0121	172	E. siliculosus only	chloroplast	1				4 exons, 5' and 3' UTR	-2.24682	0.0523768	-0.229938	0.189924	0.149602	0.139852	MARFSAFAFLAIFTSAATAFVTPLAGVQMGRRSASANVATTRMSASPAPMTAPPTAQELKDMALSCQEDGCSVETVSTLLNQLKTKKKELEMQLVTVDDVLTIMGDSSSLAEKGELEKLVEAVGRVFSTNDGTDYIPFPTGYSGEVNKKQKDAWDYNVNTPLKPVKPVYKKE
CL4728Contig1	Esi0038_0073	524	E. siliculosus only	other localisation	2	101960	IPR000825		8 exons	-2.67533	-0.300611	-2.2662	1.84495	0.830145	0.259446	MERTAQRSRNGGSESRRVSTLLAVAAGLLSLAPTADSFLSAPMKGAGGSGAAQGLRRRSTGEARSAQAGRQGDGVLSATGVATEDNQGAVAGSLLETQQKGVSNNEMKPFVRVPRRDPRMWFDAIREGAVPRPDSLVELSKAGEAELAELALPTRKQEPYRYTDLESLYRTDFTSAAPTTTAAETAAAIKPHLLEASQGQQMVFVNGVFSDELSDVSALGGVEGLVAGHIGAIEGAPLDQAKEMLSYLPEKDADFRTTQGSLAFASLNQACFADAGVIMVADGVTVEKPIQVIFFSEGEEGPTVSHPRLVVKAGADSHVTLTQSYLSRGGVCLANGFTRVLVGDRATVTHDYAEEMSASDRLVDTVSVDQTTNSTYSVNQVLSGAFDARANFQIDLLET…
CL1376Contig1	Esi0039_0036	128	E. siliculosus only	chloroplast	1	PS51257			2 exons, 5' and 3' UTR	-2.7469	-1.38432	-1.78493	0.505125	0.263913	0.101665	MRTSVTSFIAAGALACSSSTSAFLFPSAAVGLRSAARTSVASQSIISRSSSGRRAVMLFAEKEDGDEEQEPMDLDLEQMFEVFEAADKEVSDEEVGKKGDKKPAAGAKDPAEAMGDMLSSFFGGGEKK
LQ0AAB49YI21FM1.SCF	Esi0039_0144	143	E. siliculosus only	signal peptide	0				3 exons, 5' and 3' UTR	1.97244	-1.67802	0.9635	0.361039	1.1546	0.246207	MTALFDSAGYSEAGVWRRRLWAMALLKLLPSANSGVIKNLDQIVNICVDVLTEEREDGGKRLKESLAQPPVGEPDSASASEPNLLHSRLLEALQADVAVTTDLKGLVRASMDALRATLGDQGWQVAVETVEPVVLRELQRMVA
CL556Contig1	Esi0040_0051	471	E. siliculosus only	other localisation	4				5 exons, 5' and 3' UTR, 2 introns in 5' YTR	1.24601	-0.0703484	0.26084	0.0555456	0.349143	0.393595	MAASELARLRGVEGVHELSAMRADATASLGARVAQRDNGERPMEEADDATRAAAAAITTAVTVPAGHGNSGSRRLQADESCEVGASFELSSTLYSAFNGCYASLDSTLDPYFFWTESFGAFIGPAPSIFSSTSMDFTTSDNPLAWKLGEVLAIGNDGAVYYSMACESFEYVAIGSHPSDVTQWICYLAGGWVYVSADSFSLTCGCSDNPTPAPESGSTTPSPAYSPTSLLNPDGTTPAPVTSPVDDDGSPEGASGCGGTDEFTISSSELEEFDGCYVDAGETETFFSTSGEKADGVMAVFPGFLDEQETADARWIVGTYAEDADDRTVTCVSDESPTTAHPADSTFSCDLTGTGAFITVTDVLFGFTCGCTSASAGEGDDDEATTTPSPTGTERSLDDT…
LQ0AAB32YE05FM1.SCF	Esi0043_0107	183	E. siliculosus only	other localisation	0				5 exons, 3' UTR	-1.23995	-3.35139	-0.983098	0.421261	0.434528	0.509301	MIDEWVLFPVRSGYTSENRVQLDPAVAIAFDENGEVSPVPNDDPIMDELFPLAEACVADLGPGVTLLRTPTTLTVQGLNELVDEAKDREAEGGDPEGEGEEKEEAGEAEEEEDDDDDEEDADEVELLGEFLLEGEEFLIVRFLEPILILAKEHTPGNYLLIDEEEEQDAIPLVDEMLCGDATI
LQ0AEA8YN04RM1.SCF	Esi0044_0052	445	E. siliculosus only	other localisation	1				2 exons, 5' and 3' UTR	0.723202	1.60606	1.29926	0.523776	0.158652	0.308156	MCLLVYIHTYIPAHLEPLPCFFLFVTAPGIAGAWGQEAAQPSWGGKNNSYQQQAFNTFRRAPSPFGSHGPDGRYRQPRAPTTTTAAPAAAAAAVDREENGADVPLPGRRGAGDGGSNDVGLASRSDGSAEASASCSPGDRAGGDEGGGVSNVGGGDSSGSTRSAEASAAAEAAAAAVPVPVPAKGAPAPAADAAAVKPSHENDERGLRGKDESATEACSERSASSTSYSIAWTAAASRVEGGDDRGAGPREAAAVEMSQQRGCVEERGWGSGRDDAGGDELGEEGGDPDQGWAMSAEWEEYLRNSPGVSRYRKDGRGGGGKGNGSKRGRKKRGTGSSTSDNGSSSGIVAADLDPTMTTDNRGHTNTKQQQQQQLKGGKAPPRGGKSSGKKRSPKERGKS…
CL4990Contig1	Esi0044_0120	357	E. siliculosus only	other localisation	5				6 exons, 5' and 3' UTR	1.46471	-0.182466	1.67897	0.117489	0.535765	0.311353	MSDAAMKVDPDYYNRSLLETDTRMDQSRRAAATGAGGAHSAPSSWGAGGGGVGGGSVGGRGGLPDLPDYLVRQHSLLGLYLSLNPGDEADAERHWGFPQHQRAALVGATVVVPLLLAVFLTGKSFSFCGFWSWLWKASVIAVATVGARLVLSFALATFPDIEVPFQGHVLAVWPHFTIGTLAVMALIWFVCAAASGTGWSTLWLAFTSLLLLACAEAGLRGGMWHFQWWEPATRFSFLKPWGDAYGPVATGPGRGGAGFGTPQPSSYAPPRPMASSAPAPAPRQAEQPYRSPSGSGGSEGVAVGSVGGDGGDVVGSGGVNGGSPAAAVVAQKEESSGLLEENSKEMGDLEDIFSESV
LQ0AAB99YM17FM1.SCF	Esi0044_0127	331	E. siliculosus only	other localisation	1	IPR000209			4 exons, 3' UTR	4.86259	-4.17054	-1.50056	0.216803	0.199015	2.02324	MGLVSFLASKPEVLRVAPRQSQALLNAAARANIQSATVTDTPLTDAGLDGTGQVVQVIDSGVDESSCFFAHDESGDHVPHGHYFEEWGINPSLTSSSFSSPTSDDDDDSWWWPWATADHHTGSYYQIAEEFDGGDFTIYPDRRKIIQYINLIKSDDTEGSHGDSFTTSLGQQYPWLSADHFEYDDEAGHGTHVAGSVAGATLNTPAELISCNDTETMSCVGACVDDDEANDVDDLATPYVEIADLDRLCPLFSDYDCDGLETDKCLSDDVAETLTNNGGMAQGAKLAIFDAFYDTFGLSPFVGTGLWEPCADADCKIHSNSYGGDFEVFRV
CL141Contig1	Esi0045_0021	192	E. siliculosus only	other localisation	0	IPR001202			3 exons, 5' and 3' UTR, 1 intron in 5' UTR	2.73007	1.10005	2.56616	0.302728	0.406853	0.229503	MASFNPQEWTPGYDEHGVNCWFNKTTRGRVYGRFPPQMQVGLSPIVGGPGVNVPASTQFNPASPLEAEKQWKQALAGGWTEYQTDGDEKKPYWYNEISGDRTWDKPDTNGAQKPPPPPPPAPSSQPSVSSSQPREPSPHKDNGGKAGGAGQKKKKESEQWQQLRTEKGRRYWYNEETGASQYDTPNCLRKYR
CL3551Contig1	Esi0045_0065	185	E. siliculosus only	other localisation	0	54001	IPR003323		5 exons, 5' and 3' UTR, 1 intron in 5' UTR	1.96202	2.15433	0.936461	0.320391	0.308735	0.560129	MPDAGKLILYPRELFQAIPNGGKGDCGPAALWHLIYGGRPTSRDLKEMRNQAVDQVYSHPTRYMDFFDGETEGRRKGMLYKWTRLMRQKGEWADQLFINAVARAHEVNIRILVPEKNNTLRDEQGNYAGQGTARRTYYMLHTGGNHFEALKALGEVKPIDGWTVQEVMLEEDRSSSTSPVRAGDQ
LQ0AEA1YF21FM1.SCF	Esi0045_0069	378	E. siliculosus only	other localisation	4	IPR011046	PF00400	IPR001680	4 exons, 5' and 3' UTR	3.52915	1.98834	1.51871	0.357759	0.229958	0.550732	MGSFASFPALYSSLRHTDWISCCALVPSATAGVAPSVAVSGGRDASVRFWHKSDAAAAEAAAARAASDALAKESAQGKRKSSLRAAFASGSRSSSGRDLGSGGGGGGGIVPPGDGGWSLASSVATAHGSSEFVTCCASPGGSSGAAGGWVATGGTDWSVRLWDVVKFRELGRLSFMGHSHPVRSLACSSDGKLLVSGGDDHKVIVWSPQSRRPLATLKSHASAVHGVAVDPGTHSGDAPRWIASGGGEGFLLVWDPRNFGSPVAILRGEVTAADPSSLSEAFSSGMSVAEREGGLQGGLAGARSRGESGRWEGETTGATMLNAVNCLAAGGAGSGGDWLFAAGETVVRSWRRRDGVWHGGAGLPGEGLGGIASLSVIE
CL1119Contig1	Esi0046_0093	50	E. siliculosus only	other localisation	0				1 exon, 5' and 3' UTR	3.56104	4.93847	4.02788	0.601313	1.10241	1.70762	MHRHVSWGRGGFRNVVFRVRSGGMLLQTGLETIRGAAVSRHPSASERCRR
LQ0AAB40YB10FM1.SCF	Esi0047_0081	421	E. siliculosus only	other localisation	0				2 exons, 3' UTR	3.91964	0.182275	0.802479	0.462396	0.284337	0.471829	MGAGGSSSMKRAVSSMDAWGVRQQGGGDEHVRLKRCKSAFANLKALSTSAGAAGVGEDTSDRGLRVEHAIVPRLRNFFGQRQQQQQQDGPSSPTRGGLSRHRRSTGEKKRGRSGSAAAAGKTSLMFGSTTARRWPSAERSAAMLAAQHHQHVAPLQHGTAAAVAVASTAHKRLFGSGSSSSSSSSRASPREGVATPTAAGGCSTTGINRGLGPSAGGGFSSSRRSFASSSFDTFSTVHEQQQPSSDTDAEPSCPPSGGTRCPFLQHELQQGSEEEARGGEGSPGALLMGGGRSEEAAPTTNGIEFSGWMSEPAAGSCSSGFSIVGFDDDDEGGGVGGTSDEEEMEEEWCPTARVTDPHGGGGFGDATTGGGGGESTCPPQQQQQQPREEGLGESPSSSP…
CL2124Contig1	Esi0049_0015	240	E. siliculosus only	other localisation	2	IPR001020			4 exons, 5' and 3' UTR	2.25587	-2.54564	-1.53715	0.168617	0.748068	1.58494	MKMAWKSALRREPVDLLRPNPLYLDSVGQLIEAQEGWKDGGFLSVQWRTETSTGNLTECYGLHVRSAVEERRLSLGFSRSQVFFNTDLVGETSTTYNATVVSANNGVVDAIRGDYPCAMDNTVYDILNDERDAGVKAIISGLISASADFLLTSSFNGTGSNECQKPHSKYIDLVTDWRLEVVGKDLSSIGQMLPPPLLVEGGGDGQPLALLVLLAGLVALAAVLVWDQRVIGRPRSKKVP
LQ0AAA4YM17FM1.SCF	Esi0049_0063	173	E. siliculosus only	other localisation	0				2 exons, 3' UTR	4.34681	-0.981598	0.302118	0.427718	0.845441	0.606331	MWAVATAGDRRAGRHEFVDAVHVIELRGNFAGGAGSSSAGAGSHACRDASVSSDCGSEKCGSEGGGDLKGMAFLPPSPMDRNSPGGGPGLSSAAWDSPSPRRSNGGGGFSGGGIGSTASSTPSSGRRVGGGGKSSGSFSPRGGGRGEGGAGLLFAPQLSDVPMLSAGNGGHRA
LQ0ACA6YO11RM1.SCF	Esi0049_0121	341	E. siliculosus only	other localisation	0				1 exon, 5' and 3' UTR	1.15495	0.300482	0.434403	0.193885	0.162059	0.202095	MPTTPPSYQQLPSGPQPANPPASRQGRGDTDEGKVAQVSECLGDGVVSADEAATAVAAPSGSHAEALLSELGDGAPEKGAERAAAGGTSAETQPAEGGAREETLIEEKEKDVQERGREQEEAEAEEEVSGEDGLGVAQKQENDEVQGADLSSFEEQPTEATDGDSTAIAVAGVAPQAPVSGSTTADATGKRQQLQEQVDGGAEAGAGSTRATATTPERIPCSPAASATSNSAPGEQSTHTAERWGGRNRETSGEMKTEDRGKDRETKTKKVGLWELKAERSRLEHALVEAEADRDVERARATEAADRVEEAIARLESLRRRCGVEGAVGTDDAAAAAGLVG
CL5599Contig1	Esi0051_0064	59	E. siliculosus only	other localisation	1				1 exon, 3' UTR	0.859633	-4.49149	1.61013	0.240941	0.553161	0.4491	MYVPKDGNVRRTTTASVFHIVIQYPASGWMLLGDCFLGITSQVVWLLDEHQGISCSGKK
LQ0AAB98YN10RM1.SCF	Esi0051_0121	71	E. siliculosus only	other localisation	0				3 exons, 5' and 3' UTR, 1 intron in 5'UTR	2.58474	1.11424	2.15474	0.454959	0.335439	0.346929	MFGGGGGAGYMEPRFDPYGPPIPGQQPWGPGVPGRGGGGRGGPAQGGPRGPPGGPDNDHLRPPGGSGDMFF
LQ0ACA13YG17RM1.SCF	Esi0053_0002	390	E. siliculosus only	other localisation	0	PTHR16196			3 exons, 5' and 3' UTR	1.46096	-0.261694	0.288928	0.209306	0.450045	0.207934	MSGRLIILPKKSWHPGKRENIEKVLRDERLAAEEAAAARERAREITQEGIVETLTKKRSASETIEGEANAASGTPASRRRRGQDKRRSQDRDEEALGGKGQGWGATLQHVNLFSDAEREAGKILGQNSDHQREKKEQELQRQQRSGLAPTALGEGSAELKDKESQPWYTQLQPQSTACVSKVAARTVRLGREVTGQEAEEAIKRDQGRKGQADPMGSLFRSGAQPMRGSLPLERRGTSYQPEAATANLPGAAGLCVDEATSHSNRGKHAGKAKKVKKDKKGKRDKKKHAKEKRHSTETRTRSDRDRFARRHSDSAAGLSGGRADEATDAQREQKLKDLRSRRLAREGGERERQIRLLAEREMAGQSLPDERTRAYNNQYNAPAARQNRIR
CL2614Contig1	Esi0054_0015	52	E. siliculosus only	other localisation	0				1 exon, 5' and 3' UTR	-7.35273	-0.599854	-1.88319	0.880537	0.105135	0.494979	MYVDYWCSDGIRDCCSGWILRRTSGIIPFGHHSLPRACCKYCSLGVDSCFAC
LQ0AAB41YB06FM1.SCF	Esi0054_0104	528	E. siliculosus only	other localisation	2	IPR003690			7 exons, 5' and 3' UTR	-3.99183	0.113707	-2.69208	0.332167	0.617127	0.78277	MQPLIDEGVPPRVEAPSPTPAADAAASAAAATAAAVVDLPSAFHMHGAALALSGTNPPFVGSTVFEAFPTSQTSDTRNGSGSGSGSSGSAAFLDLHGATTPLSELSAASEHLGPHDGVLPSPTLAGCKRSQPTGGWSSSNDGNDQERAAAGADSSRTCMRRNQDHDHSEARPSRFIMQGAAAAAAAAAGVVGGKGEVGDDFLAAGGGSSGTATSGASAAEEMELDVGDTPVAFPQTAATTQHLGHDATRSSSSEAPAATFVAEPSTAGPAAVVPAAPAETTATAAAAAAVFVPGVAAADAVDGSASDPVSCLGDYNFSFEELNKMSKRYPTVNTLGDKAPMPLLGWLTRELDMNHFDMRCLILRHPRLMAYRVTSHVAPKTKWLRERLGLGQAALRKLV…
CL6712Contig1	Esi0055_0021	220	E. siliculosus only	other localisation	2				1 exon, 5' and 3' UTR	-3.51663	-1.13902	-1.76576	0.656334	0.685768	0.447899	MEMLSVPKRGWQGRVGGVAPTTKVSGSTGRQKAPRRTQRSVDTAISGGAKAGPLRAPKDHAQFQRDWRRRCCTNGERRDYLRLIGPKNVSALFRVEMEPDVLGQVLSVVCQEFPLHPQRLDTAMPATPENEERSGAPTRGDAGGSAAETANGSASADKAGARFCVEWLWALSRTGRFAVNILFLADKEKQELARAFDLISAVLGDEDDEEISSLRKAYAV
LQ0ADA12YC02RM1.SCF	Esi0055_0046	161	E. siliculosus only	other localisation	0				2 exons, 5' and 3' UTR, 4 introns in 5' UTR	-6.25097	0.557051	-1.16815	0.214794	0.420671	1.06854	MAPPPSPAGGPLNDGCRRDRMLLFRGAGRINGERGGAEGAASNGAAAAGRSSSEEKQLPTEVDELVKSDRISQMREIFASAAPENLFKALDTKDWDVAAACAVFGDSTSGDSRPKLDVARASVPGASATGSRSGLFFGGVAQELRGLQGLDAWSFRRRSSM
CL1465Contig1	Esi0055_0093	51	E. siliculosus only	other localisation	0				1 exon, 5' and 3' UTR	2.03093	-1.77689	1.13029	0.152822	1.7174	0.240098	MVSGLCLCGRTRRDCCREGGNGKRRRGGRTNSGLAGLGEERASVWWGVRHS
CL6563Contig1	Esi0056_0091	258	E. siliculosus only	other localisation	0	IPR006599	IPR013912		2 exons, 5' and 3' UTR	4.12795	1.11256	3.92812	0.0705766	0.631337	0.295156	MSSSVLKTIAARNAAQRRRVVEKKHGETIDVPEGSGLLVTGCSGCTINAPGRSSSVTVERCDAGTTVNVGSVVASLEIIHCTDVQVSVARCRTITVDVSTDVTLTCKCQPPSGQEAEQQQQQQQQQRGGGGGEVKVQPSEAADEASAIRLFTSCSEGVTVRYEGLLSKPPPGPVAAADPAVAADATAVTYRIPKDWRHENGDTPRSVTRVSGAGSGGGGGACCKTLRCDQYGIPLEEVEAAEAGVAWTWEHGRGGVPR
LQ0ACA24YJ13RM1.SCF	Esi0056_0119	671	E. siliculosus only	other localisation	0	IPR009062			9 exons	-1.66572	1.15487	-1.06647	0.779661	0.149402	0.465429	MAVLMAKCERLRQAYSDYKHLSTDNLSFVAGLRGRPVPAPGADLGRCKVRRRPKPDDVPKSEDDEKVEEDDDSSLESQGAKQACPSRSCAPRVDKLEAMTEKRVAAQTARQKAQSRLGSARERSQEAETKLEEAKAELVRMTKAIAEGDERTEALQDTLRNEGSINKAVAEELDMLLVEAMNLRREFVVDTLPPRPTTVIVPVDEGEEDNDAPSYQEDGRSLESPVIAPGQQLLARDGGGKGVGSGGGGGGPHDGSREWIHSGRLAHTGIFVRPPRPKSRGGGGGGGGGGGGSGNRNPPSSPQESSSDQQRNSGDSSSSGSRSGLLEAAAAAAADAATGRDGGEGVGVEAEAAAGDYGGGSKGRSEGEDAWSCCGKPVLSAGRGCEPREPLATPEDLLL…
LQ0ADA13YL08RM1.SCF	Esi0056_0123	66	E. siliculosus only	other localisation	0				2 exons, 3' UTR	4.70767	1.14088	0.129051	0.521368	1.11618	0.225813	MAWRRFSLREGKGRLERVVLASAESYAQAQENEGGGGSWDVTFDTAGHRNFMQRGSYSLGIGAILP
LQ0AAA14YF14FM1.SCF	Esi0057_0031	98	E. siliculosus only	other localisation	0				1 exon, 3' UTR	-0.847542	-3.34907	-0.852148	1.7862	0.382488	0.28892	MGNAGIYVFDSECSLLETSKLRAPDEGQKVSSTRMNHHYIEWVLRNEAEQMGMLAETYESACILVHVSPGSTKPCAVDQPRWNGGANHLLVDMSDKGR
CL4258Contig1	Esi0057_0109	71	E. siliculosus only	other localisation	0				1 exon, 5' and 3' UTR	1.37882	2.32036	0.840212	0.399418	0.249812	0.435013	MTCVILLSTIHNHFWQLAATNERFLQSTALATPLWDSSNTTPSARSTQTQRTDHSEGSRWAGLHLATLLGA
CL1647Contig1	Esi0058_0040	146	E. siliculosus only	other localisation	0				3 exons, 3' UTR	-1.32325	-2.1444	-1.56647	0.254279	0.7975	0.742827	MAHHLGLPPLDREVPYRRCSRQALLPPPPPLLHNNRWRSGAHSREHLHMEHQEDRRTLRAGYLGKRNRCRLSLEMRSFRWKRSERSLLPIRCDRRGRSPLPHGPCRAGPRCLSCKGRPAFQIWLRDKARCFGNLEQELMFWVAAAT
CL3159Contig1	Esi0059_0046	462	E. siliculosus only	other localisation	0	PF03133			6 exons, 3' UTR	-3.74304	-0.929979	-2.45116	0.440923	2.08179	0.558157	MAETLEDRNFPPGQPTLTFRVTGASSVARLEPLLLGPGGRNQRPTIWSRSLDSGDDGVRVDFVWETTVTKQQQRRHRDARVLNRLSGAQVLEDKANLVLLQRLMTAPTLESYAVNGRNAVARWAQQRFKEQNLPRDRPPPPPSTREAGYPHDDQFLARKRALVQGTSAATETTQESEAVGNGHAGEEDWWCVKAAGGNGGLDIWVLHKGNWKMVTEALSEHESYVIQRYVARPMLWQGRKFHFRAYALLRADMSAWLYRTAYILSASRPYSLGGNDSRDDGVRVGAGVADMHRAAFADEFVHISNLAVNKHTEGHPGQVPCDLPSEYGALWPKMLELLGSLVDAATPFMQHQANPNHFEFLGLDIIADSAGGVWLMEANRLPGLQSSKQNLEKENEVYD…
CL2525Contig1	Esi0059_0087	769	E. siliculosus only	other localisation	3	46966			4 exons, 3' UTR	2.30209	-0.43113	0.0473086	0.293137	0.739682	0.630303	MEKDIVIEQLRSQLKQLRSRIAVMEEDQAADTAPLQGLLNQLGELKGSVEEREEREQQCRDQVDLGLLRMERLKEESTAATAAAAATAAVASPPVSFTGLPGPPQPISAQADPSRGQAQAELQRLRRQLEDLQWDTRTLKRRIEERDNQVRDARAEADGLKARSRTAERELGGAQGELAVAAAEVAAERRKTSALRSELQSSRAELQSVRDRAASAAAAAERSAGEQRSRLEQEGRDRLSAAAAAEARARDRVTELSASLRAATAERDALLLSAKAAGEEAALAAAAKQDFDPAVEDGTARAREVESLRCALAARDVEVESIIDATAGFSHHTVGLGGSGALRGALAAATEARRAGRLVAELEEECSSLKAKVKEERAESHRLREALEQDTGGGKDREG…
CL3218Contig1	Esi0059_0100	66	E. siliculosus only	other localisation	0				1 exon, 5' and 3' UTR	1.93178	2.01503	2.15479	0.237533	0.276004	0.392608	MKEAIFLQHVWSFIFPDRDVGCTLVHEDNVGAIHLASNPATTPISKHIDIRHHFVRERVARGEFRV
LQ0AAB78YO13FM1.SCF	Esi0059_0120	640	E. siliculosus only	other localisation	2				2 exons	4.44975	0.812814	0.729006	0.439452	1.7972	1.04597	MKTLSQPVGAVAEVLRCFDQNIKVKMVLIPKREEFSELERVKLWWGREDYSQFRQVLIDWKRANAHRIXXXXXXXXXXXXXXXXXXXXXXXXXXXXXXXXXXXXXXXXXXXXXXXXXXXXXXXXXXXXXXXXXXXXXXXXXXXXXXXXXXXXXEVAALNAEEMERERRRQALAPPPPPQQQQQQQLEDVVQQAAAGQGNESGGADAWEVEVAVAKAMAAAVAAAGGGIAGGAVPELSAAAAAVAAAADGDGDGLEDVPEGTDEGQKEEARIGKEVVGSGGGKKRRPCARASFSVGGSGLAGGGGPDWSPNGGANGTFPLRRALTFGEVGGGHGPCSPADSGGGRLREVPLSEAQAMAESLRAWRQSFDVRNAFFGESGDGDAEEDRGRAVSLQVQSRSF…
LQ0AAB78YO13RM1.SCF	Esi0059_0121	56	E. siliculosus only	other localisation	1				1 exon, 5' and 3' UTR	2.09286	1.84124	-0.0572294	0.361218	0.39903	0.925142	MFFSSPPPPFVIMQTLFRDLITTVVIVDAIGEGWMATSLWCWGQEKDLVGGDGGAG
CL5726Contig1	Esi0059_0126	157	E. siliculosus only	other localisation	2				2 exons, 3' UTR, 1 intron in 3' UTR	-5.37247	0.130837	-2.64467	0.5466	1.09741	0.843255	MSTSGNSPEDIDEVRQRLMASSNYNEMVGRIEGNSPFLEAGDKGSAKEGEESPILPVLRQTVRVVVDVAITLVPVVLVVTYAKLPPPLLEALGSAATTIKGSPLEPVLEALPWEPAVVLKWAAQGGVAVLLSPVTDRLVVSPAIHQWVQAKLRSLSS
CL7589Contig1	Esi0059_0131	142	E. siliculosus only	signal anchor	2				2 exons, 5' and 3' UTR	1.86587	-0.244908	1.25245	0.290203	0.523943	0.227367	MLNPMLPDEVAVKQVPKQRFSGVKELFVFRHFQGIVLARRLHFVGQVWNVVWSTLVLFGILREGTALGIIVAIIVYPIFVFYMACFLRLMSELAVSVLLLPSLLAKSQGNGGRGAVAEPVGVGDADLAAYGVSGVDDAGTIV
CL4400Contig1	Esi0060_0082	304	E. siliculosus only	signal peptide	1	IPR009091			8 exons, 3' UTR	2.08993	0.688909	0.759679	0.372371	0.277005	0.35276	MTMTKLSWFSLATAGWLAGASTDAYYESVTAGQGFSCGVLEATGRVECWGEGALGDTPSLDVLEGKLLDEHHLSISGGGFHVCGLYYEGGEKLNKNVRAYCVASFDDGAEQDAGQLNIPDLPDGKYWREMSAGGQHTCGIDTDRMVHCWGSEDGLRRDLGEFAGMEHRHISAGGLATCGILMSDRTGYCVGEVPQAMLPEEYANTQFARLEAGGAFSYGLVKDTKELIKWGPTEGDPAAIVESIPVEPPTGFRSIKTFSIAAGAAHVCATGRRNRKAIASGLPTKGAWCAGTGGEEISGISDAA
LQ0AAB60YG13RM1.SCF	Esi0060_0091	55	E. siliculosus only	signal anchor	1				1 exon, 5' UTR	-1.67018	-0.281646	-0.283676	0.216345	0.115158	0.361455	MFAGAPGCNVKVVGLIAAFCVVFVFGVALMSVGQEIDVMNFSGKCGASFFLVPVE
LQ0AAB50YC17FM1.SCF	Esi0062_0092	825	E. siliculosus only	other localisation	2				1 exon, 3' UTR	4.80198	0.207486	1.24976	0.639295	1.19055	2.39968	MANMLAWETPLADENGNSSQPSWSSPRASEAEAAEAAGARGAGVVIARRTNLAGDSDFDLSDDDDAIALLKDDLRTTTERFFDRLPRQQQKAGRRASAIVPTGGDGVRRNSGSSTVSGVGGLRHQQSWNVLTELEKGVGGLIRRPAGTTSTGLRSPEGGGGGGGGGGGGGGGFTADGSATLPSPDGGGDGGRSASPNGPSSPRGGRDVLPRQRRPPRDPKTSVKDLKVRSDEAARTLEALKVLILQERLPADGGKGEVSHGHGGRNGKLWPVDAGQIAAEDSSSSSSARAGGGHGGGGGDGGGLGAKHMELLAKAMDDLQQINAELNAELRASRRRTTGGRDPHQHQHHHRHHRRSASSAASVSWRLQLHGRRTSGQRPPKRLSQASGRSSASSAAASA…
LQ0AAB50YD12FM1.SCF	Esi0062_0115	49	E. siliculosus only	other localisation	0				1 exon, 5' and 3' UTR	-3.9635	0.164299	-1.38209	2.45861	0.493482	0.180825	MWGHCNTYLDSLTSSADNSWQEEMVILVSRQSFGYLLMEGTRSCQRYPA
LQ0AAB43YI21FM1.SCF	Esi0063_0003	59	E. siliculosus only	other localisation	0				1 exon, 3' UTR	0.0169551	2.38035	1.05816	0.606555	0.184542	0.148384	MSITRIRSAPQNKSASSDENSATPVKGSELLRRTSLTNFSPVATTPKNYRLRATRSFSV
CL7156Contig1	Esi0064_0045	250	E. siliculosus only	other localisation	0				6 exon, 5' and 3' UTR, 2 introns in 5' UTR	-6.69968	-0.674302	-2.80678	0.473229	0.321142	0.544549	MFDVIGDQVVVAFPTDEDAKKATKAWNKGVPYKGKVTCMDPRPAKGPKLKRGDTNALAGFAMQVEASKKAQKKEQRRAGSSRGGGARTPGAPRAGPGRRLGLSLQGPRCCLLWPRSSRSSRCGCSQFFSLRWGHEGGYSCGAVQKMSKDLGQGCLIVLLNARLHQADFFDDEQREFFEQEFESMFHLRPVAAENEDFLYRAYPKDWTVARKPKLGPPKVLSAQKQRPTEAEILTAVEEGDKAAGVFGNIF
LQ0ADA17YE03RM1.SCF	Esi0064_0066	838	E. siliculosus only	signal peptide	4	IPR011050	IPR003368		23 exons, 3' UTR	2.48982	0.215803	0.0180667	0.341167	0.391473	0.717594	MLYCCRFESWRASEIQTMTMKITSLAALLFLGGSAAQTTTVGSCSDWPSTITTDTVLELTAAEITCDTNTHVEVLDGATVEITSALAATKLNNVKFWVREGNFLCSVPVLDWTSVETVANIHNVQVAGGAAMRIEPGSTATFAEDVTFSACELPVEDFSGGSEGAAIANLGTLLFQGTATFKDTPDGGALYTWGDLTFEKDAIFENNKSINGGDGNGSGAGLYSELDGEVLFMGAAYFIDNEVYEYPDSGGRGAGYYCNLPTVFKGPVVVRGNSGMLGALYLNGDVTFEDLVTVEDNIMEPKLYGDRSEGAIRLGSYSNVDFQAGITATGNIAKDGGALYVARESEVTISGPVTITGNEARDSGGAIWMGGESLTLPADADISDNTAVSCPGIEFTDGE…
LQ0AAA2YB15RM1.SCF	Esi0064_0071	58	E. siliculosus only	signal peptide	1				1 exon, 5' and 3' UTR	-0.693494	-1.51346	-2.1417	1.14934	1.31085	0.269372	MYPNKVFWLLLPQVVVFVISWKDLRGSWPVGGAVRWGQSRRHDRCRWMVKHPPSRVRR
CL7051Contig1	Esi0065_0076	30	E. siliculosus only	other localisation	0				2 exons, 3' UTR	1.77672	1.59518	-0.326497	0.320077	0.446851	0.647328	MTAPCARRGNTNTCGAPPPTTAVKQGAHER
LQ0AAB7YG14FM1.SCF	Esi0066_0045	52	E. siliculosus only	other localisation	0				2 exons	1.05569	1.01379	0.21621	0.14989	0.438074	0.652697	MGEDDHSSGSGGDDVSSATAEEPEDEGSHMGFGYFRPCDVSTRVPSAALTRT
LQ0AAB6YJ03FM1.SCF	Esi0067_0044	474	E. siliculosus only	other localisation	0	IPR003368			7 exons, 3' UTR	1.55028	-1.74807	-1.17958	0.22359	1.93312	0.958802	MFLVLFSSPPCLLYRQQLVTLTVGGGIELAIHVSPGSVSEGVGEGEGEDEGYRDPPVSGLRLRNVRVVVKSGAMLSVGVAGDYSLDDMGYAGPGEGTSALTLEGAAPQHSNGGALEVEEGGAAVFLVPVHFEGNSVQNGYSGGAFHADGEVTFENAAHFVGNRALGQGSRGQEAHSCGGGVSVGGTGRVEFSELASFEENSAWTGGALCNRGWAKFFRRSFFNGNRASGGASTRVGADGGAVFTEEGSTTIFTRRSTMLRNWAAGSGGSVYNAGVSTFETSAAFRGNTAAAAARVEAGSSQNVEAALPPSPPETETGGGHLFNRGYLEIMGDASFIDGVSATDGGAVYTVSGEDTILSGITSFHGNSARGNCKDVFAALAGSEVRLTTTTNSSAAAPVA…
LQ0AAA16YK12FM1.SCF	Esi0069_0013	445	E. siliculosus only	other localisation	0				2 exons, 3' UTR	-4.22063	-4.33692	-2.61197	0.400503	0.484404	1.7746	MGMFEGCAAGRTSAGGVGGVASSSPRAGGQGMLVARDNLDFPPLGTSGGGGVVVGVGPESSHVQLGQQHQPPQGGRRSWAQGQEAVLLAQRRTQELQARQWQQRQREDRLTLEPGGGGVQQLGGGVTGSVFGLGEGEVGDFSSTFNIQRQQQQQQQQQQQQHLYTLQLQQRQHQARLLRQQQQQQQQLQKHQQQHQHEQYPPQIPLEAVLGVGGDDIFEEQTGMGGGGGGGGGGMQRSALLLGSPPLSWSQQRQHQQPALDPLRTEQQLLADSPVLAGVPVLGLDQGQHLDGIGQSRDGGYGGSFTKGMTATFGGMDIMSADGMTTLGGIGSDGGVSVPPQQVLVGRMGQGEAAGSRQPQPPQPQAATLFFQQQHLQHLDNFLTDAQQQQQQQQPRLAT…
CL5651Contig1	Esi0070_0111	303	E. siliculosus only	signal peptide	7				4 exons, 5' and 3' UTR	-1.47827	-0.0703865	-0.376098	0.181641	0.0700949	0.317722	MLRLRSAAIVFTTLCALSGIATGSPALASQQQWTDTRLHGVPVLPLVQGARGGAGQDSVPKELGAGLRPRESYHISRKTFHFSTIMAFAVVYSAKLPQRDFARGMAALDACVLAGELARLRVDVVNRVLFRVFGAFMRAHELKKFSGIMYCLAGLGITSAMFPKHIALLGMLQLALGDPVAALCGHATRSVGWSRVGTGKGLLGALGCATALTLANSFVLAKARFESGAPTLRRIVLAGGMIAAWAAAVEVSVPSPQKTLPCEGFPLAFDDNAALPVLGAMGAAVVFRVLGLGSCELRPWLFG
CL5873Contig1	Esi0070_0124	80	E. siliculosus only	other localisation	0				1 exon, 5' and 3' UTR, 1 intron in 3' UTR	2.46919	1.66827	2.4921	0.433525	0.34327	0.466074	MGLNEYASIFKTTVEGTGDNVVNVWFFEHGAFQPSASHTGENYLLTFTRRTDKCDGSVSSERKVTRSYEFSRRKNDGWLS
CL3290Contig1	Esi0070_0128	150	E. siliculosus only	other localisation	1	54695	IPR000210		4 exons, 35" and 3' UTR, 2 introns in 5' UTR	3.22592	2.74574	3.45272	0.251548	0.533461	0.396057	MLLVLPAWGWEFPCHRAVLCASPWWHALLEGGFREGGGDKVDLSGLLLEGVTRTEALEVAIRHVYSNSRFSVVDLDPEVVMEVVIIAEFMVLSSLTSACQCELGRYVDEDNAPQLARFANRYRLLKLETRCQELLLSSSSSTTTTTMTTQ
CL3385Contig1	Esi0070_0128	150	E. siliculosus only	other localisation	1	54695	IPR000210		4 exons, 35" and 3' UTR, 2 introns in 5' UTR	4.20315	2.95854	5.34097	1.39862	0.856669	0.663467	MLLVLPAWGWEFPCHRAVLCASPWWHALLEGGFREGGGDKVDLSGLLLEGVTRTEALEVAIRHVYSNSRFSVVDLDPEVVMEVVIIAEFMVLSSLTSACQCELGRYVDEDNAPQLARFANRYRLLKLETRCQELLLSSSSSTTTTTMTTQ
CL3936Contig1	Esi0072_0093	75	E. siliculosus only	other localisation	1				1 exon, 5' and 3' UTR, 1 intron in 3' UTR	-1.21924	-1.24817	-2.21422	0.234892	0.157078	0.6024	MCVVHTHTTPRATETDGYPARFHLHPSATDAAMPDVQNHPKKRGLTARFLYLVLAEAWVLRYNGWPLRTFFLGSS
CL5529Contig1	Esi0072_0097	835	E. siliculosus only	other localisation	5	IPR011051			3 exons, 3' UTR	5.57981	2.35338	4.81138	0.500405	0.910601	0.148951	MMPPPAAVALPPCRTAQSRTNSSSPSSDSIHALRAAVEHKPNSEPYRREKEAMSVPHDQHQPHEQQQRQQQQQQAADVAGMVRPQAWCAANSVEPDSQDDQQQQQRHSSKQHAMVLVADDPAASAEEEMREAAAAAGSGAAIPMSPPSSPTHVAPTRLPAEAQEVVAAVVEASKPETAAAAVAAAEAVPSPPAPGLPASAGAEGGGGPVSSSGPPAAAAVPVRLGRGRKLCPSCKALTKSAVKQCRLCHHVFNPVSRMRAQHREPKENDDAPVLPRRRHRPSQRLLESRVVSAAAGPQEGAPAGGEGAVGGAASARRPLAAFNGGGDTNQRVASGAMAATAVATKKTGAVSASGEQAPKRSHKRKVPLPPGVVPPKRKKGAAAAARLAAAAAAEIAATA…
LQ0AAA6YA11FM1.SCF	Esi0072_0097	835	E. siliculosus only	other localisation	5	IPR011051			3 exons, 3' UTR	4.8253	1.96448	4.67013	0.572936	0.919007	0.243899	MMPPPAAVALPPCRTAQSRTNSSSPSSDSIHALRAAVEHKPNSEPYRREKEAMSVPHDQHQPHEQQQRQQQQQQAADVAGMVRPQAWCAANSVEPDSQDDQQQQQRHSSKQHAMVLVADDPAASAEEEMREAAAAAGSGAAIPMSPPSSPTHVAPTRLPAEAQEVVAAVVEASKPETAAAAVAAAEAVPSPPAPGLPASAGAEGGGGPVSSSGPPAAAAVPVRLGRGRKLCPSCKALTKSAVKQCRLCHHVFNPVSRMRAQHREPKENDDAPVLPRRRHRPSQRLLESRVVSAAAGPQEGAPAGGEGAVGGAASARRPLAAFNGGGDTNQRVASGAMAATAVATKKTGAVSASGEQAPKRSHKRKVPLPPGVVPPKRKKGAAAAARLAAAAAAEIAATA…
LQ0AEA7YD11RM1.SCF	Esi0072_0097	835	E. siliculosus only	other localisation	5	IPR011051			3 exons, 3' UTR	2.59359	0.89393	2.61051	0.251962	0.150251	0.239419	MMPPPAAVALPPCRTAQSRTNSSSPSSDSIHALRAAVEHKPNSEPYRREKEAMSVPHDQHQPHEQQQRQQQQQQAADVAGMVRPQAWCAANSVEPDSQDDQQQQQRHSSKQHAMVLVADDPAASAEEEMREAAAAAGSGAAIPMSPPSSPTHVAPTRLPAEAQEVVAAVVEASKPETAAAAVAAAEAVPSPPAPGLPASAGAEGGGGPVSSSGPPAAAAVPVRLGRGRKLCPSCKALTKSAVKQCRLCHHVFNPVSRMRAQHREPKENDDAPVLPRRRHRPSQRLLESRVVSAAAGPQEGAPAGGEGAVGGAASARRPLAAFNGGGDTNQRVASGAMAATAVATKKTGAVSASGEQAPKRSHKRKVPLPPGVVPPKRKKGAAAAARLAAAAAAEIAATA…
LQ0AAB97YC16FM1.SCF	Esi0073_0068	166	E. siliculosus only	other localisation	0	IPR012335	IPR000463		4 exons, 5' and 3' UTR, 1 intron in 5' UTR	-2.10879	-1.78108	-1.56139	0.324799	0.275591	0.504127	MPGCRMAAAGEAASSASGAADTAKVTLYEEFSRYADRRSVAQEVIFEITSAEHFEDVVSRAAGADEHEGYEDAQGNWRVPHKLMMVQIHAGWCRVCKGLQPKLLKLITKHPEVLCCKINKAHHEELAAKLGVRGLPMLIFYKNGKRVDHHTTANINTIEEAIRDNT
CL6670Contig1	Esi0073_0070	451	E. siliculosus only	mitochondrion	4	52540	IPR008144		7 exons, 5' UTR	-5.51062	-3.07282	-3.35317	0.812813	1.65097	0.84711	MASHPRVSGIQAQRYRRLPSAPHDHRHNYWVSRHATSRLGSSSPDASVAEGEDVVDLEARPFPKVGDVVRYKGKWENEVSFGEIRQLRKVEESGGWRAYVLGLDSIGNDQYARKKNQKSKAEDVTTLRPVRAFYVRSVDGFKVMHNSDSGEPRYISDAYELEGFELPKIEVDPVKFAAELESYEDLKRRLVVDAALFGAVGAFAAFQIFGADQGLLFALGALASVAYVILLEKTADDVASGKQDVATKLKGDARFAVPVVLVLALAAKNYLANPDGAVLFKLIPKQDFAAVMIGFIAPARLPLLYREVKSSLKGDDVLDMLPGSIGQGRAILRSMGESSGATADGAVEMAGPQATRVIVVSGPECLGKTTLVNKILAEDSRLAQPAWCTTRPLRASEVD…
CL2538Contig1	Esi0074_0011	45	E. siliculosus only	other localisation	0				2 exons, 5' and 3' UTR	1.0872	-0.165719	0.639799	0.182513	0.253833	0.155338	MLKNFEKEFKEKNGREVSCPEDIAPVEGEYQKYKMIKKRLAQLTK
CL280Contig4	Esi0076_0044	56	E. siliculosus only	other localisation	0				1 exon, 5' and 3' UTR	0.153494	1.2961	-0.295835	0.345485	0.228344	0.458929	MASASAHKDEMGIAACTDGLEARASAPLYLTHQCRPNSTTTHALRRVRRSKKVSVP
CL7300Contig1	Esi0077_0022	226	E. siliculosus only	other localisation	1				3 exons, 5' and 3' UTR	-1.34769	-3.16212	-2.30494	3.15223	0.315772	1.00934	MDNVSVHFFESSMNIRCIPLTAFDFPSHAEIWVLRARVVSCLVEAGQDVIMSDADALWLDDPFKDFNLPRVIDSSVVASRGKFPKPLGLEWGATMCMGFVLFRATGRGVVGEFLEVMDALVHKNKDDQVSVNLAAETLGIVWDQESDMRYVESDSFGFGTIDTLVDENNQPFSVTLLPHNAYTRVCDETPISNKTVVAHCWAPKTADSKTGWMVQSKLWFSDNETR
CL58Contig1	Esi0077_0074	51	E. siliculosus only	other localisation	0				1 exon, 5' and 3' UTR	2.55585	1.23339	2.3658	0.349685	0.376028	0.185269	MFVSHKGQRIIHVKRLRGGRHDSKSADAMLNDCFGERTNNRAWSCVSGVTL
LQ0AAB43YL03FM1.SCF	Esi0078_0050	174	E. siliculosus only	siganl anchor	1				7 exons 5' and 3' UTR, 1 intron in 5' UTR	-3.09099	-1.28928	-2.16259	0.317687	1.9361	1.25959	MWKPEEVVPRHKRRAVLLWTTLIVGIISYSTYTLYRGLKRREDPGTTFKLSNNIYQYPDLWVCLYVNYGCDEMELQEECVNSSNATEGGETLAVFYPGGEYEQVIPGEQILSKDKGFFCVEYETSTITTFLGQEPETGEYLDHILLDRMDIHHLQGRRNREPLLRNPTSVYLHY
CL1045Contig1	Esi0079_0022	255	E. siliculosus only	chloroplast	2				6 exons, 5' and 3' UTR	-7.15136	-1.43165	-3.21488	0.85233	0.344905	0.428713	MRCFSSASLLVVSATCCHGFVSPGAVVAKQASSRGRVQAVTMAAESSGPTSRGQAIAAAAAGLLATVGGVSAAGAGTTVPESLPACPTEGNCVSSTSFKLVMQGRYMAPWSYTGDSKDASVAFAKLLKAVENDPQLKLVDQDADALYISAMAKSAVPPDGFDKVEFLFKPSDGLVSFRSKSLKNVYAGPVIVGDGNSNRNRLEALRKKLGWPEEGIDNYMRDQGIDSGTSRAKGYLSEFGWRKVESQSYGEEDEY
LQ0AAB104YK10FM1.SCF	Esi0079_0071	334	E. siliculosus only	mitochondrion	2	IPR009020			6 exons, 3' UTR	2.50644	0.815299	1.96678	0.227785	0.449557	0.220674	MASMVLRVANVGQGLAFLRFTSKLGELVPFRRWLRVEPPFALLTPGERAEFRVSVFIDRLTARDLCAGFEVLEELLVLRLEGGAEHYVPVLGRYASRAFGTPLEQLSARHGSQAARLGIPVELWRLVDSVIGSGALQTAEGAAELFPPVETAMPPDVPLDDQTAAVLRCLDAGSEFPPSIERPALVSAMLAFLSSLPEPVVPVAAVKAVESELAAHRVSGASGQGAGGTAGGAWGETFLRALSPSQHNTFLYVAGFLREVARAGRSAGLRSGPLASFACDSLCFPDPPWLGSVGSSSSSTIVGASDRSSDTSVTWQEHREVFRVLLSSFVSATR
CL5404Contig1	Esi0080_0027	155	E. siliculosus only	other localisation	3	53756	PTHR12526	IPR001296	1 exon, 5' and 3' UTR	3.18682	2.97466	1.00544	0.440775	0.678203	1.12374	MSTTPGGVGCRRAKFEWDPLLCVSIDLWRYRKGKDVAAPVAQRRCDCCVGAVCARSACCSMSCLYSFCSSLLPRCGSTSGVRVLFLSASFFFVAPLTRVCVASRRATETQGGGASRRFFWFMVAGAVRRARSSRLVWSWVLAVLPFISGAVSDEV
LQ0ADA18YM14RM1.SCF	Esi0080_0093	40	E. siliculosus only	other localisation	0	52821			2 exons, 3' UTR	-1.55945	-0.386787	-1.3119	0.312465	0.313689	0.404978	MGSRSAQAAGWLENAGYSGVVNMEGGFSAWARDDSLPVEV
CL6575Contig1	Esi0081_0091	94	E. siliculosus only	other localisation	1	IPR006811			2 exons, 3' UTR	4.70846	0.649763	2.90313	0.552633	1.37105	1.90637	MVSSGVPFGCRCTAPCLLFHTDLQQRDPDTFKPLHVVSMTIRDSADDSAAAAGDVLDLCKMLEDCDDLDSDAAKLLNDFRIRSKRTVLHQVCHI
LQ0AAB2YA06FM1.SCF	Esi0081_0091	94	E. siliculosus only	other localisation	1	IPR006811			2 exons, 3' UTR	3.74955	-0.624617	0.672902	0.580851	0.442494	0.434326	MVSSGVPFGCRCTAPCLLFHTDLQQRDPDTFKPLHVVSMTIRDSADDSAAAAGDVLDLCKMLEDCDDLDSDAAKLLNDFRIRSKRTVLHQVCHI
CL7315Contig1	Esi0081_0104	177	E. siliculosus only	other localisation	0				4 exons, 5' and 3' UTR	-0.92169	-2.3763	-3.61837	0.626802	1.11106	0.191409	MSLKEHRTKSTVFWPAPPSNHQLARALSFCETPETQHYLNLLKRELPLLPIKPSRTAINNARACTGGDLLSTESNERKSQQRHHSRCSNCNSPCRRNGKQRRRGRKVELPKGVHGVVLREKPCPPGVRENNEDVASYWAAETSFREVTVWGHDQPRQESTVDRSLAWLEVSKSIHDP
LQ0AAB33YJ24FM1.SCF	Esi0082_0016	338	E. siliculosus only	other localisation	2	63829			6 exons, 5' and 3' UTR	-4.51005	0.471388	-1.55197	0.828838	0.052774	1.53076	MAKRLKREAKEAAGRAKAEEKQRLADERAAAKAVAAAKAARAKGLAKGQTPITLTYSFSVEHELITTNYGVLNDLVLVDDDELYVTQFMAMRHPLHGPTQPDGVLEHLRLYGSMLLLMLQISPAPIIRCTGIRGADIDCERLAKGRGAMYNGIALNPNGERLLVSDTAAMQMLIFNRSVETGALRLRQRLDLPGSPDNLEIDLYRAAEGVEAYTVGLIRATDFAKYSAAMGGATDPTDGDDIKMAGGFASIVFDQESGKYESSLEMWHDGSLLSISSAASTASGARVMGSAVEEGYLLCRPPPCPLGSQEAATDGTTCPWGPPPPPAVEEEEEAEDPE
CL6354Contig1	Esi0083_0032	853	E. siliculosus only	other localisation	3	PF04097			22 exons, 3' UTR	-0.287756	-1.46661	0.217421	0.265452	0.211711	0.116172	MGAEAAARSRREAVSLGVTAEVAEQKQELKGGSMLARNRFDPESLTRAVNAVHLRGGYQPLQPLGETDIEGYLAHHHDMIVLTAVHGTRAAAEECSLVRQREWEVDSWRETKKALMGEAMNGGVSSCGGVGPSSFSGVSMLRGPSGVGGAGEQGRVHPETPRPEGSLAVVAVPPAGGVIPPVSAVPPTTTDTASRLSALEVGHLAVIRALNDTDGKFPLATRLAASASTVVTPGVKNGPEHAYFNALKMLETMLEGEGWEGAGASTSRSRLDGTLDFLQKQFKQVIDDQVKRAREAGTVDASTVRDTDTGLPFKVRAFMRLDRKSKFVVGGGAMLSQLPVWPQIFLCLRCGGRADASAIARAAAESPENSRCTPQELELLTKVSELLAQGKTENAFGGA…
CL4914Contig1	Esi0083_0049	473	E. siliculosus only	other localisation	1	PF00644	56399		6 exons, 3' UTR	-0.850125	1.02613	2.25853	1.12775	0.290402	0.353677	MKAWHKITHWRWHSSKWSKSKTPPPEGSAQAEEETTPPAQAAAAHMILLAGELEGILPRVGQVQPNGNGEEEEETNADPSRQSYGPKESPGEDPVDERLLRKQEELVRTGNEEEMIQELHASLLKLHDNLRRSEEMAAARLKAVEDEKAALEVALREERAKTAMQEKTMHFLRQTNIQAQSVEIELRNQMETLQKEKKSQGLSHTKEQKIRSGLARLVENDLQKQVATLAQLRREQVDEIRSLSIQLQGLEVNRVPLIGGLITVLSSQGASATFTSLGNAHPDCSRLRADFYPGWEAPGGVAIVRMFRITVPAGVRQKHLNYARRLGNVVQRFHGTSCRSACNFILDPKNAAPCGQQGCNLCNICLQGFKLGKTSTRFGPGVYFSKAATKASSYALGTE…
CL1509Contig1	Esi0085_0005	178	E. siliculosus only	signal anchor	3				4 exons, 3' UTR, 1 intron in 3' UTR	5.33899	0.442592	-0.37725	0.271445	0.552391	0.574446	MQQSQALLANPSSIPPVIQVVPRRRECGSPGASQATRRATAAILVLHIVLLVVNSFSWSQLASCLMGIVMGSAVLCMFNKNLYVIAAGVFAAGSALDLWQVVRWVGLALMLHRNNQMRDDDDEVPTVLLGVVIVPAVLGAASFAFGCVSAFDDAFSGLPRHERDNGSRDALPTYVDGL
CL1188Contig1	Esi0086_0026	91	E. siliculosus only	other localisation	2				2 exons, 5' and 3' UTR	-0.811077	-2.25056	-0.565503	0.519594	0.335211	0.216069	MELVPAGTPDPTPFIYDSTLYTMAGLMGVAAVAHSTIRPMNPKYYEKADTSPIEVESVLRSPVAAAVGGGAAFFPSMASHMVPASVLPLRK
CL6390Contig1	Esi0086_0046	235	E. siliculosus only	other localisation	2				1 exon, 3' UTR	1.38972	-2.32668	0.434232	0.66143	0.263815	1.09149	MVPGAGVSRHGKRKAEHERNASASKKAMEAYYGHAGHAGVAAGGGRSSGGDNSGEEATDDESEFSSVDGRTSPSQQPGAWGVAPPPQPGMGVHFSPEAHDFAAAAAAAGFNNVPAAHALQQQMVGGASSLGSARASNSNGWSAYGGVGGGGGGGGGGGHSSRQQQQQQAQLEQQYRQQQLLMYQQQQQQQQVDARKASRGGGRPEGDEWGWFVDAGEQEQQQAHPGQWGVRRSAH
CL4554Contig1	Esi0086_0059	58	E. siliculosus only	signal peptide	1				1 exon, 5' and 3' UTR	5.43961	1.4306	4.26276	0.761861	1.86994	0.787973	MMPFLALTWWAGAQRLLWLLFGPAVCRPTRPCTWALSHTPGFVRVHAFSCGGETTATR
CL7237Contig1	Esi0086_0059	58	E. siliculosus only	signal peptide	1				1 exon, 5' and 3' UTR	5.64252	-0.240091	4.48119	0.213182	1.98319	0.750183	MMPFLALTWWAGAQRLLWLLFGPAVCRPTRPCTWALSHTPGFVRVHAFSCGGETTATR
LQ0AAA21YN11FM1.SCF	Esi0087_0004	77	E. siliculosus only	other localisation	1				1 exon, 3' UTR	2.82083	5.51792	-0.0287382	1.50433	0.394391	1.14471	MGWLTFSHKLCCALNPPEKRDREEHIIPLRDKLFLGECRLHVGMAGLGCLLLSSTASCSAIETKTYDVNAAVGARLM
LQ0AAB36YK11FM1.SCF	Esi0087_0051	559	E. siliculosus only	other localisation	2	IPR008973			12 exons, 3' UTR	2.84019	0.80977	-0.331558	0.388644	0.984625	0.568541	MSKSERIAISCYDRVAIGGELLLFDHPGARPPGVPTEGGDGAEAAAVPPTAEFAVEELQAALRSKGKKAQEMLDERMKQFEEEKVKWEQQREAAAKAGKTFDDEEPTMDEERERAWQSVDKEILDVLPKIKEAKNIVGLMDRDTLTFDVALQRTEDEVGVPKVKVRVENSAIAGEANSILLDPIDFLRGFSVLKDELVHLRNAKENGRTYVVDTHHDPIQLLFDNTFHLGTGVMFPEFMLYNLEMESDERVVDIKNVSAPYNNVGAFEMVWTPLPGPEEEDAGKDMMDVETEEDLVGKPWTYRVDLKGATGLPLMVSHAFVQYELGGNLFTTETVEQDTHNPLLEYSFLHHVERVTPELIASLKKPMQFRLWVSPYVINPKNLVSTDNSRVLNPNACAE…
CL3030Contig1	Esi0088_0006	86	E. siliculosus only	signal peptide	1				1 exon, 5' and 3' UTR, 2 introns in 3' UTR	-2.32511	2.24489	2.3196	0.934143	0.738295	0.290849	MVRVLLLLPRPLLEAFRRKPLHFAVVAGTETGWTNPPPTDRPRQPVPVVPIRLSMLPVLLLLPLPLVEAFRRKALHFSVAAGTGTR
CL7600Contig1	Esi0088_0006	86	E. siliculosus only	signal peptide	1				1 exon, 5' and 3' UTR, 2 introns in 3' UTR	-1.40031	1.5205	2.76502	0.335251	1.1723	0.313935	MVRVLLLLPRPLLEAFRRKPLHFAVVAGTETGWTNPPPTDRPRQPVPVVPIRLSMLPVLLLLPLPLVEAFRRKALHFSVAAGTGTR
LQ0AAB23YA06FM1.SCF	Esi0089_0044	296	E. siliculosus only	other localisation	2				2 exons, 3' UTR	5.6709	6.15746	2.82479	0.597769	0.609897	2.03477	MLTDGTGKAPEHVLSKAVLKNKDQDLSLSLTLVRDALGRPKYFLCSLLPNTPAASPPLSPLPGPLSGGGLLPGPGGAASVGGSSDCASDGAASSGRASGGGGGGVMDASSTSECGGGGASLPPPPPPPPPPPPPPPPAAAARGPVGLIPDASAAATSSAEGGTTTSDAAAAAAAAAAAAAAAAATAAASAGDAKSSVSTTGSDSGVNPTLTPAAAEPGGISVSSADDDDADVASMSTAAAADAADAESINGCSSGSDGDVGSTMMSSREVVELVEVFESSRGGDSRGKDGMAAKRS
LQ0AAB10YA08FM1.SCF	Esi0090_0001	32	E. siliculosus only	other localisation	0				2 exons, 3' UTR	5.03318	-0.827699	-0.139326	0.40311	0.960032	1.84079	MKEDTTTHTRTKRPKVGGEGRSRLARTSTTTR
CL1235Contig1	Esi0091_0004	253	E. siliculosus only	other localisation	1				4 exons, 5' and 3' UTR, 1 intron in 5' UTR	-0.00521713	-1.59017	-0.305531	0.444524	0.223686	0.146389	MGLGEDEFLVPSGPMMGGSSSRESLRSHHQHQHQHQQPPGPWKLVRPLLVALGVFGVSTGAARYLFPRRKLQPQREQLERLVAVRTGESPVTSECATAAKVVMEGADLTRYFSLELGAAAVYGVEEHEALYNGYKFWFESAENKAMFEESPKSYIPQWGGFCSWGISREDWWNADELGPPADPNQWLITDDGGLHFFRSELPMSKFLGDVPGNIVAGNQIWHSWWGDVEPAADGAGSPLDTDCFCSTETCEDA
CL7393Contig1	Esi0091_0023	383	E. siliculosus only	other localisation	1	IPR001005	IPR009057		5 exons, 5' and 3' UTR	-5.34467	-1.50962	-1.0126	0.43679	2.42716	0.907509	MFKNRSTAVAAALLLAHHRHGNMPPLAAGFVAPTPIAAQPQRRLPPWCEPVSFPPAWDSSRPVPASSKPPASNCNYRSCAVRGVRPTSATTSHAGASPSGSSTPKTGANGPGAGSATSSSPSAVVTQAVEGSEHPAGGFANGALIPLSTEGGSSSGAEGATAVRVGKWGEAAEGNLAGEFEWEGGAEAAWTEFEDWLLQDTYSRYAIGSGKHVLWRRMVREVPELMERTPQEARERWLRLTGRLSAGGAEGGSRRERGEVMAGSPALDNFYIQPPVLEQWEEIVEGEGMGSFRGNVFGQRGLADGTAMTTAPIDISGRKIQDQYVATQCGVVYELGERRETDLVSQASSKMLKIAPATVLALAGAFYALTALSHHIQVEVFVI
CL6656Contig1	Esi0093_0059	410	E. siliculosus only	other localisation	1				5 exons, 3' UTR	-4.59279	1.67388	-1.22484	0.640078	0.440191	0.215909	MHLGQGFAEIVHHKQTVKAYSGNLDPAHDDSLAARRQHLPEVNPAANEGDLFRYFSQSQTAFEELVFEKACEKSAARRHLSADEPCEEGRCDANPHGNVPQVEEVSDAMVIALKAGLLDFEHLQEAVDRNLAFQKATNGDTGGALERFGHCVEVFERYPGVCRCMILWCRMSHSLLGALAAIDDSRARELYNRLRDVYNPSRPASFLPAPPLEEWRGTSAFCDDFQCRLFDGIIASQAFSVFSSPPDCTSNYAGLQHEEDDVPVVDEERDGGIAWAGVIPKEVTGSVMVTPCSNGVKPVASPSSWALNQEPAPQTNPPAGSSPSTSHLHRELGRGGASGTAIFNSAVEGCGGGALSGLVGQVPGMSLAWQELRDADGFPDGTGDDTIAEADWLDVSLVM…
LQ0AAB104YF18FM1.SCF	Esi0094_0015	603	E. siliculosus only	other localisation	2	IPR001138			4 exons, 3' UTR	1.84286	-4.7619	-3.0052	0.308603	1.35825	1.3315	MPSLVKKRSHVGDAPGDQQSTLKMRRSCDACALAKRRCDGELRCSLCCKKSIRCVYSTRQKSGPKGHKTPGESVAATVTTSISSTTTADKPIKRCKTSKKPSKKQASAAAAPSTTTTGWQQHQRQQSSLLKTVPPGKSEPITPAALALSATAAVAPASPSLSKRQQPAAPGRRYASQQVARKEPRLRHQRKDEAAEETAGAKFAPLPRMVPRRGSSVSAPGSESSVDGSSSSLSWDDVQDVFVSSLEDDVLWSCDDFSDDDRAEGWAAAGVASDDHSPGGFDWLPLNAENVTPSSDLPKALEAILMAGDQESVLTTDQTATTAAPRPAGQFAGQPPPSMALAPQEPMMSQMLPSRASSPSVVFAQRSPGAGGSYGGGGESSGGWPPSTKISDDVEPVVV…
LQ0AFA6YA20RM1.SCF	Esi0094_0081	172	E. siliculosus only	other localisation	0				2 exons	-2.07039	4.71101	-0.792959	2.04847	0.551701	2.04421	MRSDEPAALGVENSNLFLNVAFPSRKGQAPQRKQPCRRRRIPSPQSPRRAALLAPRPPLVRLPNQAVVALHSAVLGKDFLLNSSGGKPGVGVFTTEAIGAQEVAAELEGEAIDFTVLCLGRVDTLALELGHYLLGRDSLLANAPCPCDCQRSFFRTSFARYGWGTRVGCTVV
CL4055Contig1	Esi0095_0051	179	E. siliculosus only	other localisation	1				4 exons, 5' and 3' UTR, 1 intron in 5' UTR	-2.44621	0.031551	-0.734326	0.387391	1.55804	0.768017	MTVRDPDAWWNSMVASIHTKNPVLGGWGIFFLEVLKSDVRLYKHMLRYMKTHTMEEDEAKADYVRHNKEVLAHVGADNGRELLEFSVEQGWGPLCKFLDVSVPDVPFPKVNSREELKIRLNRFNRHGWLLMAATVTVAGASVAAASFFGGKRAGGALAATEALVLTSRFRKALALRRTD
CL3413Contig1	Esi0095_0089	560	E. siliculosus only	other localisation	2	IPR000104			3 exons, 5' and 3' UTR	5.21836	-0.0654909	5.27005	1.74794	0.620487	0.62187	MKGFEGFFSPLLTLPTDTNTARRPWERTDKNLGDSGDPNGPSESPASSSHPSQLHPELAPVSTSSFDSIPSPVKENNPENNRELRRRLTAAATAAASQRLPRREPKHDEYDHDHRETRRSRPARTCLCRLCTGLAILALVGIVLVTRLVIHFKSGSIPEQIDDVVRPTCVVETGAVDIASSEPDPKHLEAPSSIAGVQTGLEDEDEGEGESAPALPKDTPPIWKTTSVHVPKATHDPVPYKDNPGEEEGAAAAAAAAAAAAAAAATETAEAAAAAAAAATAAAADDDDSCWIFMHMDKSGASGARRVATEQWRKDELVFDTVQWRRGDGFAADVMASRWKLLHGGCVESLRNHKGRSCKWITIFRHPIARLLSAYDHCLGAPKDPVCPPTESTGLAAFA…
LQ0AAB76YB14FM1.SCF	Esi0096_0014	167	E. siliculosus only	chloroplast	2				4 exons, 5' and 3' UTR	1.42305	2.93207	1.54113	0.447323	0.39786	0.709186	MMVQGFSSVFASAVCLLTASTSAFVVPSARVHALAPRAAAATTATSASALRTSARHSRRSALFMSEEAEEAVEEVAPAAPVAEQDPAQDATTSVKSFFAPNENVRLGSSRDQDGKSNVWAVEPKMRVEGTDVETPESNSLLVVGGIVGALVVAMSATIALLPSPDSM
CL1339Contig1	Esi0096_0031	127	E. siliculosus only	other localisation	2				4 exons, 5' and 3' UTR, 1 intron in 5' UTR	2.15841	-0.626941	0.0683654	0.304015	0.385105	1.03161	MKGADGYMPHHQQIHDVQQDFRNPAICRGVNPLNQRLGSKVAVPMAGSLQAASTIAAGSSANDAGLGSGEACGSEDAECDGDDMDEMTFSVLCWICTFFFWCMVARTIIDAAVYVAGSATALFVVKG
CL2799Contig1	Esi0096_0067	106	E. siliculosus only	other localisation	0				3 exons, 5' and 3' UTR, 1 intron in 5' UTR	-1.7275	3.60576	-0.833999	2.74446	0.335156	0.802395	MVLVENNRLLEFSSRFKCTWYGLPHPVQFMVLILARKGFPRSPLPPRRRRLDGRERSKHAMASRICRRHIQCQNKWKRMIGVHHHVEGEGSPRHCQWDGLERARRR
CL1900Contig1	Esi0096_0068	548	E. siliculosus only	other localisation	5				7 exons, 3' UTR	4.43779	-0.332405	3.39499	0.29203	0.743516	0.502592	MRRSQNGVEVLQEGSGGSADVETYVQTTHEFNGNGGGFVAPLGGGTSVDSAKGLEGGEAFFATGGADARMEHQQHQHPPDWMRAFERFRPRTSGRKLLGMAKASAGSGGVVRRFMTKGLEKLHAHVADTATASVLIGCASLRFGSKAVLLLTLVAGGVRSAAAANTTTTRTVGTQTNTTSSIEGINSGGWTCRPGDADCLSDDTDEKTWTWFEVITDVLALTTVLRFLWISAVWLGGTTTTCVMWARTRRSRSTRASVSPLIPTADAVVVAVAVAATAAPVIAAPPTAAAASTASTAPVAAAPATAATPNTAGTAAPAGEEAAASASATSSSAEPASVPVLRRARSYVERIVSNLTETAMVVGEAASNVGDAALELVVVVRPAEAEAAAEAEAEAEAEA…
LQ0AAB96YM21RM1.SCF	Esi0097_0017	100	E. siliculosus only	other localisation	1				1 exon, 3' UTR	1.79907	-3.97223	-0.839707	0.265526	1.90063	0.152707	MPLFFTPQRAGDCCECDCVIPADASEDQLAYSCVQFSCDDTSSACYVVPAPTPTPVAASDDGDTVETAENAATTATAAAISTSAAALAVALISGAVAFGW
CL5572Contig1	Esi0098_0003	457	E. siliculosus only	other localisation	2				12 exons	1.54271	-5.6815	-1.53971	0.292306	0.840097	0.789365	MEFVIPLYIAPMFDNGTTVTIDPQWTALAETAATGATVFGILNPASGPGEVTDASYPDVIDYVKGAGAKMLCYVATTYGNKTTGSVEEEITAYQSEARVVFNTGQAADEQYFSFSPPAEVLGYENYFKAVRQLGVPETSDISTPPQNMLLLHSATELAEKPELIQPFVDKAYCKGWGTVYVTDDLFDEGNPWDNPPTFWTAFIEASRNIPTVESCGDGGLKIIAPLLGNDDADTEAIMATADPGDYGDRIMVAMNVEITETGESTDRAAAVRDAGAKVLCYIEADKYGNDLATLEEVVETYTFFPLNEICGGFFFGAFNILLAIEDMPGMQSLYLKTQKTFLQPTVVFAPEVQDYSDGFESSYSFSYDFVEDDWYSTNNWDSTTNFELPWEDVMTETDL…
CL4485Contig1	Esi0098_0082	206	E. siliculosus only	other localisation	0				7 exons, 3' UTR	-6.75384	-4.82881	-3.28885	1.98349	2.12325	0.332514	MTRPEIQKKLSQIPVFFLRDESGAVHVENGEGLFFMSPGDAKEKLQDLKGAEGTKVAATTLDDVWYPLIKKKGLNKNSVAAGASGLSDLSARYRIIPRSNQVAQALETQGWNAVADAGGVPVWAAETLAFRGTGNKMKLPLFTNVDDLMTSWDRLETEGGSEAKSPTIQVSSIGAIIDMMQRGGGDQRNLEFFADMDAIEQAEKLL
LQ0AAB67YK13FM1.SCF	Esi0099_0021	736	E. siliculosus only	other localisation	5	52540	IPR000048	IPR004051	11 exons, 3' UTR	4.12074	-0.260111	0.566261	0.678409	0.469203	1.11088	MTFAVKSERNGWVFNPPAPSNWGLPDDGSQYAYGLSFPRLNKDRYGTVRWAKRLFKTPDQHRNVSSVNHQRLLSGARWRGGGGGVSRRAARKGSGVTVRREESHTRVETEAVMKRIVRVQALYRMHQGKTSFKNKKEAAAVISRAWRNGQATSGDRLMLYTVVMLVKDIQRVYRGHLARGTAAARLKSVCKLQAWQRMLLLRRRFRKMKTAAQLVQAITRGRICRVAFMVVRELVILAQAAVRGWIERRVAAKQRKARVDELRAQASGFMCRFVYVPAAAAAAAIMRRVHAPASKRSVSCLQPSQANSRVFVIFVSLLGTQVFELWVRASTPLVYRSKFWVLFQGGAFLDLAVHEDEALRLWRDLGLVEHEKEHLARVHFNQTFTYVSEWLRTTRPTSA…
LQ0AAB53YM09RM1.SCF	Esi0099_0038	352	E. siliculosus only	other localisation	1	PF00903	54593		1 exon, 5' and 3' UTR, 2 introns in 5' UTR	-6.26919	-1.27538	-3.09226	1.10166	0.714692	0.453174	MSESQASDRSSSRRGEGGAEPTGRGDFLRNSAAFLAGGSAAIAAATTAGAGFPSAAEAIGDLYEFKDQARFAQHATVQVPDMAAALKFYVDGVGMKVIRTRAGPLFNTTVVGFGPEALEVPPSFVFGVSSTNGYGGHFTLELNSQKEEAGAAEDGEEDVDFFYDPGNGVQFLQIAVDSYRISQVVKAGGIIESGYGYLQVLAPGGLRLKLLSGSRRDPPMFLAVKVKDMKRSVQWYTDVAGMTKFPFPRAREAGSPFEPEQPAGSVFMAYEGEAFGVVLIPAAKGDQINPGSVVSVAVLAEDVEKIAESLGGKVSVDSARGGGKSVAVADPDGYGVKFVEYSDWRGQLPRLV
LQ0AAB1YD09RM1.SCF	Esi0100_0047	65	E. siliculosus only	signal anchor	1				1 exon, 5' and 3' UTR	2.36029	0.132887	1.33	0.395838	0.235225	0.386522	MEYSCWLVCDRSRSARPRSGCIMLRFRNFLLSVVGRFCGGHLSCLRPTFLVVLVFLSYCLVLPLC
CL6761Contig1	Esi0101_0027	23	E. siliculosus only	other localisation	1				2 exons, 5" and 3' UTR	0.68543	1.23268	-1.82415	1.07566	0.142552	0.546613	MLQSMTWGVGMALAFTAVGMMFR
CL3398Contig1	Esi0101_0047	460	E. siliculosus only	other localisation	1	IPR009668			9 exons, 5" and 3' UTR	-0.11004	-1.48956	0.525202	0.0483232	0.186658	0.259034	MAPGDDPDAERSSKKSKKRRREEGLAEGGVVGAGAGGGKRAPSSREVVLRRAAEGSAGPILVSFANQTVPGDMSAVEFRMHEADDEEREGQKIVMGDGGRMDYWGLNFGPGAESNDLCRFLVGVEDGATGELILHEAGHAYSLRQSVGDKDDNIEDFAMEGLEYKQRKDALVNQFGSKKKKAAIRSRDANVIQAGSVVGGSAMSRVLGRALKEEEGGGAGGVDGDPTATDGALAAVEEARRRFLPKMRTEASTPEGVYSAGDIAGVQELESMEREIDRAAEQIEGGMHQWAKDFAERPRESCPHFVGKRLTLLLDLGERNQKRRMLELLYLRHMCVFHHASALLKGTPAQLSAKLDIPEIVLRRLLEKFSVCEKKGAGGTANYVRTKTLKNQLVVHALC…
LQ0AAB31YJ22FM1.SCF	Esi0103_0013	964	E. siliculosus only	other localisation	4	IPR003409	IPR001705	82185	2 exons, 3' UTR	1.34671	0.257102	1.17288	0.287326	0.763984	0.196847	MSIQLDGNVTYPSQLRNGAPTSAPSAAPQATTDEAAAKAAADGAAASSRIGWDGFWHYSKQKSKAGGPELSAFKYSFVGPLESEKPLGAEPAAGAPATTAAAEAPAPAPSAGSGGGASGISTTQGAEKTGGGVTTASSSSSSSLPAAVSPTPPAESSNAAAAGGEAGTSEPQTSSPLLLYGPEGDGRLPSGNWAGYFIVNYGRGVEVKVEETFVLDFGSKSPRSPTPPPAAAAPVVAAATAGANATSAAGTAGATPVGANSQQLSAQAVEAAAGAPDVASRAAEVGGNQAAPVGAAAAVPPAPPQVDPASTAQPPPTAVPSAAAAATAAATTTADAAAVVPPVIQGSAPPPVQVQIAPVVRVSGRGQNKYGEFTLTGGHERATGRLDLTRFYYEKPKER…
CL5249Contig1	Esi0103_0048	225	E. siliculosus only	signal peptide	6	PF01694			7 exons, 5' and 3' UTR, 1 intron in 5' UTR	0.613468	1.6038	0.246141	0.218931	0.135345	0.343784	MGSSYRNLLVRQEWWRVVTAAVAHGGLLHLAFSISSLWSCRRIETELGSWGYLLASAHFVVLAEVFEKMFMHVLLRTGRVVDEVSCGYSGVVFAWIVVLSLRPDAPARVIGGFVFSGFASVVLNLVVVRILIRQSSFVGHLAGVWAGLLFSTGALDFAREDRYWSLGLAAWALAVLLGSLKATTTIPIPLIDYVDLSGRDDLGVGVAPLDWSNREWLEDWAAANA
CL2513Contig1	Esi0104_0059	414	E. siliculosus only	other localisation	0	PF01485	IPR002867	IPR000433	8 exons, 3' UTR	3.23668	3.58402	3.96862	0.619783	0.27152	0.189188	MLAIVRFADAAPAASQSPCPVCFEDIQAGEVFTVDCKEQHTFCVDCLHHHCRVQLLDSLIPACPLSTMKCGHELGQEEVERVFLLKSYSSASAGGKDGGDTTGVSEEDRRALDTCRNLLTRRGLESTGAIPCVSPECGNWMVPEGGGQRVKCASCLVEFCRRCKRSPYHYAAECDEVVRLSREWSHWLSEGKAAFLGAMAAQDDQHRALLDRHNRKKEEHDRAVKEAQRVRLEYERMEEWKEQRCRCCPHCGRTIEKLSGCDMMVCGVDAHGGNVQNGCGKRFTWSRARPYRGDRGECKATPFTEQEPAAAARSRHFIADGIALRCDRCHRDVVGPLFRCVHCPSFACCLECQDVASNDPRHVHHIFRVVNGDKEQNASSPESGAPAAAAAASRVAAPP…
LQ0AAB14YJ10FM1.SCF	Esi0105_0030	62	E. siliculosus only	signal anchor	1				1 exon, 5' and 3' UTR	2.74116	0.675259	2.64356	0.0940122	0.623296	0.185995	MDRTRRPIRDVNLKRRYGAMRPGELMHEQLCLLCAAVLLLLVGTARKKMSTKRKSSRCALRS
CL6189Contig1	Esi0105_0044	221	E. siliculosus only	other localisation	0	IPR003034	68906		3 exons, 3' UTR	-7.48682	-3.15391	-2.69765	0.706021	0.997397	1.59176	MVTEFLRRRPGAGGAAAGADSGSDTAKPFFSDFDLLPPVAGERSRAEEGQDLGGSGGRRQERQPGPAKQNAGSLGNQERSENRSAEGRPPAKERLPAVAQAPAPAPAAAADFAPKDDFGDLDAILGEPLAGDGAAPFGGAVGSPAAPAAPGSSSSGVEEDGDGGDGASGGVGGGDAGSGGDAAKAEVESMKVPELKARCKALGLKVGGRKAELQARILEAL
LQ0AAB29YI07FM1.SCF	Esi0105_0061	200	E. siliculosus only	signal peptide	5	PS50286			6 exons, 3' UTR	-4.82214	-3.33429	-4.53391	0.587822	0.533062	1.14269	MGLTSGLYIVLALCGYLYAYEGTKDDILLNFAPSDRVMIVGRLGMGLTMLVAITILVLPCRDIVFLVMDSVAEKLQEWCAGGKEYLPVDGTGEVLTTPGGTMVTKTRAFFLAVRHVGTTVAIMGFSLFCALSVPGVGVVWSICGSSVGFMICYLLPGVFYLKIRWHKQFNIRKAGAFLVVVVSSLAIVICTRHAVLQAMQ
CL6249Contig1	Esi0107_0015	313	E. siliculosus only	signal peptide	1	PF01963			7 exons, 5' and 3' UTR	-2.35382	-3.77604	-1.89385	1.02722	0.571896	0.594695	MMGIRSLSLVLPLACSPAESFVLPATRLRSVAPLRLDCDVQYSRGAARSGTDAAVKGRERFMSMELGLNPVKHRCSCQPVGAHRSRSLPLRSKQVQASAEETNLSADPTQETLPECISNDAVSYWVHPAKESHIWLVGVVHGAKSGVQLVEEAIGGIRPEVVMVELDADRICVLPPGEAMEEGSADVDEDGDEDGEYAEDDEDVDDEEESVSPMIEIQTAVREAGACGARVLLGDRDYETTGRLLEKAKRADMASAKERKEFNDLTTSFDCEVMAKNLMKLRGEQTTVAVIGMAHLDGVEKVLKGHGWQRRRA
LQ0AAB77YH24FM1.SCF	Esi0107_0068	108	E. siliculosus only	other localisation	2				1 exon, 3' UTR	5.8881	0.431546	4.63215	0.808062	0.920378	0.321187	MCAPTVVWLTTHGVIDGRRTVLCFFPLLVTRPLRVGFGFLVCVRVGDIPANDNCRITHVPPKGRGSHGSVFCFLRSLPWVRYKGIQAASCVFRVLYSGMVLCTLFGMQ
LQ0AAB10YM14FM1.SCF	Esi0109_0019	810	E. siliculosus only	other localisation	0				5 exons, 3' UTR	0.460793	0.632239	1.12563	0.26514	0.579324	0.157377	MFAHRTPQEECLQKKFVVFDSEIDLAAHTLQMHPHKPIKRQIQVNFKVKRSNWDGTGDEEKDAEEKKQDEEVHEWTYEGEIGDQTQPPEVLAARREAARRAARDGGMIGLPAPAPAPAAAADNFPTLSGGGGGGGGGGGRGGGGSRSGWAGLASSTRPRAEDFPALGGRGGRGGGGGSTFRSAVEAYPTRAQEIAMSGAGEGGWCFDYPMPPSEPTGGGGGGGRGRVAGIGNMKLKVDKKAAKRSKQKAAAAAAAAAAAAAGKQQTASKQQARGTSPPPVSSASHHPARSPSPPPPPPPAEAEAVVVEDFPLAPGMRAPPPSAQAGPIAAANSSGPTLAQSIAARQQPQPQQEQLGGGGGPPSVVMELKELLGEEVFAEVKEISASYRSGWMMPGEYFK…
LQ0AAB34YJ05FM1.SCF	Esi0109_0068	230	E. siliculosus only	other localisation	2				2 exons, 3' UTR	2.7695	-0.065052	-1.83988	0.554082	0.8816	0.918971	MCTFHASPSGEMVFNRRSPWPEERELVAHHGQRLRVSFVGDLTAKFHYTQNVIVPLKDVAVVPGLTCALMSFTKKQGRQDIILNSNGVSLMGGSIQFETCSNGNFIQGTRVSPADFPSRVVSAVPSLPVATASPPGGGLRPGALAASPVAAVPTEPRSSALVEESSRAQGFETPALCVQKAPTAVIVDNTLRRSATGGGAAAAAAAAMTGWMWSGLGHCCARSTRAHGSC
CL5267Contig1	Esi0110_0022	883	E. siliculosus only	other localisation	2				10 exons, 3' UTR	1.39034	-0.627901	0.275863	0.230198	0.821059	0.0899705	MPSVHEIHVELVRLLSATERLVAAGEPSASGSWENWPRFCQFITSLDSTQSQLQARVAEVSRGAGAGLSPALPTAEDLADYDRRLEILRRKRDDLASAAAAAALASAKNSAATDPSQQQQQATGTGGVVGGAVFVPQEDGDRVVRRREARGSSRRRGAKDSSQDDSGGVFGGRRPGGGKGGGGGERAADEAEADQVAQEISSMAGRLKESSVAINQTLRTQTQVLEDTGDAATQNVDRVKRENARVSERLRKKRAAMFASWCMMITVVVTFFATYFLVIVPFEKRRGPFVAARTSAFAQAAEPRERIPSEHDAAATAAGAATAEEIQRRAQEAYRETARRARGRHEGDNAAHRVAREEKEAFRHRQAERMMAANRDRKAAMKKNSQQETLEAGTDSVPQ…
LQ0AAA18YD08FM1.SCF	Esi0112_0014	346	E. siliculosus only	other localisation	1				2 exons, 3' UTR	1.81227	-2.62548	1.10012	0.148227	1.94884	0.356789	MPAFLTRRERMSSHTRRPRSGNIDMQKLKAAEEQRQQHSVDDLLEQEAQGLPSPATPTTPVSPQRSPAALIIDSSGAGAGSSSGSRLSITRSRTITEPAEQQQQNYHHRRVVSRSLPAAQQWRDAQQQWECEKQQQPGRHADRLWDQQDTSADVVLRPRGSSSSSSSGSSRGGGGGGGQAEAVKETVPSKRQRQLSWSTRRRESSSSGPIDIPPSPGQQQKPRKHSSFGGGHHDDDDASIFEGGGGGALAGVGKAATHAGAWYPCWPSTKPTDDDACGEGGVPPHILIWEESVLRRNSMQHEEERERRAVSALDGEGGGARGLLGIMRVSEGLTDDGSVDGHVPXX
LQ0AAB99YH09RM1.SCF	Esi0112_0072	146	E. siliculosus only	other localisation	0				3 exons, 5' and 3' UTR	-5.55411	0.0909877	-3.05629	0.303521	0.34944	2.10453	MRNHRMALLEPVPFKRWRKSQVRGFHFPAILPNDGSRGSSASSTGSSKSSVDEEKGENTSERGRHRPPEQGSSPPLPIVCPSPAFTRDMQVLNKHAWHIPIGEGQDGEPGTKWLCINLAALVEEEEDGQTAEQRPSEVIPRRKYRS
LQ0AAB85YP14RM1.SCF	Esi0113_0046	54	E. siliculosus only	other localisation	0				1 exon, 5' and 3' UTR, 1 intron in 5' UTR	5.86097	4.17755	4.81753	0.0557555	0.321186	0.219197	MLSLRQPSIPIGQPLPILSSLRITLEITKVTRATIAAARACSRLATQHDRQALN
LQ0AAA16YN11FM1.SCF	Esi0113_0079	443	E. siliculosus only	other localisation	2	52283			4 exons, 3' UTR	6.87621	0.517474	1.41905	0.304104	0.393055	0.538811	MSGASTVYLQVLDPTWMAHLSPMSRLLIVVGLTSVGADNVRFVDADRASFSYTSGDPEQPAQQPRISSTRTAGAEEGGGEEEGVSEKSGGGGGGGGARRRRRRLQTAGELGDGEQQQQQQQPRPGQVGLLEFDPRGRGSEFVLSPALSLPERLTVTADVVSPAYNPPAAAAPAESGDDQQRPGAAQTGGAPPVTRAVRGGRAGVSSGGQQGEETSAREPVCVKYLDTVGESVVQRSEWFPSPEDAASLRRAIDAYCPLSFLRSEEGEGEEEGVRRVLLYQRDQNRQILHADKVVEDLQERLGGGWIVDMMMHDSDRHPCELVETLAGVDVLLTPHGFQSMLGLFMRPGSLLFEVFPQKYFKAGYAPMAEGLDVRHAYSMSRALRPMMGHSHPSTETCMK…
LQ0AAB94YL23RM1.SCF	Esi0116_0062	59	E. siliculosus only	other localisation	0				1 exon, 5' and 3' UTR	3.15307	1.50888	0.722001	0.467827	0.68172	0.679146	MWQADRSRCSIRTQFPLESCQTTDGRVGALRCLTGDLGSGSFSGPENGRLSTIVHNGLS
LQ0AAB95YC21FM1.SCF	Esi0117_0038	58	E. siliculosus only	other localisation	2				1 exon, 5' and 3' UTR	0.652872	-1.19608	-1.08869	0.748294	0.180545	0.388046	MAEETNDPSRKVVTESRLYINTAVFEALVAVICATRLCRSVYGVGLLQDGCFRFVFLS
LQ0AAB22YB01FM1.SCF	Esi0118_0027	308	E. siliculosus only	other localisation	1	PTHR13291	IPR006155		3 exons, 3' UTR	2.08395	-0.836926	0.691034	0.226851	0.72293	0.248459	MYHERQRLMQCAMHALNNLFQEPWANRELMERLALELGNREATLRSESGLRRLLINPYKSVIPMVGDYDINVVLEALKLRECRVSLHVVFNAKDPTAFELALARVDWDSATIRGVIVNFVCRSLLWGSWVTHHFYAIVKAKGPGDGDDGLSPGGGEGAPQAAPAGGGGATRHLERVGVGVGVGVGTGASADGESEGDDGEQTGCFEKLSPSRRRGKDNRGRTRNRTSSNQGSCCGSDGGGAGGTAWYSLDSRIPKPQRLGGTRGLVEHLAWEVREHHGHVFVVGEGAEEVAGVGHDSDGHVGTAEARV
CL3341Contig1	Esi0120_0076	285	E. siliculosus only	signal peptide	1				8 exons, 5' and 3' UTR	-3.07027	0.312162	-1.44322	0.241418	0.156007	0.369526	MAPQGNLAAGGLHVLLLLCCCVQWSHGFIAVSPCFRRGCSQQTLSSTNDLHKRESRGSGRHGSLIRRRSGGPGFSLKANEAGGGAEEEDDTLELTKGFYSEIAARLGKTAQGQPQDSQETAKDEDSGSEIDKAIYDELRARRDFGFEQDLGLELEKRNITKEAEAKKIIDAGLEQMPGVTSSATFLPSSELTPREVVTSVLEALKNNDQPYHNHGVEVFIRFLAPSSAMHGVEMSGVARYLAENRNRAFMHWNTMAFPRPLTVSGGAKQNKAFQPVKLRDTVLHR
CL6495Contig1	Esi0121_0061	564	E. siliculosus only	other localisation	3	51695			6 exons, 3' UTR	4.33231	5.97318	3.9555	0.493435	0.397074	0.566897	MAAEAAKATHSQRQQIVDPMPPSFMGSGKTAICHGDVCETGTMVVTTSGVSSAPRQLAPTLSPRSAATPLAPSSLDDSLVSPQHELSRDEEEGNPCLLRVCSSTAGRSDDSGTESAGAGYRFPPLFAFSSWRTRWPAVCGRRLLAALKFAWTTAMVTVTLLLALLAVAIFFWALSPVCTSCVRSSGQLPSSVVPAADEQGTSTLYINQLQVIGTHNSYHRRTYVPALSDYWDYHYPSLTAQLDAGIRHLELDIHYDWKTGRWFVFHLSILDAVSSCNCLSVCLAEVREWSDTHPTHHILFIEIELKLTGDFLQLCGEKTPDADHTAFRAMQETVIDEFPLDRILTPREVRGDYETLTEAVTATTSASELFVPTTISSTSAESSGSGGVAREGMAGGWPL…
CL3495Contig1	Esi0122_0074	53	E. siliculosus only	other localisation	0				1 exon, 5' and 3' UTR	-4.62673	0.815918	-1.22683	0.371345	0.270386	0.701929	MERFGCALMIKNTNVVAHDLWEECPWLPCLELFPLQGINSQSRGEGDRSVKQR
CL4687Contig1	Esi0124_0077	212	E. siliculosus only	chloroplast	2				4 exons, 5' and 3' UTR	-8.4463	-1.18894	-1.72459	0.477138	0.443318	0.421053	MDRFRGVLLGIANALLCIQHAASFAVQQPILASPSVQHHVTTAAGRASGSALVMLRSRGDQRRRGGSSRNRRDISRGAAAVTTLRISEEDRERDLKFERELDRDAQRWINGDAKKQELWNKAKSWRNLNKLLLAREEAMSELERETLRYFLKDVQTVTGLPLVEENEITPLAWCITLTIQLMPLAAIYIIVFSIATENNPQPVLDAAHPFWA
LQ0AAB43YN05FM1.SCF	Esi0124_0077	212	E. siliculosus only	chloroplast	2				4 exons, 5' and 3' UTR	-8.60786	-0.494995	-1.45293	0.254894	0.499358	0.517237	MDRFRGVLLGIANALLCIQHAASFAVQQPILASPSVQHHVTTAAGRASGSALVMLRSRGDQRRRGGSSRNRRDISRGAAAVTTLRISEEDRERDLKFERELDRDAQRWINGDAKKQELWNKAKSWRNLNKLLLAREEAMSELERETLRYFLKDVQTVTGLPLVEENEITPLAWCITLTIQLMPLAAIYIIVFSIATENNPQPVLDAAHPFWA
CL2095Contig1	Esi0125_0002	54	E. siliculosus only	other localisation	0				1 exon, 5' and 3' UTR	-3.97868	-0.0698535	-1.81115	0.17378	0.538932	1.81463	MSDVEEYLGVEERTLVVQDAPGQQGQEARDKGGGVILRFLQGMQPVSHVHWEQL
CL1422Contig1	Esi0125_0013	379	E. siliculosus only	chloroplast	1				12 exons, 3' UTR	-3.18005	0.330067	-1.17878	0.277566	0.274485	0.405163	MKSALATMAVSATAASFASAFVGSPLPLRALTSRPSCSTSAYRARPTRMTAEDDEVEPKVYYASEVTDGNKKTTFNREMGEQPLPENTATTRSDRYGPADYEGFVDSEGFDGGDGQVGVVGDGGNAMEQFDQSAVGRAQDMRAKVKASTMVQESKARQRNAWGGGSSGYADELKEQGMVSYNAAGEDISKVRRQQYENYRNQQEITRRQRADNSVMEAMTGTGTVEDNTSKWKRGGRSSYFDNINAAPEEAVDQSWNKYSAPVASGMKDGTEWGETTLTGNEKVEDTVQCISTSGRPGHATLNVKSTVMTFEPFHCTFVGDARGFKVTPEEGTLNRRGGDPQEFDVSYMGNGPGDNRIGTLVVETEEDKWIYKIEGVVG
CL4840Contig1	Esi0125_0013	379	E. siliculosus only	chloroplast	1				12 exons, 3' UTR	-3.48953	1.33026	-1.80769	0.396236	0.791131	0.65015	MKSALATMAVSATAASFASAFVGSPLPLRALTSRPSCSTSAYRARPTRMTAEDDEVEPKVYYASEVTDGNKKTTFNREMGEQPLPENTATTRSDRYGPADYEGFVDSEGFDGGDGQVGVVGDGGNAMEQFDQSAVGRAQDMRAKVKASTMVQESKARQRNAWGGGSSGYADELKEQGMVSYNAAGEDISKVRRQQYENYRNQQEITRRQRADNSVMEAMTGTGTVEDNTSKWKRGGRSSYFDNINAAPEEAVDQSWNKYSAPVASGMKDGTEWGETTLTGNEKVEDTVQCISTSGRPGHATLNVKSTVMTFEPFHCTFVGDARGFKVTPEEGTLNRRGGDPQEFDVSYMGNGPGDNRIGTLVVETEEDKWIYKIEGVVG
CL5761Contig1	Esi0125_0041	73	E. siliculosus only	other localisation	0				1 exon, 5' and 3' UTR	-1.55872	-1.09402	-1.56357	0.298915	1.20813	0.679026	MLEPSEDLKNTHTISKKRVHKPEEVHLQSLQHVCVLTTELHAHTLQFDYNSGITPLVPHFTKMNVCRLPRTAV
LQ0AAB50YN24FM1.SCF	Esi0125_0074	317	E. siliculosus only	other localisation	1	IPR006025			5 exons, 5' and 3' UTR	-4.17182	-2.2763	-4.1313	2.24649	0.746824	0.547854	MVERSAHDMGLADLRELMLDLAAASLDEEVNGSCETETCRALVAVVDAMPAREYGDAFSSLVAGLCDPSARGLESRVTTFTWPLLARNVPFKRSSSSSSPSHGSSGHGVVVGGGEGGNNNNATVAADITVAAAAATSAAVVPSLSHEVCHRLLKERFLKDTSYADAEESPQGLGRALKALDVLLENEDDVLESETQEGYKRQYVVVALANEMAAGSMAVSRTAKPDGDECKKMVRLLEAINRELTSVMQNSVQMSKTLLDLMKSKYTPFLPASSGVQSKLSFGGKTVTSFGGEDSSDDDDDDDDDEEEEEEDETESQ
LQ0AAB72YC02FM1.SCF	Esi0126_0053	52	E. siliculosus only	other localisation	0				1 exon, 5' and 3' UTR	-5.41086	0.985908	-0.0571032	0.440643	1.05753	0.471522	MRQLEYSINVPQFHRRYTGRWQPFDRQYCYAQQQPQVIACQAARLLSIDSVV
CL2922Contig1	Esi0127_0020	303	E. siliculosus only	other localisation	6				2 exons, 5' and 3' UTR, 1 intron in 5' UTR	0.168122	-2.22404	0.515357	1.12814	0.309698	0.690144	MAHRGTLSPRWQGASSVRSRGADVPDKEKEILADPERSGPVHAIRARAPSSYRYIFLATLEGALSASSFRSSCAVAVPIFSAFPLHNPAEEALLPASASAFAVAGAVRSGAALALGTPFFLLAARCAILALNRVRIPAVQRLQLQQPRLGFPLPTGVDENVAVDLYVIGLSAAVLGGCVPALEMAGTFLGDALKGRSPVWVVLAFLVLIPVTYLALGAWLNLSSPGEGFIARTRPTTAMWGLCAAGHVILLAACFYSPDVSRTLGFLLGLVHIVRTLLPAFAYPAGSGSAACEEDDMSASVHL
LQ0AAB11YJ07FM1.SCF	Esi0129_0068	233	E. siliculosus only	other localisation	0				3 exons	4.76794	0.367023	1.23868	0.379892	1.12319	0.57343	MCQDQGVFSQLVTVLADDLSFYYLFDLNVPGYESAEDLVVSSGPSSDAQALACPVDEEEEEEEAVTPVPTPEQVIDEEEEEEEEEEEEVETPSPMTAVEEELETTPAPVTPEEEVEKVPVTTPAPSSPPDSSTAGQGATSSSTTAAPVGVDTPAPTPASRGLETPSPSSAAVDAPSASSQAPVAAAAPTLPPAPATAAPAAAAAADTLPPTPPAVTPGPTVVPPSGDKVKVKG
LQ0AAB8YD22FM1.SCF	Esi0129_0068	233	E. siliculosus only	other localisation	0				3 exons	5.01661	0.209854	1.82319	0.405241	0.631181	0.613997	MCQDQGVFSQLVTVLADDLSFYYLFDLNVPGYESAEDLVVSSGPSSDAQALACPVDEEEEEEEAVTPVPTPEQVIDEEEEEEEEEEEEVETPSPMTAVEEELETTPAPVTPEEEVEKVPVTTPAPSSPPDSSTAGQGATSSSTTAAPVGVDTPAPTPASRGLETPSPSSAAVDAPSASSQAPVAAAAPTLPPAPATAAPAAAAAADTLPPTPPAVTPGPTVVPPSGDKVKVKG
CL3720Contig1	Esi0130_0017	811	E. siliculosus only	mitochondrion	10	57850	PF00097	IPR001841	9 exons, 3' UTR	1.44626	-0.510427	1.66538	0.330318	0.62706	0.195519	MWACVLLAGTLRCITPPHPQVIAEHASLHRAGAFFTGLFHLVARGAQPVLIVLKVDGQLEGPWSSVFIPLWMFMGAIALGGSALCCCAPTVSRGVIPEIRPLLIRGMLLCSVGTFSLAFCALLFLVFLTLELDNNENFSPRTILAPLIALYALILVFLPLLLLVTRHYVRTMRTAEEQFRQANDPNGGGGMDASSTAFGGVDDVEAGRGVRGSPPIGGAEEEEGAGTGPEGGRRRRRRGSSVMAPTILMRESSMLFRRASASFCRRLGEADGSLMNPDVTAFEVRFRAVELADWGRRGGRFRSRDSDIAAIDDGGGSEERGERVPQRSSRSFHVLQDCFPHARGAVRRGGQRFTAAVTGSSSREGHERFSVSSGRQLAGAEKEGSPRPRGEDGATSKRT…
CL2832Contig1	Esi0131_0054	55	E. siliculosus only	signal peptide	0				1 exon, 5' and 3' UTR	1.1298	0.466985	1.1857	0.296806	0.523251	0.151107	MSWFLEAGWYGSKCFRRSSVSSSTSGARYPRGTATIMCIGDNPASAQARLHIGSR
CL333Contig1	Esi0133_0037	176	E. siliculosus only	other localisation	1				5 exons, 5' and 3' UTR	0.870913	0.606959	1.21089	0.162038	0.209924	0.175269	MASYKTQCEEVLRSKGIANFARRVGRGNSDWETLVFDVGVDGWSAHFSVNINQKGNMVHILSQPEWKTMPSSKLAQTLLFVTLLNWEVAVGSVDLDMNDGEVRYKTTAEFGEAKDIKPILATFLDYHFSCGLRYLKAFIAIRDENVSAERAMEIAGHRGGGSSDGLLAEIVRTTLQ
CL1068Contig1	Esi0139_0015	91	E. siliculosus only	other localisation	0				1 exon, 5' and 3' UTR	3.83652	4.59871	2.40962	1.07398	0.514089	1.87602	MRRGSRRLDCVCFVPRRKLIVLCVRYYDRRTRFDGGSRPSFGTRCWLVLGKWLGRYRDMVFLLRSETVATVDNSGIAVLSFQVKQSTCSVE
LQ0ADA13YE22RM1.SCF	Esi0139_0054	52	E. siliculosus only	other localisation	0				1 exon, 3' UTR	5.98552	1.68975	0.247377	0.894003	2.76628	1.48963	MPTNTSDPPAAAPTPYRPDRHLPISISSSTVFAPPSPMTTHTHVRPYIYTLQ
CL7224Contig1	Esi0140_0060	68	E. siliculosus only	other localisation	1				1 exon, 5' and 3' UTR	-1.28828	1.28466	-0.303195	1.16477	0.151119	0.576977	MQEAGWCIDGTMKTRKRWFENYCCVAQLATVFRTWMDLEELYAWCYLGSACFAAACGRIFVAPLTNED
CL463Contig1	Esi0140_0079	146	E. siliculosus only	other localisation	1	PTHR12922			2 exons, 3' UTR	1.36346	3.24858	1.21494	0.466389	0.427444	0.438706	MYRARALTDAARYREVHDLWHALTGLPATVEGELALKWFELVQTGLPVCALSAVLGPLALPSKEPPAPTTTPSSSDSSGSGRKRRGSREVLARTFVPWAIRAGRRARRPLVCVWYEKRWEQPLELVRRDLGVEMAPQRGKGGEAPR
CL7149Contig1	Esi0141_0040	172	E. siliculosus only	signal peptide	1				4 exons, 5' and 3' UTR	1.97954	3.40243	0.169866	0.981294	0.237064	0.698969	MMKPTARGRLFFGVVLLVLAASGEAFFTAAPAPAVFKSRAYRITTTNVNAVRHGGQQDQQDPELSVFDAGETAVSWEDYKKQKPDEFKLDAVDEMQCWKTDECPVEDEKKFTKAWEIHSAERNPTMETHFDSEGEWEEESKGAWSKKWHEDVGEDDLHEDTVSPAAKDGYGI
CL6265Contig1	Esi0142_0047	430	E. siliculosus only	signal peptide	1				6 exons, 3' UTR	1.8218	3.4909	1.2823	2.63608	0.369934	0.878567	MVVAVVAVLLLFLLVPYFTANTCAGNSHQQPSPYRELQDLSERLTNDGRDALASLRRELEVEEEKRLAEERGNLKEALARENRRTWRRTCGNRRNVPHPPGGKRRSASWEQEEQGLRAIRDRSSAERKAALKRIREEGERRCLKELKALADGASQKNEAWLRMVLGGLGKKKQRGGETIMEGTTTAASENGMRGGGGGGGGGGIDEDGGSVSPALRLRAVEASNNCERLGRRLVELVIKEASMRLRESDFDVTPREHKARESGTTASATASIGNINMKKRDVDKTTTEPQDLAHRGRNQHRTGNSCSGDAPGEKRCQGCDRLAHANVELTRLLLQTSTMRAREEGRCSDTPITANTPPSPPTAAAHAQRQGTARTARAAATRNKHRAATTAGGVVNRKK…
LQ0AAB63YI18FM1.SCF	Esi0143_0016	421	E. siliculosus only	other localisation	0				3 exons, 3' UTR	3.86549	-0.676159	2.63645	0.833946	0.498423	0.667047	MAPKNSPPSKGKEAVKDLKASASPIAVAQAQVAHTFGKLTDVIQELQDAVEKERVAVDTDKLNKPGHGAHNFGQPILPLGDLKDRIDDTMTNTLYAFIDKFNQFPKTAGIPQLLLPRLFLECFNDVQEHYRQFIEPILFPNGSKTDPALLRDHLSNNYQELFLLTPSEKRDRTVQHILGNIGGHLRTQRTFADNGLNWVINETGLDALVHKYREIMVHVRLQPTPATFSTDCGMFLEVVKKKPWSLTVQQPTAAGVQPFDPKRHSSSVDAMGTSEGDLCVVVFPAMEVDGVRCNISYTLSLDRHQAELVATPGQNPTRQPPNQVDVHIMPVRDQLDVWNSTPESLKTVEQLRKTVAVIGKMLAALEHLPGYDARNAFSDLGQDMDQARYSRWGARVRWF…
LQ0AAB65YK14FM1.SCF	Esi0143_0016	421	E. siliculosus only	other localisation	0				3 exons, 3' UTR	4.07498	1.89912	4.41325	0.533949	0.471198	0.107503	MAPKNSPPSKGKEAVKDLKASASPIAVAQAQVAHTFGKLTDVIQELQDAVEKERVAVDTDKLNKPGHGAHNFGQPILPLGDLKDRIDDTMTNTLYAFIDKFNQFPKTAGIPQLLLPRLFLECFNDVQEHYRQFIEPILFPNGSKTDPALLRDHLSNNYQELFLLTPSEKRDRTVQHILGNIGGHLRTQRTFADNGLNWVINETGLDALVHKYREIMVHVRLQPTPATFSTDCGMFLEVVKKKPWSLTVQQPTAAGVQPFDPKRHSSSVDAMGTSEGDLCVVVFPAMEVDGVRCNISYTLSLDRHQAELVATPGQNPTRQPPNQVDVHIMPVRDQLDVWNSTPESLKTVEQLRKTVAVIGKMLAALEHLPGYDARNAFSDLGQDMDQARYSRWGARVRWF…
CL4160Contig1	Esi0143_0038	242	E. siliculosus only	other localisation	1				6 exons, 5' and 3' UTR, 1 intron in 5' UTR	1.7522	1.85578	1.19057	0.103785	0.27153	0.513964	MKDSKSTRFNYGGSGDPLRDAEALVSFIKMEDGLLSEDQHVVVELESSANVRFLHARAEAKSLSAIVALGGAGAGGAADEAHYLWPKFAAGMTYNSSFVDSMFGQAFYRPSRIALLNRLLLLARGEQQEQPGMASRSPPQGPNQGETRSPSETGASPGLEGDGLGRECCLRQMAVPPSLLGHSFGEMFQHLAAPPLRCVAFALLRARGTRNAPEPYVYTGPRADTVLHPGDRVFILGRPPVL
CL2410Contig1	Esi0145_0006	108	E. siliculosus only	other localisation	0				1 exon, 3' UTR	2.80803	0.825807	2.57438	0.0356319	0.490638	0.293391	MATATSTASGAVSGGEVDVSTDAEVGSSSSSSFSSCSDSDDGDAGDDIDFLFAELMAEDIPEAVAAAAAAAVEATTTADQELLLYLGGGDGGHAPVSAVTDMGCVRAI
LQ0AAB41YO15FM1.SCF	Esi0145_0015	56	E. siliculosus only	other localisation	0				1 exon, 5' and 3' UTR	-4.67444	-1.53672	-3.36529	1.27766	0.741509	0.500393	MDRGRDPPYSHRELQDERVSSTFSAAFTPRFTHARTVVDNHTKSAPSVFFLSCPAR
CL5623Contig1	Esi0145_0071	422	E. siliculosus only	other localisation	2	53335	PTHR14614		5 exons	0.0385276	1.48734	0.418153	0.0865979	0.128855	0.170993	MPMTNHDTEPEDDGEGSSDSLDDLFSEIWERESQPELRFAIIGVGSVVQTQDLQGHRWEVNNFSNTVWEAAIWMHHFFQDERCFPPGWLRGRRVLEIGAGTGLVGLTLALLGAQVTMTDLPEALPILRHNTDATFATLNDDEGDGDHNNDRNGLLGRKNHDHAADRESCSRPTIQELCWGNAAEAGEVAAAAAAVDGEGSEWEGFDLIVRGGRHEGFLEMLNLNGFHVRALDPTCADDLRARVSGDDAEGSRSCASRIGGGSATTVAGDVAGGAAVVAAGGTGGRSGKWPGPEWKRGSLPLERRKIHLDTQTHSETAARRGRGGGRKTAADSPANGTGEELAEDVADGGIGHLIAPGPRKGSRRGNDGSAISAKRAVVGGGGVGRGWGYKESGLGKILA…
CL615Contig1	Esi0146_0058	152	E. siliculosus only	chloroplast	1	PS51257	PD069352		4 exons, 5' and 3' UTR	-2.90107	-1.08611	-1.56398	0.652928	0.410969	0.155919	MAPVGRVVGGLVVVCACLAPATDAFFTGVALPSSRAGAARGGNGALEMAKHRQNKGTKKHVKNRPRKSRLSDRNRKPTDYSIEVNTNGNFPGAPPVFELESEPEEGIDTKASVIEALASAEWDAEQAAKPAVDESKEMEVIMGGDWKVLETA
CL3541Contig1	Esi0147_0016	139	E. siliculosus only	other localisation	0				3 exons, 5' and 3' UTR, 1 intron in 5' UTR	2.74716	-0.481182	1.53831	0.540046	1.32535	0.758113	MDVMHQRAREEDWMPAGRPPSGRRRSLGNRRCILRGEGLCRTESGEHDMDTRGALARTEEAALKDLVAIFKVESEEHLPVSFDVHRLLELEEGERRSFVKNMLQAYSSCTDATPMSIDSFIDKYLEQTRILAALLAAGI
CL7025Contig1	Esi0147_0055	149	E. siliculosus only	signal peptide	1				3 exons, 3' UTR	-1.93031	0.742523	-2.29966	1.01292	0.285366	0.227144	MTARLCVVALTFASLAVLSPCAAFLLASRGRAPPGTRCKPAPSRNSCAAALPATTKVDITPDLVRKTAMLAQIQVDVLAPRMEEFLGFVETMKEVAEASDGAFATLNCGSDFLREDSADRFSNVAAIMENMPIEEGNYLRVPKVGEDEG
CL1784Contig1	Esi0147_0065	179	E. siliculosus only	chloroplast	1	IPR010916	PF04969	IPR008978	6 exons, 5' and 3' UTR	-2.04111	-3.52771	-2.55972	2.05992	0.611398	0.425622	MRLETLLVAFVPVSVTAFSFVSKLRPNQFSLEVRPQVMSRYRTGRASRPRTLRPLWMMSFGAGATDRYSWDETDKEVNVKARLPAWAKGKSVVLDMTNTHVKLFLKEEESTPIIEGDLRGAILMDGSYWTMETLDDNGKMLYLTLEKAPQLTGLGPWMGVVQGGGDSCHGSRGEEGTRC
CL2196Contig1	Esi0147_0080	188	E. siliculosus only	other localisation	0	PF00498	IPR008984	IPR000253	4 exons, 5' and 3' UTR	1.03054	0.0055283	1.25305	0.320522	0.705909	0.191139	MLMQLALAVTNHQGLACREGGEIGPQLMFESTDGSRFFVGREGATLGRRQTNTIAFSHESGGTVMGIDASISGEHARIVYDEEGDFLHIMDGTPTKPSTNGTWFRLSGMHTESRPYPLSNGAEILIGTVRFSVTLESMVVEKELTVDNRNHFMSLAKDQDRRSSPPWGAGRQSGSRGGRVDQANRSGR
CL2053Contig1	Esi0149_0012	213	E. siliculosus only	other localisation	0				5 exons, 5' and 3' UTR	-1.59434	-0.111254	-1.82453	0.18313	0.45091	0.440778	MMSSEGVRERLGIMRSHLKSGVCAGIIQKHVPDFHVSKFPPVANQIFKDFFEAHRKGDTRALAGLTTEELYASLKGEIKSSKSRGAQRAAFRLVDFKEPTTVLQMRVDRKKHISPKEGWGQASFWGWDISVVTCRLCSERQLLVVDAKGNEVEAKADEDATTAQNVTVGVFEAFFGDSAGRWRLALVQEFAEAPAGATSATGKTKKSPQAQAQ
CL3919Contig1	Esi0149_0043	1273	E. siliculosus only	mitochondrion	4				13 exons	-2.79307	-1.35152	-2.00306	0.447647	1.11046	1.26086	MMLKTPTRSAKAVPISPSGGGVASRSGCVPPMPPVNTPTSFATPVEKGRLPGSEQSLAILASLYVHIMIRRFVPSLATEMHLTIRLLHVHSEVTRSGGDRTLKFKQDRREDNSPSGSSAISSKEIRDGQHGTSDKPGMKIIFKTGLDCRLFAAGVLLGLKSLLPHIGTDTIDLLAESLALASQVNITSFGQLMEYRESEELIEDLRHVLCEAKGDGVHSDGNGSRNVGQQNADDTAIVQSVGAPFAALQWREEDSIKNWRTISDRSMFQNRQESVDRFGALLRDYQGSKKGLQQYPDRALQDLRTAASALISGLAPENLGWLAQYFLDQLVGWGLAPPEETDSEVMALVAPAGDKGRATLQKLHRRISTPSSGEDGNALKSSQKLRHPGTQPRQTHAKQ…
CL3969Contig1	Esi0149_0076	384	E. siliculosus only	other localisation	1				5 exons, 5' and 3' UTR	-0.878212	-1.86697	0.00607466	0.32783	0.216477	0.268083	MELNGAVKGHLEGLGKEIDTLIGHSKHGKGDTFSPTCWSKNSEDVDVALRVIGAASQSIHDGVTRLNLVYKANPSEVASESMSREMGGFCQQMVASLTLLSSVGASKSMVAYFSAGVRAVLHSLKDLIGALLDPSRHARLNGLTGTVWQSCKELQQAPKTNKLACRRQMMQWSVAVKDTIDEFVEAAKAAAMANAGKSESAGDKGGLDEQFAAKVTVGGAGEGEEGAEGTFDDFDFDGMDENYGAAELPCVEASVDVLRVFRRCLKAANDSLNSLDSPEPQEESGATAGSVGEGWLQGKLEWAKSVQTHLDDANECAGEVGILLYPPLDGGELLGRANDLEKSLAAFCEVFYACGEGTNSEMESPLRKAVVEKLGVLRAALKKL
LQ0AAB4YJ10FM1.SCF	Esi0151_0039	147	E. siliculosus only	other localisation	0	63748			5 exons, 3' UTR	-0.308348	1.30426	-0.166819	0.794372	0.216562	0.457293	MRSVPQGPAWATRTPKAGDQVAAKVEDEALWILATVEKHNEKKGFFVVVDDDAGDGKRRQFKLRRSNILTLPRPEEASGAIFPVGSRVMTLYPQTTTFYPATISGPFVEGRDGRIDYCVMQFQDDDPTPEGVLPHWRLPARFVRYRS
LQ0AAA1YA01RM1.SCF	Esi0152_0050	285	E. siliculosus only	other localisation	2				3 exons, 3' UTR	0.695114	1.42452	0.585826	0.254356	0.13157	0.474429	MTSWFTNGWLRLGSKKRGQQLGSKDENDKENEGWYPTNKKAKKTVKSAFAGAKPSNQGSWLLCQDREGRMYWWNDVTGQWTYQLYSSAQQQQQQGQGYLQQQQQQHLLQQQQNQQMMPQMHHQMSYPQQQHSAAHLYNTSSHSLTRSASMSALGGASPQVYMAQREPWGLVSPSTSTAMNHGASAAAASAVGGFGLGWASGLSSRGSGLSSRGSASSASAGGSGTRLSFFGLDDDDDDDDEEYEQLQGAAAGSAWDMFFDGRGRPVWIHSRTGARTTINPERTSL
CL3399Contig1	Esi0152_0054	64	E. siliculosus only	other localisation	0				2 exons	1.81444	0.539628	0.455181	0.166246	0.277457	0.156668	MPRNTPPGQKPQHLPVPGTALTAARYLQPLRQPELLPEPYPRLGFCPPLILWASVPRYFTLRSK
CL2666Contig1	Esi0153_0004	524	E. siliculosus only	signal peptide	2	PS50193	PTHR11006	53335	13 exons, 5' and 3' UTR	-4.22763	-0.194885	-1.73504	1.36915	0.413853	0.274403	MKKGTTRMLPPLLLSKILVIAAFSVLPSYGSHQLSNVEKRHHELGAQRNDLFREMQELLKQQQDEVAECRAALARSQSGAPQVGGGEGDPDTASLACAAPPLSASAQASAPAASQRRDTIATIAGAERAAGRAVDGTAFGEGGAEGEDSLPMDEIESADFANYFYSYAELEHQKQMLEDDRRMEAYRNSMLLNRDAFEGKTVLDVGSGSGVLAIFAAQAGAKKVYAVEYTDMAKHARTMVEKNGFGDVIQVIQGSAESIQLPEKVDVIVSEWMGYFLLRESMLDSVVVARDKWLKDTGVMFPSHATMVWAPVDDGDQKYRRDTDYQNSLSGWSTFSEHAMQRYGVDMSGLDKAYEEECAGVFSLSSLWRELAGHQVVSEPVTVKELDLHTCSLEDTKGL…
LQ0AAA16YN10FM1.SCF	Esi0153_0004	524	E. siliculosus only	signal peptide	2	PS50193	PTHR11006	53335	13 exons, 5' and 3' UTR	-5.8425	-2.87824	-2.62539	0.160944	2.40513	1.07441	MKKGTTRMLPPLLLSKILVIAAFSVLPSYGSHQLSNVEKRHHELGAQRNDLFREMQELLKQQQDEVAECRAALARSQSGAPQVGGGEGDPDTASLACAAPPLSASAQASAPAASQRRDTIATIAGAERAAGRAVDGTAFGEGGAEGEDSLPMDEIESADFANYFYSYAELEHQKQMLEDDRRMEAYRNSMLLNRDAFEGKTVLDVGSGSGVLAIFAAQAGAKKVYAVEYTDMAKHARTMVEKNGFGDVIQVIQGSAESIQLPEKVDVIVSEWMGYFLLRESMLDSVVVARDKWLKDTGVMFPSHATMVWAPVDDGDQKYRRDTDYQNSLSGWSTFSEHAMQRYGVDMSGLDKAYEEECAGVFSLSSLWRELAGHQVVSEPVTVKELDLHTCSLEDTKGL…
CL2573Contig1	Esi0154_0038	149	E. siliculosus only	chloroplast	1				3 exons, 5' and 3' UTR	-2.44721	-0.142837	-1.18092	0.362031	0.129342	0.261305	MHGALATLGLVVAMMASVSNAFVVPGPSQVVSGRSTRASTSQVIVMGRGDTRTTKGKRMRHSYGKCRPQKQKEVVYFEGEIVKKAAPVARRWENIEYDEASMPKPAPVEAAAEEVTEAEEADSAVEEASAPDGDAEEAVAEEEAAPAAE
LQ0AAB47YO04FM1.SCF	Esi0155_0004	815	E. siliculosus only	other localisation	4	IPR011046	IPR000409	PF02138	7 exons, 3' UTR	0.841304	2.11839	1.66504	0.36653	0.2691	0.937762	MSSDYVSQNLHHWIDLIFGYKQRGPAAEKAHNVFYYLTYSGAVDLANIQDEGLRRATELQIAHFGQCPAQLFGRPHPARGQRGQGVPRPVAASFRGLERWRESGRLASVRSVQRVPSVSLRQVGVRACRALADGRLLSVNGLGVIEQFNYAWRDWQLPAADSSAVAATTETGIETAAGGEEEEEEEEEEEGVVGGDSEGEPGVEAKSDTDQQQQLSSGSGTGGGGGGGGGGSGSNSPPRQRRRRRTQNNRPPVASGICVERRMVHFTHVPRIPLGARPAVDSRGEEAAGGPSDWPPPLPAPPVCFSPSGRYLFSGGHESGALLMWQFDYDNTGQVCRLGFSRRRIGLDASGGCVLCSLESREECSGASRLSFSVFRCAARWRCHGHSAPVTCLALLRAR…
CL1466Contig1	Esi0158_0044	127	E. siliculosus only	signal anchor	2				4 exons, (' and 3' UTR	0.0578581	-1.39885	0.0338249	1.16171	0.148957	0.350881	MGGIDCCARVCIGLSIPGIIFLIIIGIMFDKQGFYTSVEVDDPTAAASECYFAALLYVVAIGVSLGGICYDKNRRGMLVTTQEELAHGDESSGLLGREDSGYGSLTYLSQMPLMPQGYSRSDNYVDG
CL2472Contig1	Esi0161_0038	83	E. siliculosus only	mitochondrion	0				1 exon, 5' and 3' UTR	1.36514	1.21875	0.0284049	0.229225	0.209776	0.0204733	MVGATRAHVVFRRERVALRRPVTTQPQVILEYIIGRYMHQCSRGEKTSWDDGSAALIYECMRSLNTYVHMYDLCTEPLVVCAI
CL7634Contig1	Esi0161_0041	226	E. siliculosus only	other localisation	0				5 exons, 5' and 3' UTR	1.75567	-0.426768	0.982446	0.209603	0.429638	0.439301	MKDTHGGMAEFARTARLQGDDSSGEGAMAEGLATAFQCFQDGMGEKLVSLAQEQSALLSKLEASREALPVSSTGRTRDRSGRAEYNEDVEFIAKVMSQAPWYAQRVRALAQQKASLDARLVHLQRRSTGLRESLPVPMQRHLAERLEASSMAPFREQVFWASERLGRLGEDMIYVKLRDGRGWVFETLHGKKVLERVALSSMEDIGDADPAASGSSSSSVLKGKDR
LQ0AAB56YL16RM1.SCF	Esi0161_0041	226	E. siliculosus only	other localisation	0				5 exons, 5' and 3' UTR	1.76285	0.367567	0.660284	0.240365	0.537915	0.38713	MKDTHGGMAEFARTARLQGDDSSGEGAMAEGLATAFQCFQDGMGEKLVSLAQEQSALLSKLEASREALPVSSTGRTRDRSGRAEYNEDVEFIAKVMSQAPWYAQRVRALAQQKASLDARLVHLQRRSTGLRESLPVPMQRHLAERLEASSMAPFREQVFWASERLGRLGEDMIYVKLRDGRGWVFETLHGKKVLERVALSSMEDIGDADPAASGSSSSSVLKGKDR
CL4860Contig1	Esi0163_0052	124	E. siliculosus only	other localisation	1				1 exon, 3' UTR	0.978117	0.11962	1.20135	0.115218	0.223258	0.171311	MLTVGQDTLEGLRRTGAALFIFYLTARPVRLSNPPPPNENAVASLPRRDWLATAHATRTCTNSRADRLSVSSRLCCTPFFLLFLLSATRPILFRGGLGAPCCGRTASFDGGARSCLERVRAELG
CL7734Contig1	Esi0163_0072	56	E. siliculosus only	other localisation	0				1 exon, 5' and 3' UTR	3.57393	0.084733	3.37653	0.51557	1.45781	0.332546	MRKRAPTDRRVVSLALHTRTTANSSKSGRIDWMQPWLKPADDIVVNSISHVAWSMP
CL2560Contig1	Esi0164_0054	182	E. siliculosus only	mitochondrion	1				6 exons, 5' and 3' UTR	-0.0724737	0.855805	-1.76896	0.255243	0.248372	0.292059	MVDVYSLDSKEQQRVAKALRQALGEDVEVSSPPPLLRSELKGIKLREDGRDGGRLILLCHYNEGRVLLTDEDGMYNDFIMEACRVTGGNVFVALAPVSTSATSLANETLVTALAYSGGQQGLLSIHIQKRFLTWNKAPSEAQVKCFRPPLDGTREPFSVPESVLEHSEGRQGGRASSFCNIL
LQ0AAB24YI08FM1.SCF	Esi0165_0034	201	E. siliculosus only	other localisation	2				2 exons, 3' UTR	2.62792	1.09473	2.25688	0.186557	0.465333	0.208228	MMRAVETLRQRLPPSLGYAPVLLSDSDDDDGDGGRGEFEIAGGNFGGSRPQDRDLRRPRRRVGGGGEAGVGATTTGGGGRQEEEDDLLWPPYTPLYTNMKVLRRKRLDASMMYSRAGPCTKICFLTSLWGVSFLTWLGFTLASGSPYIIPEDSPATNLARSRSVFGAAAMYLVCACLTGYSWYKSSWGARPLPTMGDSTLP
CL6988Contig1	Esi0165_0064	61	E. siliculosus only	other localisation	0				1 exon, 5' and 3' UTR	0.378965	-1.06675	0.294496	0.271461	0.12958	0.242483	MVLLSTARRALVVRRHPSVPQTLTPRPTCNYVRYDEGSGGGGGGQVYERSGTGNVVSKAAY
CL1078Contig1	Esi0166_0043	353	E. siliculosus only	other localisation	7				1 exon, 5' and 3' UTR	3.10663	2.18394	1.52416	0.246725	0.532452	0.157661	MSVAPVATVSPVFSDEPPTAVILANEPVPAEGGGWISATSSPGGAAGASAVVVEEHAADVESGTRRPIPTRAAAAPAAGGPTADDVEKSCGLTSRRWHQLFALGIGLLEAAFSLNNAIAEDAFKIEDAASFVFSASAVQESVGLAVMLLLSLCRARVGEQDAVMEEFGSPLAILVNGVRQTDRSLTKTGHFGAMCQAAVVAVTGLVLLQKVDARGFVILFYALLVLFCGFCLVTNTVFCAGYFRNLVVVSRLDSALDPDNPAVGLTYALIALPLGVDVAEILFLFLGGQSWNATILALLDVGVTAMVVFPFGYKRFMTAFPEAARRLGLDSGRACDHYYCCCNLETLLYVVFV
CL4743Contig1	Esi0167_0017	102	E. siliculosus only	mitochondrion	1				2 exons, 5' UTR	1.48153	0.355852	1.14126	0.31997	0.478454	0.367645	MGNTAAAEAAKESSTLCLMLFTRLAESNTNQRAGGWLLDLARQPVPEVRHAAYAVMRCAAWQPGGWGLSALLPQPGFLEFLEKRDTAASKVRPFCCSSPQSS
CL6832Contig1	Esi0167_0079	231	E. siliculosus only	mitochondrion	1	IPR000504	54928	PF00076	6 exons, 3' UTR	-1.08258	-1.11212	-0.215043	0.168611	0.387092	0.592778	MVTLKVDNIAFTCSPEELREVFEGCGKLGDVYIPRDMRTGEPRGFAFVRYLDKRDADYAVDRLDGTRFNGRELRIQYARKRRPGGGGGGGGYGGGGGGGYGGGGGGYGGGGYGGGGGYGGGGGHYDRGGGGGGRDDRRGGRSRSPRRRSRKERRRRSRSPNPVGGGGSRSGSRSRGHGGGGDRWEERDGRKSPRDDNGGRGGGSRGDADRYGGERRGSGGGGEAPKHGGAD
LQ0AAB30YL24FM1.SCF	Esi0168_0065	173	E. siliculosus only	other localisation	0				1 exon, 3' UTR	2.60518	0.445607	2.62147	0.0902928	0.102786	0.298828	MPCHQLHHRTTSLSRTGAAAEPPPLARNPPXXXXXXXXXXXXXXXXXXXXXXXEAAAAALYPGVAAPSPYARPGPPAPAPAPYVTPVAPAPSPYAAPAPAPAVPRPRYDPSTRPRTPVPSAAGPRRSGSGGGRAMEGNMADAMEHCKFALRALEKKDVDLAVQKLHEALQQLT
LQ0AAB16YO04FM3.SCF	Esi0169_0002	86	E. siliculosus only	other localisation	0	52540			3 exons, 3' UTR	1.76527	1.43992	1.8769	0.228695	0.630856	0.395032	MHEATAIAFRAHVVSFEQGQRLAAEHGDHVRFFETSARSNVNVTEAFEGLATDVITRLQTQDEASLARVAPLKLGQEESTEKSDCC
LQ0AAB58YJ23FM1.SCF	Esi0171_0023	261	E. siliculosus only	signal peptide	1				5 exons	1.53036	-1.79071	2.00487	2.30506	0.833848	0.324137	MAGPTIGRLLPRRRTFAVFSLTLLLAVTGLFLAQPELLQQLTASHSRPQLRQSFEGGEDPLPGDSETAAATPAPTPPPTPAPSPPPTPTPFSFRYPVVVEKKAVSSRMRVVFLVGLEGTGHHYMADVLEDVCKKDKVRCPKLCVMAKVLYPELSLPKSRNAYWDARKRLREEMEKLAAFPEESLAEGESTVVSFGACRFQGTGMMSYPNFNGDEKALQYVDFRLVAEEAERAGVDMRFVYLARSAADILTSDSGHHNYGGS
CL7732Contig1	Esi0172_0021	753	E. siliculosus only	mitochondrion	1				13 exons, 3' UTR	-7.00012	-1.22281	-2.89099	1.5171	0.170372	0.812878	MVASRLFRTAGACLTICPFVMCGGERDGRVLSRQRTSSHSAWVSLPPSHIPFGGSDSTATTTSPWGAAPRPSAKDGSRVAQSLPSRKRRIAAALFYSLRDRRHGPAEAAAGETVVPGLPSISSPFLAHLGGAAHHARGRCAGGFQLGAVTAVRSPGDGGGAATAVEGGEELREAFNAALGEEEFLGLDGFRALADVRELLEDGLLRDSEVLAIWKAVPKADPAGDRVDFVGFSQAFARVDALFEEEEEEGGEEGVAEAGTSRGGGGSGVAVGPGETEASFVELVGSSEGVLDLAGLLRWSELTELFEEGLLKQEEVEQMWEGLPKVANRVQAAGEAGTEEGMLINLSGFLEFDRQLSDLFEDEEESGTGAADQDQPPTATSTAASTPPATPAAATPVVA…
CL2897Contig1	Esi0172_0028	232	E. siliculosus only	other localisation	0				4 exons, 5' and 3' UTR	-4.57336	-0.663343	-2.31401	0.34854	0.246981	0.546481	MTSPAAKTPGLEASNDPLDTLLARLLASTSEGSDDDSKGVAGVPKTSARGPMRAGSRVEDHDPWKALSDQVNDEISRQIFDDLDKQLDAQMMAELEKCQEEQSRLMDEELDRQIQEQLDAMLDANLGSELRDDQDGYEYYSDEDEYSSDEEGYEIERLPWSEGGEGGIGSLGLGESENGASSCEAHMFGAPKYTKDELDKMVDLLYGEGGAGKQVGPGAWGRGSWRPRGDKS
LQ0AEA4YD24RM1.SCF	Esi0174_0070	166	E. siliculosus only	signal peptide	1				3 exons, 3' UTR	1.93866	1.25334	0.59606	0.266171	0.21404	0.636943	MSVHLVVVDFFLWGGGGALGVGSGQQYRDNVLRRRRQICSGRLQARIPEHDYHRTGTGAVQLGRSIAVNASTKHDWVVKRADGTEARYVIDFYAGKAPPGSSMPVAMHLDVRPALDSYDAVVDRTRMFYGREVRPYLAGVLDAFKNDPGPPPSDQDAPPPPPSVAR
LQ0AAB26YB24FM1.SCF	Esi0175_0016	537	E. siliculosus only	other localisation	1	IPR000488			16 exons, 3' UTR	-2.70924	0.494642	-2.03836	0.315716	1.05997	1.30977	MVTRLSKRCRELDKGGVINEGSGKKAGGGEFLGVPAGLGSSLKYCIKKNGLGKAASEIARDILPSYDCTRERAAAIRGVERCLSEFCIVWSTARLLDSHAESATKSDFVFHLKPLLEHTAARDRHEAVLVLCRGIFTPQNDVVESKWEHHVFAAVFQPKSGGSSLASAFAEVQEGSAEHPRALRAARQAFPFLEPLTRWSWRCRTPETSSTDNDGETGTGDVNEDDTKAGREGSGRRKRGRDNTGVASLLVALAKADPSGETIKSMMRWAIEGLMPEQVGEAPWSATGTLADRNEVARCLMSTREMFSDCRDARHLSWMRACREAGDVLSLLVGVLDDDGLEGEDLTREVNHAMFVTTFLRSMPEGAKARRGYERLIGSGRVPGEDMSFSAERGSRERV…
LQ0AFA6YF08RM1.SCF	Esi0179_0007	83	E. siliculosus only	signal peptide	2				5 exons, 5' and 3' UTR	3.4271	4.9488	4.70069	1.78072	0.463819	0.234936	MISKSKTREARKRRPALRRSHLLVAILMSAMTVSVVESNSERRTLMLSAVLRAEGGLPTYGVEFGNAVPVLLMTTRYPTGNTA
CL1367Contig1	Esi0179_0008	68	E. siliculosus only	other localisation	0				1 exon, 5' and 3' UTR	2.35048	1.3956	3.18961	0.169858	0.235584	0.37649	MSSLLTASCGWVWLDRRQKAPTIRTLGLRRDATVVLLLLRDNTVVNVSGRAQVSQLFIFENHGEGIRM
CL2000Contig1	Esi0179_0009	58	E. siliculosus only	other localisation	0				2 exons, 5' and 3' UTR	2.602	1.68056	2.89402	0.608175	0.661906	0.281017	MVAGEEVLDMVTHATECSISLKYDGKMAMRLPEPALEISQLRLRPFRVPLEYCGTKRL
CL1843Contig1	Esi0179_0010	200	E. siliculosus only	other localisation	2				5 exons, 5' and 3' UTR	4.73156	1.16091	3.84932	0.335703	0.410484	0.453368	MRVPVVVHPEVPMACDAGSVSRPTGTSKDGSSWDGKIPPPKDGVREIASRPTIAAGSSGSRGGGHVVSLLALTFASAIKLGNMESNMLVELPSGFRCIWNNLPHLVQFAAIFLMMVLLYGVNRAFDKADDAMSTRLSRATAALLHERRHHHAPRPRLLLTTGDKVESAAVRDAAFLPERGHHAQRLGTREGTPALPPRVL
CL486Contig1	Esi0179_0010	200	E. siliculosus only	other localisation	2				5 exons, 5' and 3' UTR	5.44611	1.07296	4.73547	0.519347	0.940957	0.968889	MRVPVVVHPEVPMACDAGSVSRPTGTSKDGSSWDGKIPPPKDGVREIASRPTIAAGSSGSRGGGHVVSLLALTFASAIKLGNMESNMLVELPSGFRCIWNNLPHLVQFAAIFLMMVLLYGVNRAFDKADDAMSTRLSRATAALLHERRHHHAPRPRLLLTTGDKVESAAVRDAAFLPERGHHAQRLGTREGTPALPPRVL
CL486Contig2	Esi0179_0010	200	E. siliculosus only	other localisation	2				5 exons, 5' and 3' UTR	4.48303	0.74902	3.82748	0.222956	0.957187	0.430366	MRVPVVVHPEVPMACDAGSVSRPTGTSKDGSSWDGKIPPPKDGVREIASRPTIAAGSSGSRGGGHVVSLLALTFASAIKLGNMESNMLVELPSGFRCIWNNLPHLVQFAAIFLMMVLLYGVNRAFDKADDAMSTRLSRATAALLHERRHHHAPRPRLLLTTGDKVESAAVRDAAFLPERGHHAQRLGTREGTPALPPRVL
CL906Contig1	Esi0179_0049	67	E. siliculosus only	mitochondrion	0				1 exon, 5' and 3' UTR	-0.882215	0.783726	1.10507	0.894657	0.492817	0.0815441	MHVRLLRRANAVPFRLSFVGARPRLRLGERTFDRALGEAVCAAGGSATRKLYSHLPGLPCALPPRKQ
CL1445Contig1	Esi0180_0022	60	E. siliculosus only	mitochondrion	0				1 exon, 5' and 3' UTR	-1.43915	0.57206	-0.300369	0.216796	0.11697	0.14768	MARAIVSAREVSFSGGRCEANPVLRPGRTAKGRAPRRVSVMMTSRPAAGETRPLSFRFNI
CL806Contig1	Esi0180_0041	440	E. siliculosus only	other localisation	0				7 exons, 3' UTR	2.88335	1.43414	2.54087	0.0854455	0.197681	0.168372	MMATRPQSSGEGGAAAAAAVAQEEKSVPGVSKDALREERKPLLDLDDVAQLENELAACFDAPPPPPLNIRREEPVATVSTWMPMAEHRYVETHVAPPTASDVAAARARGELPQLLQEGQEQEGGQLQEQQAQATRVSDFSSLYSAAPHREESTGQLYPVLAPSAPFSDTMRIPMPPPAVPTAAPTAARAPSAAFGAAVRDDGAAAAAAAVAAAAEAAEAEASSLTTITATAARERSQDVSSSGEVVEELLSENERLRAIIQEMSDELERGSVPAIGGSTAAAGATQGRQSSAARAAARAATSATPTERLLGRYPGAQAEAARRRREQASQQQQGHRQDGGARPQTQVQPQVQAAVGAGTFVHFKCENCPQWLKVPVHAQLVYCPTCGHTSQMTSASTIH…
LQ0AAB44YF16FM1.SCF	Esi0180_0041	440	E. siliculosus only	other localisation	0				7 exons, 3' UTR	2.0425	1.3125	2.12723	0.114762	0.120371	0.232272	MMATRPQSSGEGGAAAAAAVAQEEKSVPGVSKDALREERKPLLDLDDVAQLENELAACFDAPPPPPLNIRREEPVATVSTWMPMAEHRYVETHVAPPTASDVAAARARGELPQLLQEGQEQEGGQLQEQQAQATRVSDFSSLYSAAPHREESTGQLYPVLAPSAPFSDTMRIPMPPPAVPTAAPTAARAPSAAFGAAVRDDGAAAAAAAVAAAAEAAEAEASSLTTITATAARERSQDVSSSGEVVEELLSENERLRAIIQEMSDELERGSVPAIGGSTAAAGATQGRQSSAARAAARAATSATPTERLLGRYPGAQAEAARRRREQASQQQQGHRQDGGARPQTQVQPQVQAAVGAGTFVHFKCENCPQWLKVPVHAQLVYCPTCGHTSQMTSASTIH…
CL6666Contig1	Esi0181_0044	490	E. siliculosus only	other localisation	1				1 exon, 3' UTR	-3.234	3.84871	-0.596883	1.26765	0.348512	2.37057	MAAADQAVVTRGGAVTVGALANEEFSMAAGKAGLEGDDGSLASSRAAAAAAAAADGSEGGVSRPALSVDDPRSTAAAAAVVVVADGDSPLPLTGACGEGDADPATAPAAAGVDVDPQPPVAAAAAAAMVVPECALLPPVACVDDEVAPVKTIVTAVSGGSSSSSSSSGADGMLLPAASLDVEGATAPEAFSGRSSGSTDELLMPAASLDEEGAGGGVNDPVPTDGDFAVPPGAAGKERQPLAVEEQSAVAAVLEVTHSSPVDDWTSADNAAASVAVEVTRTARTTVDGGGGDSTPEVSVERNGGDGAEESAAAAAAAAAVASERLGNGTGEACVELDKSSSPVASPPQGIDGADERGDDMATGTGMQEGTQESGQGAAERDSASPGLPTGYATGGHPTE…
LQ0AAB6YK13FM1.SCF	Esi0181_0068	224	E. siliculosus only	other localisation	0				7 exons, 3' UTR	-3.59672	-0.728052	-1.59888	0.207136	0.861688	0.827478	MDGVMSANTVLEGKAEVFGERLSALHARTHGGSYLARCLCAWRGEAARIRAERSKNVTAGDHARRKLMSRTLGAWRGETRQRINSRGRKEADLKLHAISKEIIGRYETELSSTRAALDDAISQIALEKARQREMEEGMRRTLLRGMSAMNMEAMRLMTEARDAGEDEFGLSGTTATTGTRYSAGGTDAPSFGARAAAGAAHHSRLSEEWPRPLTPPRPAVPSSR
CL5137Contig1	Esi0182_0010	78	E. siliculosus only	other localisation	0				1 exon, 5' and 3' UTR	7.29784	0.903136	4.1555	0.488796	0.584131	0.367451	MYVCRLCRSLSCVSCDTVLVRNHRAVCSGGGVWRPAVREKVLKHEIILHLVLYRQGMKRVQTYPLPQEIYSRNGLLRV
CL6220Contig1	Esi0182_0010	78	E. siliculosus only	other localisation	0				1 exon, 5' and 3' UTR	6.11759	2.07188	3.83551	0.473736	0.173316	0.364593	MYVCRLCRSLSCVSCDTVLVRNHRAVCSGGGVWRPAVREKVLKHEIILHLVLYRQGMKRVQTYPLPQEIYSRNGLLRV
LQ0AAB27YC22FM1.SCF	Esi0182_0040	344	E. siliculosus only	other localisation	0				7 exons, 3' UTR	-5.78583	0.566257	-1.51539	0.740701	0.268537	0.570378	MRQTKPVTHRHHRGCDWQALRRTDVPYTNFGCEIAIRFSSTSNPASGFTPGGMRTYIDDPSMPFYRVLSDWDEMAPVGGAEIDVADPARANQQVRVRKEGDPAWSTVSMDFVKEDGCWLIERLWIDDKSVAGGRSGGGGEVSPPPPAPLSVAELFDEDRLEMMSCKYADYDPACLAAEGGGEWLEERPNPSLSPKAVALTCILSLRQNDDGSGSDAATDDSGGDGEAAAAGGDAGATTGAGAKATKPRLNEGCERVIRFCSPTNVASTLTPAHFAQYLKEPWYAIFNQWDELSFHSEDISEDESTADLVVLLRPDNEEAWTSVNWELVKCDGMWLTERIWVVDV
LQ0AAB69YJ14RM1.SCF	Esi0183_0032	275	E. siliculosus only	mitochondrion	3				1 exon, 5' and 3' UTR	1.17229	1.72929	0.015007	0.149176	0.268647	0.210342	MTRVVLQHHAAAAARLFLRRAAAVNSSHLRPSSPTGASISQQQARTLHYTRCRSLSGSDKASTTSSSDDKDADATAQRAPNTGTPPAAGGIFGNLPARTAAARAGRGCLIALPLAGIGFSAWTCVTDYRRVRHELKLARVGLALAEMSYQRDAGRKGDGGGGGGDANSATRPTFDASPARSFSVALVADAGVLGFHLLAAYGLWHGWDPDPIVNAEIGNLVAAVVSTGGGLRGEYLAANRNAAEALARGGGGTPPSARGDGGGESSGGGSHENTV
CL7783Contig1	Esi0183_0039	378	E. siliculosus only	other localisation	1	IPR000980	PF00017	55550	3 exons, 5' and 3' UTR	6.28554	0.603621	3.00754	0.597822	0.6039	1.72518	MDMEEQRTRDLARAAGVVDRGCRLVWVTATSRMAGGCRQDDGGGSGGGWSSRRGKLVSWECLQESLMEHLREGTKTTRNWDDPIISPHGRVADTPQLEFIRGILRRGQEAVARARWGATGDECPEVDGGCRYDFISVEAFAKFSQWWAPLISTLGIIRNDWARTRPVRVHGFMSRLAAKRLLMQRECGTFLLRFSESKMGALVISFTQPSVSPGRRSLSVKHSLVEVKWGGRCCIQAEKGGMRCYASLHDFVRRIPELKKLYPDIPKEEAFGETPRSPPATASGPGAARRDELVAETESLIKGRMSALEGNRRLACPRTAKGGIIQRELTADIHEKPAAGTTSPRDPSEHPTPHTPGKNPLHWRNGSSGCCLQIHGHN
CL4804Contig1	Esi0185_0046	404	E. siliculosus only	other localisation	3				12 exons, 5' and 3' UTR	-4.78838	-1.46521	-2.65358	1.49187	0.189902	0.744993	MQDRSSVRTKDGVPIAFENMEYYVRMLTVFGNAQTDFYFSPPSAVIDGTASSLTIEVSALVPTEGSGGVWTVGIGTSGGGDGNDTLYTVGDLAAAGNTDWTTIYLTVPLTADEATGSLASYMDDNNEMLITLSCSQPGSTQVIFIDYMSITAAAGGSFAAMTPVSSSTGRCTYVDTVAGLEKEMFQDRVSVQAGDDVPVSFENMASYVRMLTLFGNAQTDFYFSPPSSVADGTAKSIVVGASALVPTEGSGGVWSVGVSSIDADGNSTLHTVGDFAAAGSEDWTPVTLTMPVTADVADYVDDNNEMLLTVSCSEPGTTQALFIDFMEVTAFDGDDLGEYSYSFDYSAMAVEGHYEQQAEETDEEDEVDADAASAPSVIVSGSFFPAAAATVLAVSLAGP…
LQ0AAB76YC22FM1.SCF	Esi0187_0004	80	E. siliculosus only	other localisation	0				2 exons, 5' and 3' UTR	-1.95324	-1.3711	-1.22426	0.199965	1.08558	1.00015	MAGKKEPPPKERGPSLLDPATARGPSLLDEASRSLSMSSTEMALEVSRIIGGVQWASDYMTFSALNSSSKTGGERMAYEP
CL4339Contig1	Esi0193_0025	885	E. siliculosus only	other localisation	3				6 exons, 3' UTR	1.31436	-0.53259	0.955473	0.184803	0.359443	0.377065	MHRNNAVASDIPSESPPPPAPVPALGRPRAPGSVSAVKDGKNLLSAFRRNKRRNRDAIGGGTTSTPPAIPVPHSYVNRSNPSSEGTLPADKSIVDDLGRFQSDAPSLARNLEAALDASLPQHRRAQAQHDNVAGGGGSVDGDGLTGERNGGEPKCEKDLQLATESRSNGGAVAVACGASGNAAELSAGDEAGDCCGAGDGDDAVATAAAATAAAAAAADAATAASKASPPKKDNNTIREESPPRPTPEIVRQAARTSQAAFLSSVLPTQDLDFDTANSDSSNPFTPTTLPGISLPNGRHRSPVVGPGEPGRAAGLGGGGVSGLGAAISAGSGVGPTSSDTQAAARWASMRRLEDQGAGLGNAADHQLARALQLCRDLRGQKAGVGGGSLSVHGRASRLD…
CL1847Contig1	Esi0193_0060	50	E. siliculosus only	other localisation	1				1 exon, 5' and 3' UTR	1.10336	-0.588725	0.179345	0.0682246	0.719572	0.265253	MLRAICNFESLNVRAHLYMYVLDQDVMTRGRNRKCLLCPSFLFLGVVSGW
LQ0AAB91YH22FM1.SCF	Esi0194_0024	93	E. siliculosus only	other localisation	0				1 exon, 3' UTR	5.50811	0.028603	0.284494	1.02788	0.478609	0.432845	MRAEHKLFASCWGTQPCHLDGGLRGYFKKTRREGGTDLELGRRRRGREGMTRPPLPTADWPPSGIKEMASFGCVVLLRVCQTGRPATPTQKRW
LQ0ABA2YL09FM1.SCF	Esi0195_0005	383	E. siliculosus only	other localisation	0	52047			9 exons, 3' UTR	2.48908	1.42717	3.60686	0.626027	0.756	0.400824	MAELSTEVVLHGIIRPYLCSTSKCALQRTCNQMHRLLDTPDAWETLDLRAHVIGRRTMKSGRQSILSRQPLFFLARSVVQQPRFSLLKTVDMQGLNLGAMGSTPDLLVTLFESCRHITTLNLWKTYVEDERLPQPQFSVETVIAQHLPGVHHLALEVDASNRGLRVLLEGCTRLKSLHIGSRSNQAGDSISMYPNDLGMKAFTAVGAPYLETLTLVDKVNIGAAGLRCLLNPSACPRLRTLTLVRTGRVNDHCLKAIAPAMGRLTSLTLDQCPVKPSTVQFILDKCPELTSMVVSTQHGLLQQPQDGRALLEYLLAQGPSRLSKIEVQRLSARGSVLGNVPYWLVQDPGLCATVLEWISPRIVIGPAETADERIAPFMAGRDP
LQ0AAB23YL04FM1.SCF	Esi0198_0028	1209	E. siliculosus only	signal peptide	3				12 exons, 3' UTR	1.92544	-2.99004	1.19173	0.146337	1.8697	0.445433	MKEEKRKKAGLAGRGRHVSSVLSTLLHVYLFALLFVFWCSAAAAAAAGRTAPASIRHRKRERRPVERFHQGAGAEGAAAGAGEGTAAVAAASWFRGDVQEPAADSTHAASRSAAGGAPSVGGVSGDGVAARGLLEGMEEEPDLAAIFLRMIGMQPDLSQHSDVAVASPAAAEGEETTGTGLAAHKRSWRFEDGKSDQEFAEKLIAGLDGPQREDLASKLIAELGQAGEEDLADTLLVGLEEAKDREEFATALAGAFDTAGRGGGGGELAEKLLSGLERDGEGQVQAATLLAGLDATDRLELAGALVDGLRRAGQDDRAHELSAGMDSARDEEELAVVVAAAFGSVRKQVAVAGRGGGAELLDNLLNAFLRKIERPAPVPGRVADEGEGQEALLLLHAAG…
CL1991Contig1	Esi0198_0046	57	E. siliculosus only	other localisation	0				1 exon, 5' and 3' UTR	0.42266	1.52137	1.33037	0.171666	0.128715	0.139253	MQVALKNGFFVPYRGIFGAKGCMARTHSCRSGLVELRVAVGVVFQCWKLFSRLVALP
LQ0AAA10YM17FM1.SCF	Esi0200_0004	338	E. siliculosus only	other localisation	2				6 exons, 3' UTR	0.00227385	4.05075	0.57346	0.203857	0.625855	0.636703	MASGPVSAKDLAPAGGKGEPPPTESAAVVAEARVPRERALHRRQRHQQQQQQQQQHQQHQQGVGDIPEPPKLPLGLPLPVSTAAAAAAAAAAAAVAATDTCPPADQVAEAAAAAAAAVAAVEAGVPCPTPPSRDGPSIARLLSISSGKTDSSLPEVTSGYCGRRHNANAGVKSLAPPKRRRVSFNHAEPALPGAPLGTDERSQLAPLRKCAAPSLARAETVSNRIDYSDLASVLMDGGFDACKDGAEVRSEAVSLGEDPYSDYALSAESDIFLGPYHRSTGSSSSAPATEPSRRGSSQIEQDKGLAVFDGIVDQSDATEGLEASVLDVDVEDPYYYYF
CL2630Contig1	Esi0205_0029	71	E. siliculosus only	other localisation	0				2 exons, no UTR	-3.87555	-2.43686	-1.93549	0.518996	1.24221	0.347268	MAMSGLGTVMFSKVLGPAKHGISRVGGRDHAERELRPGRLMQAHRHIFQVLGELHAGRLRICKGDPPRREY
LQ0AAB33YN14FM1.SCF	Esi0205_0029	71	E. siliculosus only	other localisation	0				2 exons, no UTR	-4.19409	-2.37258	-1.69517	0.435513	0.838237	0.367857	MAMSGLGTVMFSKVLGPAKHGISRVGGRDHAERELRPGRLMQAHRHIFQVLGELHAGRLRICKGDPPRREY
LQ0AAB10YF21FM1.SCF	Esi0207_0042	281	E. siliculosus only	other localisation	0				5 exons, 3' UTR	-4.4039	0.997245	-2.71064	0.595061	0.586612	1.1556	MWTASFTPMSGDQEKKYSQVYYEKDADGRPSEDGVFAVEDAKQVLTFASKYKGGISKNRIIAAFDFLKQRSEEASLAARREASLIRKQQQQAQDDADAAAAAENENGEEGGSGGKQEKTEEEMFALKKTPWEKNAESTLPQGGAGLVSLMGDMSNLEERIQGGWKLTIKAGGSSVDVLQRDSPFVLNPGGKLTAVEPSGPLLSVTKEGEWKLDADNRVIKLDFASSKWAGLVNTGGAQEGLEVLALDDKLLVALESRPGSGGEATGTRKFAVDKFRLLVRA
LQ0AAB11YL08FM1.SCF	Esi0207_0042	281	E. siliculosus only	other localisation	0				5 exons, 3' UTR	-4.77939	1.19937	-2.68005	0.506523	0.376101	0.946132	MWTASFTPMSGDQEKKYSQVYYEKDADGRPSEDGVFAVEDAKQVLTFASKYKGGISKNRIIAAFDFLKQRSEEASLAARREASLIRKQQQQAQDDADAAAAAENENGEEGGSGGKQEKTEEEMFALKKTPWEKNAESTLPQGGAGLVSLMGDMSNLEERIQGGWKLTIKAGGSSVDVLQRDSPFVLNPGGKLTAVEPSGPLLSVTKEGEWKLDADNRVIKLDFASSKWAGLVNTGGAQEGLEVLALDDKLLVALESRPGSGGEATGTRKFAVDKFRLLVRA
LQ0AAB22YO18FM1.SCF	Esi0209_0045	258	E. siliculosus only	other localisation	1	54637	PF01575	PTHR13078	3 exons, 5' and 3' UTR	2.0724	1.26278	1.23675	0.30372	0.289129	0.233057	MTATMHTTKVNANTTWMLLRQWRQYRPPNPRRTCGVFFAGSTPNCAASSRCYRTGAWVGSLRSSHRPRHLSVGGASSTFGDSAPGDVVSCGDPKQGREQFVVTGSLLDARRAGSDSPLPGQFLSISHAFGPEAVAAFAAHAGDDNPIHLDENYARQTGPRTYDGCIVHGLMVAGLFSTAFGRAISGALYVSQTLRFERPVLVGERVDARVEVERARVTSSGREVLVRCSTVASLADGTVAVSGQAKVLLPRTCEVRSW
CL3372Contig1	Esi0210_0045	51	E. siliculosus only	other localisation	0				4 exons, 3' UTR	-3.61033	1.61262	-3.4233	0.604679	0.659405	0.40103	MVRVFLAPQWATLMAHRLLSSHDPELKSIMKAFREGKPVSECVAALEGARS
CL13Contig23	Esi0213_0020	51	E. siliculosus only	other localisation	0				1 exon, 5' and 3' UTR	-1.5446	-1.55997	-1.24464	0.193144	0.525196	0.212777	MLKIIVYNIRVERSWSIALRRSTVVYRCTPPTKITRTPATQKRAPSGSMSW
CL100Contig1	Esi0216_0039	202	E. siliculosus only	other localisation	1				4 exons, 5' and 3' UTR	-2.87097	2.81993	0.64317	1.8917	0.146756	0.883456	MVTADSDRFKGIRRDTLHNEVDGCFDDLEEFEDRNETSPQYRVTHQECVLLNRVLSDKSTLPSACFVPPGAEAAARRASSSSQRPKEPRPLPEDGETAVVQLVRRITGAVQPVLSSLTTPLHARKKEMGGTITEEQCQALADYLSPSVGGGYLLPTACFGLLKPPDEEQAKMYVMQNAEMYVRLKKRHTGMAEEGYFPPTMC
CL2225Contig1	Esi0219_0017	491	E. siliculosus only	other localisation	6	IPR011004			9 exons, no UTR	-6.95721	-2.78361	-2.27648	0.593022	1.04972	1.37824	MTYIPTILYESTGLSENFRYALLVEVVFLVAGVPSQLALYTVLLKWVLAGRVTEGSYKPSVFQTWRRWYLGRLNTFVFAYLHVFNQCPRYEWWSAALGMKVGRGSVVLLEEFNPEDAHLIQIGCRSHIGYPRLSVDRPTGRGTEREKKAISIGSKALLGFGVHIGAGCTVGNGAMLGGYSKLRPGEHLTDGSVTMCDQQSAFQFGGSAPTSVPRDIHDDPRETVKANVIDAACTLGACSLNILALVASFEATKLAASLWSRGDSIDTRVVVLSAVALIVWALASAVLLAVFKWVFVGNFRLMSTAGTQREISARVGPRSTDIEKGSGGGQQEGQRRKTNKLTASQVMRWRWMQRFVYFSLFEPYIVNTVLKGTWLLNVWLRLMGADVSMGALILGKVSD…
CL2505Contig1	Esi0219_0034	636	E. siliculosus only	other localisation	5				3 exons, 5' and 3' UTR	-5.70455	-0.578442	0.785884	0.550923	1.83179	1.34244	MGSPSLGSRKWDLPTGTMNTTLVIGLAYIFLAYVVHPATQYAYLRVRAYRAWRRIEEGERVDVTNYPTWMELLGNCGRRDTARVVALLLLLFALASWILDLSIDVFPVPNPAYSQTLAPQVFKWPASNSTGASWHVLSLTEIDQEYEGDWLNQPNVFETVAKSRYYVKEYKNYVWSEPKDRYINGDIIVANWSRNTKPDNLVYGERATVMVDGITCSSGGEADIFTDDPIPVTLKNGTDAIEVWGTVLECDQGPAGIDVIGSSKPSIILTERETGDTHVIVEETSSEPSFLYSVWNATGASITAAAGNSSVEIAYAFHISSTVRLAEAVVTAIVNGVAGEGGGACFGLLRAYNRGPYDTVDFSDSYGKQKAMPFGEDPVSHYINSLKDNEHIIVGVEMN…
LQ0AAA20YO07FM1.SCF	Esi0220_0034	370	E. siliculosus only	other localisation	3				3 exons, 5' and 3' UTR	3.29772	1.2414	-0.992863	0.366451	0.166103	0.408924	MPFHHHHLPSCFFGRTPHHQIGLFAFTAYFVFAIRRRRDHRKILVPDITQGQVLANNVPGPDELMYRKTTYFQHEMTEVFQQLQQQFVALMLTILAHFVLGFRPILLLQIFSAPYHFSENRLLRKLVLGLKPGYRVWGERFEGELEGDKVKKEEEAAPTAVADGEGAGDIPALDSSSAVATSATVKAEADPAVAIAAAVAGGDDGSNSLPMPRELEDKLIDAWEAAGEGDFGAVMEQLGPFTVNTRTPALGWSPLMVACGLSQVCPAAEVGEGDIKAMVEDLDAQVDLQDQDGWTCLHWAAQQGRVDAARVIFEALGSIASEPTAAATMIQDLLAMRDAEGKTAADVARGAGLASSDLEEFLGVLEDGAR
LQ0AAB23YD06FM1.SCF	Esi0220_0059	30	E. siliculosus only	other localisation	1				2 exons, 5' and 3' UTR	0.879544	2.48662	0.0609843	0.699339	0.219842	0.945763	MDMDGFSATIICKDIAPDDGQEEEVVVNGR
CL2673Contig1	Esi0228_0042	76	E. siliculosus only	signal anchor	1				1 exon, 5' and 3' UTR	2.35563	0.473922	2.0379	0.299566	0.488284	0.223713	MTAKAVVGINVSTLVPRFAQRTAVFGGRGAGLHICWDFWIQKCTLVIVGWSLVLLSGPVCWLGTSFAKRRRRYLGM
LQ0ACA22YG07RM1.SCF	Esi0234_0034	31	E. siliculosus only	other localisation	0				2 exons, 3' UTR	2.37129	-0.336114	2.23203	0.127446	0.480151	0.285112	MMAEQLARVAQVSEVMGEQDALLMNTASEEA
LQ0AAA2YO07FM1.SCF	Esi0238_0030	213	E. siliculosus only	other localisation	0				4 exons, 3' UTR	1.97844	-0.0742032	1.44389	0.317795	0.567835	0.123956	MIAGTLQRLAGDKRFICQTAAQAMEAAARNGPGADVLHAILPSLDDRNAEVAAKSAFYAEQCLAALGVGSKAGVGLPEALEFRSMLPGMSRALNGKVAEGRASARRALLRCRKAMGLGPFEAAVKSSLEKAEATSLLTVLATPNRTGAAAGAGKAGPGRAPILQGRRGGAGTGRGGGVAARPSIREQMMAARRKKGQAEGGSGGGGEGFVVVS
CL6817Contig1	Esi0242_0034	190	E. siliculosus only	other localisation	2				3 exons, 5' and 3' UTR	-6.04522	-2.87555	-4.14961	0.226687	1.86471	1.88798	MVTCSYGDSFYLVSEFGTTLDGCYEDSGSTENSLPEYYRDGFKVDGEYSVHASTSFGTSWAIWVLSQYQDYVLGGTLEIRCKDSDENDASLIHPTEVIQWDCEEADNEFTRLDYVTTTCGCTTLSGGSTDDGWSTGEIAGAVVGAIVIILGILAAYFGREYVCRITGTRDNRCDMCCSCPNNSVSGASST
CL3801Contig1	Esi0243_0021	65	E. siliculosus only	other localisation	0				1 exon, 5' and 3' UTR	-1.91743	-0.715523	-0.72748	0.114016	0.270481	0.199969	MDTKKCSAVYIDNPSNRERPTTNAYITNTLRELSLPGSCAVLLLAPRISQESKRAETNKQVLRQA
CL3943Contig1	Esi0244_0032	56	E. siliculosus only	other localisation	0				1 exon, 5' and 3' UTR	3.452	-1.11844	2.68518	0.433277	1.46448	0.741758	MLFGSDVVAVHTNRRFVFFPSVCGVSGGPRWPAACAGGGEAVPTLRDFLLFSGSDR
CL4308Contig1	Esi0245_0029	1225	E. siliculosus only	other localisation	9				7 exons, 3' UTR	2.33959	1.87462	2.82846	0.670863	0.192512	0.383554	MREEMEDALRCLLPLKGRPQQRSSLNRALGLVATSPAHPGLDALLHLASAEGGPALQVVFQLVAADAAKSVPSSPVLRPLGDGRHPAVLKGLLGPADFPWQGGIGPSARDSAVKAARARACDALRHACSELSPSSSSAPAAARDTGNPTGDGGDSAEAGPGGNVTAGSGKLDVEAVAEVFPLVLPLAGTTLEGARCLRAMFAARGGVGEAAQAAVLRRGVVGDAAGAGAGGIGAIVAMLHSTYVEIRAAGASILRKLVFPTAAPTHRPEGGGQAAAASIRPCRALLESLHACGGRSEALRSLSSFGLFGEQDQAAVPGGTLSVIDNGGGGGGGGERAGSRKGSAGGGRRKGAAQEVRWRRQLRDDAAAVLVAVVGAVTGGAGNGSGGGGASWRQRRRRR…
CL6003Contig1	Esi0246_0050	491	E. siliculosus only	other localisation	3	64153			2 exons, 3' UTR	1.56153	0.397605	0.278136	0.141133	0.250827	0.262156	MRSPEDTPGLDPAGATAPSSASELTAPIPWESCVHGQALPRHYLSAPWASHATTVELAKRLVDIAWSALYLGGDDAGGSGPTAAAETLMRALRAATRARGGWREDAGVGIKHAASAAIRRLRFPLFSGAALGHALPLALPLADDYDPAHQAVGFSLLLRLFAEAPPAELGLHRGLLLEVLERGIRCGGRDPSASALCMAAVVRLLRRSPKNGGGGGGGGGGGGERAGIRIARETLAQAARATDGAVKAVMVCGAAALLEVPATGKGYAPCEFLRPALLCLLPILQSPPVSSRLDARAASLRAVRALCLSCWPRVHAHASKLLCSLLWTCGDCTRRASVRRLSSSSPGGGRAKDGPARPQPSLGVVLAANAAAIDPLTDEAVRTYATRLGALVLVLAGDG…
LQ0AAB52YF23FM1.SCF	Esi0247_0026	226	E. siliculosus only	other localisation	1				5 exons, 3' UTR	1.41987	-0.946339	0.944339	0.157709	1.93818	0.455641	MTEETDPLSAVGLSEEEQVRRQFMSPYVEQKDIHFVRSQGEECRMEAVLGDVDIVVDVPLHAFPLTPSHMSLTQDIAAVNDEAELVGVRYYIRLILEDSTQQAYWHTHEIFFHRSEPSPSSQGQGDDDVSSTGGEYDVDDPEAGYRSNGSFNGQQQGNGGGDSESQSRRVRQQEEEAAAKGNEAAAAAAAAGAAGAPAGGAVGVESSMEEGNSVTAPSLPGGETSR
CL2999Contig1	Esi0249_0026	52	E. siliculosus only	other localisation	0				1 exon, 5' and 3' UTR	-2.86466	-1.06211	-1.45631	1.80253	0.412525	0.192781	MYSLHSWSCRTWFGAGREQGRSQASNVHFQRAWRLLDGIPCYCGRKRNHPPE
LQ0AAB8YN04FM1.SCF	Esi0249_0026	52	E. siliculosus only	other localisation	0				1 exon, 5' and 3' UTR	-1.87842	-0.44056	-1.50962	0.368753	0.111541	0.436461	MYSLHSWSCRTWFGAGREQGRSQASNVHFQRAWRLLDGIPCYCGRKRNHPPE
CL902Contig1	Esi0250_0016	66	E. siliculosus only	other localisation	0				1 exon, 5' and 3' UTR	0.0479298	1.9052	-0.133217	0.306689	0.23601	0.55293	MLELLTASSEEFISNASDDVVMMLPLARLLVLEKKAPEGGRLMLLSQFRFTSQNQGNTVVFSGKYM
CL1626Contig1	Esi0251_0018	327	E. siliculosus only	other localisation	6				4 exons, 5' and 3' UTR	1.60321	-2.75505	1.02546	2.30588	0.358402	0.942726	MPTILSCETGFTAIGLQEGEDKITPIRVLSTLVSVSVVSAWCSWTKVKRLSLFFAHWLSGLVWGLCFVVEDMMVTVCWTESDLIGFIKAVKFIEFVSSNMMAITHLAICVNLALIVSSHRTLTRVQSVSSPWLLSLLLAISIGITSVTVPLWETVYVIGTGFWIVNSDQGSYDAVVVSIFFLEFMVGICMFVILAWLLLFRMKEVKECWRIDARIRYYFCLTLLGTAVNIGIGICSTVFVIGDMDEPRLAIWSWVSRYIHVALDTFVLYGVLREKDMDERGGNARSSNYNCNDSANSSGLVVSRRHGKSSPRSGGSSINTTNPTTHV
CL1626Contig2	Esi0251_0018	327	E. siliculosus only	other localisation	6				4 exons, 5' and 3' UTR	0.536885	-5.92042	0.317194	0.310429	0.531922	0.184231	MPTILSCETGFTAIGLQEGEDKITPIRVLSTLVSVSVVSAWCSWTKVKRLSLFFAHWLSGLVWGLCFVVEDMMVTVCWTESDLIGFIKAVKFIEFVSSNMMAITHLAICVNLALIVSSHRTLTRVQSVSSPWLLSLLLAISIGITSVTVPLWETVYVIGTGFWIVNSDQGSYDAVVVSIFFLEFMVGICMFVILAWLLLFRMKEVKECWRIDARIRYYFCLTLLGTAVNIGIGICSTVFVIGDMDEPRLAIWSWVSRYIHVALDTFVLYGVLREKDMDERGGNARSSNYNCNDSANSSGLVVSRRHGKSSPRSGGSSINTTNPTTHV
CL929Contig1	Esi0254_0007	333	E. siliculosus only	chloroplast	4				8 exons, 5' and 3' UTR	-1.54794	-0.781967	0.0812799	0.160293	0.322344	0.0427447	MSPQRACRLLATFMGTAGMASAFLGTPVALSSAASRPTVASSSVRARGRCAPGAVSVSMGLVDAVPDKLKNVFASKPKPTSRRGRTEGAELYRTLGVTPDADYLEVMEACDRLKVKYASDRKQVIRVDKAKDGILSLRLNQAVKGNIKTNEEAQNMDSYLTAKEAYIKQRDSPWQRPTWAKGWVKVPDKVHGKRCATRHGLMALFVLAFPSAGMGVKLIGGMTTFGMTMNRDGPELKRDDNGQVAEVRLPSKLSSAMSFLAVIGSIFVGSAVGGTFSQYIGNRILIRDTWMDLSVAVFPGDGVGVRHNMAGPLFRAFCRQKAGQAGRRWWRLI
CL259Contig1	Esi0255_0014	378	E. siliculosus only	other localisation	0	IPR002068	IPR008978		4 exons, 5' and 3' UTR	-4.00857	2.15338	-0.697319	1.63762	0.220778	0.763455	MAASAEQQSRREGAIKTTPPPPVVAHPPFDLPLVLEECPMCIPDPEVRETDAGYALTFNLPSGISDTGLEVSVSGRLLTVEARTTREENHDVISKSADKGSEGSKGWVMTRCTTKTNAAARSFTLPDSVSNEVTASWGNDNQVVINLTKVAHYDPVNAGGMNNVFSTMEDSGVVPVERRHGDDQHPSASSSAAEYLYGSKLDGASLKPSSILELDLEFRSLVRDMWHGDGSVRFPTEEQVAATVARARKERKKIVKALRRATMATDVSEKELEYVVKFALPQGATRDDVELMVTPDNNGLRVAFFGEGNHMVSKAVCLPSDASFSDISARFTPEPRKRGRGGAAGGGLEGGKKSRNVAGLEVAVGRAAPQLPKSIEIK
LQ0AAB67YJ11FM1.SCF	Esi0255_0035	44	E. siliculosus only	other localisation	0				2 exons, 3' UTR	-0.266459	2.22358	-2.44217	0.758019	0.263517	1.85202	MFYLRIGSIRGLRPNGHILLSPLWNGLDNDDRKRERRGHYSGFG
CL5638Contig1	Esi0259_0026	174	E. siliculosus only	signal anchor	3				1 exon, 3' UTR	2.53263	1.40489	1.17974	0.430078	1.04618	0.84745	MATGRRVEGEAVTTSVSSDAATFSVTRTPLRSKDCHSICDSFETAGGRPRMSHAFTRRRSPHIRALSFAVALAASALGVAGAREADGGAVVPTSCTPPRKARSCCLGGDQVVDRCLKLLAITGSLIALPLQLLPQAVHQPAERSELSLISGGVAAGACPWRSRGGYRSTPRGST
LQ0AAB35YO06FM1.SCF	Esi0261_0039	738	E. siliculosus only	other localisation	3				8 exons, 5' and 3' UTR	3.11667	1.62426	2.05243	0.256123	0.48372	0.871635	MDATRRAVLSGTAISHAFDNLLRPLADNLIWMARNKLAKRALTNNYLKKLLLDAYLAFEALTDHPYGFFSFIDGFFPLLSSFDGCAKLAVNICIEKYLQQRMKQVIDMDLDAIWLVISMLSPMVFGMRLQFSQNTPLTFCPQNRKSNIIVVPARGHAPRSGDAQAADGQKLMERVRENEDGLGLSEILEGMSLDGLKGLYRLCFGPRAPGISRYPNRVLLIELFKTVEKLWRENNHGKEDCSKFFMERGAWLVSSGVEGGYSPDGVQTCHMFMLRAESPTDLAVLLLHHVHMPILVITDIMCRVGPIVHDRCQTAAPNEGVLPRVGEPDEHGMRKVDIPALAPLGNYFLGADQVSEPVPQEKCTQRNVYNLLRDAQTSPPVQRLDFGQLLSVSAWQDRE…
LQ0AAB34YN16FM1.SCF	Esi0261_0042	84	E. siliculosus only	other localisation	0				2 exons, 3' UTR	-4.33631	-1.65417	-2.53175	0.316422	1.55998	1.16121	MFWLSAPFLVSEREPHCVLERGLQFTKALRGLLEPRGWIEINWVSMTRKWGVDILDGMHHGEPATRMLAYLLMHHVCHASDSDR
LQ0AFA3YG14RM1.SCF	Esi0262_0005	112	E. siliculosus only	other localisation	1				3 exons, 5' and 3' UTR	2.36345	1.88871	2.75711	0.304955	1.20764	0.372762	MDFLLRCHIRGKSSSGDGGGGVSFDVNPDKAVFGNGIVGFDTHDEDDQDSDVTVTAVAAAAFAGGWFCALLAMITIACWSELSVVAQRGPDGGEGPWRTSFSAWLVGVFVEP
CL5903Contig1	Esi0264_0003	62	E. siliculosus only	mitochondrion	1				2 exons, 5' and 3' UTR	2.10683	-1.6606	1.26531	0.338403	1.0099	0.956313	MFADTMNGCVSLCDTPVVIVLFRIASIGKTMRGFVPRLLRSVLPRATSICLCCSTESEKEGR
CL1661Contig1	Esi0264_0022	299	E. siliculosus only	other localisation	1	PF02205	PF00397	IPR001202	5 exons, 5' and 3' UTR	2.21213	0.209208	1.29457	0.289278	0.400965	0.173789	MSLAPGWTAYKAADGKEYFHNATTNQTTWDRPTAAPAIPKAAPPLPSKPSGGGFFGGAKKSAGKPAGGGGATASPPPDLLASIRGGASLKKAETVDKSIARGAGTVSGGGDGGGGPASSYSAPAPAPTSGGGGGGMMGELANAMARRKSSGPGRGGPPAVPYSAPAPAGGPGGRSPPPSMPAPMPGRGMGGMPMPGGRGGAGAPGIPAKAPPPIPSKATNGASSWGGPSAASSAPAPAAGAGGGYGSNGAGYGGNGVGYGGNGVGASSSSSARGGVSESDRLAAIEAKLDKIMQHLRIA
CL820Contig1	Esi0264_0023	80	E. siliculosus only	other localisation	0	PF05160			3 exons, 5' and 3' UTR	1.05956	-0.51777	0.351583	0.111343	0.336419	0.260005	MSDVKVEEKVPVAEVLEEDDEFEEFAEANWDETAEDQEDLQQWQDDWDDDDMDDDFCNQLRAELEKTKPPATGQAKPQQS
LQ0AAB66YP24RM1.SCF	Esi0264_0024	421	E. siliculosus only	other localisation	1	PF00348	IPR008949	IPR000092	8 exons, 5' and 3' UTR	1.78091	-1.11001	1.24746	0.19776	0.232056	0.413845	MDAPTDNTTAGSPTRGHEVDQDIMEPFHYINQVPGKDVRGKLIDAFQIWLDIPAERIDAIKEVVGMLHNASLLVDDIEDNSKLRRGVPVAHSIYGVASTINTANYVYFQASRLSEISCCALQSALTKVRAAIKSCWHARHSKINCTVFFDRHVVRSSFPNTNSVCRSPVGFVLDEHEECVSTCLLSFRTLTQALERTHALGNSRALETFVHEQLNLHRGQGRDILWRDSNRCPTEEEYESMVLDKTGGLFRLAVGLMQAFSQDQRNYTPLLDQLALYFQIRDDLINLSSPEYMKGKSFCEDLTEGKFSFPIIHCVRAKPNDHRLLNILKQRTEDVDVKKHAVVWMKQAGSFVYTRHRLVSLKESIAEGIQLLGGHLGLSRLIEGLDRQLEGLDLAEPSS…
LQ0AAA12YK03FM1.SCF	Esi0266_0006	157	E. siliculosus only	other localisation	2				4 exons, 5' and 3' UTR	3.63977	-0.697451	3.29696	0.527101	0.48037	0.291759	MCVPVIGPEVSMVCDAGSASRPTRLSRDESSRGGKIPPPKDGVREIASRPTTAAGSSGSRGGGRVVGLLALAFALPIKLCNVESKMLVELPSGFRCIWNDLPHIVQFVAIFMMLVLLYGVNRAFDKADDAMSTRLSRATAALLHERRHHHAPRPRVL
CL7325Contig1	Esi0266_0008	91	E. siliculosus only	signal peptide	2				1 exon, 5' and 3' UTR	1.69054	1.63314	0.471974	0.1229	0.167211	0.255755	MIGYFLLGRTVLSIFPPVGISCAACYSNGCGKRTHRSAFVDALFFFFFCSKGMGGGVKRCREPFLTAGVVTVSGSRRFAVFSAPVMKHQRS
CL7142Contig1	Esi0270_0013	140	E. siliculosus only	signal anchor	1				3 exons, 5' and 3' UTR	-5.23598	1.70581	-1.08883	0.252892	0.237687	1.46752	MAYRGAREREWFTIPKESPEDKRRSRALLTIQSVGVISAALSFGTLALYWLAGAAFVHLGPREYPGSMSSRGGASTAPGIERIAAGEDGNGGAQQAPQTKRRAMGGSSTREAFQFEGFPDVGGSGGGSGGVGKGVVPPDF
CL7679Contig1	Esi0272_0023	115	E. siliculosus only	other localisation	0				4 exons, no UTR	1.19419	0.898585	0.737767	0.196213	0.230212	0.11384	MTSGQRSRAVTTAAVALTRQVKQVQQVDEDLCYDDVEAPTPPLEDAVRVRPSAAATAGYSPKTKQQAMASAATAPIDDAPPTYDELEADAPSPAGGRVPAKMLVTVDLGPEGRRR
LQ0AAB5YH06FM1.SCF	Esi0274_0024	109	E. siliculosus only	other localisation	1	IPR011043	PF01344		2 exons, 3' UTR	-7.03887	0.271942	-3.33752	0.146168	0.959304	2.465	MFVFCVFLYLDKEGGSSDGSHGLSSVETLDPREGKWSASPRMVFGRAFCCASFGASGCLYVVGGTSLATGVMRTVEVFDPRSEKWRVEERFGAGDGGRAVTDASLVFQP
CL7252Contig1	Esi0278_0021	52	E. siliculosus only	other localisation	0				1 exon, 5' and 3' UTR	3.69414	2.15674	5.32966	1.59316	1.37341	0.569725	MTDFIERKSTADDSSNECGDLGEELRGNTPRERERESSTSDVDIDWKSSERE
CL5647Contig1	Esi0279_0035	349	E. siliculosus only	signal peptide	1	PF09258	53448	PTHR11062	2 exons, 5' and 3' UTR	3.28073	0.259096	1.8636	0.550164	1.04527	1.52804	MGMVLRSKSNTSLPTHQYTRVSVEPQHATRQAQLPPSGRFLSSSSSSSVLGSLLKRAVLVVGVVAPVVFILIWRHLFSIDAGAVLAENGGSGSSIENTFTVRMNTFRRNDLLKRSAEHLASCDCVGQIQVVWSDQENAPPSMDLFTERTRRKVVFEVHDTNSLSHRFNVTSTLGTDGVFSTDDDLEISCADLKFGFETWRASQNTMVGFSPRLVTRNPGTGRHSYRSWRVVRWNGVYNVILTKCCFLHRDHLRTYVDEMTAPLLAYIDEHRNCEDIAMSVVVAKFHKTPPVWVGGRVKEIGGDGISGLAHHFDARSNCVDFFAEEFGDMPLLESSVKVYPMHTGLLSWL
LQ0AAB21YC15FM1.SCF	Esi0281_0047	33	E. siliculosus only	other localisation	0				2 exons, 3' UTR	2.08391	-0.816019	0.28933	0.414182	0.505449	0.379209	MKSSEFSIVRHGESIVTGITERPYNCLFGGDDL
CL1566Contig1	Esi0289_0016	487	E. siliculosus only	other localisation	1				1 exon, 3' UTR	1.6683	0.53845	-0.0617549	0.267018	0.357005	0.223971	MKALIAFLGARKEHLASLNHVLPSLLGMADSDKDEWVQVVSGLVRQKLLPRDEDDSTSVGDEAKTSQSDFVLRKTVREVLERAKQNMSERAGNGKQRVVGGSTIGGNRDTRRMREAPYFGPLEERYVSRKQQPRKQEFANAHFSVKYDFVGEFSEDLASNVGGTSNTSSSPTGGGASVAAAALASRVGQGGLLKTPGSFAPAPTPAAPNLAQARRVSLAAVVDPSAGSDGLRRTSKPLALSRNYVGLQHGSGRTSSGVGGARGTRGGGGASPGKAGLMMINVDELQAIHAEKQSAREKAKGKPGRKKAKLEGGGEQSTAGMEPGTGASATGTQQVVANATDVGNTDGQLPEGASGEGKKAKPKAPAKPSATADGPMPVPQQGEIEAVAAMMVLGVAGGG…
CL4227Contig1	Esi0291_0031	135	E. siliculosus only	signal anchor	2	IPR010742	PD219741		3 exons, 5' and 3' UTR	-0.0650394	-1.54172	0.262099	0.412654	0.170923	0.206024	MSNRSRRTVVAEAEPTFVQSCSTKWSKGLQRGARWDKDTFEDFPVCVHWFRQFMAAVAGICVGVAGVTGWFGLVGGFAFVTGATYLYYARFVEADELSYGDQGLKWEGLLPSLTVFLLMWILSFNGMDHVLLNVA
CL718Contig1	Esi0293_0014	378	E. siliculosus only	other localisation	4				3 exons, no UTR	0.5123	-0.842324	2.72652	0.468145	0.637468	0.435698	MGGPSRNNDPNWTPQLSAFTSGDAHNGCRALFNGTAGWAYFGPAGEIDEGALPAGTVSYPYNVKGDKSGLFGVTASGSGGGGGGGGGGASQAAKKPGDDLNRKSNEMRGVYFDAKDLAHLVRGWAGDDGDDGDDDDAVQYGGGCSERGGGGEEEEGRPRKGRPIVLTLQAILAATTPTAAAAVVAADAVAAFPLNAKAAAAAAAEEETATDKDGNNYTGAAAAMPAAAAAVAGVTAADNNAQFPPLMLRDASAEKGPGLYLAPPITMVKKNGPGHPAEQLAASHEAAAVGTQGCAVSCSEAAAATSVAEATVLAAAAAAAADETAADGAAATAATTGGGGGRAADRAKSMLEDEDPYYARKRVGAFAHRTKPRGKAHK
CL1001Contig1	Esi0300_0012	442	E. siliculosus only	signal peptide	10	PS50286			13 exons, 5' and 3' UTR+J423	-6.82165	-1.09794	-2.91894	0.293777	0.67284	0.601035	MGSGFLALPAAFVATGMFLGVAVLFACMGLLRMTAMYEVETMCRAEAWMKANLVPLVHKQRAREGAESEMHLSSHAFQMTEMCDLFGGRMLQRAFNFVLFLYMFCALWGYGAVFGEALATYAPVPFLGPAGAYRMYVVLFGMVVVPMSTLEIKEQAMFQVVLTILRFMALVVMVGTILASLYTGGEPFGPGTEEFVGTTPLATWRGIFKAVPAGIFALSLAATTPTIVSGLDQKHSVGNVVWAAMISATITYTGISLATAYYFGSSVHGSCNVSWANYSPKGDGPVASLLATSGRMMAYFVVLFPAMDVTSVYPLNVMVVANNMMAAVYNDHVDNAENDSVIVTTFRILCAVPPLLCALLWKDFAAIVGYAGCLTVMIAFVFPAYVNLLSKRMCEERFG…
CL953Contig1	Esi0311_0009	250	E. siliculosus only	signal peptide	0				2 exons, 5' and 3' UTR	-2.46041	0.210529	-1.33848	0.948484	0.195406	0.197769	MTPLFSLAAAALLPWGHNAFVIVPAATSLGGRGGNVARPESRIRANPTAEALQQREDARAALLESGGVDELLRKIAIMRGEEIEEGAAAAPAAAAAPPVAKKPEKKAPEPVAAAPAPAKPAPVEKKPAPAPPAPAKKEPAPVAAAAAAPVEKKTAPAPPAPAKTEPAPVAAAAAAPVEKKPAPAAAAAPAPVKKEAAPVAAAAAAPVSESKPAAAAAPAAPAAPEAAAPTTPQKKSRKQQKKKRGKKAKA
LQ0AFA5YC20RM1.SCF	Esi0313_0024	98	E. siliculosus only	other localisation	0				1 exon, 5' and 3' UTR	3.0096	5.13536	2.13388	1.8005	0.727007	1.65958	MRAKDKPTATSQPPPPPPLTIEAAGQKYAQTTEFRYLGGLVNEHGDLTREISYRSRGAWACLRRYGQELFDRPKAPFRLKIRLLQAEAMEALLYGCMT
CL7240Contig1	Esi0314_0020	246	E. siliculosus only	other localisation	1				4 exons, 3' UTR	0.0332266	-1.63221	0.308884	0.517682	0.253701	0.298521	MPPSFRRSAGSSAGTDKKSISAATAPISGDDGVGDSATAAVAASFSAEGSSEGGGVSADGGSGSGRHSTSSGSKGAKAKEGSASGGTDAAAPAAGDGEDAAKAPEDGKAAAAAAAAAAAAAAPAASQWGGKKSFLDVVKAPGSLPPPIAAAPSATKQPPSSSSMMGNKAKGGGRIKSPLRGRPEPPSGESRDMKRSGGRGERDGHRGDGHHHKGSMGAAGGGGKDSARLPNGRSGGGGSREKGAWA
LQ0AAB37YM03FM1.SCF	Esi0322_0026	49	E. siliculosus only	other localisation	0				1 exon, 5' and 3' UTR	2.75726	-0.317265	0.797448	0.439033	0.961085	0.594319	MSVGSGTTPSPRPRSVSTTYKWSSAQVPCGSRRLSFTRLVDAGIALSVR
LQ0ADA17YJ22RM1.SCF	Esi0326_0012	79	E. siliculosus only	other localisation	0				1 exon, 3' UTR	-1.44316	1.15262	0.281271	0.762332	0.026712	0.316283	MMRQVCSDCPRDLMPFHVKPIPDPICETAESLRGDAQVGEVWNGELCPDWCMKQAPVSQLATQSGPVDVRECSLKTDQP
LQ0AAA1YC03FM1.SCF	Esi0332_0023	101	E. siliculosus only	other localisation	0				1 exon, 3' UTR	7.16728	6.01188	3.99741	0.396859	1.08603	0.354657	MPGGTHHRRRSHGHQGTDAAANTSAENETSGRAAGGPQVAQAATLVVPDLGVGGVSGSSDVVPAAAAAESSGSGRGRGSSAPADLENAAAGAGGRKANRSE
CL1570Contig1	Esi0333_0020	53	E. siliculosus only	other localisation	0				1 exon, 3' UTR	-1.33744	5.21245	0.920515	2.09778	0.298025	1.45143	MSCFPARQRDAIPWSTSMHPRFSPTNTPTHPMWKAFLHPGSGSRIAFCTWFRG
LQ0AAA5YP18FM1.SCF	Esi0340_0026	1194	E. siliculosus only	other localisation	4				5 exons, 3' UTR	-1.16104	-2.33175	-0.522197	1.06471	0.292284	0.801035	MKRGSSLGTNDGGRASTKRKRKSSDRSSADTALPSGSSASKAQRRTDGAGGPPPHGGKGCRPIQTCRAQGLPSPCLTTRSFGFPGGLRMFCQRHQSEGMVNLALLSKLKSIQQKKAAAAAAAAPAPAPAPAAETKVVNVRRQPTLCPRTKGQRRSSMVGRGRSSQPALKKARHHAPGSTRLKKKSSGARGARSSGAVAIDGHGRGEAAAAAAAAAAAAAAAAAAGATFAPDADGKPAVRVARSAVASRKPTSPGDANGAGGSISHKPVCAEQGCTAPSRFGWVTSRRRQYCGTHKRFGMVNLDRGTRGKRAAPAPSPARKSGRRRRRVVMAGEDRGTSETTTVVSGDPVPPEKVADGGNGGSNNSGGSGSGVGGTGSGGGTSGGGEESSLAAGAVACSG…
CL4820Contig1	Esi0348_0007	55	E. siliculosus only	other localisation	0				1 exon, 5' and 3' UTR	4.00064	0.540341	1.02286	0.652312	0.909232	0.196666	MARESVLHHRVYLRNGGRVLGVQERRGTSRGEMQQQQPTGHEVVTSAVSRGYVSL
CL5639Contig1	Esi0349_0023	38	E. siliculosus only	other localisation	0				2 exons, 5' and 3' UTR	1.02266	1.12018	0.882298	0.287659	0.142259	0.275433	MNVIGRQCCRHAPSIGHDHVGAANTAAAPPSKRRLERE
CL6223Contig1	Esi0362_0013	91	E. siliculosus only	other localisation	0				2 exons, 5' and 3' UTR	-0.310713	-0.0836968	-1.69115	1.02121	0.343811	0.198898	MVMVGSASIQIAPRSPPSVWNGNNNNISARQRQREHGSNSKISDSCTPTARADREGKSVDGFVSRAFPSCTGRLSSRSTGPCQVYGTIRPN
CL64Contig1	Esi0366_0002	54	E. siliculosus only	other localisation	1				2 exons, 5' and 3' UTR	5.24582	2.84996	4.74415	0.53904	1.9848	0.916118	MHFPITHAAALYSVGLVNAISGDDSLREHIIVDAFGYIYPSVRGTDQVRASSPE
CL1481Contig1	Esi0366_0004	268	E. siliculosus only	other localisation	1				2 exons, 5' and 3' UTR	4.65651	3.43871	4.23593	0.607359	1.64203	0.72667	MTSVHKPDLSGLPTFNVAGGRPDERFGTRGSFTRGVRIMSGGHARDVPLEAEVDHGKVLFVSAIHKPDLSTEARTNAVRPMERLGARGRFTPGGRRWAGGKPRDVPLEAEVDHGKVLLVSAVHKPDLSAEARINATRPTERLGSRGRFTAGVRRWGGGEPRDVPLPRVRDPGTVLFESASERSRPSLSFSGETNVSGGREDERHGRLGSFEHGVVEARGGPLQVQAAFASEVEQLWHEGGQKENKYRRCGPSHFVAGVSILSGGMPVY
CL3252Contig1	Esi0381_0004	74	E. siliculosus only	other localisation	0				2 exons, 3' UTR	-4.5048	-1.14896	-1.24698	1.73961	0.270749	0.191612	MQYEKSDVDDQMDLLRAQAKGQEFDEAKAQDKIEAQLEREMVLDWIDDRSEITWLPAKPVEKVDLEELGVVNSP
LQ0AAB27YM03FM1.SCF	Esi0387_0023	188	E. siliculosus only	other localisation	0				1 exon, 3' UTR	5.19855	3.09808	2.22059	0.761992	1.90412	0.408816	MGGARAGGTAGPGAGVAPGARGGGVGGVGGGATTGGSNSNAVKANQLKALLGLGTSAADAADGADAATGAGSNGVVGGGSRGAAGAVPSDAPPPPPPPPPPAARGHFIFSGADNDGNPGMRRGDDMLLPPQQQQQQQQQQQPNMGEGAGGARAGGVAAEGGRSSSGKGESGQTEDPSRVLKQLLGLKL
CL693Contig1	Esi0398_0020	281	E. siliculosus only	other localisation	0				2 exons, 5' and 3' UTR	3.41384	2.08554	2.1092	0.122438	0.433764	0.38294	MCNTAVLAKMRQVNNNKPSCFRRQRSAAVPHHQEHRRTKREREAQRTAGRPAKRVSFSANECVLGRAQDYDRTSCEVQTPLVRRRIIPKRPAPVVIIPSDEEAKQQQDQEPHEQQHANFCGMWRRSHGFHWESLLEFSGVDKADVAEQAARMQSSSVVHLIDHDANSFRLVVHSDSGNTQDQHFFIGGQPRPSPTNAPSTATLSNMRWTKNGQGLVLTSVDAATGDEMTVSRHLAAQGSVIVQHYAARRAKTGETAEAVTIFRRMVRATSSSTSEPPISPP
LQ0ACA6YB07RM1.SCF	Esi0425_0021	371	E. siliculosus only	other localisation	1				1 exon, 3' UTR	-0.284847	2.56034	0.583684	2.614	0.351646	1.05762	MFCQRACGGGDDNPGDGTIGGGGGGGGGGGGDSSGGNGSNGGSGGGGGGLARPRRHHPRASFRPRRGALCLAALRASPPAARGGPAAVAWGPRWRARACGRLLPAAVSRLHTTVALSQGFQGEEARGVGGSREIGWRGQSLLTATGPLRAAAATAAATAAAAVTLSSPGPTGVQMDKARELGLAPHFLLRLMRSAGKMPAASAGGHHAAQQTGASPIDAGPATGPFPLTLMLDHRTDNGGTSSSWVAPAAPGRTRSTSATAGRRARGDRADAASAWPRGSYQTAAPLKETGRHHHRLPPLMENIRRAIPLGCFPAGTSSRWGTFSGAWCRLARRASVRPRPPCNARSRWWRWSASGATAPGRRARCARRRG
LQ0AAB21YL02FM1.SCF	Esi0432_0020	102	E. siliculosus only	other localisation	1				1 exon, 3' UTR	-3.11655	-1.54751	-0.946747	0.613051	0.637123	0.363834	MATRRAAIQTAQETASLGVSTVVESIATGITEIDAAAPVVALCVAVLKAKGIVEGASRNKEELDVRTMMLVREVVPLLLGESLGRNRPDPFLRTSAHRAVTS
LQ0ACA20YM10RM1.SCF	Esi0453_0015	75	E. siliculosus only	other localisation	0				1 exon, 3' UTR	-2.50139	-2.45524	-1.22349	0.740919	0.230404	0.0637574	MMVSIGKIEGCPFWRRLPLPNASLYTRGRLVGTHRDVVFRQVGEVVRAWRDGVNAAAEWWPLNTSKVVPSMFSVD
LQ0AAB80YN05RM1.SCF	Esi0457_0018	44	E. siliculosus only	other localisation	0				2 exons, 3' UTR	-6.36884	-1.1531	-1.71495	0.868627	1.74973	0.61051	MAKTTPSPQPGLSSCWTASRDRRPWDCREDIFAISPARRHSRRW
LQ0AAA1YK22RM1.SCF	Esi0474_0003	124	E. siliculosus only	other localisation	1				1 exon, 3' UTR	-0.243622	1.42089	-0.892999	0.629236	0.148286	0.307421	MQKLDFPEFGRNLEEFMAKKGTPVKRVVMDGHGLSHVQVPVPGKDYPEVNPHLVTGDEDEEEALHEGFDAMSLLPGAHVGGAGYLPGVPPPPPPLRQEVGGAGDGEDVVDGDWEEDVVDGPPDV
LQ0AAB50YM12FM1.SCF	Esi0485_0002	50	E. siliculosus only	other localisation	0				1 exon, 5' and 3' UTR	3.22508	-1.7376	-0.022736	0.217184	0.730847	1.36432	MCFLGSAVISFARGRHWGAGGDQLQQEKQVLQPSRQIALPRKLHSTCEGL
CL5936Contig1	Esi0488_0012	91	E. siliculosus only	other localisation	0				2 exons, 5' and 3' UTR	1.18318	0.399053	1.73172	0.911644	0.315824	0.309115	MLPTAQPAPAMDSSVNTEVKVEPTGVVKQFEDLIETVISTIQEPEVTEAGVAAVMARLQAYSDGINRLVETLPPEAANGNERGVGVGRAGV
LQ0AAB48YK12FM1.SCF	Esi0488_0012	91	E. siliculosus only	other localisation	0				2 exons, 5' and 3' UTR	2.73011	0.799733	3.04455	0.270737	0.943583	0.97421	MLPTAQPAPAMDSSVNTEVKVEPTGVVKQFEDLIETVISTIQEPEVTEAGVAAVMARLQAYSDGINRLVETLPPEAANGNERGVGVGRAGV
LQ0ADA19YJ04RM1.SCF	Esi0521_0009	186	E. siliculosus only	other localisation	2				1 exon, 3' UTR	0.37905	2.74133	0.237586	0.688367	0.148262	0.238423	MPQTLSAPNFRGRRMAQCSRAQLHRCSRLRKASIAGGGPLESGPSGIVAAAAAAAARAAATARESTAQGGGASGAGAADSASGVAVASSGAGGTGSDSGAPVTIHPAPAARGLARGGGGRQQQRRPQICVECRHCSFAAAFARNHRARRLGGGCTVSEDRRRPDSDRTGRRSAGGPKKQFWPIPVR
CL7420Contig1	Esi0534_0005	202	E. siliculosus only	no N-terminal target peptide	2				2 exons, 3' UTR	-2.03072	0.194002	-0.600585	0.330411	0.22054	0.417264	MEAHFTYSVDSSDEADEDSTVMAASAAAECAISTTCDSSRGAECARQVSDADDNNASCARHVSDSSSSSCSSISNGSSGSGSSGGGSGVIGGVGAERYAFEGDDDGIIGTAADPFVDLDTAPAAGLSFSLPAAHRWGGGGGGGGGVVVPPQPLVAATGPHAGGSWQPAAAGAPRVSVRISGGGGGGGGGVGMSRERCMTVXX
CL6741Contig1	Esi0536_0015	81	E. siliculosus only	other localisation	2				2 exons, 5' and 3' UTR	-6.31055	-1.18034	-2.84458	0.614542	1.35283	2.33371	MASEDRGMPELGVEDVLPPVSIESGQVTHVPVANIDLLIGPSVSVVAGGMFGGGGGSVNPGLVMIICISIQYEVLIIVSRV
LQ0AAA14YG10FM1.SCF	Esi0536_0015	81	E. siliculosus only	other localisation	2				2 exons, 5' and 3' UTR	-4.20173	-0.362107	-2.05508	0.384545	0.35964	0.919802	MASEDRGMPELGVEDVLPPVSIESGQVTHVPVANIDLLIGPSVSVVAGGMFGGGGGSVNPGLVMIICISIQYEVLIIVSRV
LQ0AAB49YH04FM1.SCF	Esi0623_0001	81	E. siliculosus only	signal anchor	1				5 exons, 5' and 3' UTR	-0.579203	-1.46043	2.81506	2.26725	0.622576	0.446979	MSRLLGVPKAFQVAFRAEAPPSRGSKIRKTLRVLFTWPDREKRLTVASALGVYKIPAIAGVLVLTGVLGTCFGPWVLDALG
LQ0AAB88YA23FM1.SCF	Esi0623_0001	81	E. siliculosus only	signal anchor	1				5 exons, 5' and 3' UTR	-1.33609	-1.46843	1.755	2.97161	0.26566	0.213831	MSRLLGVPKAFQVAFRAEAPPSRGSKIRKTLRVLFTWPDREKRLTVASALGVYKIPAIAGVLVLTGVLGTCFGPWVLDALG
CL1125Contig2	Esi1051_0001	67	E. siliculosus only	other localisation	1				2 exons, 5' and 3' UTR	2.01315	3.19931	1.84169	0.924423	0.356755	0.1075	MEAGHVSFFGGACKPCGHHNSSRSAWQQRKYIAVMGENYIVLANSAVAEVPILVSQTGLGVNGNGRC
CL3280Contig1	Esi1123_0001	69	E. siliculosus only	other localisation	1				1 exon, 5' and 3' UTR	3.13415	-1.23645	0.867048	0.447701	1.10616	1.08828	MTSDPSLLNRTHLLGSKGGRGTAAAPSPHAFVHSPQVHMDVVVALMAQTVFVFHSTSPSSRWAFFLTAL
CL5743Contig1	Esi1709_0001	50	E. siliculosus only	signal peptide	1				1 exon, 5' and 3' UTR	-0.646473	1.61939	0.0765936	0.264737	0.231588	0.0801276	MAVVVLFLRTVCSTLVFPLCWDNILYGSYRYVFLVVLDIRRRWLGVRRAG
CL6348Contig1	Esi0162_0026	221	hits only with arabidopsis and bacteria	other localisation	0	56281	IPR006034		5 exons, 5' and 3' UTR	-0.126779	-2.67346	0.0191959	0.406388	0.456934	0.162628	MGNTPYLIVRPGKGNIMIDVPRYLEQTADQVAALGDVKYMIVTARDNADGHERWKKKFPGMIRILHRLDLVRKTRIMEERLDGKGPWYLVEDGFESPEDGYVTGDTARFDFFEVADEDCAPHDPTVKIVGIPGQTRGSIGVIVEWGKRKRGGKERLGFTGGTVGMSVEKEEGITWLMPGRGARVMYRTRKEGKADLEKAAGRTEALPNLAGNRLLFGTEFL
CL408Contig2	Esi0486_0003	239	hits with several species	other localisation	2				4 exons, 5' and 3' UTR	-1.99983	0.245294	-1.45758	0.295217	0.0640147	0.945043	MRLSASVALGVGCVSVVQVSSFAFVPLGATPSGCTSCTAHSSQATSGSGSSSRVRPGRLLVALSAADGEGGSDSGEETADDDTSSAVATKPKRKVNPELDDLVSEMAGRSDDEPIVIPRGAGIAPMAPGPIKPDPIPGMDDDDIPGKIVLPPEVLAEQQKGLEKIAQQLRRERLDKEAEDAITFGFCPRAELWNGRSAMFGITVGMLTEYWTGQSIPQQIETFAQLLGLLPLDYDTYFQ
CL3759Contig1	Esi0029_0039	801	hits with several species	other localisation	2	IPR011046	IPR001680		9 exons, 3' UTR	0.417783	-2.62532	0.167614	0.442394	0.364939	0.273457	MGDGEHRMAVNLSKLQVWTPQAVHALATRPDSKVVAVGREDGDVELTVPSEGYRVEARVPGQKNKGLRSLAWIGGTGGDGGVEGDDEGSTAIARLFGCGLDGTVFEVDLLRLCYKNVRDAYGGAAWCMRPAAPLGLLAVGCEDGSVRLFSTEGGGVEYKRSFPSTGSRVLCLAWGPANDVIFAGCLDSMIHCLDATTGQTLFDMRLERGRKEDAIVWALEALSDGTVVSGDSCGRVQVWDGLTGTQLQSLTTHEADVLCLCVAEGETELFASGCDGKVVSMEKRQAVSALPSDMEDAMDDGQTPARMRQGWEWTVGSMRREHTHDVKALAIHEQSLDERTKGGGVGVARKGPGPRPMEPLPPVPVAFLARDPRLVLIMHNLSLDLWEVPRHKRSFSAED…
LQ0AAB30YL22FM1.SCF	Esi0053_0007	259	hits only with diatoms and green lineage	chloroplast	5	PF01169	IPR001727		1 exon, 5' UTR	-2.83181	-2.27208	-1.014	0.427355	0.321124	0.380836	MKASAIGLACFAGIAHVSGFVPHVIPRGSRASHDVSSLVVASRPLPRPYRPTAGRANSSLFMNKGGAHLGEDGERNRTRHLSSLMGHPGGLHKVALLALAGAVSCQLLPHAAVAATETAVPIASAAVDGTLVERLTSSGFFQAFSLVFVSEIGDKTFFIAALLAAKTSRLISFAGSVGALAVMTVLAVLLGLAFHSVPSVFTSGLPLDDIIAAAAFLYFGINTLKDAYALPDDSNQGIEEERAEAEESVKELEGKKTVW
LQ0AAB14YM15FM1.SCF	Esi0080_0098	279	hits only with diatoms and green lineage	other localisation	1	PF07082			5 exons, 3' UTR	-4.52552	0.485344	-1.22949	0.56903	0.5629	0.831611	MTFQECPRWVCDGILDRFEQAAVPLAAQYGALPVVGIGHSCGALLQLLITCLFPDTPRAANALISFNNKPVSEAVPGFEELVLPLVMQVLKEGGGQSTLFSTLEMLRETVDNLVDGQVLGIADGTREFTPTPEETRDVVSKMYRARRTIMIRFENDSLDESEGMKDVIQEGKTLLRMRRPLVDMELRYEIIKGNHITPLTQNVFLKTPVDSIDPLFGVRQGMKKEFLKTVNHLGQILVDWLEESAPPVPPGSGGGGGGGSGGIPEGVGEMPSTEASGRM
CL4301Contig1	Esi0147_0021	339	hits only with diatoms and green lineage	signal peptide	7	103481	PF00892		5 exons, no UTR	-5.40452	-0.562764	-1.69993	0.546847	0.628284	0.64461	MEVGVWVALGYFTQAIGLETSDASVCAFLCSLTVVVVPLLDAVTGKGIKRVTVAASLLALVGTGFLELGDAHASWNDLWCVAQAVGFGVAFTRIEHYMEKFPGKSLQLSIGQLISVAALTGIWCTFSAGGHLPDFSFVKDPQILAALSYTGLVTTSLAIWLETVCLEKVPAAEMSVIFSTEPLWATLVSVLFLKETMGPNALVGAGVILLACLVAQSEQISELVGMGGGKGNDTLMDAEATDAEEGAEEPFQLQETEEVNEDDFPSSVLDEMVGVTEESDPESSFRMSMVQESTVPGGVYGGDPAFAGEEGTLRNNDNDVPAAAPVGWFGSYGKHKEMT
CL1036Contig1	Esi0080_0015	175	htis only with fungi and bacteria	other localisation	1	56784			4 exons, 5' and 3' UTR	-6.75328	-0.978728	-3.09318	2.03392	0.236886	0.170192	MTTKTGMVDTLDELKARKVPFAIATTSPKPRVPASVHACGLDDYFPADKIHSGESDFDPPRFKPDPSVYLRAAQYEGVIPPICVAVEDSASGVGSAFAAEMGLIVGYVGASHISEERKTEHAKMLRVRGARVVVDNMRDLIPLVDCFTECMAKGEDFCLPIANVIKNMDRKTVWE
CL1778Contig1	Esi0130_0062	344	hits only with green lineage	other localisation	3	53474	PS50187		10 exons, 5' and 3' UTR	-2.40602	1.78987	-0.160977	0.443362	0.281314	0.400099	MGKADAKDADVALRSVKVGPLKQENIELPSGVSMQTLSQKPSTGSPKRSKPPPPLVFIHGSYHAAWCWAEHWMPFLAAKGYETYSISLRGTSGTLIPGAEPDAKGIKVKISDHVDDIRSFAETFLPGRRPVFVSHSFGGVVLLKLLEELATEGGQGEKENKDKEGADGIRPAVAGGAFLCSVPPSGNGPMTKRFIKQRPVMAVKIVLGFVLKMAVYWPWLARDLFFCQALEQSALKRYMSRFKADSKNGLDLMDFSGQLPMKMANADGQATWVNQAPPRLVIGAERDRIVDEAGVQEMAAFLDTDYVMLPTVPHEVMLGPDWPLGVARLLQWLETTDFAMSSKP
CL3604Contig1	Esi0098_0014	407	hits with several species	chloroplast	6	PF07884	IPR012932	IPR012336	8 exons, 5' and 3' UTR	-2.0881	-0.416669	-0.966902	0.441188	0.0504664	0.462243	MRSPPCSPALLRFVALVLATLTVVPGSIAFVVTSSGRPSLKTQPRCGGSSVMFSRARRPSRNANRRPVGGSSVGGSVRGGATATRLIMGAGITSEDGDGEESSDYSAWPAINRKAIGALASVGALESAYLTYQKIHPAGLDLLCGASGGCLDVLNGPYSNVLGVPLSAFGTLGYLAAAGLAVVPLFAKEESASVDKTTRSLLLVVTTAMGVFSLYLLSLLKFKIGYPCPWCLTSAGLSLSMCVVAWMKRAVPEKTKAAVVGACTTLITAFACLTVFVVTETALDIRQAEASPGELVGVQLVAPPLIDTESSPQALRIGKKLKSLDAKMYGAYWCTHCFNQKEMLGKQVMSKVKYIECSNRGVDNQVDMCKAADIPGFPTWDIDGKLYPGEQTLEELEEI…
CL5956Contig1	Esi0004_0085	225	hits with several species	other localisation	2				6 exons, 5' and 3' UTR	-3.63541	1.03504	-0.876162	0.665483	0.923385	0.748055	MYRTDGKDYPKSLGSSAKVGFTSVDPWLCFSPCKNNIADAAKAQVSGTPPAAAVSAESDQYWVWAEMMRRTGCKVYHGAEQDWAGVKAVLGPQIVFSPAFAVFYTELQGRFSKPSAVSVSATSTLLVTGGGEVVIEELVLDGALEIEVQAGASLVIQRLTVKNDGWVPIPLSEAEIAGDEGEAPEAIRIRGFRLDKRGSHCIRLASGERIVNDRENPDDSGVAQY
CL7094Contig1	Esi0024_0057	258	hits with several species	other localisation	0	PF08698			6 exons, 3' UTR	0.899024	-1.83055	0.541161	0.13889	0.173596	0.275388	MVKLAAAAARKHNASSQARASGGSATAAEASSGTGAASSGASGDSRVPSGKGVTKSQAARRRPRLSGVAPRTLDSGLASPKYLQYSGTAKGKSLTASVSSGVVDGGKAAKLMAGSSLYSGRDRAMLLERSKAPKDDTAGKGWFNMEQAEMTPELKRDLQVIRMRNYVDPKRFYKASDKVSKFMQIGTVKEGPSEYFSSRMTNKERKKTLVDELLVADDAFRAYSKNQYGSIQSRKRAGGKAAYNDQKRKRKGGMQWKP
CL1903Contig1	Esi0029_0141	208	hits with several species	signal peptide	2				4 exons, 3' UTR	-4.57398	0.435692	-2.09817	0.964573	0.524274	0.469099	MKLALTLSAVLGVLSTRVECFVSSGGSSLACGARSNKLATNGAFVQPIPSRCVATAERRRRSGDLGMSTVVVPSDFKLPIGIAAFGLAITGLGNVGAGFPVSVVGLLLAFQATRVKFEFDDVAMEVKIGETPDELESSGENAFVGGESRWNYDTWTNWEVYPSEKLPILMYFKETQTKPEGQIHFFPFIMEPDVLLQEVRARVPQVVK
LQ0AAB45YC08FM1.SCF	Esi0063_0124	327	hits with several species	other localisation	2	PF07159	IPR009828		9 exons, 3' UTR	-1.37334	0.658663	-1.18299	0.583773	0.144504	0.203656	MGNLMGLLWRDGHAGYEISLPPLVDEGSERGQQRPKGSPKDGQERQDGELYLQLCLVVERCSDAIQSVQQYEGCSALIRQSMSAPKDTELQSAVTEALLPNVKKIKTFFDLARDVEQLAPALLGRLAGLGSIVEAPLLACMLTELLQAVLEWDQIKMMRPQVQNDFATYRRYLSRLKREQEAGLLLELPVADTDANAISMFIAENVPMMVMLSKVTAKTAEEVPRVQNVIATVANMCCGMVHRRAHTNDATSRKLLMAMTSAAVLYDRITDSGVFVRRSHIGVSKCIKVLNRHGGATGEQLRATLRYSTMHYNSDTTPKNIRDALAR
LQ0AAB96YM22FM1.SCF	Esi0074_0058	413	hits with several species	other localisation	4	PF00023	IPR002110		2 exons, 3' UTR	-5.50079	-0.491718	-3.19688	0.355451	1.30209	1.47728	MPRSADDLLLVEVQNGNKRGVERYLAAGASIDGSPHSGEEFPPVVFAAAVGSASMIKFLVDKGADINSSTWRPGAFPSGSRAIHVAVSSGYAGALDALRELIKAGADLNGRNYQGCTPLMMACRVDKEGAERVELARELLKAGVDTTLVDADGRAALHYAAYSGNEALIQALLSKGSLSTLNLATQDGKTPLCVAVEFVHCGVVSLLLSAGASQRGLQEGNYPCPFRSAAALGYESILRILCSERGMDAVGGGAAVLPNSLACATRRGKARILRLLLAAEGQERQEHWARRRLVLGRPLVYLAAAYGILANVKVLLAAGADETETDPDGYAAPEVIGGQLPSGTLDPLEAAAIGRELQRGPAYRARSWAWPVGEDAPVAGDAGAAGALRGLEITTIKRA…
CL4865Contig1	Esi0092_0068	322	hits with several species	other localisation	1	55729	PF00583		4 exons, 5' and 3' UTR	-0.445422	-1.6992	-1.15208	0.335922	0.143901	0.355462	MPSAKKQRSKKKKAAAPAAPKRSPAVAAAASRIEAANATLDLSAGLEAFLSIDLPAAAAVSGAAAPTPVPAEPVRLEIRSPKTLLDGDTQVMYDLLKSNMHDMYMAAGWGWNKAEKWREMEHRDSRFLIARCGTEDDSGPEAAAVGVARLRVAEEGVSESSAVNGAGGATDSEEAARARSRGGEERKPGGAGERIAGYCDFRFAWDQDENEDGEGVGGMEDVLYVYELQVAPWATRRGLGRRMMQAIELLANRHGMTKVMLTVFKENRQAMSFYTKKMKYGVDKDSPSNWDQPDEVYEILSKPTRQGAARTKEALRMATLLD
LQ0AAB28YO03FM1.SCF	Esi0125_0003	403	hits with several species	signal peptide	2	PF08241	PS50193	PS50124	9 exons, no UTR	-3.34869	-2.47048	-3.59636	0.641069	0.896008	1.17247	MQIATSMTTGGRSIPWVAVLASLSVLSSVTGFQTAVRPTARNAGGRSNRANPTSSPDGSSSTGLAAASTDFGGMLGDKVASAIVGSPIYPLLVRQAKGTMKKSAEDIGVDWDAEVARLRDAQDWDAALAGLLETSSVEVPDYYKKPFHAYADGNLCWEAAWEQHLASKAVGFRNFPEDAERGEYLLRKGYEAQMERLGVLVEDGGLVVDLGYLAEQFPSAGKVVGVDLSPYMLLTGRFMQQEDENADPRVELEYGDAARTGLEDNSASLVSLSLVVHELSTEGRRSILAEAFRILRPGGSVSIMEMDPSAPGYIKLRNNPMLFSILRSTEPYLDVYFSEAGNIDAELQEAGFTTVRKSGVTGRHMAVVGVKGGTFDLRADFKQREKDDTHLQTHRADVW…
LQ0AAB10YF17FM1.SCF	Esi0167_0013	353	hits with several species	other localisation	2	53335	PTHR12303	PF07942	8 exons, no UTR	-1.85849	-4.17933	-3.72649	2.0042	0.298624	0.6699	MREEVDRARTNMRSSAEGRQLGEEFWELHERKLRGMQDGIDRNQAFLNAVVGFQDSSSPFPLADGEKRVPGDPSRTTKAQVSKINTTLRQCMRDWSGEGEEERRESYGAVIAELERLRPVDPRRRGAQKVLVPGAGEGRLAYEIVSRGYGCAGNEFSYFMLMVSNFILNGVGEENEFTLSPFVDNTCNTFSVEDMLRTIRVPDVCPPLTLAGEADLDFSYVSGEWLACYEDQASAFDAIVTVFFLDTAPVVVEYIAAIARLLKEGGVWINFGPLLYHWSDSSLRKTDERFQRSVELSWEEIRIVCACYGLDIVREERQDATYNADQRSMMRTAYTGILCSAVKRSKPDAKGLS
CL5568Contig1	Esi0300_0013	463	hits with several species	other localisation	1	PTHR12706			8 exons, 5' and 3' UTR	-2.29708	-0.0815532	-1.87436	0.490993	1.60996	0.234587	MSTAPAAATPTPSSVNQGGATGAAGMMAEELGQEAKAEIKIAAMLAAERSLEDMAIEPAQYNNVTLFLGRLQGLPVQRQNLMFTYLTGTLDAVLSEARASGVYDEGVADLRASSVTLKNAPEEVAKDPATGAVVLDRGVSWDQALAKRSEAADAGMDEAVKPTSGAKPPKGTGFYRSRHTDITSQRKLVVLAVRKAKHNRLMVITRPNTGTSGYEMDLQELREKYDRVSDNEEATATVQHAWTQAYDSSNGADYRGSRKVTLGLLSGSVLPMWSALEKTVAVCRAQMTKAEEALKVNRVILDDSTKLVGVRLPTTALSTLRQHLAEAVQARKAVVDSGGGGGVDPVSPINPKTLLQVKTPPKNILSFFGRAASPSPSSAATPPPVGGKRHAGVSSVGGS…
CL6380Contig1	Esi0146_0048	358	hits only with bacteria	other localisation	1	55729			8 exons, 3' UTR	-6.7762	-0.628718	-3.65437	0.529745	0.39248	0.744994	MYVCVRRVCFRKLAHDNNISSVHVNFCTEEEVEAFTSSGFSHRKGLQYHWRNQDRKSDDNANNGDNNRGVAGKMTAAESTVVLGPSSATQSEIAQQTVTAAQEGDNGTSPKKYADFDSYLGNFASKRRIKASSFCGIFSIALPLVIKIRRERRSVYEDAGVSVTAYRGDDITDNMMETAFFIYKSTIDKMMYGRLYLNIGLFKELAQSFKRNIVLILAEKNGKVVAGTFNVVKAGRFYGRYWGAFETVKNLHFEACYYKAIEFCIENGLDVMEPGAGGGDFKFLRGFDPAIVNSCHYCTHPGLRGAVDSFLDEERASIDEYDQYLTERSALADRTKIANASTSANAEKAGARNRGDCD
CL7627Contig1	Esi0180_0015	292	hits only with bacteria	chloroplast	5				5 exons, 5' and 3' UTR	-2.3554	-0.817466	-1.3824	0.327	1.35531	0.308564	MAIKACIVAGLAVVQWTPAQAFGAVSHVSSALRPSSCRAMADRTSHNNKRSVSRRPRAVTMASDEVEQRSPVAGSLIRALTGPYVSLGVGVGILLAVLANRIATPELVDSQARTDILGVIASGGLVTNGVYLLDLKVKEAEEVTLVGTFVQEYADDLAPGARRDLQWLGESLLLVSPATSMLVYQDGKTLARVGVMGESADIRDAPILRKCISEGRDGREQYLAALQTLPGKVEFDYLPENCQAVLMLPVLEGSAVVVVGTNRARAFTPKDIVWMKGLCNQAALSLREAVVA
CL2119Contig1	Esi0462_0010	292	hits only with bacteria	chloroplast	1				7 exons, 5' and 3' UTR	-4.06603	-1.94271	-2.50712	0.632662	0.93179	0.451443	MKLTMVLTLLAFGNTRAFLVSAPLSGRTAAAAAMGTSSVCRAEDWAGFARRRSAGLCMATNSELDQSAEYVKAELARVQEEYEANRKAKIKEQTRQAAARGDAAVTPLADLEFHSFLDKDGKVASIDTKGVKASVYAVYDESKTLRYIGVSRGIQQSLRLSLARRPKDTYYFKVQNITRPSRSLLEIIKESWIEENGSTPDGNADEASQAVWEHAINVVPLFTEEDLAVVAEWKEKGKEDRGLKKIAGRFENEILEILEERGVKESIRFDPKLKGRGLLDVKMPKPDSSVPK
LQ0AAB38YP03FM1.SCF	Esi0020_0148	712	hits only with bacteria	signal peptide	2	IPR011046	PF00400	IPR001680	8 exons, 3' UTR	-5.3413	-3.53819	-4.54183	0.952792	2.03408	1.54011	MMASSRRCVLMGGVVLSGARDGSFAVWDTRLQQGRPVKKLMNRVVAEEYSAMAWAPANRLQRRMLTPVEQVFMVHYTEDRDPKIPRSYVRMDETVKGGFDGMVCGRPCASTVTSVQWMPDGQKFLTAGQDGLVKLWDTRYVHHPLQEADPDDESASPPLLSENSRSMWTLDYGKPVPRSGATGAGTGGSGGRRASAGTAKGRRRRRAVSYGSVSGGDAVAEESTDGGGRRSGVSSVHACDDGSRIAVCTVKNRISVYAYTCGGLRPLGAYTGNANRSSYYIKAKLSPDGSLLASGATDDAVCLWQVDCPGLPVARLTGHMNEVTGLDWCRAEPLKLATSSDDETVRVWTIDPLRVRHHSASAPVVAVAGASARSSGGALGSGPAVVGGSSVIAGSGSGG…
CL1202Contig1	Esi0056_0076	322	hits only with bacteria	other localisation	4	IPR006844	PS50223	IPR012336	9 exons, 5' and 3' UTR	-2.25762	-0.930099	-0.844952	0.276935	0.397406	0.248176	MSAGSRRRSLEKLRAAGDSKGQAGGGAVVVVDGTKFDRYITGVPRQYEAVVFFTAAGANYKCTSCRVHLDEFTTMAESYQAARANTPETLNGVDVYFFVADFGQNQLPFQKLGLQTVPKILHFPPALAEGDDGRYAIDQSQHMHMAGQVKAEDMARFVKEKTGVSFPIIRPEPPVMIILVGLLVVAALAIKPILSNLGALLRVIRNKYLWLATSLLVYTFGISGGVYDIIRNPAPFMVKQDGFIMWFHPQSNVQFVAEGFITGIMTLMCGLSGILLVHVAPKLRNSGYRQVAVCVCGVIFLMLFSKVMSLYKSKNMWYRPVF
LQ0AAB73YJ18FM1.SCF	Esi0123_0058	212	hits only with bacteria	signal anchor	3				4 exons, 3' UTR	-1.19931	-3.58564	-0.107158	1.34101	0.46057	0.164544	MYDDTMPCRQRWRDGYIHLSPVALSGCIVAYFYFPFLGVYYDTVTTIVDGDGIGGGQAIVGVIQHLQVRGQTAKLALYVYFRRVLVGSAIFGVVWAVYGVVRSSEVEEERHWESYWTVDAIWEVLYLAVLVAVCFLLRPSMNSQRFSYAALPTLSGKGGDEDGGDILLQSIDDDAEFGGSLDEGEDKADEFNGAIPGRKMAPKPIPKKENQD
CL3237Contig1	Esi0148_0038	407	hits with several species	other localisation	0	IPR001345	53254	PF00300	5 exons, 3' UTR	-3.93806	0.774955	-3.32744	2.53021	0.874128	0.458283	MAADRNAEEHQLFDPVMTCGQVVSTDTTNKVNLADEALYRHYPPVNPSSSGAASGGGSILDAANAYTFETLNRKLASTWCSPSLPSSSAATSCCPPQDPTTNNNNNAMKCLTDNSGNAAAGNTTTTTTRSPTPAAGGIPPTSRLRGGGGGAECRPGAAPTSQLLFLVRHGETDMNKAGRLQGRGVNAPLNGAGLDQAQGLGRFVRNVPFDTVTSSSLLRAHETAMRIAENNEMCLKLAQENDPVPPVPPSTSTKEQEGEKTTPADFCCGDKAQVRVRRLEGLDELSWGELEGEDSKLEPFKGCLAALKEAWDEGVFDRAAEGGENLVEVQARARAAVETILDRGKELNLVVSHGRTLRILMLSLTGLGMDQMTNMGKIPNCGTYILEVRRSGPAAARSY…
CL6842Contig1	Esi0022_0113	702	hits only with green lineage	other localisation	3	IPR002885	48452	PF01535	2 exons, 3' UTR	-4.55261	-1.34369	-3.83328	1.42574	1.41476	0.494667	MIMGVANVGVAHRHSPQDTGPSQAATCGASGGLCGAPRTRRGHPRRPRAGRIPFALEAHAPDGDAANRKKLEGGSRNRQQLGARPYRDSGVRAGGAGSSALPRQQRKSKADKGGRQAGMPMSHLKATLREAKQYGDWRKALDVLDRMQEQGVKPDSQNYSSAIAACGNARQWERAVELLASMAARGTPPDVLTYSSAIAACAKVSRWKEAVGLLRSMKGQGVKPNVIVYSAAISACRKGGQWETAVDLLKEMPAVGLAPDVITYSTVIDACAKRGQWEPAFRLLMEMPTKGVVANIITYSIVIGACAKWGQWEEAVALLREMQENGVAPDVITYSSTISACAKKGQWEEAVGLLREMPMEGVTPNAISYGIVISACAKRGRWREAIDLLQEMQAHGVPP…
LQ0AAB52YF08RM1.SCF	Esi0074_0067	170	hits only with fungi	other localisation	0	PF01243	IPR009002		7 exons, 5' and 3' UTR	-6.56042	-2	-2.65603	1.86858	0.255646	0.648114	MTPPLPDDVVRLLQASRLCFLSTFSNDHPHLSLMNFTYHHTDEVIILSTRRDTKKFQLVQTGRNVALLVHEFPDAGGSSGGGGGGGGGGGGGSGGSGSKVTITLNGTATIQEGEQAERYRDLHARKNPNSKTFIFGPNIAIITVRVRSARICNVRDEVTVWNIADSQSSA
CL2758Contig1	Esi0317_0028	164	hits with several species	other localisation	0	63411			4 exons, 3' UTR	-1.99501	0.389848	-1.23383	0.288251	0.109556	0.31847	MPGDRVLNFGFMYLTVQSAERSAPYLTDRCLEFVQEFRQQLVDLTPGKLSDFVQGLVSRKLEPDHRLSSEVNRNWGEIVTGQLKFDRRREEVEALRKVQEEDLLRFFERHLQEGGEDRRLLTSEVFAKKYESDMELPATEAMLVSNAKEWRGAQEKFPIRIRLA
LQ0AAB43YG13FM1.SCF	Esi0119_0101	214	hits only with phaeodactylum and marine bacteria	other localisation	1				6 exons, 3' UTR	-6.51733	0.813636	-1.71816	0.800031	0.256805	1.35737	MASLVSLANASGKDYNTVPFKVRVRNLTYLQPFSPPLIVAHTKDVALFKEGFPANDAIKLMAEDGDNSALLELSESSDVAPYICGVVVAEGPVFPGETWRGQLDVDPYICPNPVYSVVTMLINTNDAFVGIDSDTLELGSTKAFPPAFDAGTEVNDERCSNIPGPGCPAGSGNNQNGPGEGYIHVHRGVHGVGDLEEASYDWRNPVAEIYIQKL
CL3658Contig1	Esi0322_0006	328	hits only with phaeodactylum and green lineage	chloroplast	5				7 exons, 3' UTR	-3.41555	-0.295359	-2.03501	0.307776	0.527405	1.03213	MKMKSRTSLVLGSCAAIAALRGADAFVPPTGGFATARSSAVHVSSTSSRRGCSGVERSARPRRTGRQQEGQGDALMAQMTDEEMALDQALIQRVTQEVEAESGVELDQLINPAKVINLERDLVKLRAALEDEPGTDREAIEEEIAKKESTLVKEKRMYMQGWLKKVFVGQAVITTILGGLMASDQVPFFPHVDISIQVLGFWFVWLFTVPSLRARKPGASEKVALDIAFLATPVVSFAMPFITKEPVPIYWANIATLVACYGYGFTVGKPDDGEGGASKSQPKWLKFIFKSLDFGSGQERGVRGAARDRLNEKKQEKQEQEQEEQSQD
CL4440Contig1	Esi0322_0006	328	hits only with phaeodactylum and green lineage	other localisation	5				7 exons, 3' UTR	-7.36126	0.160693	-3.21764	0.346927	0.251116	0.800725	MKMKSRTSLVLGSCAAIAALRGADAFVPPTGGFATARSSAVHVSSTSSRRGCSGVERSARPRRTGRQQEGQGDALMAQMTDEEMALDQALIQRVTQEVEAESGVELDQLINPAKVINLERDLVKLRAALEDEPGTDREAIEEEIAKKESTLVKEKRMYMQGWLKKVFVGQAVITTILGGLMASDQVPFFPHVDISIQVLGFWFVWLFTVPSLRARKPGASEKVALDIAFLATPVVSFAMPFITKEPVPIYWANIATLVACYGYGFTVGKPDDGEGGASKSQPKWLKFIFKSLDFGSGQERGVRGAARDRLNEKKQEKQEQEQEEQSQD
CL7437Contig1	Esi0305_0037	343	hits with several species	other localisation	1	IPR000672	53223	PTHR10025	9 exons, 3' UTR	-2.8691	-1.89761	-2.15493	0.276875	0.564253	0.100149	MSTMEEEKAAAGSKVDAGIVAEPFRQEVRKYIEDKLGGVGPRFVGILANTDPAARKYAEWTGRACIKDGIRYEVRECDPEELEARLEECNGDPEVHGVMIYYPVFGAFPSFFGGSMDDYLRDTVSIRKDVEGLSNTYRRNLYHNVRFVDEAKTKKCILPCTPLAVVKIMEHVGVYDESLPVGDRLQGKTVTIINRSEIVGRPLAAMLANDGATIYSIDVDSIFVFKRGALRKTEATPEEAVKQSDVVVTGVPSKAYKLSASWLKEGSAIINVSTFKNVDEEDVLKIPGVRYVPMVGKVTVAMLERNLLRLHENFGEDMAAETLVKRASIDAGSSQEKPQEGSA
CL4410Contig1	Esi0087_0047	332	hits with several species	singal peptide	5	PF01370	51735	PF01073	8 exons, 5' and 3' UTR	-4.93278	-0.19239	-1.92969	0.805068	0.314247	0.753548	MSKYRYLLALLSILGVVHLGKGFKMNPKPPQLPPLKDQQVLVTGAAGNVGQLVCLRLSKQGYKVRAMVRELDGFYPRKEEMGNGPIEVVLGDVLDKASLEAHMAGCSSCIACHGASRASALSDWWTRLKNAEKGHPYNVNYIGTMNMLDAAQRAGVKRFVRLTGLSVGLSAFNPFTYLLNLMISMSIKWQYMSERAIREAAERSGLDYTVVRPGALTHEKRPKDACLMLECDGKPTSMWKSQPMYKIGRQDVANLLVAAMAHKRGAKSTLSCSWGKDKKREGPRSWKKLLAAVNADTSPLPRRFYRPAMIAMGTLNLIVGGAVGGKFLTILG
CL3766Contig1	Esi0095_0051	179	hits with several species	other localisation	1				5 exons, 5' and 3' UTR	-6.10024	1.03345	-0.789905	1.26442	0.375514	0.377598	MTVRDPDAWWNSMVASIHTKNPVLGGWGIFFLEVLKSDVRLYKHMLRYMKTHTMEEDEAKADYVRHNKEVLAHVGADNGRELLEFSVEQGWGPLCKFLDVSVPDVPFPKVNSREELKIRLNRFNRHGWLLMAATVTVAGASVAAASFFGGKRAGGALAATEALVLTSRFRKALALRRTD
LQ0AAB49YI12FM1.SCF	Esi0119_0038	146	hits with several species	other localisation	1	53335			3 exons, 5' and 3' UTR	-4.45501	-3.35924	1.73838	0.486011	0.865947	1.08825	MAAVRVAMHAALWRRGVDPLAVDPWYFPTPREYRRLLEAAGFIVDDVWLVPRPTVLPAGTGMRGWLSTFTKAFLNAIPEESSSNRGTTNENGLTQTKATVVDEALAALQPALRDKDGFWTADYVRLRFRAHLPHDSASGTAVDRRY
CL4669Contig1	Esi0230_0012	122	hits with several species	signal anchor	2				4 exons, 5' and 3' UTR	-1.85779	0.559158	-1.06333	0.79731	0.103041	0.0818496	MPKPPVEPTQEKNNLPFFLDPSTRRVLGGAVVVPTLSLLLPLGAYGALTAVGVDGSKAGAWVGVGYTLIGLIAWVGSYFFRVATKNMTYAVQLKNYEQAVIEKRFSELEEEEVDALLDEVNE
CL1405Contig1	Esi0248_0021	237	hits with several species	signal peptide	3	PF02325			5 exons, 5' and 3' UTR	-1.74104	0.147156	-1.1037	0.356184	0.49423	0.641134	MKVFCVVVALCCAGQAAAGSTGAGPLHGLRSALMTQHQQQRPGGNMNTRRRWSMEKAQPHISPVQGRYSCVAAALPGDSFTSEVVVGGVLNFLSIYNLLITGRVLLSWVPQLQGVQALEPVYLLTDPYLNAFRRLNLTIGGLDLSVLPAFFLLSFATNAVASLGAEMPAPLKRGASWFEGRQAALSRSRRNLAASSVAAFVGRTSSPPPLSSKSESETEAPPGAAKTTRRPLVAFRV
CL1697Contig1	Esi0252_0008	290	hits with several species	other localisation	0	53474	PF07819	PS50187	7 exons, 5' and 3' UTR	-0.220252	1.20972	-1.20223	0.59432	0.986961	0.181094	MALKLPAKCPVVILPGFGNDARDYTNPLDGGEDKAFASALERRGLKTFVVPVERSDWLKVASAVLTLDFWKGTCRPDGPAYSWYLQKVKETVRTSLEETGADKVLLVGHSAGGWLARATLAEGVWEEGVASEDVVAGLVTLGSPHFAGPMDMTRGALTFTSDEYPGAFLKDRGIFYVTVGGAALLGEKDAPRRSRARFAYGSYQTVCGEGGTMGDSCVPLVYAHLEGAEQVTLDGVFHSVDKPDEWYGSEGVVDRWLATVAQELRPSGSKGDGIASFSDMFSVPFAKLFS
CL4246Contig1	Esi0131_0028	222	hits only with heterokonts and bacteria	other localisation	0	PF02894	55347		6 exons, 3' UTR	-4.17473	0.668791	-3.3859	0.165507	1.05049	0.846739	MRKWRTDRTYEQLAAAVRKGAVGAVRSVHAIFRDHPVPSIEFLKQGGDIFHDLAPHDCDFVCFSLGLGEPNEVYATARSFLPQLEEAGVKDSAHCLFTFPSGAVFTLEMTRCSAYGYDNRIEVMGEKGMLSLGNPPSSGLEFFDSTGCSTSPPEHSFPQRFREAYAMEVGAFEEVLRGNSEPLVTCHDSCRTTHMAERASVSASSDRPVAISFDGIMSGYAS
LQ0AAB42YI20FM1.SCF	Esi0297_0018	290	hits with several species	other localisation	0	IPR002893	PF01753		6 exons, 3' UTR	-5.36051	-1.65144	-3.28843	1.07359	1.03169	0.457602	MSDGVKVLEGGGGGAGGGKSPTGRHWHLAKVGHGTSSSADASFESMGPEMDRGVYVTVHVQDILVDEDISPSLVKGLRDSGRAEVLPRLYHAVLPTLIAVDDVEGLRLKSKALVDDEGGDRGGFAHLKKPVGQSSGAMLSYNGPIRGVGNIVESVPVAAVQERGGGVANQPLGSVSPSAANAFGEVEGNDSGYANGKPSATATAVSLVGLDEETRRVLAKAGLGRMPATTFEWVKFERVQQGLPADPPCPVCQKPNAQKRCTRCKIVRYCSRECQKQHWPTHKLECYADS
LQ0AAB37YL12FM1.SCF	Esi0063_0089	341	hits only with calydomonas	other localisation	0				7 exons, no UTR	-5.24063	0.569294	-1.15289	0.612117	0.551387	1.97541	MTTMATPSSIFAPRRREAESRTFWDTERVVLKALDADFGRMLKEDRIVKLMAKSDNAVAKGQKSVAESLDEVKKAVAPFYKSILCIFKYYCLTPSQSVRGAFSIQPNQFGKMMQDTELAGNFISVEEIGKIFVMVNFESDKRSAEATVNEDRALMRFELLEALLRVAITVRDNEGQEELSPAEKMRNVIEEQLLVNLPPEALEDPDTFRNETLYTDACDGVLQEHQKALGIVYQKYSMLDPIAGKPSFGLEEWKTFTNDARLIGDNIHMLRMGLRDIKQPFYMARMMLTFVDFLEALTRLAIAMPIPSDQDMREAEVNTLRCNPQVFSRLCPSCRSYHNTR
CL6573Contig1	Esi0297_0030	558	hits with several species	other localisation	0	55729	PF00583		5 exons, 3' UTR	0.280842	2.51393	-0.432845	0.411565	0.133902	0.346299	MNHLAFVASTVRTRTSSSSSPSTFQLQRDVRKTAAVPPRRYEQQQQTSRLRPRCGWGLERPSLSPDPVPDAFSAPLRRRRRRPRQQQQQHLVVAASSGLQEPLERVASIPVQEAAAGRGDRVSYGRGGTVVEAAAPEGVDAADGGGHERKTAGSVYGDEVGVLRGAVIWKGEENDADKDDGGGGGEDDDFEGDDIDIYLPGGMGAGLRPGAKPRRKRPKPPVMWSKPVRGSKRLAVVLAGREDLDEAGALCIKVFFGQPDSPWKAAQLRQLLHEQRQDLESRCSRRESVMFKAIDTRRKDGMVGFVEVSETSGSKYGMGAGITLADTRPVVSNLAVDPRVRRCGVGSALMEACEDLVKTWSFDEIILQVEEANEAALAFYGGKGFKKLFVDKAARRYDT…
CL2229Contig1	Esi0006_0213	312	hits with several species	other localisation	0	PTHR10145			8 exons, 3'-UTR	2.58522	0.123142	3.82368	0.665787	0.269982	0.271549	MHTDIKELGKQPGSMLAPRLKIGGEEYEDLDEIISRRVSACNDLVNDLLASDKYNPGTSAEVEKTLQKQKDDAPNRIPYLMCRRGVPGYVNLMYLPAHTVRKIVVEVSPEGYVMSKRCFKTLPELFKWFKLNAQQLGRSSRTSRKSSSRQASSSNGTSTSSSSSHYQQPPLPPDNVPPPPPPRPAAPAPAAGQPQYPAYSGGAYGYNSGQPSYGSQAGYAGAPAPARPGTRWGQTPAATTAAAPQDAAAAAYQAQYAPQPQQQPQQQQQQQQQQQWYDAQQQQQQQQMLYQQQYRQGNEYHQQARDGSQARN
CL107Contig8	Esi0025_0118	454	hits only with diatoms and bacteria	other localisation	0	52540			8 exons, 3'-UTR	1.21597	-2.59492	1.40587	0.380107	0.832682	0.20051	MWLPIALRDVATGDPWVTMCLIDYEHYQKSMADEGRAPLPPKGFIYHETRCGSTLVANMLATLAPSRVFSESKPPTQTIRECLTAGCDRHLLVKMFRNTMALMGRRRNGEQHEHLYFKFVSQISEAYPEVPWVFVFRDPVEVMVSNLKSYAGAPCVRIPRQEKLRKQASRKFKKLGGGGEPAMLKSKAARDAAALQKTRPKFGRGRGRGSEPWGREPEGVRGGGKRSRSLVEAAVVLGGSAPGEGVTATANGVAAGGGGGGDDAFSERDTGVVVWEEEEEEEEVEDGDSDFYASVSWSGGISGGIESSDLPLYPAAYSSAALFEPSPWESAAFGADERRRSLATKKTGQMLTMNMTMECANWLQAMCAFALAAEKETPSKALFVDYANLPDAVPEYVFP…
CL4Contig2	Esi0015_0186	216	hits with several species	other localisation	0	54427	IPR011944		6 exons, 5' and 3'-UTR	0.562945	2.80916	-0.466666	0.589364	0.400713	1.02449	MNFGKMPAGRTASRLARVVGKSESSIQSSVRAAGSMNALLSTRSGLTVTQAATRLAAVKLPVRQMSGQADYAANYTADQKAVDAATRNWRDNVTANTEDAPKKTAAIYADDALFWGTVSEEVRNTPAHVYDYFDFFARMPKLSMVAYDPAPPRIHGDFAIHAGAYTFAWAGADGAMTETRARFTFAYRRENGKWVMVEHHSSAMPKAPPGLKPAQH
LQ0AAB15YB03FM1.SCF	Esi0081_0090	410	hits only with green lineage and phyophtora	other localisation	2	52788			2 exons, 3'-UTR	2.36955	-0.680518	1.86479	0.228976	0.685705	0.173692	MKRARDQSSTIVDTGNHHAVVGPARAAASPAVVPDGGARVSETTTSKPTLLPPPPPIQPFSDDSDDARPAGDALSSSSSSSSSSAGGSAAAEEGRRKRAKREPQQELEGWRAAANAILSAGVKEDGAGSRSSKGESSGSSRKSFAVVCSSNVNRSIMAEILLKEHDIRAQSYGTGREVRLPGKDSKSPQSFPFGTPYVEIRDFLARQNEALFRRNSVLGLLERNATTKRAPERWQSLDGEHVASFDVVVCFESRVFDLVVEGILTFLCSLGVNSRCCGGRCHWSSCRWSWCGSRCRRMFGLEWSGFGRGGQNVAGSARIRNFSVALGVCELAYVTLGVGVEMDLWRQPHMHDILRKILQRGPWPSLVPLPCDGASIDSPLNICTGTEVACRCRACRCVR…
LQ0AAB6YP01FM1.SCF	Esi0002_0214	330	hits with several species	signal peptide	5				4 exons, 3'-UTR	1.96181	0.653253	2.19128	0.202613	0.545438	0.175742	MVAIFVMPHSCRLLKSIFIFVMGSLLWAVPLWRNSLVFHDVDKMTSCFIHLFPSWLALTLRWYPLDPMRGGTAGAEPECQDGFDMGDVGTAMGMYLAWQVLYFFKTEIADKPKLDADPEIQTSLRWLTTSPSNPMHKIVLALMRKTGMFKEDETFDPTTFKTKMIFMGSQLVFTVLVSLPTPFLYNSKWASISLAFFVFLCALWNSSNYYIEVFSRRYWQSMEAESAAKAEALVVKATRQRERERLRSGEDGIAAGGQMLSASSGGSGEDLADDDYEDGEDWEEEADAAPAADEEEEEEAEAVGDMDGLFGGEVGAAADENPGQEKSKDV
LQ0AAB84YG06RM1.SCF	Esi0004_0085	225	hits with several species	other localisation	2				6 exons, 3'-UTR	-1.40576	1.36384	-0.71615	0.275093	0.118774	0.331512	MYRTDGKDYPKSLGSSAKVGFTSVDPWLCFSPCKNNIADAAKAQVSGTPPAAAVSAESDQYWVWAEMMRRTGCKVYHGAEQDWAGVKAVLGPQIVFSPAFAVFYTELQGRFSKPSAVSVSATSTLLVTGGGEVVIEELVLDGALEIEVQAGASLVIQRLTVKNDGWVPIPLSEAEIAGDEGEAPEAIRIRGFRLDKRGSHCIRLASGERIVNDRENPDDSGVAQY
CL6901Contig1	Esi0010_0195	347	hits with several species	other localisation	0	103025			7 exons, 3'-UTR	1.34851	0.514986	-0.0294988	0.210318	0.358952	0.35343	MTNDMGLLDENGRLPSISAAFLNPKGRVIADALVTRSPRHEAKGKPLYKLRSKVRIKDATALYDVLVSGVRDPWQAPEREGGGDVSPAAAGRLGDGAGGGREARFPDPRSAALGVRLIRPKDETGPDGADWPDGDPVVPEGRYHALRMANGVGEGSELLDSIPLESNLDLLGSISFTKGCYVGQELTARTQFKGFVRKRVLPVLFPEGAQTSFDPSAASDEGERQGLLLSRWGGVAAPPEAGSKVVDRAAEDGRLGALVSVSPEYNVGLAMLRLGKVLSPASGGTDASKTGNTGSAGGQEDSLAHPALDCRVVGASSQGEEERRRCLPLIPPWWPVDLDPTTGKVPV
LQ0AAB80YE05RM1.SCF	Esi0011_0028	295	hits with several species	other localisation	0	56300			7 exons, 3'-UTR	3.17928	3.37561	1.3209	0.25543	0.0881079	0.504339	MVFSHAPPMGSGLRVVQGVHIKNQCAWLNHSVGDRERRYFLRMCRKYGHIKAWFSGHFHLSHDYEDSISVVDGCAFVQVGVIGEKSTRDGRRQTRLVRGTAECLQVYTVSHHVEGAADARLDVTLNYDDPTHPVIAHGHEDYDHLSWFSAYLPEEEDGCYLDHTQLESDAGGTAVASHSEDVQCWWHMRDGRVLGVHDGMVVEYDQELLAPIGVVRDREQLKGREVVVIEGGDAVMLVQREGGAGDASSSSGDVEVIHPNAKGGYSTVFQRNKAVRTKEMQREEMAQQWMRKNRS
CL1775Contig1	Esi0022_0051	215	hits with several species	mitochondrion	1	IPR000387	IPR000340	PF00782	3 exons, 3'-UTR	2.54813	2.914	1.99526	0.255629	0.085534	0.384813	MFRCVLRRVSPSFLPQQPLTAVPYPSLTGKVRTEPLSFVTCSTTRRPVSGKMAAPGQAEEFSAREWKDGEAHEVLPKVFLGSMEAAKDKESLKAHGVTHVLTVNGKEPAFKDDFKYKVIKFGGEDGPLTPHLSESLSFVDAGVAAGGVLIHCTHGTGRSAAMAIAAAMKENGKGTPAGVGDFAEAFRVVKLRRPGTDPPMTFQQELGEWASSKSA
LQ0AAB29YJ17FM1.SCF	Esi0022_0051	215	hits with several species	mitochondrion	1	IPR000387	IPR000340	PF00782	3 exons, 3'-UTR	-0.555313	3.045	-0.00553602	1.47518	0.368606	0.530461	MFRCVLRRVSPSFLPQQPLTAVPYPSLTGKVRTEPLSFVTCSTTRRPVSGKMAAPGQAEEFSAREWKDGEAHEVLPKVFLGSMEAAKDKESLKAHGVTHVLTVNGKEPAFKDDFKYKVIKFGGEDGPLTPHLSESLSFVDAGVAAGGVLIHCTHGTGRSAAMAIAAAMKENGKGTPAGVGDFAEAFRVVKLRRPGTDPPMTFQQELGEWASSKSA
CL1597Contig1	Esi0024_0160	722	hits with several species	other localisation	2	PF01031			19 exons, 3'-UTR	1.09427	0.909606	2.21094	0.24872	0.529023	0.294226	MWFLGSTGLTASWDSALGCYRRWRCGGLLKENAQGSRANRNQLQLREGVSLKEAHDAEMDFFKSHAVFKTVDSTCLGVESLTKRLVSLLTVRIKDALPNMKWELQESLSEVERDLIPLAQHAPQKFGDKLKTLVQLIGVFCRLLRSSIKGEYRDPALNTHPELRVRSVADRAFRDLQSGVASLNPGFEHPDFPKVLQDQLKAHRGRELCGIVNSQFFFIFMLQQVEKFRPVVETCRNLCCNSLLNIAVSLVSEVAPQYPRLQQAFQGIIESTVPNMAEELQPELDQLFDKEKNPFTENQDLVEAINQVRFERFDRVLHQVLVEAGDGPPNGGDASDVTPLKEWVTYNLGQWFRFAHGANPTSKVEDMSTILQAYWRVTSKRVVDNACMLLETSFFGQVV…
CL5307Contig1	Esi0025_0063	546	hits with several species	other localisation	4	53474	PS50187	PF00561	10 exons, 5' and 3'-UTR	3.23308	0.164123	3.20034	0.38531	0.400293	0.272979	MTRNGGASKGSKAESCAFMGRLDVLTTAIYPHELAQEDEGDSPPPFSLTSFSAVLSALAGIVNLSGHVFRPLVVVCLSALVVLGIARNYCIATGLALLVHRTFFDGRLEELKRLSHLRPGLHCGRTARTDAIVSMVPALQHPHYKGTPWIIGGDLATLYPFLAFRSLAFHVPVVKYARRWLSVDADDTRNNGTKAQKAGGGNGSNGGIGVNHGFSDSLDGFTPCGETPSATGAVPSAANGHGTGDDGKGLDNSDDKEAVALDIALPDTGLDPDKPFYLVLHGLTGGSAEPYVLDFVAHALRRGCGLCVMISRGCMGTPVRGDNFFHGARISDVRSTVTALRRSLPEHTPLVMVGYSMGGIIATNYAALTGENSGVSCCVSMSGSFDTRTNIESRHSQQV…
CL7206Contig1	Esi0025_0063	546	hits with several species	other localisation	4	53474	PS50187	PF00561	10 exons, 5' and 3'-UTR	3.68862	0.374555	3.29501	0.290294	0.456142	0.31643	MTRNGGASKGSKAESCAFMGRLDVLTTAIYPHELAQEDEGDSPPPFSLTSFSAVLSALAGIVNLSGHVFRPLVVVCLSALVVLGIARNYCIATGLALLVHRTFFDGRLEELKRLSHLRPGLHCGRTARTDAIVSMVPALQHPHYKGTPWIIGGDLATLYPFLAFRSLAFHVPVVKYARRWLSVDADDTRNNGTKAQKAGGGNGSNGGIGVNHGFSDSLDGFTPCGETPSATGAVPSAANGHGTGDDGKGLDNSDDKEAVALDIALPDTGLDPDKPFYLVLHGLTGGSAEPYVLDFVAHALRRGCGLCVMISRGCMGTPVRGDNFFHGARISDVRSTVTALRRSLPEHTPLVMVGYSMGGIIATNYAALTGENSGVSCCVSMSGSFDTRTNIESRHSQQV…
CL6153Contig1	Esi0034_0121	201	hits with several species	signal anchor	5	IPR001036	IPR000731	PTHR10796	6 exons, 3'-UTR	2.83008	0.791483	1.57475	0.310021	0.420683	0.21302	MFLFAEQYLVIYDELLSSFGLALLAVLVLSLFVLGKVTVVLLVCLTLAIIDVELLGFVYHWNLDVNSITVIELIMAVGLVVDYMVHIVHYFLHQDPSIPKDARIAEALGEIGPSVMVGAATTFLGIMPLAFANNVIFRVFFKMFLVIISFGFFHGVVFIPVLLSMLPDRLVSQSAPEEDAASVERHTGSKKLVVLEGPISV
CL6773Contig1	Esi0046_0023	129	hits with several species	other localisation	1	IPR012336			3 exons, 3'-UTR	1.15038	-0.606419	-0.285204	0.151077	0.43962	0.20808	MDMRLGELAPRHLETKFLRIDAEKAPFFVQKLQARGVVFEVKILPTVICFIDGVAVHNIIGFDGLTAGLPPDKLDEWPLSNLARELALAKAIIYSQRDAPEGTGPREQGGYTGAIRAGLNDGDFSDEDG
CL6483Contig1	Esi0047_0025	1608	hits with several species	other localisation	6	IPR013209	56784	PF08235	11 exons, 3'-UTR	-5.60544	1.07435	-0.608058	1.90726	0.0794685	0.563491	MLLYMWWKVHTTSSRERVIQLRVNGRVVPLCMKLGAAGEAFFVERVHNPLRRDLATSPLTSPLREGRIDADAPDNNGGAGGQWDEESGAQDDWESRKPKSGRRKHNARRARGRRATSDMDESCLASVASVEEAGGARMTRASTAAESSTGTPWPSSPPATAAAVMSRARSLQDHLGGGSGSGSGDEEPTAVAWAIGAEEISGSSGGEGGEGGGGVTTGAGGAPSLTQDNGPPLVSAFRGNEGGGGALAVAPSRPVPGVDAGGAGQTGYHHPPSTGGGERQDAPGVARAPLAKPSPPASSGGGVFVAAGVGTGASLSADPSAAGERGAADAAAGQPQAPSASPWIGRGGSDDGGNDDDGGGGGGGGGDSPSPPPAAAAVHPPQGVASGGGGHDDETAMRI…
CL2152Contig1	Esi0061_0125	343	hits with several species	signal anchor	2	PS50241	PF00657	IPR013830	11 exons, 5' and 3'-UTR	-0.883814	1.2242	-0.181327	0.199184	0.126115	1.76032	MATTASASRDGDELYGGEASRRLLAEGAPVSDLEAPSRRKQATAIRTTAAATTQQQTSRCSRKTAWVSTLGVLALGFIGYAFFGRCGAGYVNCDYELELPESVNRAAVPVGRELRPGWMKHHAALVAEAEREGATTRVLVLGDSITEELLGKEGGKTKSGWGSLAVWLQYFAYLGAINLGVAGDQTQHLLWRLQNGELPDVLQPESILVAIGTNNLGAGMDAHDTVGGVKAVIQYVREQRPDAMVSVMALFPRADPKHKKSTTPWPVIDEVNGMLERMLRLKFGTKKVLFVNCSDRFVVEDDSGREVLNKDFILPDNLHLTSDGLKAWAECAEAAVHSGLRDN
CL4767Contig1	Esi0157_0041	116	hits with several species	other localisation	0	PF05882			3 exons, 5' and 3'-UTR	2.292	-0.883613	0.785545	0.424036	1.28592	0.247941	MASHVVRASVVKRLYKDILRQHRFALPPKHRELGDRYVRSEFKAHKEATGDQVAQFMHAWRSYLEQLRNQGGQVGRSLSAADVSHLNDEQRKQLVRLKQQASSSPPSSASGGAQGR
CL4022Contig1	Esi0175_0051	104	hits with several species	other localisation	0	PTHR13212			4 exons, 5' and 3'-UTR	2.29449	0.652274	1.97296	0.230592	0.301243	0.654803	MVCEKCETKLSKVIVPDKWKDGARNTTGGDSGGRRVGHENMLLKHGAAKRRNNRFTPLTRVCRICKTKVNQDHHYCQECAFSKGICGMCGRKTDDITNQRRTAK
CL7409Contig1	Esi0199_0045	265	hits with several species	other localisation	0	52075	IPR001611		6 exons, 5' and 3'-UTR	2.04707	0.742274	1.33657	0.138615	0.563451	0.092758	MENPMAPAAEEDEMAEMLKSVKRDGTELSLAYRPFGSVPESLALAEGRYVTSLNLTECDLKSFSNLVCFPSLQTLVLDKNDLEDIKACPTIPTLTTLWFNNNRVADLPAFLDQVLERFPLISDLSMMRNPACPGLMDIKRPDMEACRMYRTYVVFRAPQLVTVDGVDVTEGERRDAALRGQFTVKRRPQEAAAGGAHPMLAEPGGKSSGGIFDRKPKAVLDPLAVRPLVNVASLPSRKPVGVYGRERRYDGAHSEGNRFIVDDHL
LQ0AFA7YE07RM1.SCF	Esi0277_0014	368	hits with several species	other localisation	5	IPR002952	IPR009567		5 exons, 3'-UTR	2.14772	-0.00949573	2.28263	0.286801	0.631785	0.346539	MKMPRRSLASLVLGAGSLVNAATTRSQARNDGRILLDAVKVITLHDSKDTAGRRSAPVPQLVCRGGCQEWAPEVVQCYNMGSDGTDAAWKCEANMPDGYSFSSVEVGCEGYDHPNDPYILKDSCQLIYSLRAPRGNGGGRGGVGDDGWGSSARSWEDGNNPTWDGRPAGRKRGRGEVGTGRGFGSRLMTWAVLGVVGYVLYNTFLRAAETPFGSGPSPPPPTSGGGGGWGGGGGGGGGGGGGGGGGGDNWRGGGTDSSAGGPPSKGAAAAGTAPAASAPAQGGGVFPWLAGGGIGAALGYMLRPRHRRHAPARGGMAWNQGYGTGTFGGGGGGGGRAYRRRGSGGGGGGGGGGGGGGMQAGYGGTSRR
CL3642Contig1	Esi0278_0043	571	hits with several species	other localisation	2	56399			12 exons, 3'-UTR	1.21707	1.82908	4.34537	1.62274	0.982974	0.330357	MALAQPLLYPLLQPKGEAGDGDDLLDQYRRAELQTLAKTNPLVCAALTVIEGLKNIVETCLVCGDQIQGHTVSMPTVCHQRLCTSTSRVLERRKRWTFEFHQAQSPTMSPARQVVRKKLFEAPSDIVLVSPAGGVEGQVLNNGEVVELLINLFRRALEGTRPELGFPDAVFGLRGTGRKRTKSVIEKVRLVLNALPSVADMQRCIRGEGSLGNEEKKNDSIGELSSPSSFVCQVGGGGGVSGGVGVPFGARVAVAGVDDDTGRGEGSDAEAKEPPSGEVSPLKEALSKIDQLLYPLLEWLLSTIHGGHLHLLKEAEAIQGVSCKKQFVLTDTSAREECFQAMKREAAASSNGTGSFFAFHGSAPGNWHGILRLGIKNMSGSEYMSNGSVCGKGIYMGRT…
CL4001Contig1	Esi0055_0056	298	hits only with bacteria	other localisation	2	53474	PS50187	PF00561	6 exons, no UTR	0.102437	4.30793	1.29026	0.267429	0.476785	0.47309	MRRGFSVYTYDHHGQGLSGRLPVPDGADPTVAHITDFDHYVQDLERFSKVILPATVRPRDASGGTRTGGQGTAGSGDSPVVNGEPLGCDAPFPALSLSVVAHSMGGLIAVNAALREPELFDGLVLAAPMLAPNTGKLPNGVVGALTWVVTKLGRQGHRSPIRRPARATMEWSRVTHDKERLRLWETLRGTVGCVLQRGPSFAWLSKSVLASKRARGRLHQLSVPVLVLEAGLDHLVRSDGIARFRRKVPGAGYRLFHGAYHDLFDETDDIRQARKYVVNTFTQATVFSLHVTPGAKIV
CL3040Contig1	Esi0125_0012	273	hits only with bacteria	other localisation	1	51219	PF01987		5 exons, 5' and 3'-UTR	3.31414	-0.564138	3.50052	1.89781	1.40491	0.197511	MAMSEPFANPDASPDASPRFLSLGEGSEVLQVALCPGDAILANEKAFVYRGLGLQQELQPTGPMGRALGWIGVKNDRVVKFTNEGNSPTYLGLTASLPGKVIPVSLAKSGTLLAKPSVFLCSVVENDISTAKIKLQSEGQSSQQSVEMRKIAGAGMCYIHGGGAAVQKALGRGESMVVEFGCVAAVSDACKIVPEERNGPLIREPPYFQGFQVKITGPGSVFIQSTHTGRLSRASRADRVAQGGSGGGDMMKAAVLTLVIMIVVFTVLDWEEF
CL6447Contig1	Esi0384_0025	201	hits only with bacteria	other localisation	1	PF01987	53927	IPR002086	5 exons, 5' and 3'-UTR	1.48705	-0.0202787	-0.499573	0.216724	0.437147	0.581135	MEASGLAPEEVVLRLLDVIEKDIVPITTEAVKKGNKVFGAAILKLSDLSLVVAGTNTEIECPLWHGEVACIKNFWNLPEEGRPLPSECLMLATHEPCSMCVSAITWSAFKEIHFLFSMEDSRDAFNIPHDLRIYQEVFKCERATRENKFWKAYDLPKVVETLPENGALGEKVTMLRETYASLSELYQDSKGGASSTRIPLS
CL7356Contig1	Esi0420_0009	261	hits only with bacteria	signal anchor	1	55961	IPR002913		3 exons, 5' and 3'-UTR	-0.00219572	-0.8899	1.59016	0.632928	0.911368	0.127112	MERDVAGGKTRALFPYLYRRGASASVWLVACGALLGVLLSPEIMKYLARLRSSSVEPGDGEESIAWELVEDSGGFRTFSSRVQGSSSLALRGETTVDEHIGRLYTAFLNTTSTLDWVRFLVEVEELPTQASSRRGGSGDGDVLFQKYDMPWPVKDREVVIRRSVRLDKRAKKMIASYQSTDHPARPITSATVRAIVYRTSWILTSLGSSKTSIEFETRTDPKGSLPSAMVGFLQVKFPRETVAGFVSSARNVELHPAMTKW
CL1427Contig1	Esi0024_0101	222	hits with several species	other localisation	1	PF03357	PTHR10476		5 exons, 3'-UTR	1.97256	1.48774	2.40454	0.23927	0.362953	0.299025	MDGAVDTLNDGFTLRAIRGAAAKDAKRAVRSGERDLDKEIRNLDRSEKSLVAEIKKTAKGGNQGATRTLAKQLVQLRAQKDQLYSARAKLAGVGNAATTAATSASLAGVMGNVAGVMKKVNEAVSTEETAKIMQQFAVENEKMNMSEEMMDDALIDAFDGEGVEEEADGVVGQVLAELGLEMDGKMVDAPTNTPAGVARPSEAEDAKLDAKTEELLAQLGAL
CL2760Contig1	Esi0053_0025	63	hits with several species	mitochondrion	0				4 exons, 5' and 3'-UTR	-0.396019	1.23486	-0.0136032	0.264417	0.168823	0.274558	MRKLSRMRKDKAFKESFTNSLPVFLLVHQLLADYSFSLPMRRYIFELFEQVAPGSLNWEPYVA
CL1353Contig1	Esi0119_0044	171	hits with several species	other localisation	1	PTHR10476	PF07738	IPR008979	5 exons, 5' and 3'-UTR	0.0814541	1.84485	-0.195567	0.811484	0.03439	0.184088	MRDYANAALGGKVLTSKGMVSDTYTPSSWWGPSRYWHGAGVENGVGPVESVISEGSSLGACWAMSGSEGLVTIQLPKKITVDGVSVEHVSRMVTTESGSAPKELEVWGMKNKKDKKPAKLGSAVYDVDGRPIQTFRIEPPGEQIELIQFKILSNWGNPDYTCLYRLRVHGR
CL2424Contig1	Esi0176_0002	553	hits with several species	other localisation	2	53474	PTHR10992	IPR003089	11 exons, 5' and 3'-UTR	2.39823	1.10657	1.37092	0.300935	0.568609	0.414223	MGQAATREAGARGEAPATTTTTGGGGGGAAEVTIAAAAAAAASSPVLPLATSSSSTSTSSEEEENNMAAAAAAKTPCRVTLRESLAKMRWTASSLDSLRSAEERLFKSALNLNVFDADIGSEQHIHTVEGGKGKSEIPVVLCHGYGMGVGGWHLNLGELTASTHVMAKDWLGCGLSSRPRWDLEGVKETEAFFVDSLERWRQANEVDKMVLCGHSLGGYLSVCYAEKYPQRIDKLVLASPVGFPEEPEGFREAIESRPFAQRNLMKFVGWGWAKGITPGDVVRTMGPLGYRMMMGYSNRRFQQAEFDNDTKFNESMWIRVPGERGRKDLFVGNVYMPPESKNMGEFTREEVEDCVAKLKNRKAAGADGIVNELLKQGGEEMINMLVRIFNWIWKHEYAP…
LQ0AFA6YI13RM1.SCF	Esi0199_0043	271	hits with several species	signal peptide	2	53335			4 exons, 3'-UTR	3.50694	0.834342	2.434	0.45993	0.730575	0.2313	MAPIFSGACWAGTVVWPAALDLCDYMSEHLRQAMVGATVVELGCGIGVPGMVARLLGATVVLTEQDELLSLLDRNLDGNFAGHPRGEGGIRREALDWEREADTDGLLASLERSGTAPGEAEGEPGAGVRRRSTRLDFVLCADCVFEPLYGDSWKALAKVMGRLSDAGTTVLCSVERRGVDGVPEFLRACEAEGFSLQTVYRAAPSAPAPVELYEFSKGVFRGEAVAVVESDGGMEGGDGKGKPMEGEGGGALEVVDGGAVSPGAGSKSTAR
CL3857Contig1	Esi0002_0246	135	hits only with green lineage	other localisation	2				3 exons, 5' and 3'-UTR	3.04378	3.45674	0.39604	0.271091	0.173295	0.25759	MLIMVVWQTLSRAQDNLTSVAFTQILSVIASGIGLHLVYLSINYPICKYILKLKRREFKAVVLMSSQKTLPVSVTVIGFLGNVGQEGLMTIPCIVGHMSQLFMDAYIASRWANDDVAAVEDEAEGAKTNGVVSTI
CL1459Contig1	Esi0014_0125	504	hits only with green lineage	other localisation	1	57850	PF00097	IPR001841	4 exons, 3'-UTR	1.83131	0.800858	1.36868	0.139571	0.15928	0.320529	MQIMVPVPTSSAETNPGGGGQVFPEDDDPVRVSDDVGEEAEEAEEAMEEAEAEQARDVMLITISIVVGCGVLTLILLCVVRKVMDLCLLRNDPTGSLRYSQEEGLTKRSIERLPQTRYKRPVSGTAQKKGDKKTPASDGKKPDDTEAAAAGEEGGVTGSDLHGPPGSSTAAPKTAVVAGAEGGEGEGARDSTEDMCAICLVEYETGDELRIIPGCGHRFHKECIDPWLETKAVCAYCKANVEARRTCCDRVYRSVSDRLGINLVAPTTIRFSSSRRTYTNEDVQLAMGPTLPASYGHSEMDYVGSAVAPRQASVDVEAGEGGEAEATTPTTAAAAAPGQAFGGGGPAGSGSTRSTRGAIVLPDQGGQPQGSIVVQPASAPSYVVVPREYSLGGDGIDEE…
LQ0AGA1YF12RM1.SCF	Esi0002_0018	417	hits only with ostreococcus and chlamydomonas	chloroplast	2	IPR009007			5 exons, 5' and 3'-UTR	3.66413	6.0738	3.42507	0.71536	0.265944	0.611812	MRWNVSLLAAEGLLVGATGWSSCNPLAFSPPCEACASFRRPRASRHQAERKKQQHQQQQHQHRRVEFKGFRRRRVLHTTMAAAAGDGGGGDCGDRPNKNYNKDAWQRRASRAMKYVSMPIVKMAGQPREQIMIAMPFPAANATVHFSFDTLRRTTLITPTAKDALGVLEGPGIGGQPDFGACVELPAARIGHEHGDHYLLVMDAVVKVLGPNTGGVLGLDFLNRYDLDLNFETNEARFYVAGAVDQGLVDTSLLEGLKCGSLPGGKLAIKMELNGGGPFTGVLDLASSTTVGNWLAARDLDVTSMASGQSSSYPQETGRSLPLMCAQFDTIQLGHVLLASVVDAKTASEGRLAVYVGHLPVFDSIARDISIREPRSRQLALVGQDLIGHTRIVLSCRSK…
CL7630Contig1	Esi0173_0014	534	hits only with unicellular eukaryotes		10				7 exons, 5' and 3'-UTR	1.57665	-0.0631933	1.38393	0.175904	0.73524	0.502732	MAEDAARPFLQQGPEDDLGPRLLNSSNNNTTAAEPPATDRAWAVAFKANVAITVVSAFSFGSAGLDEFVGGDESGRRLSTGGGGGVVGPALVVFGIVGLAWAFAWGVLHAVINYSERILKIAYLSLAGISGMAAVSALAAGHWFGCLFPAFLCAWTVRFYLKRQSRIRFGSANLKVAGLAVKSMPWTVRAGLLMSGVQVLWVLLSAMAAGGTIASLRTVTGLDGTTYKASSCSDVMLDPPTRGMVHHLSCMCGGHVASYNSACEYEGRGLWLALFWLASLTWGADVIRNVVTATVTGSVASWWYSADRDASPVRGALYRATHGSFGSLCKAAAISTAVRLLTRTVRRLAKVGRCGSFVLGWLQRLADYILAYSICFISIYGLSFSEAGQRVSELFRRRG…
LQ0AAB27YK04FM1.SCF	Esi0100_0095	265	hits only with phaeodactylum and marine bacteria		1				5 exons, 3'-UTR	1.26635	1.16597	0.519261	0.11687	0.187701	0.369616	MAGSSAPDYAAWDSVVKAHVKTSEIRGIPLNVVDYQGVRDDPNFETFVESLKNAPTSGLGKDAEYALWINTYNALAIKMVTDNPCKKRLFRTKRITSIKDIGSVVAPVWKKPAGVVGGETLALDDVENVKLRDPKDYPADPLLHACIVCASVSCPDVALTAYKPETLQADMEANMRLFLTNPKKGLSLDKAKGVIKLSKIFQWFEGDFTTKIGKDSVLDALLPYMPEDVRTYVSENKGSLKVDHFEYDWGVNGSSPGAPGKGGKC
CL2849Contig1	Esi0136_0065	427	hits with several species	other localisation	1				3 exons, 5' and 3'-UTR	-0.593468	2.02272	-1.29045	0.495287	0.171981	0.397804	MNSSLSQGVLPRRAKSGSRRAVTSSSSRTAQSYGGRSTAFRSCHSSSSGRRRGAVVGDAFGTCTRVACAAVIALVLLGDNSSARSSLPSDRRTAASGHHRQHHHMAWQLFAPKARSSPSERAAASLNLKRRTRLAGADSVSAVSPAQMYRVTEGSSSGRGRGQRRQHEQRFSRDDSGGREDGRSSIEALQSPRSAELLTAYASASSAAAAAPQPPSQQRPPSIAECIGGGVVTQGEGRPALPLLDDEDLTQLRAGQRVQKQTRQGGSGSGSVVVDVRADPDVVLGLLTKYEDYAEMIDTVRECEVFPQGETADSRKVGVMVSRFKLHIRVVMSLLRERNMVQFELDPDCTKAGRAVLREATGFFYVESPPDRPGFSRVWMLAKVDVNRFVPGAIVDYAA…
CL2531Contig1	Esi0017_0197	361	hits with several species	other localisation	1	53335			9 exons, 5' and 3'-UTR	1.60883	-1.12282	1.02098	0.242252	0.283691	0.260329	MVQAFELSVAGCRVPQQQQQQQHFTSRFGRAAKLAFFWSFGFGGFPQQKIRAAFPRLGMAATEDALFRSIEGMQKAANKPWGKFLDAGTGTHSLKWINTLNTEGFTAVTADPQFAENTRKEIGFKVKTPDEIVVGNWRDEKFLEGRVFDTVLADYLVGAIDGFAPYYQDQVFERLKRHVAPGGRIYLVGMQPLPDHPGGAAELVCEAARLRDSCILLAGHRPYRQVLEYPLDWITRQMKKSGMVVTSAKKMPVLYAPHTVKRQLDVASRKLPIIAATDPKLAAALERHISDLDGRVRKELAGAGGRVEVGFDYVVAAELAREPAAGAERKEAVTPEGEGGGKWGGGGGGTVAAEATTAAAR
CL2423Contig1	Esi0088_0039	526	hits with several species	other localisation	5	PF02163	IPR006025	IPR001478	9 exons, 3'-UTR	1.95972	0.743855	0.705328	0.199143	0.215061	0.368125	MPPPARRPLARQATAAFLGAVVLCCGGGNKPMATAFVPSPLGGSGEVLLLPRASAAAPRLRSHRQQPLRQGKQLGGGGRCLSRLTPTASLTAAGAATTTAVATSVATGKAATAATTAAAATATAAATGGSAAAGNLALLASLGVLTTVITLHEVGHLVAALSQGIKVEAFSVGLGPKLLSYRAADGKGGLLKGKLSGPFSSPENVEEKIVEPEKKEVKKATSIWAWGKKKEEKKEEVVVEKKEPEGVEYALRALPVGGYVSFPNNYEVDEDGVVTELDDPDLLYNRGPFSRAIVVAAGVVVNFALAWACIFGSVTTGGIVQPHYQPGLLVNQLTDPKGGAAMAGIQPKDVLLTINGNSLAGDSTSVERAVKLIRASEGKPVAIEVAHQGSQPKTRMVQT…
LQ0AAB94YF15RM1.SCF	Esi0129_0046	1153	hits with several species	other localisation	4	PF09333			11 exons, 3'-UTR	-0.937792	3.68659	1.32471	2.17305	0.25032	0.523741	MFITVFNGVVDYMPQSQGPGCKRMPACTPGVASGAPTTGTLPPTEGRAVFPIGVLRVSSNMVAGAPMQGFKVVIRDIGLHMSNRVTDYSKEDAGLCRGALEAQRGPVVSPMKTEFSSVQEFLESSQFVQIATLNFLDAFLRTRSHVVAPSDAFTAVELWMGIVHVYTCHDSLSTCQALLGEWWALVSEVRPAAVVPADVGNTNSPAPKRQAGRVSHGEAKQSAPKSLLDGVEQDAFLPGSSRGSSGVAQGKPPPGLMDSPRYPGQPRKQSLVIEDFYCVSVEPPPPQTGTSALQVDALDNDSLNSPPPPGQGSSFLSEGEGPAQWLAAPKIDQDHGEGLSMEMADDTSDSEGEGEGEAKAVESGPLQPVTRRSTFGFSLPAPIEIELEDRHDAGISEEK…
CL4995Contig1	Esi0343_0032	240	hits with several species	chloroplast	2				6 exons, 5' and 3'-UTR	-1.09338	1.32783	-1.86566	0.748213	0.210928	0.382993	MKAVDTTIALFTLAALSPAAAFVPSAASRAALGRTRALPQKSQPTCAPADKSSAVFHSGKGASALFGTGPSYTDVVSETEGDEDGDEEGGKKKKKKKDKKSGGDKEKVKLEAEVTFFEGGPDPSEVVAPAVSILTVIGIVPFSAALARQAWVKYTLTSRRIKIVSGWNGKDTTEVVYPDIVDMVYVWRFFGRCGDLVLTLRDGSKLEIRSLPDFERNYNYIRERTSASCQEKSAVLKPQN
LQ0AAB75YI16FM1.SCF	Esi0431_0003	104	hits with several species	signal peptide	2				6 exons, 5' and 3'-UTR	1.0947	-0.598733	0.23773	0.178207	0.834978	0.1891	MSNKLVVAVTLMVVMIAINKSFAGIVVAKLPFVPISLVQKISHRALEGEDPTDCSVAFIFALCQAGVKGNIVKLVGVGHPKGMKEANPFAELGAPVEEDHAKVQ
LQ0AAB45YD05FM1.SCF	Esi0175_0008	363	hits only with heterokonts and green lineage		0	PF04177	IPR007304		9 exons, 5' and 3'-UTR	1.28714	0.0843654	0.526864	0.0650502	0.343866	0.253225	MSTPLPSTLEGLLLEGQRLYTKVSNADFDGDEDRDYTTARAKAALESLQMGVAREGVFSANEEVGEIATPVLPLLATDFYLGSLMIKLPFTNPQIRLKVLEQAEALLFKYLDTCERLQLFDAADLQAWQAMLKEAERSTSGDRQAITREQKIERFRRQQRTQQKMKEIEELLRTEGKDCEDEGEGDGMKRERSLLLLAGLASEALDGVSGMSKETEMLKHLVKAREQEGAGPDGQHARARRDEDDSIRSNGLEVTHISRVGGNLQIRKEDVRANVFKPTVALPTMTVEEFGEIELERATERTQQEAAAQKDSSSTRRRYDQLEMDGDEDDEDLVEQAAYHDRAWDDWKAENPRGAGNKANKII
CL5049Contig1	Esi0057_0106	562	hits only with heterokonts and ostreococcus	signal anchor	2				13 exons, 3'-UTR	2.12988	0.499479	-0.950117	0.359518	0.470465	1.22567	MPPASRGRTAPPRPSGAGGFLPRFVAGAGRLNRRGEPGRAGSGGWGRLALAGLVLVLVVAFATRPLGRQPDAGSIGFTKPKLDHPTMPVRDGGSRFSQHGLLGNRNNIETETASGGGSADGGDALSGEGGSADGSKEGSDNDGADDAWGSDGAGLGPGAPGFPLGEDDIHVVFSSDCTNYQAWQAVVLFHSAILSGHTGPITQLISGCSDEEQAEAESRHEVVRHSPKHKLFFTPGFVTKNPETGEPYPYMNKPNAMQIWLDQTEVEETIVALIDPDFIFLKPLTTWLSPTETVVKGDGLSLEGLKLENGGWVRKGYPAGQRFGLPNWTHWDLSNICPDDALCATTSTTAAKRYYDLIPPYLAHQDDWRRLLPEWVAQAPKVYEMYPSLLAEQTAYATA…
CL1747Contig1	Esi0366_0006	208	hits with several species	other localisation	1	IPR000449	PF00627	IPR009060	2 exons, 3'-UTR	3.24285	-1.27389	2.55133	0.344873	1.55153	0.363577	MPTFYFYTKTSDVDFLFGLDMLKRHLCVIDLKSSMLGLGSAGASVPFLSEKDLPSSARETQASRYCRIRCCCRCCCWLSALAPDGADRSVSLSYNHRVAEDLENKKPAAAESSGSSSSVETAPTGAGAGSAAPASSAMDTETPATASPASASATPAAATASAAGGAEEAKVTQLTAMGFSREQAEGALSSTGGDAEQAAGLLLAQMDL
LQ0AAB22YH04FM1.SCF	Esi0345_0022	99	hits with several species	other localisation	1	54495	PF00179	IPR000608	3 exons, 5' and 3'-UTR	2.76008	2.87858	2.35203	1.12126	0.459226	0.34407	MTASVAERRIKKELQKLKKAGDETAPLHPHIYTNGHICLSILYDEWSPALTIQSVCLSILSMLSSCTVKEKPSDNDAYVRKIGRGSPKTTIWAFHDDTV
LQ0ABA1YO18FM1.SCF	Esi0345_0022	99	hits with several species	other localisation	1	54495	PF00179	IPR000608	3 exons, 5' and 3'-UTR	2.10953	2.2723	2.94138	0.535529	0.901169	0.250324	MTASVAERRIKKELQKLKKAGDETAPLHPHIYTNGHICLSILYDEWSPALTIQSVCLSILSMLSSCTVKEKPSDNDAYVRKIGRGSPKTTIWAFHDDTV
LQ0AAB45YN19FM1.SCF	Esi0297_0004	256	hits only with diatoms sequences	other localisation	0				5 exons, 5'-UTR	-6.18641	-1.71169	-4.45853	0.735171	1.59594	1.01997	MRHRASAISEQRDRCATLTMGAAGKKRKKMEKDALKYADGINKNVARETQKEADVIAERLLKTCAEPKRDLTKIAAEIADLRSRTSALKPAQSYELGKDWRLVFASDDDAISVVGTGLHKLPLTRMQDFFITLEGGSNTARNIVTIEVLRVIGPFPNLRNTLSGGCKSTGAGSLNIRYTSMIDGTGKETGGSQTGEQDRVVDVDVAFVGQGVLVLESVSAKSKKPLSLVFAKEPDLEGELAKLRVAGDKKDDKKKK
LQ0AAB79YP18FM1.SCF	Esi0320_0026	281	hits only with diatoms sequences	other localisation	0				8 exons, 3'-UTR	-5.96117	0.228582	-2.12817	0.686469	0.708275	1.45152	MSDSAGMDTIINDLKEAPDVEVLTLKVSKCVQQVAQPAFFLRLAELAETAEDEQQRVKLENLATQVTSVLERLVEFAEEKMDDSSSLLQIVVTSAAEKNGEFLVPLSEERLTALRQSMKIHRDQLDNNFLATVQAWMEKSGKEEEMQGMVVILQKILQMYASQEILLGSAEPSATGEAGEADAAAPKKRTPAQLLLEEILNMDADKWDGVLAGLSAVGRGMTGGVTKDGLLGAIQVAVERVILQQENGSMAQRVQAEFLSELCKRIEAACPEQPLGPGMLE
CL3029Contig1	Esi0019_0063	419	hits only with diatoms sequences	signal peptide	4				6 exons, 5' and 3'-UTR	-4.57955	0.0431535	-1.53541	3.00462	0.313056	0.166564	MNSWWVYVLYALATCESLARAFVCVVSPTSVTKEHVSRDGSQLMCTARGVDHLEKQRIQAATTAAGGGLVKTASLERVMEGLGENEKYNAVLQGVSSIVMGKKKVGDAARGAFEEVFQLLDEMHANRIKCSIRTASAVVDAATATTDIGIITKVFSKIRRAGVGQKFSRDLGRLSLLPTEASKKEKALRGLVPVPDDDRAQEIGYAASFMVLVGSDFSWEGIGQVMHYDTTIPTVIGAVTAAAVGIDVWKRSGCTSKMVLNGMNRLFLKDVERESRAEAGAFLTAYMTGLPCFAFQPSAVEALRMAADPDMKETFLNGNGVHRILVWLLAGVAGEGLVHRQMIASDPRQAFAFLQMVRNREDGFELDPEDDSERVQWAFNEARALLKDNEGAFEALRRR…
CL4697Contig1	Esi0098_0050	303	hits only with diatoms sequences	other localisation	3				5 exons, no UTR	-2.98157	0.8721	-1.10713	0.34854	0.774516	0.776463	MALASCFRRVQPTKSSCKAVVVLALCCRVVALAPSAFHPTRINTPSIAPLSAYKWKHAQQQQPRMLADMDSRAGFLRTAAAAAIGGAALVVCGGSQPSSAAEVAATEFVDFEDSRGLFSCRIPKNFLRAERAKDKRGTVFVAGDYSKAEVLSVQVVKTFDLLTDAGLPTIGDLTKWENVGKPAAIADLLKQRRDSDAAGGTPVESVVLPGVTLDGDVLQFMLKSPIKVMRADLLEKEQGVSELYRNTYVKAIMRGDGSFLVVWAGALNTDWDQEGGAKDRLKVATDSFRLEGLIVDGVRLGAV
CL7724Contig1	Esi0152_0045	434	hits only with heterokonts	signal peptide	3				7 exons, 5' and 3'-UTR	-6.535	-2.19522	-7.59458	1.648	3.09956	0.193023	MSPSPFQLRCALLVLAAVTRAAVASYDDIAGYTPVSDVVEHSELDLDMQELEEGADLQTDAGFAAAYTAYSVGGNSEKTDSIRTIQGFSTGAQEKLSGEKWFDVYEAYWGSTDYADQFTSGACNGTEQFDDASVETRAEGCVKGAQYQNVWMYVIHELEDAIEDCDIGNLNANDGGPHAWDEGWGFYAGSLEGTEGTGDGVMLYALAEKRCENFATCTADDDGSDITGTAQVNSDMLELYKEGQVYLLDGDCGAAGDVKDKIIDLMGVPLVQGMLRYFYNADPEAGDGGDKAAAELWAFSAAMLPRINECDEEVATLVRANTDIASADAPMSEGYVFLKEQLESVYSCMGISCSQVGGLVIGESTTYYDGFEPCGDSDSGLSQIALGFIIAAGAVVLAV…
CL4335Contig1	Esi0124_0046	301	hits only with thalassiosira	other localisation	2				1 exon, 5' and 3'-UTR	-4.36736	-2.70544	-4.05956	0.102666	1.2404	0.594702	MLRFQSNEQKTFSEILEASARETNDILSQRRKVMDQAWADIDEGWQALQEHMAKIGITKPLDLKEGLVKLNVGGSLLAFRRSVFEGKGKGATSALGSLCEAEWDKRIPRDSDGRIVLDESPTCVKRLFHDLLTPPSLAKGTVVREDNFASDETPDLLRYTAHVLGLSWHLAPIGMSITGGTTIFEPHEASRLTAVIQGWCPGHPGRLELLYRASRDGWNSAAFQATCGDDRPSTVTFFRVKGQGTGGTDSIVGGFSSVPWTPPGGSTGYTASPGAFLFMLKDAGKRIGSACSTMHAMSTIW
CL2951Contig1	Esi0383_0007	433	hits with several species	other localisation	4				6 exons, 5' and 3'-UTR	1.97543	2.17806	1.18539	0.0681836	0.257713	0.242889	MVDEVRHRGKAPPFSFPGRAAEAATANANAKEQQHKRAVEKKSGASSNNNNNPQAEHRSASSMPAATAGQRGKKVSALINRGVEWETWLVGLQHKLLLGVAPTEDVVGPPLGKKRERNDSGNNNVACGCGWGNTVASAPSRSGQQQQQRSSGCKRCGRKRYLYRMVAAAADISERASFHRGFLCWTYASRLLAAGFFFLVAVYLNALATMVATHRNPYAMLLDRSGEPLGAHTLPDLGHDLWALLLNRLGHHTDYIDEHALPDRMVSFAGMVGDLFILCHPQRLKIMRRVFIIFGTVLMMRAVSVSVTVLPDASPVCRERFEEDAAIAELFPGAFLEAARFVWSPTSFVTCGDMVFSGHTTCLVMVAMTFRRYCRASELQTKVLLRGFHLSEGVLSAVR…
CL3755Contig1	Esi0320_0027	186	hits only with phytophtora	other localisation	4				4 exons, 3'-UTR	3.11179	-1.2971	1.09868	0.375229	0.2859	0.370786	MQSQDPMDNIRAAVEHADKNPSKVVSYSWYLVLIFAAVDVLVALINASTNDSSANGSHAASFASVWTLFMVLGVSVAGTVILKKYHTPLAVGTLLGLTTMMSQFMFVLFAVFLALAEYADEPGLATGDRTMAVFSFFLFLLYGLFSFVLGRYRTTVMNTPGTASSNDEGEWQDEPGTDGMAPGTPV
LQ0AAB83YA04RM1.SCF	Esi0319_0026	234	hits only with diatoms	chloroplast	2				4 exons, 5' and 3'-UTR	-0.39201	2.10773	-0.438675	0.605656	0.0245459	0.430976	MGVWYAFRSGVLVAAAAAAVASPAEAFITSFGGGGSKMLRVGQRHQPSFKSSGSCSRQRRADLDMKYVPDGLSPEQWKKMQKEEAEKKKKMGDLGQVGVKSFKSRSLQAWQEDGAGHLFPVDPKKVKSGEIPPEKTPYMQRKGAWDNSDLAKKNLQKKWSATDKAYAAKETATGGGEGGGGGQEGGRRQEEGAEGAEAQPRRCRKEEGDFRSWVDHKPLGSYGGGTKGGGGGGT
CL982Contig1	Esi0002_0193	844	mostly phytophtora	other localisation	2	IPR003593	IPR003960	IPR001984	12 exons, 3'-UTR	2.10794	1.20523	2.79856	0.413644	0.281698	0.307379	MKVLDLAKIAVSESILGRLSTGNPWIDTVVAAVIPIAMRFFLPAGTYKPISGHLALDAFLLASVPLLRTKRRSLQEWLRTCGLNLFYNVNNTYETTVRFQKESKNVMYAPEEAGSEDSEEGKRNNILQKAILLYVGHLGLEYRRSQALLTAIKQKPSARGHGGIDRYGRAKQAKVFGGTAEQLRCFSISIAPPEDVWVLVDEENGVWFKQAKAVHSGGGGRDGSSPDRDTVTTIEYDFRCDRQGGNAKVKDFIQRAYEWYTDEMKSTEDHSRYMYSLIAQPEPARSRLGIGGVEFPGMNGDGRGRSPLDPSPLRYKRYRLGDVKDFDSLFFPEKEKLLRALENFEAKRGRYAIRGYPHKLGLLLHGPPGTGKTSLIKALACRTGRHIIQVPLGRVNTNQ…
CL2657Contig1	Esi0046_0005	471	only diatoms	other localisation	5				9 exons, 3'-UTR	-1.88176	2.67909	-1.15081	0.818425	0.166998	0.961663	MVVQQHRCWGLSFLAVYGWIARVKPSAALVVSSTSTSSMMMMLPSSPRMTMMVSGTGSRQAPVQLPSGRFAACWPVGLGQYNGGPAVFLANKRRILDPREEVLPIPIPEEAAPLLSEAMQPRDVSVAVLLRTCSPLFGRNGGMYDNIPWEWSGDDMAKREAFQRSQGKGMMDMGAIVGGGGGGGGGGDSVTQQQTQAFGSAYGLLADVATTLCPADILSLFVEEEESGAGGITLGASAYLRRRPDAEGRGGQRSIIEVTTDEAVGVALALGRQVYVDEEIWEGGRVRVKFVMDGDKMRLDLDNVEGRDLSSTSDKEAPPVQPPAWTIKSRGALSRMSVEEKRECLRATGVRPPRKRALSESEDPDRDLEDLMLPRMDEAVRRDVLMARAWREGDFATAG…
LQ0ACA3YL04RM1.SCF	Esi0403_0020	118	most hits with phytophtora	other localisation	0	IPR001214	82199		4 exons, 3'-UTR	-0.0504953	2.9896	0.760443	0.530393	0.456534	1.57506	MGHHTCCLFRCATCRSPNKSYLMRLGPQVYVDALDHPEVMARYINDCRNSWLYNVAFRKLPQESKALVVALKDIQPGQEIFVDYGRWYWLSLKPTKLGDDGSATARLEPRPPDVSREH
CL4054Contig1	Esi0038_0107	799	hist only with phytophtora	other localisation	3	48464	IPR006569		3 exons, 3'-UTR	-0.518024	1.74929	0.492264	0.689326	0.279864	0.236998	MGKVTLEEYIDLFRGKAEQMGEFPDKIIINALTGTAKRHRTDKAQAIATVLQNMLMDPSHPAKHKLPICFLVDSLVKNITDPFADLFENGLTRWFCSAYDAVDEKSKKHLGRVVATWEVQSIFSADKRKEIQRYMLNAKPAAASLSSSSPSPPPAATTASTSAAVTVTTVPPPLPTVAPYQPPQPQAPPAAPVAAAAAPLPPPLPPLPPASAVAAPVAAPVAAPVAAPVAASVAAPVAAPVAPDIQAMVDSRMKQLLDQQLLELGESSTMSLDDLWRTNAELASGFRLVAQAQVHEQLGLPPPPPPPAIIIGPLQQQQQQPPPPHQTAPPLPQVPHQQQPLQQPQPQQQQQQPPRSQPQLSIQLPLGTPPPWAAKAPPSQDFGRAVQVANEVAAGARVA…
CL4916Contig1	Esi0075_0084	1001	only phytophtora	other localisation	1	57850			9 exons, 3'-UTR	-1.07971	-1.83269	1.23706	0.389731	1.08622	0.154121	MAMIASGLAPATPPSATTATAITTQGSPANIKSSTNGGDNSVASSTCNAQRLEIFRASLERYISGHEIDPSLCYIALEAAIANPGIGQAAQESRDELMVLLMSCVEDSERRANLHIRFIRSNPMVVTQCCKSLHCYPCRVVGGHHPQTCEQYEAGRGHQDVCKCPGCGVYVVKGDGCDSISCICGHDFSWSELVAARHRRIADAFRDAHPEDTGRAAAQIIRRGPPTAADLGAGPQEDINEHVGARGDIEEQQQQGHEYPLDAPAATAAGTEGGESEQGEDGEEGQPATSGAWGEPVEHWEPVEDGAWGQRWVPGVEQGPGAADAWQPNQRPAQELERAPLHGTGQATIEEERDEPVPVPEENGRLSAEDEFRLANAYAEAYPRELARGRAVIYGEENP…
LQ0AGA1YC03RM1.SCF	Esi0094_0043	151	only phytophtora	signal peptide	4	IPR001304			6 exons, 3'-UTR	2.04153	-1.29863	1.30407	0.236256	1.44486	0.387772	MLTLVSFAASSSVSLLSAVILSTSWLFLLGLRLHSLALKEITGSIHVAVCFLFPYCFQYLVSAIDEWAPHWLPACLWYSFLMQMFCTSNHQYKVFALATCGSSASLQYGQVLVSLASLHAVSMVDVMLNSRFYHARYRAGMSLTNGFRTVP
LQ0AAB32YK15FM1.SCF	Esi0143_0044	265	only hits with heterokonts	signal peptide	1				5 exons, 5' and 3'-UTR	1.09832	-0.0664114	0.618645	0.140797	0.38644	0.202793	MANGRRNSRRRATCSWRRAVAVTAAGVLALGRRGAVADVCVLSSGKTDVTIGEETSVCLVVNGLGWEVDADLTFYSQVLILPDADEFSRFSVKGSWNASRVIEDDPILTTFGTEVGVHVESMGKYSFQKAFRLREEEKTFPLHTAIISVDEGEVTGISWDDGCHFCGSSQCEDNTYDYTGQLIGGEGNGQDCYWPDSDCLQDGVEDQVSALCQLTVYVVWTGTDSKGNFFTSFAKRLSMYAGETVEGLISDAGDTYEDTIVPAVG
LQ0AFA6YI19RM1.SCF	Esi0063_0064	535	only hits with heterokonts	other localisation	3	IPR006785			7 exons, 3'-UTR	-1.91291	1.84366	-0.682727	1.67579	0.295597	0.502629	MKALASRAEQDSSSLLAARVGSHTSELRAELGTIKQLLLLQAGVEGGGAGTKSMRAISSVGAADAGEASRKATTDQSDMSAGVIGAGGGGEGAGSRSAEGLKGGADEQANGASVSGGLPVRDPEEDMAQEAADKAAAEAAALAATEGRKATARAALAALVADNSAQAAKDGMAMLRMLVANLVNQPNVPRYRRIATSNDNFKKRLLPLEGHRAMMEAVGFKPKGSLWEWTWHEDSTPSASSNNKAVLEDIVKAIDAVARPNGPPLSTASAATVVPPAATVAAPAAASAAAALTPPAPPPATNVTAGWSTRSSGDHGGGGTAVSEANGGARGSSRPSLVSDSGAVGAAGDGDAVKGSDGRPSSRGGGGSAPALGTRNDVLAAAAQVNGVGGDAGGASSRI…
CL6340Contig1	Esi0348_0009	159	one hit only thalassiosira	chloroplast	4	57802	IPR004039		2 exons, 5' and 3'-UTR	0.0964263	2.71939	0.122995	1.32738	0.202775	0.267514	MNQFFAFLVLCLAASVNGFVPAPAAFSKGQFASRAAASSQVARSSISPRTGVSSASNPGVGVMMMAAKAEEATRSFWEGEWVCADCGYIYDIDDCGGLYLEEQKRGFVCPQCRGPRRRFAKKVGNQVGITQDGGDAPILLFSFLGLWATVAFGYWFAGQ
