# Supplementary material for: Global expression analysis of the brown alga Ectocarpus siliculosus (Phaeophyceae) reveals large-scale reprogramming of the transcriptome in response to abiotic stress
Source: Genome Biol. 2009 Jun 16;10(6):R66. doi: 10.1186/gb-2009-10-6-r66 (PMC2718500; doi:10.1186/gb-2009-10-6-r66)
Supplement: Additional data file 7 — C5-epimerase-genes represented on the microarray and their expression profiles. [file gb-2009-10-6-r66-S7.xls]

## Sheet: C5_epimerases
		Log2-ratio with control			Standard deviation
Sequence	Genome ID	Hyposaline stress	Hypersaline stress	Oxidative stress	Hyposaline stress	Hypersaline stress	Oxidative stress
CL107Contig1	Esi0546_0003	-1.2317	-0.568446	-0.377939	0.609051	0.332026	0.439129
CL171Contig1	Esi0576_0012	1.62516	-2.57548	-0.641649	0.431382	1.34966	0.629349
CL197Contig1	Esi0106_0009	-4.57563	-1.42713	-2.67718	1.45423	0.299169	0.338997
CL2550Contig1	Esi0000_0625	-1.7551	-2.20847	-2.18808	2.10337	1.22637	1.05853
CL2754Contig1	Esi0010_0120	-1.01888	-2.10116	-0.298081	0.709584	0.197886	0.210327
CL31Contig1	Esi0010_0210	0.322656	-0.35287	-0.0207285	0.129396	0.116979	0.172769
CL3599Contig1	Esi0013_0168	-3.82649	-2.77237	-0.915163	0.457391	0.637668	0.30924
CL419Contig1	Esi0012_0076	-2.65449	-3.29264	-0.636112	1.68342	2.71207	0.442129
CL538Contig1	Esi1168_0001	0.784367	1.35402	0.583869	1.08451	0.543249	1.22043
CL5889Contig1	Esi0061_0068	-1.46016	-1.20585	-1.76309	1.08211	0.410656	0.331944
CL6585Contig1	Esi0013_0183	-2.9612	-1.11312	-0.0278881	1.10687	0.444005	0.373943
CL7663Contig1	Esi0277_0030	-2.19734	-1.81912	0.681659	0.332222	0.134405	0.666071
CL88Contig1	Esi0882_0001	0.609401	-0.370326	-0.750877	0.277289	0.101735	0.840276
CL922Contig1	Esi1541_0001	-4.24785	-4.04739	-1.8039	0.458523	0.796322	0.662034
LQ0AAB101YH10FM1.SCF	Esi0647_0001	-0.365712	-5.33279	-0.305178	2.51464	1.13403	1.36202
LQ0AAB11YN13FM1.SCF	Esi0061_0039	2.07215	2.50524	0.465043	0.275394	0.160612	0.352618
LQ0AAB34YG09FM1.SCF	Esi0127_0061	-4.67672	-1.75422	0.0934075	0.860294	1.84633	0.175733
LQ0AAB40YG02FM1.SCF	Esi0162_0034	1.87596	0.545301	4.73332	1.2191	0.465006	1.30906
LQ0AAB41YI12FM1.SCF	Esi0572_0001	-4.65255	-2.73893	-0.918684	0.214019	1.42714	1.42276
LQ0AAB45YC01FM1.SCF	Esi0096_0033	-1.44765	-1.44699	-0.83906	0.110088	0.718616	0.615853
LQ0AAB47YH17FM1.SCF	Esi0277_0035	-0.653186	0.99407	1.85313	0.433814	2.53579	0.93798
LQ0AAB6YP12FM1.SCF	Esi0013_0157	-3.62646	-3.03839	-2.66385	1.31632	0.910267	0.804491
LQ0AAB73YF04RM1.SCF	Esi0365_0024	-1.36086	0.718126	0.536971	1.65488	0.172171	0.595928
LQ0ACA19YP10RM1.SCF	Esi0184_0008	-0.424558	1.23722	-0.536919	0.522585	0.0625684	0.425948
