# Supplementary material for: Global expression analysis of the brown alga Ectocarpus siliculosus (Phaeophyceae) reveals large-scale reprogramming of the transcriptome in response to abiotic stress
Source: Genome Biol. 2009 Jun 16;10(6):R66. doi: 10.1186/gb-2009-10-6-r66 (PMC2718500; doi:10.1186/gb-2009-10-6-r66)
Supplement: Additional data file 8 — Accession numbers of all sequences used in the design of the Ectocarpus siliculosus microarray. [file gb-2009-10-6-r66-S8.xls]

## Sheet: Contigs_Singeltons
Sequence name	Accession number(s) of corresponding EST(s)
CL1Contig1	FP247963; FP284979; FP284897; FP278010; FP278027; FP250759; FP283258; FP277439; FP277780; FP285173; FP284267; FP279448; FP278392; FP284193; FP285566; FP295527; FP273513; FP296400; FP251818; FP274302; FP296035; FP289593; FP248364; FP290306; FP278505; FP296176; FP277974; FP254610; FP254738; FP279655; FP274019; FP247989; FP287242; FP281465; FP249169; FP279459; FP295844; FP296797; FP254622; FP281790;…
CL1Contig10	FP277732; FP280074; FP289496; FP250754; FP274359; FP281685; FP254814; FP252085; FP250973; FP275803; FP250870; FP252765; FP256387; FP298067; FP304192; FP302033; FP255241; FP302104; FP253433; FP280381; FP301393; FP309349; FP304599; FP308020; FP303076; FP299703; FP298753; FP298806; FP304160; FP259179; FP306194; FP310288; FP309564; FP304677; FP302830; FP304644; FP300782; FP307916; FP307845; FP285033;…
CL1Contig11	FP278002; FP256320; FP285323; FP280069; FP248277; FP277689; FP295922; FP295555; FP284169; FP273982; FP278521; FP271146; FP273554; FP273926; FP248943; FP278609; FP279490; FP273016; FP278506; FP280162; FP278470; FP278625; FP295002; FP280272; FP283206; FP292602; FP296055; FP250094; FP287023; FP274050; FP289868; FP294778; FP248998; FP278669; FP279187; FP281764; FP291236; FP287058; FP251663; FP257675;…
CL1Contig12	FP285564; FP282897; FP290450; FP252518; FP255940; FP282299; FP248305; FP249110; FP254525; FP247635; FP295511; FP280451; FP248400; FP291531; FP254566; FP255410; FP275482; FP275818; FP291952; FP296270; FP253335; FP276012; FP253180; FP285941; FP256800; FP252567; FP288315; FP296697; FP255758; FP290011; FP250424; FP262734; FP255773; FP257210; FP287602; FP275011; FP253307; FP294826; FP252517; FP279882;…
CL1Contig13	FP283147; FP285774; FP254799; FP296596; FP310243; FP285003; FP254734; FP307324; FP298622; FP286411; FP298786; FP291317; FP298038; FP305113; FP287625; FP252937; FP276382; FP275918; FP296642; FP290637; FP300435; FP294740; FP255698; FP257535; FP301951; FP296595; FP298820; FP308991; FP312041; FP299535; FP312040; FP299425; FP301388; FP301355; FP311220; FP302929; FP291678; FP309779; FP303505; FP311703;…
CL1Contig14	FP274196; FP291360; FP282655; FP252188; FP252478; FP274136; FP279012; FP279013; FP268155; FP273210; FP254719; FP286144; FP256845; FP294937; FP250054; FP254549; FP254512; FP256818; FP282656; FP293351; FP274137; FP283942; FP274197; FP291361; FP255008; FP288253; FP286393; FP285655; FP286486; FP252189; FP256516; FP252039;
CL1Contig15	FP249996; FP290012; FP251665; FP306663; FP300351; FP300004; FP301872; FP302734; FP303689; FP302571; FP306001; FP307173; FP301191; FP299039; FP304980; FP308071; FP298934; FP308198; FP308315; FP301975; FP301799; FP299009; FP310924; FP306244; FP311327; FP308165; FP300087; FP306891; FP311538; FP299557; FP306206; FP302761; FP304911; FP307716; FP302290; FP298938; FP301688; FP298358; FP309639; FP306423;…
CL1Contig16	FP285370; FP285434; FP293093; FP281190; FP249506; FP295277; FP307895; FP256385; FP279352; FP289924; FP302203; FP249948; FP275696; FP301165; FP273232; FP282470; FP256769; FP288177; FP291480; FP249652; FP252790; FP300456; FP309252; FP291479; FP307491; FP305668; FP307704; FP301608; FP299553; FP307492; FP299069; FP306534; FP305935; FP301150; FP308574; FP299110; FP301554; FP306800; FP281988; FP300614;…
CL1Contig17	FP277096; FP249339; FP248298; FP279727; FP249430; FP283076; FP297198; FP292333; FP275046; FP281244; FP255851; FP256040; FP289192; FP251509; FP297785; FP282342; FP273062; FP246560; FP281904; FP250253; FP301677; FP281243; FP283075; FP275045; FP288314; FP297197; FP282341; FP279726; FP273061; FP312440;
CL1Contig18	FP253865; FP310568; FP248803; FP252242; FP256169; FP295386; FP295385; FP288676; FP288675; FP277886; FP284302; FP254395; FP293968; FP256220; FP305835; FP297127; FP306228; FP300654; FP254773; FP311810; FP307785; FP309669; FP310819; FP310663; FP311065; FP297644; FP297128; FP251671; FP285482; FP254396; FP279331; FP250846; FP255232; FP274530; FP251516; FP279825; FP255366; FP256409; FP294452; FP252243;…
CL1Contig19	FP309169; FP305007; FP278842; FP276289; FP249690; FP306938; FP300661; FP276051; FP255694; FP305261; FP303762; FP307824; FP306348; FP311505; FP303743; FP305534; FP304232; FP302075; FP252686; FP302448; FP293214; FP302531; FP307497; FP301012; FP301501; FP309479; FP302511; FP301914; FP305802; FP306659; FP304453; FP259489; FP300494; FP306601; FP308269; FP303020; FP308021; FP300950; FP249689; FP304745;…
CL1Contig2	FP299818; FP273028; FP283650; FP312586; FP306713; FP279357; FP277718; FP273990; FP272898; FP257840; FP253443; FP253299; FP275709; FP279673; FP299369; FP249829; FP251963; FP296183; FP275610; FP299162; FP305692; FP306229; FP307023; FP307729; FP307768; FP274616; FP309631; FP256281; FP303182; FP301218; FP278343; FP312020; FP308603; FP304240; FP304398; FP303806; FP301182; FP300402; FP308875; FP305196;…
CL1Contig20	FP278339; FP282835; FP248234; FP278253; FP273128; FP274353; FP274558; FP248459; FP285578; FP274746; FP285227; FP277744; FP247936; FP284219; FP282389; FP281203; FP278655; FP281470; FP272964; FP297726; FP283414; FP248324; FP257706; FP293787; FP279823; FP253829; FP256259; FP295684; FP250260; FP274348; FP251822; FP254789; FP251882; FP273988; FP253503; FP249383; FP249198; FP295581; FP287370; FP286743;…
CL1Contig21	FP299428; FP286380; FP277104; FP285682; FP285681; FP281329; FP259118; FP293191; FP298424; FP247720; FP286016; FP311143; FP291799; FP311748; FP274199; FP300487; FP285240; FP276304; FP295265; FP289245; FP296553; FP283365; FP282749; FP296278; FP283388; FP251043; FP249995; FP287689; FP287341; FP281084; FP276066; FP311841; FP282564; FP296976; FP257688; FP281330; FP296501; FP288550; FP276082; FP276290;…
CL1Contig22	FP277845; FP284851; FP273014; FP278014; FP248543; FP283689; FP286446; FP282542; FP295321; FP254992; FP273720; FP289691; FP252594; FP251409; FP275893; FP256601; FP256608; FP257409; FP255901; FP253905; FP252564; FP279449; FP282222; FP275917; FP256798; FP276312; FP273809; FP290164; FP297090; FP287586; FP297463; FP310249; FP306795; FP306198; FP304767; FP282541; FP278013; FP280890; FP300777; FP309506;…
CL1Contig23	FP273585; FP251162; FP288094; FP304608; FP291386; FP287262; FP294742; FP303229; FP252128; FP253912; FP310988; FP303509; FP309840; FP300281; FP300228; FP300187; FP300479; FP307758; FP303667; FP301344; FP298584; FP299824; FP298735; FP308515; FP298851; FP300648; FP298793; FP303040; FP301842; FP307788; FP309006;
CL1Contig24	FP274043; FP279392; FP295809; FP248521; FP272891; FP250978; FP300663; FP304110; FP280100; FP308812; FP304107; FP298425; FP306318; FP302307; FP306196; FP309940; FP299498; FP300919; FP299275; FP303415; FP299938; FP300581; FP308816; FP306420; FP303115; FP299620; FP304336; FP307989; FP302989; FP301318; FP298714; FP298393; FP306510; FP299224; FP298892; FP303684; FP303449; FP304374; FP301858; FP300821;…
CL1Contig25	FP283198; FP285117; FP283123; FP280951; FP279595; FP301201; FP248159; FP279891; FP277220; FP256344; FP283470; FP273348; FP295066; FP286807; FP296832; FP290627; FP280994; FP282873; FP286243; FP296277; FP283011; FP273353; FP281798; FP287131; FP256354; FP292711; FP303328; FP255597; FP255342; FP275005; FP301060; FP288978; FP254256; FP254001; FP257358; FP278117; FP287618; FP292335; FP283970; FP299222;…
CL1Contig26	FP284237; FP284175; FP290486; FP289105; FP288420; FP294829; FP294828; FP284236; FP284174; FP290485; FP292906;
CL1Contig27	FP283816; FP274683; FP296652; FP280463; FP293723; FP293716; FP298907; FP259414; FP298966; FP288194; FP307355; FP275715; FP305796; FP303524; FP299855; FP283815; FP274682; FP280462; FP304573; FP307219; FP293722; FP304217; FP305524; FP300898; FP300506; FP307218; FP303680; FP302543; FP299774; FP304033; FP298751; FP285997; FP308830; FP307354; FP305260;
CL1Contig28	FP283692; FP290014; FP309131; FP300089; FP283225; FP308031; FP302445; FP299059;
CL1Contig29	FP277539; FP247846; FP289321; FP273114; FP281693; FP283301; FP281759; FP294470; FP249495; FP252542; FP286419; FP278596; FP289455; FP281920; FP286919; FP279540; FP295064; FP297721; FP255024; FP276263; FP252230; FP280345; FP275975; FP275488; FP280246; FP277601; FP254857; FP283709; FP273278; FP293707; FP286206; FP283549; FP309102; FP280144; FP257406; FP275266; FP279539; FP286918; FP281758; FP310121;…
CL1Contig3	FP285377; FP278488; FP278793; FP278541; FP285809; FP278710; FP247701; FP290243; FP291255; FP281834; FP291253; FP288126; FP292905; FP295456; FP257701; FP251894; FP291487; FP250413; FP291527; FP290097; FP253054; FP251051; FP256030; FP253664; FP252090; FP292949; FP291776; FP257008; FP252412; FP307310; FP290242; FP308892; FP291252; FP267955; FP291775; FP307481; FP278792; FP252411; FP281833; FP305536;…
CL1Contig30	FP286075; FP281608; FP304265; FP298479; FP276494; FP300646; FP300321; FP308777; FP307169; FP301041; FP309350; FP300982; FP298973; FP306653; FP304470; FP308053; FP301398; FP305457; FP303396;
CL1Contig31	FP257821; FP294019; FP273751; FP257458; FP292971; FP299782; FP301708; FP308860; FP300397; FP306280; FP305305; FP300416; FP300007; FP309567; FP305276; FP305326; FP307664; FP303267; FP309846; FP300623; FP300289; FP302952; FP309855; FP306569; FP306541; FP304758; FP299379; FP299801; FP300672; FP301993; FP305526; FP307008; FP302573; FP298705; FP300836; FP308281; FP304964; FP302510; FP305858; FP299290;…
CL1Contig32	FP293556; FP279128; FP254209; FP291947;
CL1Contig33	FP277540; FP304299; FP247627; FP306603; FP293304; FP290233; FP292052; FP306522; FP275092; FP308874; FP302850; FP300298; FP310652; FP303819; FP257390; FP260082; FP304055; FP299193; FP260007; FP300310; FP308097; FP299700; FP301898; FP308648; FP307742; FP308051; FP309293; FP310899; FP309638; FP298717; FP308982; FP298797; FP304284; FP308638; FP311850; FP303086; FP304432; FP299637; FP308112; FP275091;…
CL1Contig34	FP248327; FP278208; FP284998; FP284420; FP279770; FP278725; FP280470; FP247926; FP290788; FP249659; FP248787; FP279169; FP295710; FP274567; FP310674; FP310445; FP247767; FP301014; FP309152; FP256928; FP285953; FP290341; FP296669; FP290117; FP290155; FP286850; FP310219; FP298507; FP310058; FP309941; FP280367; FP252916; FP289249; FP254808; FP253737; FP257767; FP250579; FP279978; FP255891; FP290655;…
CL1Contig35	FP295214; FP287352; FP248583; FP276014; FP251623; FP274691; FP250861; FP251380; FP293720; FP254467; FP286514; FP255135; FP291730; FP309769; FP253343; FP304174; FP300905; FP301026; FP298776; FP255383; FP293545; FP308449; FP300834; FP300344; FP301807; FP311807; FP301565; FP293719; FP309903; FP291729; FP304429; FP304569; FP299760; FP309218; FP303394; FP310499;
CL1Contig36	FP302625; FP304354; FP283226; FP298490; FP303085; FP282801; FP254715; FP283693; FP290015; FP290823; FP303463;
CL1Contig37	FP302229; FP303826; FP307810; FP304231; FP307962; FP309058; FP299928; FP300586; FP303410; FP280119; FP303163; FP304784; FP289895; FP309868; FP300375; FP309271; FP304749; FP301404; FP301573; FP309443; FP306038; FP309177; FP306246; FP309681; FP308722; FP309411; FP309230; FP306650; FP300664; FP303987; FP287138; FP300891; FP299026; FP259095; FP288774; FP279020; FP308190; FP306638;
CL1Contig38	FP309241; FP303763; FP298880; FP302310; FP303253; FP303848; FP301578; FP304360; FP303292; FP303053; FP303327; FP299113; FP305974; FP304929; FP299188; FP306743; FP306979; FP299061; FP301377; FP302419; FP307211; FP301168; FP305809; FP258465; FP301157; FP301831; FP304413; FP309191; FP307370; FP305688; FP305208; FP300994; FP309771; FP298766; FP308905; FP304075; FP300819; FP298587; FP302596; FP309802;…
CL1Contig39	FP303600; FP303618;
CL1Contig4	FP247781; FP283906; FP278410; FP287475; FP257437; FP281989; FP300727; FP298954; FP279613; FP302134; FP303067; FP300205; FP302926; FP301786; FP309997; FP305105; FP300740; FP299165; FP309966; FP301943; FP308416; FP304333; FP301532; FP298868; FP309002; FP309746; FP307323; FP299543; FP299869; FP302572; FP299909; FP259510; FP303092; FP305814; FP301662; FP301175; FP303103; FP301538; FP310010; FP309928;
CL1Contig40	FP285002; FP308772; FP299794; FP310745; FP302391; FP303744; FP298913; FP302932; FP302490; FP298878; FP277594; FP304910; FP308438; FP305955; FP259918; FP301620; FP311089; FP310131; FP304959; FP301882; FP304366; FP302632; FP298861; FP304002; FP302236; FP304505; FP298794; FP301703; FP305043; FP303940; FP312097; FP305078; FP290712; FP300940; FP302279; FP306947; FP307015; FP312096; FP298166; FP303678;…
CL1Contig41	FP305908; FP303716; FP307631; FP304307; FP307744; FP299596; FP306292; FP301828; FP300029; FP304545; FP307557; FP307632;
CL1Contig42	FP306760; FP301741; FP310608; FP308193; FP303791; FP308942; FP299784; FP300235; FP305059; FP303770; FP306573; FP310810; FP307178; FP301818; FP308570; FP311802; FP300504; FP303264; FP305052;
CL1Contig43	FP301477; FP301651;
CL1Contig44	FP299056; FP308517; FP301572; FP307162; FP307161; FP300712; FP303641; FP255115; FP309719; FP259988; FP309304; FP300606; FP300806; FP301148;
CL1Contig45	FP310067; FP300516; FP306378; FP304065; FP299689; FP259076; FP302658; FP299252; FP304772; FP304744; FP307222; FP306749; FP304567; FP306651; FP308697;
CL1Contig46	FP306471; FP305859; FP300447; FP298464; FP274834; FP300419; FP300011; FP298378; FP309455; FP301655; FP255971; FP311307; FP302145; FP311192; FP300547; FP305345; FP304011; FP300263; FP302158; FP308375; FP304244; FP302722; FP308835; FP305175; FP305662; FP304000; FP309853; FP250793; FP299064; FP307959; FP305503; FP308010; FP250858; FP307743; FP300080; FP301396; FP312046; FP308767; FP308248; FP302244;…
CL1Contig47	FP298566; FP311503; FP306385; FP299259; FP299238; FP306052; FP306973; FP306710; FP305738; FP309847; FP306553; FP299944; FP303246; FP305963;
CL1Contig48	FP299717; FP298769;
CL1Contig49	FP307562; FP300337; FP299522; FP306262; FP305466; FP288775; FP308511; FP310092; FP308158; FP256295; FP291240; FP299088; FP300142; FP300640; FP308631; FP301187; FP277896; FP304442; FP300675; FP303593; FP301425; FP309256; FP299930; FP298135; FP281794; FP293374; FP256209; FP306666; FP279021; FP276019; FP289896; FP293767; FP293899; FP249431; FP309487;
CL1Contig5	FP300003; FP251211; FP256263; FP293916; FP278406; FP294954; FP248224; FP312380; FP296514; FP274785; FP301062; FP299628; FP295911; FP272922; FP288828; FP296778; FP274101; FP292024; FP289408; FP297621; FP298124; FP274816; FP295201; FP257023; FP253811; FP253209; FP307155; FP289051; FP276329; FP296662; FP253087; FP297598; FP276034; FP257211; FP254707; FP278886; FP287075; FP311005; FP305691; FP310247;…
CL1Contig50	FP279045; FP312526; FP309083; FP307151; FP248464; FP299066; FP311201; FP305917; FP310094; FP299516; FP308641; FP298959; FP299754; FP308743; FP308577; FP258881; FP303227; FP308500; FP304301; FP303190; FP300527; FP260106; FP305346; FP303357; FP303735; FP302737; FP307576; FP307577; FP309838; FP306829; FP304774; FP303066; FP299427; FP298449; FP307598; FP303166; FP303776; FP309070; FP306028; FP298831;…
CL1Contig51	FP309860; FP304896;
CL1Contig52	FP303829; FP302121; FP259806; FP302394; FP259043; FP306733; FP258580; FP300992; FP300198; FP300736; FP299694; FP304863; FP303249; FP298952; FP299221; FP309100; FP303140; FP305745; FP298718; FP298998; FP299991; FP301190; FP300248; FP306529; FP299431; FP302454; FP299106; FP299888; FP308355; FP302488; FP301029; FP309447; FP308911; FP302453; FP299432; FP299942; FP299799; FP305666; FP309708; FP306655;…
CL1Contig53	FP308793; FP306291;
CL1Contig54	FP305092; FP302815; FP307168; FP305020; FP310500; FP307167; FP310932; FP299441; FP311193;
CL1Contig55	FP306769; FP300573;
CL1Contig56	FP277595; FP249626; FP300401; FP252867; FP305893; FP273730; FP257581; FP302772; FP255003; FP300448; FP304588; FP307753; FP298499; FP303118; FP299213; FP305909; FP303535; FP302373; FP307060; FP300605; FP256196; FP302220; FP300308; FP312492; FP308310; FP302697; FP292032; FP303894; FP301339; FP282469; FP259292; FP308354; FP306791; FP299607; FP308477; FP292031; FP279351; FP303633; FP300060; FP305327;…
CL1Contig6	FP277119; FP284424; FP278280; FP278633; FP285376; FP248451; FP286877; FP278310; FP290391; FP283880; FP290384; FP292178; FP292200; FP275802; FP279343; FP281837; FP249034; FP253332; FP256583; FP250559; FP274996; FP257501; FP255620; FP255633; FP257034; FP275396; FP250332; FP249775; FP278334; FP253879; FP295821; FP293273; FP250750; FP297847; FP301696; FP300846; FP292177; FP302634; FP250261; FP297953;…
CL1Contig7	FP252287; FP256535; FP301861; FP249994; FP256514; FP251361; FP256552; FP251980; FP256001; FP272967; FP296614; FP257047; FP252288; FP257359; FP256879; FP273260;
CL1Contig8	FP284405; FP277542; FP284027; FP284271; FP274639; FP284053; FP286279; FP287337; FP251789; FP251830; FP290250; FP282955; FP288841; FP278918; FP298084; FP290272; FP279893; FP282670; FP251771; FP292667; FP288165; FP252273; FP256366; FP257600; FP291515; FP297553; FP256114; FP252829; FP279356; FP256140; FP291885; FP291821; FP294574; FP283163; FP252955; FP282499; FP255983; FP297391; FP274740; FP257865;…
CL1Contig9	FP255034; FP277387; FP301303; FP254968; FP248732; FP277918; FP252422; FP254970; FP307221; FP254996; FP301517; FP308131; FP303310; FP300960; FP301313; FP308859; FP301019; FP310346; FP302623; FP302323; FP301879; FP309423; FP302688; FP308302; FP305931; FP306125; FP300325; FP302019; FP304222; FP299737; FP308093; FP299265; FP302475; FP300541; FP309545; FP300176; FP298771; FP308955; FP309164; FP301667;…
CL5125Contig1	FP259943; FP259088;
CL5129Contig1	FP248048; FP267186;
CL5133Contig1	FP251651; FP250603;
CL5137Contig1	FP278131; FP293010;
CL5141Contig1	FP263585; FP265204;
CL5145Contig1	FP284034; FP287234;
CL5148Contig1	FP261689; FP284784;
CL5153Contig1	FP296846; FP311252;
CL5157Contig1	FP272624; FP292033;
CL5161Contig1	FP248508; FP267080;
CL5165Contig1	FP265654; FP309565;
CL5169Contig1	FP246144; FP266494;
CL5173Contig1	FP246856; FP265395;
CL5177Contig1	FP278562; FP305115;
CL5182Contig1	FP263352; FP289930;
CL5186Contig1	FP284711; FP295940;
CL5190Contig1	FP256525; FP271954;
CL5195Contig1	FP269701; FP283842;
CL5199Contig1	FP310368; FP291836;
CL5202Contig1	FP248496; FP246419;
CL5207Contig1	FP308862; FP306586;
CL5210Contig1	FP248377; FP262741;
CL5214Contig1	FP248983; FP249810;
CL5218Contig1	FP264903; FP267529;
CL5222Contig1	FP265823; FP276890;
CL5227Contig1	FP246880; FP266249;
CL5232Contig1	FP250774; FP267675;
CL5236Contig1	FP258534; FP258370;
CL5238Contig1	FP269704; FP271534;
CL5242Contig1	FP300724; FP299726;
CL5246Contig1	FP260572; FP274096;
CL5250Contig1	FP298452; FP306482;
CL5257Contig1	FP256474; FP294651;
CL5261Contig1	FP248533; FP248532;
CL5265Contig1	FP270130; FP269478;
CL5269Contig1	FP252156; FP251480;
CL5273Contig1	FP284830; FP271771;
CL5277Contig1	FP266737; FP265176;
CL5281Contig1	FP263406; FP285858;
CL5285Contig1	FP250348; FP275619;
CL5289Contig1	FP302473; FP298905;
CL5293Contig1	FP277330; FP271436;
CL5297Contig1	FP295744; FP271465;
CL5301Contig1	FP283358; FP293408;
CL5305Contig1	FP256262; FP253491;
CL5309Contig1	FP309878; FP301321;
CL5313Contig1	FP281803; FP286507;
CL5316Contig1	FP245854; FP288358;
CL5320Contig1	FP260919; FP295318;
CL5325Contig1	FP261119; FP310034;
CL5329Contig1	FP272549; FP276591;
CL5332Contig1	FP262442; FP308843;
CL5336Contig1	FP268868; FP263694;
CL5340Contig1	FP270551; FP290943;
CL5344Contig1	FP277024; FP302202;
CL5348Contig1	FP266534; FP264695;
CL5352Contig1	FP306026; FP304902;
CL5356Contig1	FP267895; FP267842;
CL5360Contig1	FP284650; FP288825;
CL5364Contig1	FP311926; FP311925;
CL5368Contig1	FP255204; FP267639;
CL5372Contig1	FP296143; FP250975;
CL5376Contig1	FP247342; FP264484;
CL5379Contig1	FP272644; FP294148;
CL5384Contig1	FP256070; FP268340;
CL5388Contig1	FP246517; FP267112;
CL5392Contig1	FP270945; FP272432;
CL5396Contig1	FP270203; FP274945;
CL5400Contig1	FP250072; FP246446;
CL5405Contig1	FP279272; FP279271;
CL5409Contig1	FP256621; FP288510;
CL5413Contig1	FP246373; FP294159;
CL5417Contig1	FP281055; FP297074;
CL5421Contig1	FP280229; FP286431;
CL5425Contig1	FP272809; FP269246;
CL5429Contig1	FP310487; FP310314;
CL5433Contig1	FP249515; FP266475;
CL5437Contig1	FP252565; FP279913;
CL5441Contig1	FP257779; FP265707;
CL5445Contig1	FP247896; FP285928;
CL5449Contig1	FP264211; FP291080;
CL5454Contig1	FP284126; FP290804;
CL5458Contig1	FP247732; FP247616;
CL5462Contig1	FP247429; FP262056;
CL5467Contig1	FP245653; FP271675;
CL5471Contig1	FP262314; FP291160;
CL5475Contig1	FP256647; FP247532;
CL5479Contig1	FP283740; FP283739;
CL5482Contig1	FP264966; FP288000;
CL5486Contig1	FP269552; FP288533;
CL5490Contig1	FP291200; FP266906;
CL5494Contig1	FP266123; FP290475;
CL5498Contig1	FP292154; FP306167;
CL5502Contig1	FP262179; FP269641;
CL5506Contig1	FP269272; FP295600;
CL5510Contig1	FP276219; FP276146;
CL5514Contig1	FP268260; FP287739;
CL5518Contig1	FP267463; FP266007;
CL5522Contig1	FP271013; FP274621;
CL5526Contig1	FP249486; FP246817;
CL5530Contig1	FP251628; FP261688;
CL5534Contig1	FP312520; FP258313;
CL5538Contig1	FP292543; FP275547;
CL5542Contig1	FP246753; FP261975;
CL5546Contig1	FP262533; FP262996;
CL5550Contig1	FP264909; FP296140;
CL5554Contig1	FP260518; FP294654;
CL5558Contig1	FP262928; FP280811;
CL5561Contig1	FP276120; FP276108;
CL5565Contig1	FP265947; FP288490;
CL5570Contig1	FP251528; FP293509;
CL5575Contig1	FP266824; FP265278;
CL5579Contig1	FP247692; FP278762;
CL5583Contig1	FP265516; FP269075;
CL5587Contig1	FP298824; FP307821;
CL5590Contig1	FP253381; FP293369;
CL5594Contig1	FP257646; FP272689;
CL5598Contig1	FP251770; FP277976;
CL5601Contig1	FP292279; FP303272;
CL5606Contig1	FP267685; FP271042;
CL5610Contig1	FP278971; FP263362;
CL5613Contig1	FP267834; FP272366;
CL5618Contig1	FP261113; FP266382;
CL5626Contig1	FP269774; FP286660;
CL5630Contig1	FP305505; FP289266;
CL5633Contig1	FP260445; FP284280;
CL5637Contig1	FP260724; FP287982;
CL5641Contig1	FP260372; FP287268;
CL5645Contig1	FP282790; FP282789;
CL5649Contig1	FP265812; FP280600;
CL5653Contig1	FP261332; FP266731;
CL5657Contig1	FP269151; FP291636;
CL5661Contig1	FP263680; FP261107;
CL5665Contig1	FP282357; FP287848;
CL5669Contig1	FP299271; FP299058;
CL5673Contig1	FP268326; FP265182;
CL5679Contig1	FP254596; FP251421;
CL5683Contig1	FP251196; FP265662;
CL5688Contig1	FP248446; FP247647;
CL5692Contig1	FP260482; FP303294;
CL5696Contig1	FP282331; FP294803;
CL5699Contig1	FP281120; FP285123;
CL5703Contig1	FP285365; FP246942;
CL5707Contig1	FP258017; FP258200;
CL5711Contig1	FP262558; FP272381;
CL5715Contig1	FP273288; FP253297;
CL5719Contig1	FP265198; FP302131;
CL5723Contig1	FP266843; FP265876;
CL5727Contig1	FP249744; FP248993;
CL5731Contig1	FP276192; FP276056;
CL5735Contig1	FP272288; FP303173;
CL5739Contig1	FP276203; FP276163;
CL5744Contig1	FP285269; FP248007;
CL5748Contig1	FP273970; FP287879;
CL5752Contig1	FP256854; FP255995;
CL5756Contig1	FP255325; FP264898;
CL5760Contig1	FP269655; FP284155;
CL5764Contig1	FP274424; FP293401;
CL5768Contig1	FP279514; FP294989;
CL5772Contig1	FP247073; FP269145;
CL5776Contig1	FP270272; FP311205;
CL5779Contig1	FP311989; FP246908;
CL5783Contig1	FP283993; FP296882;
CL5787Contig1	FP279932; FP279931;
CL5791Contig1	FP246041; FP269931;
CL5795Contig1	FP257971; FP273520;
CL5799Contig1	FP267522; FP287203;
CL5803Contig1	FP272792; FP268837;
CL5807Contig1	FP260073; FP312569;
CL5811Contig1	FP259449; FP258468;
CL5815Contig1	FP268800; FP264721;
CL5819Contig1	FP295704; FP295038;
CL5823Contig1	FP264967; FP270696;
CL5827Contig1	FP246347; FP283028;
CL5831Contig1	FP284886; FP253056;
CL5835Contig1	FP270147; FP293717;
CL5838Contig1	FP250628; FP288588;
CL5843Contig1	FP248534; FP291489;
CL5846Contig1	FP281431; FP299138;
CL5850Contig1	FP280356; FP278046;
CL5854Contig1	FP275749; FP275748;
CL5858Contig1	FP262726; FP262725;
CL5862Contig1	FP270211; FP287962;
CL5866Contig1	FP249914; FP265431;
CL5870Contig1	FP248346; FP293796;
CL5874Contig1	FP254343; FP281959;
CL5879Contig1	FP263275; FP264152;
CL5882Contig1	FP298204; FP273649;
CL5887Contig1	FP246310; FP280611;
CL5891Contig1	FP252775; FP276523;
CL5895Contig1	FP270193; FP286989;
CL5900Contig1	FP261676; FP283986;
CL5904Contig1	FP274138; FP298681;
CL5906Contig1	FP268387; FP290964;
CL5910Contig1	FP261071; FP265606;
CL5915Contig1	FP270433; FP276850;
CL5919Contig1	FP245812; FP271271;
CL5923Contig1	FP250714; FP270895;
CL5927Contig1	FP312402; FP259939;
CL5931Contig1	FP253895; FP297632;
CL5935Contig1	FP292972; FP247787;
CL5939Contig1	FP254942; FP264336;
CL5943Contig1	FP274443; FP280506;
CL5947Contig1	FP274820; FP295057;
CL5951Contig1	FP252171; FP284871;
CL5955Contig1	FP263340; FP265764;
CL5959Contig1	FP249815; FP284712;
CL5963Contig1	FP251677; FP265407;
CL5967Contig1	FP257657; FP294076;
CL5971Contig1	FP247543; FP267969;
CL5975Contig1	FP299190; FP305795;
CL5979Contig1	FP269594; FP295825;
CL5983Contig1	FP300365; FP298355;
CL5986Contig1	FP271138; FP307217;
CL5991Contig1	FP260562; FP277142;
CL5995Contig1	FP246974; FP263773;
CL5999Contig1	FP252104; FP251831;
CL6003Contig1	FP286090; FP286089;
CL6006Contig1	FP295886; FP295885;
CL6010Contig1	FP261670; FP260891;
CL6015Contig1	FP245555; FP264982;
CL6019Contig1	FP288275; FP253119;
CL6023Contig1	FP255192; FP289309;
CL6028Contig1	FP269348; FP270375;
CL6031Contig1	FP253626; FP251465;
CL6036Contig1	FP248956; FP258653;
CL6040Contig1	FP253826; FP306074;
CL6043Contig1	FP310696; FP252661;
CL6047Contig1	FP279486; FP282788;
CL6051Contig1	FP273290; FP277489;
CL6055Contig1	FP292600; FP296360;
CL6060Contig1	FP270256; FP270250;
CL6064Contig1	FP307740; FP259715;
CL6068Contig1	FP267768; FP277879;
CL6072Contig1	FP263353; FP256770;
CL6076Contig1	FP256503; FP267845;
CL6080Contig1	FP286646; FP269303;
CL6085Contig1	FP274442; FP278837;
CL6089Contig1	FP246701; FP261790;
CL6093Contig1	FP253983; FP253490;
CL6097Contig1	FP252809; FP246479;
CL6101Contig1	FP260473; FP270087;
CL6105Contig1	FP250575; FP246515;
CL6109Contig1	FP282980; FP282899;
CL6113Contig1	FP246653; FP268191;
CL6118Contig1	FP248606; FP274039;
CL6123Contig1	FP251542; FP279956;
CL6127Contig1	FP271872; FP270036;
CL6134Contig1	FP299874; FP298283;
CL6137Contig1	FP278627; FP287778;
CL6141Contig1	FP264339; FP288461;
CL6145Contig1	FP262514; FP269251;
CL6150Contig1	FP287306; FP258690;
CL6154Contig1	FP264290; FP272619;
CL6158Contig1	FP263404; FP270305;
CL6162Contig1	FP266251; FP309316;
CL6166Contig1	FP252410; FP251182;
CL6171Contig1	FP266207; FP290923;
CL6175Contig1	FP246085; FP273443;
CL6179Contig1	FP263136; FP273565;
CL6182Contig1	FP247356; FP261854;
CL6186Contig1	FP254153; FP253759;
CL6191Contig1	FP257029; FP280635;
CL6195Contig1	FP265380; FP247307;
CL6203Contig1	FP306068; FP260027;
CL6206Contig1	FP276822; FP293016;
CL6210Contig1	FP264497; FP267392;
CL6214Contig1	FP252093; FP297145;
CL6218Contig1	FP260665; FP260621;
CL6222Contig1	FP270727; FP294397;
CL6226Contig1	FP293138; FP310276;
CL6230Contig1	FP255454; FP248219;
CL6234Contig1	FP269926; FP290481;
CL6238Contig1	FP267795; FP248866;
CL6242Contig1	FP263052; FP278295;
CL6246Contig1	FP253091; FP288786;
CL6250Contig1	FP251517; FP250549;
CL6254Contig1	FP245969; FP298844;
CL6258Contig1	FP271355; FP264114;
CL6262Contig1	FP263735; FP269496;
CL6267Contig1	FP274773; FP290608;
CL6271Contig1	FP248868; FP296237;
CL6275Contig1	FP289529; FP306664;
CL6279Contig1	FP260315; FP290992;
CL6283Contig1	FP266950; FP268893;
CL6287Contig1	FP309780; FP276610;
CL6291Contig1	FP287311; FP290429;
CL6295Contig1	FP308986; FP300415;
CL6299Contig1	FP262216; FP267717;
CL6303Contig1	FP251377; FP285751;
CL6307Contig1	FP271655; FP248918;
CL6311Contig1	FP252835; FP250515;
CL6315Contig1	FP260683; FP302434;
CL6319Contig1	FP294859; FP293453;
CL6323Contig1	FP302054; FP301162;
CL6327Contig1	FP271614; FP270194;
CL6331Contig1	FP275661; FP292599;
CL6335Contig1	FP274037; FP295430;
CL6339Contig1	FP257990; FP297013;
CL6343Contig1	FP277871; FP302166;
CL6347Contig1	FP251150; FP250059;
CL6351Contig1	FP246050; FP287511;
CL6355Contig1	FP260710; FP278594;
CL6359Contig1	FP267872; FP256156;
CL6365Contig1	FP266706; FP285876;
CL6369Contig1	FP270018; FP246550;
CL6373Contig1	FP247653; FP265676;
CL6377Contig1	FP266969; FP264670;
CL6381Contig1	FP251983; FP250646;
CL6385Contig1	FP291764; FP275457;
CL6392Contig1	FP298042; FP269233;
CL6396Contig1	FP302101; FP301159;
CL6400Contig1	FP267540; FP295395;
CL6404Contig1	FP262196; FP260124;
CL6408Contig1	FP266959; FP266019;
CL6412Contig1	FP268218; FP270864;
CL6416Contig1	FP260567; FP267909;
CL6420Contig1	FP257514; FP260340;
CL6424Contig1	FP251570; FP260214;
CL6428Contig1	FP286302; FP276440;
CL6432Contig1	FP263534; FP268049;
CL6436Contig1	FP257467; FP297872;
CL6440Contig1	FP256212; FP277040;
CL6444Contig1	FP269799; FP290878;
CL6448Contig1	FP265787; FP269129;
CL6453Contig1	FP262096; FP268457;
CL6458Contig1	FP266837; FP262843;
CL6462Contig1	FP285430; FP312529;
CL6464Contig1	FP261393; FP287659;
CL6468Contig1	FP260758; FP261319;
CL6472Contig1	FP261217; FP296344;
CL6476Contig1	FP255907; FP272810;
CL6480Contig1	FP268821; FP282654;
CL6484Contig1	FP247475; FP284594;
CL6488Contig1	FP310521; FP310488;
CL6492Contig1	FP248151; FP267754;
CL6496Contig1	FP252068; FP251044;
CL6500Contig1	FP276741; FP252286;
CL6504Contig1	FP307384; FP306585;
CL6509Contig1	FP268242; FP265386;
CL6513Contig1	FP264361; FP271995;
CL6517Contig1	FP255175; FP246675;
CL6521Contig1	FP287224; FP292231;
CL6526Contig1	FP273707; FP278123;
CL6529Contig1	FP284392; FP287919;
CL6533Contig1	FP263726; FP263213;
CL6538Contig1	FP272294; FP290508;
CL6542Contig1	FP259828; FP259845;
CL6546Contig1	FP268878; FP280276;
CL6549Contig1	FP277585; FP296209;
CL6554Contig1	FP263185; FP267621;
CL6558Contig1	FP289376; FP295001;
CL6561Contig1	FP246610; FP270408;
CL6566Contig1	FP302321; FP254390;
CL6570Contig1	FP261076; FP290983;
CL6574Contig1	FP263485; FP270386;
CL6578Contig1	FP302943; FP304435;
CL6582Contig1	FP285758; FP292737;
CL6586Contig1	FP270444; FP266419;
CL6590Contig1	FP255598; FP296470;
CL6594Contig1	FP270473; FP297868;
CL6598Contig1	FP263919; FP280735;
CL6602Contig1	FP284198; FP281965;
CL6606Contig1	FP246756; FP274666;
CL6610Contig1	FP258245; FP283271;
CL6613Contig1	FP245749; FP276746;
CL6617Contig1	FP285100; FP291031;
CL6621Contig1	FP285364; FP310038;
CL6625Contig1	FP287013; FP288858;
CL6629Contig1	FP272234; FP276433;
CL6633Contig1	FP261450; FP267839;
CL6637Contig1	FP245666; FP246757;
CL6641Contig1	FP245559; FP270923;
CL6645Contig1	FP278514; FP301205;
CL6649Contig1	FP267109; FP293732;
CL6653Contig1	FP264000; FP265849;
CL6657Contig1	FP300127; FP246759;
CL6661Contig1	FP257010; FP263317;
CL6665Contig1	FP273361; FP275644;
CL6669Contig1	FP277149; FP273060;
CL6672Contig1	FP273599; FP296204;
CL6676Contig1	FP257683; FP263364;
CL6680Contig1	FP247267; FP246494;
CL6684Contig1	FP275268; FP287963;
CL6688Contig1	FP261404; FP266111;
CL6692Contig1	FP251943; FP297616;
CL6696Contig1	FP272593; FP270880;
CL6700Contig1	FP268549; FP284006;
CL6704Contig1	FP277313; FP289158;
CL6708Contig1	FP267078; FP293077;
CL6712Contig1	FP263365; FP277049;
CL6716Contig1	FP269581; FP277072;
CL6720Contig1	FP258195; FP258116;
CL6724Contig1	FP275565; FP251309;
CL6727Contig1	FP288844; FP297577;
CL6731Contig1	FP245764; FP308545;
CL6735Contig1	FP263874; FP260585;
CL6739Contig1	FP268630; FP290683;
CL6743Contig1	FP249933; FP265175;
CL6747Contig1	FP252505; FP247690;
CL6751Contig1	FP284856; FP269834;
CL6755Contig1	FP282937; FP282936;
CL6758Contig1	FP266003; FP273995;
CL6762Contig1	FP282202; FP289119;
CL6766Contig1	FP308615; FP308614;
CL6770Contig1	FP254291; FP254290;
CL6774Contig1	FP263537; FP273167;
CL6778Contig1	FP251334; FP250167;
CL6782Contig1	FP246715; FP246318;
CL6786Contig1	FP247854; FP272604;
CL6790Contig1	FP254187; FP270823;
CL6795Contig1	FP292857; FP257723;
CL6799Contig1	FP269839; FP276493;
CL6803Contig1	FP279081; FP279080;
CL6806Contig1	FP254873; FP294178;
CL6811Contig1	FP298382; FP305739;
CL6815Contig1	FP249347; FP261555;
CL6819Contig1	FP270754; FP263114;
CL6823Contig1	FP253949; FP269201;
CL6827Contig1	FP303057; FP308362;
CL6831Contig1	FP305923; FP265868;
CL6835Contig1	FP312539; FP312427;
CL6839Contig1	FP255147; FP247634;
CL6843Contig1	FP265381; FP271256;
CL6847Contig1	FP264225; FP272120;
CL6851Contig1	FP266223; FP294433;
CL6855Contig1	FP245865; FP265539;
CL6859Contig1	FP265554; FP296529;
CL6863Contig1	FP271765; FP278423;
CL6867Contig1	FP252264; FP289227;
CL6871Contig1	FP265117; FP294456;
CL6875Contig1	FP280563; FP312484;
CL6879Contig1	FP266218; FP260282;
CL6883Contig1	FP252759; FP294039;
CL6887Contig1	FP248008; FP261767;
CL6891Contig1	FP250057; FP292107;
CL6895Contig1	FP252511; FP281652;
CL6899Contig1	FP254061; FP245755;
CL6902Contig1	FP263378; FP296132;
CL6905Contig1	FP247409; FP301097;
CL6910Contig1	FP253922; FP277026;
CL6914Contig1	FP286371; FP286373;
CL6918Contig1	FP257991; FP258176;
CL6922Contig1	FP275331; FP278770;
CL6926Contig1	FP272979; FP293331;
CL6930Contig1	FP304994; FP305722;
CL6933Contig1	FP261479; FP277084;
CL6937Contig1	FP309021; FP308899;
CL6941Contig1	FP278549; FP292962;
CL6945Contig1	FP257252; FP254047;
CL6949Contig1	FP263570; FP272141;
CL6954Contig1	FP277066; FP262025;
CL6956Contig1	FP256592; FP247712;
CL6960Contig1	FP247285; FP276716;
CL6964Contig1	FP289063; FP255363;
CL6968Contig1	FP263026; FP263025;
CL6972Contig1	FP280394; FP298299;
CL6976Contig1	FP272168; FP294179;
CL6984Contig1	FP250157; FP250178;
CL6988Contig1	FP269883; FP302243;
CL6992Contig1	FP304530; FP304408;
CL6996Contig1	FP256821; FP296907;
CL7000Contig1	FP288666; FP298004;
CL7004Contig1	FP262486; FP278902;
CL7008Contig1	FP260090; FP312589;
CL7012Contig1	FP293575; FP259518;
CL7016Contig1	FP260829; FP268075;
CL7020Contig1	FP257086; FP273105;
CL7024Contig1	FP270263; FP267860;
CL7028Contig1	FP250585; FP292218;
CL7032Contig1	FP293595; FP297468;
CL7036Contig1	FP249375; FP296152;
CL7040Contig1	FP283804; FP257365;
CL7044Contig1	FP286862; FP276495;
CL7048Contig1	FP247177; FP276563;
CL7052Contig1	FP252749; FP268283;
CL7056Contig1	FP275807; FP275806;
CL7060Contig1	FP273673; FP278983;
CL7064Contig1	FP277694; FP274254;
CL7068Contig1	FP270600; FP274031;
CL7076Contig1	FP308891; FP306517;
CL7080Contig1	FP272709; FP284574;
CL7084Contig1	FP263937; FP263938;
CL7088Contig1	FP250566; FP287195;
CL7092Contig1	FP249821; FP267891;
CL7096Contig1	FP270705; FP287506;
CL7100Contig1	FP308455; FP310863;
CL7102Contig1	FP288348; FP297377;
CL7106Contig1	FP283943; FP297428;
CL7110Contig1	FP251736; FP260295;
CL7114Contig1	FP283337; FP273650;
CL7118Contig1	FP308457; FP308717;
CL7123Contig1	FP270629; FP293032;
CL7128Contig1	FP267325; FP284370;
CL7132Contig1	FP283761; FP247556;
CL7138Contig1	FP312239; FP312238;
CL7142Contig1	FP246332; FP270661;
CL7146Contig1	FP264137; FP267749;
CL7150Contig1	FP247559; FP279842;
CL7154Contig1	FP266173; FP297079;
CL7158Contig1	FP251886; FP276693;
CL7162Contig1	FP270920; FP300803;
CL7166Contig1	FP247082; FP260930;
CL7170Contig1	FP266401; FP264073;
CL7174Contig1	FP272482; FP272020;
CL7178Contig1	FP264807; FP288737;
CL7183Contig1	FP260563; FP281912;
CL7186Contig1	FP247659; FP265940;
CL7190Contig1	FP270765; FP281089;
CL7195Contig1	FP247112; FP271022;
CL7199Contig1	FP285413; FP295612;
CL7202Contig1	FP271434; FP301577;
CL7206Contig1	FP309084; FP305220;
CL7210Contig1	FP268323; FP269735;
CL7214Contig1	FP258571; FP258497;
CL7218Contig1	FP268809; FP267592;
CL7222Contig1	FP260810; FP276774;
CL7226Contig1	FP263084; FP283779;
CL7230Contig1	FP300091; FP308333;
CL7234Contig1	FP281578; FP289754;
CL7238Contig1	FP293877; FP296096;
CL7242Contig1	FP266766; FP246052;
CL7246Contig1	FP262246; FP284762;
CL7250Contig1	FP297419; FP297418;
CL7254Contig1	FP253621; FP293841;
CL7258Contig1	FP250122; FP266647;
CL7262Contig1	FP265107; FP270964;
CL7266Contig1	FP255146; FP289400;
CL7270Contig1	FP293667; FP246665;
CL7273Contig1	FP289962; FP270417;
CL7278Contig1	FP265665; FP270304;
CL7282Contig1	FP257677; FP267234;
CL7286Contig1	FP263611; FP267150;
CL7291Contig1	FP250154; FP277253;
CL7296Contig1	FP310068; FP311729;
CL7298Contig1	FP292974; FP255322;
CL7303Contig1	FP311130; FP311112;
CL7307Contig1	FP264333; FP265644;
CL7311Contig1	FP262236; FP268748;
CL7316Contig1	FP284730; FP290460;
CL7320Contig1	FP250221; FP248830;
CL7324Contig1	FP248948; FP264267;
CL7328Contig1	FP260556; FP290837;
CL7332Contig1	FP268992; FP281004;
CL7336Contig1	FP270467; FP290818;
CL7340Contig1	FP267584; FP284801;
CL7344Contig1	FP287845; FP292912;
CL7348Contig1	FP267690; FP289900;
CL7352Contig1	FP248097; FP286313;
CL7356Contig1	FP294502; FP255389;
CL7360Contig1	FP285520; FP272292;
CL7364Contig1	FP261329; FP294431;
CL7368Contig1	FP260152; FP270651;
CL7372Contig1	FP266404; FP264647;
CL7376Contig1	FP256243; FP262420;
CL7383Contig1	FP288474; FP288473;
CL7387Contig1	FP269030; FP295126;
CL7391Contig1	FP247729; FP253002;
CL7396Contig1	FP251924; FP286061;
CL7400Contig1	FP287455; FP287454;
CL7404Contig1	FP267334; FP269585;
CL7408Contig1	FP270318; FP262412;
CL7412Contig1	FP285344; FP280939;
CL7416Contig1	FP270154; FP275698;
CL7421Contig1	FP300864; FP298573;
CL7425Contig1	FP288135; FP288134;
CL7429Contig1	FP263531; FP263216;
CL7433Contig1	FP295706; FP295544;
CL7437Contig1	FP268012; FP272201;
CL7442Contig1	FP268116; FP264919;
CL7445Contig1	FP254010; FP270519;
CL7449Contig1	FP264054; FP277224;
CL7453Contig1	FP271198; FP290085;
CL7458Contig1	FP261130; FP265055;
CL7462Contig1	FP256963; FP254598;
CL7466Contig1	FP252885; FP280623;
CL7470Contig1	FP303781; FP298888;
CL7474Contig1	FP256570; FP250721;
CL7478Contig1	FP268666; FP269304;
CL7482Contig1	FP274124; FP305610;
CL7486Contig1	FP250249; FP280230;
CL7490Contig1	FP284771; FP298319;
CL7494Contig1	FP248288; FP261381;
CL7502Contig1	FP246949; FP247304;
CL7506Contig1	FP260902; FP269389;
CL7510Contig1	FP292305; FP250686;
CL7514Contig1	FP281268; FP259853;
CL7517Contig1	FP266443; FP291879;
CL7521Contig1	FP262039; FP291123;
CL7526Contig1	FP262414; FP286522;
CL7530Contig1	FP288181; FP293778;
CL7534Contig1	FP304795; FP305053;
CL7539Contig1	FP246910; FP264217;
CL7542Contig1	FP310536; FP260941;
CL7546Contig1	FP286629; FP293880;
CL7550Contig1	FP281299; FP281298;
CL7554Contig1	FP279399; FP279398;
CL7558Contig1	FP262383; FP294432;
CL7562Contig1	FP280717; FP269511;
CL7566Contig1	FP261499; FP258270;
CL7570Contig1	FP264201; FP251683;
CL7574Contig1	FP253937; FP249165;
CL7578Contig1	FP297411; FP294345;
CL7582Contig1	FP270329; FP280020;
CL7586Contig1	FP255286; FP265846;
CL7590Contig1	FP246598; FP289462;
CL7594Contig1	FP250292; FP275822;
CL7598Contig1	FP251816; FP248651;
CL7602Contig1	FP251476; FP281496;
CL7606Contig1	FP246208; FP290944;
CL7610Contig1	FP251363; FP296698;
CL7614Contig1	FP250598; FP246346;
CL7618Contig1	FP257775; FP278130;
CL7622Contig1	FP255899; FP261031;
CL7626Contig1	FP264633; FP263605;
CL7630Contig1	FP267953; FP264386;
CL7634Contig1	FP264489; FP274030;
CL7638Contig1	FP282764; FP294789;
CL7642Contig1	FP270605; FP280591;
CL7645Contig1	FP254669; FP269380;
CL7649Contig1	FP269867; FP280938;
CL7653Contig1	FP264309; FP262458;
CL7657Contig1	FP289738; FP262091;
CL7662Contig1	FP250060; FP279487;
CL7666Contig1	FP278348; FP276871;
CL7670Contig1	FP265441; FP268793;
CL7674Contig1	FP254815; FP302622;
CL7678Contig1	FP299317; FP254365;
CL7682Contig1	FP299548; FP308502;
CL7690Contig1	FP295308; FP267633;
CL7694Contig1	FP248699; FP260799;
CL7698Contig1	FP283889; FP283888;
CL7704Contig1	FP266071; FP253460;
CL7708Contig1	FP300545; FP306955;
CL7712Contig1	FP290516; FP250648;
CL7716Contig1	FP296665; FP251451;
CL7720Contig1	FP279868; FP282069;
CL7724Contig1	FP291638; FP286659;
CL7728Contig1	FP255957; FP301305;
CL7732Contig1	FP261650; FP280787;
CL7736Contig1	FP278685; FP256511;
CL7740Contig1	FP253143; FP285996;
CL7744Contig1	FP253315; FP289387;
CL7749Contig1	FP255755; FP267144;
CL7753Contig1	FP251814; FP281108;
CL7757Contig1	FP247451; FP276466;
CL7761Contig1	FP250712; FP277046;
CL7765Contig1	FP264692; FP293840;
CL7769Contig1	FP297439; FP263592;
CL7773Contig1	FP290494; FP306555;
CL7777Contig1	FP246250; FP265282;
CL7781Contig1	FP268971; FP301927;
CL7785Contig1	FP264614; FP281622;
CL7789Contig1	FP254158; FP267624;
CL7793Contig1	FP260186; FP292546;
CL7797Contig1	FP286231; FP286230;
CL7801Contig1	FP261324; FP269538;
CL7805Contig1	FP264666; FP276510;
CL7809Contig1	FP299795; FP309558;
CL7813Contig1	FP255717; FP250523;
CL1001Contig1	FP300810; FP298353; FP261046; FP286344; FP277296; FP246295; FP263693; FP246617; FP286345;
CL1004Contig1	FP258693; FP255747; FP259875; FP273265; FP258784; FP266749; FP273266; FP246780; FP275561;
CL1007Contig1	FP274827; FP283079; FP296729; FP278574; FP302301; FP274649; FP307984; FP259114; FP303047;
CL1010Contig1	FP247917; FP248138; FP278597; FP265121; FP256626; FP284660; FP309628; FP276465; FP247916;
CL1011Contig1	FP303953; FP300054; FP259045; FP259765; FP259885; FP259647; FP307787; FP307817; FP308535;
CL1014Contig1	FP270024; FP291571; FP290792; FP272735; FP292573; FP263521; FP249032; FP293366; FP290793;
CL1017Contig1	FP266991; FP290379; FP312221; FP264585; FP249286; FP274403; FP288700; FP297960; FP295431;
CL1020Contig1	FP277722; FP280284; FP293212; FP272285; FP281021; FP248884; FP252761; FP260389; FP276775;
CL1024Contig1	FP283904; FP272609; FP260521; FP284485; FP305114; FP305137; FP300939; FP283903; FP293368;
CL1027Contig1	FP265216; FP271174; FP255396; FP254011; FP267152; FP257563; FP274024; FP251510; FP273432;
CL1029Contig1	FP246858; FP267814; FP297457; FP280510; FP286671; FP287194; FP297232; FP297593; FP283103;
CL102Contig1	FP247710; FP268020;
CL102Contig2	FP277139; FP283522; FP297088; FP280125; FP279136; FP294486; FP296463; FP293889; FP281992; FP251306; FP247889; FP297149; FP286896; FP273490; FP295171; FP283211; FP252919; FP292437; FP296597; FP291258; FP251775; FP251339; FP250110; FP252664; FP257877; FP248351; FP290376; FP250310; FP292449; FP249186; FP291237; FP292448; FP293888; FP287146; FP277138; FP298014; FP303563; FP291238; FP289698; FP255199;…
CL1032Contig1	FP278319; FP295915; FP292371; FP310973; FP300741; FP311624; FP272980; FP306880; FP311654;
CL1035Contig1	FP269626; FP255027; FP273461; FP254096; FP290810; FP281350; FP254034; FP251325; FP253702;
CL1038Contig1	FP249180; FP252406; FP295438; FP270126; FP262331; FP270516;
CL1038Contig2	FP307555; FP304978; FP311588;
CL1041Contig1	FP255300; FP254825; FP279259; FP254827; FP251935; FP295946; FP249927; FP282145; FP277785;
CL1044Contig1	FP269092; FP286978; FP249658; FP284618; FP263900; FP308378; FP247297; FP311419; FP310057;
CL1047Contig1	FP292679; FP290191; FP262705; FP264178; FP277095; FP262706; FP268642; FP292680; FP290192;
CL1050Contig1	FP249686; FP279859; FP290024; FP251203; FP267404; FP290864; FP303266; FP249685; FP280534;
CL1053Contig1	FP261204; FP287158; FP268046; FP290506; FP276326; FP282815; FP301263; FP247739; FP285503;
CL1056Contig1	FP256403; FP263757; FP260498; FP265957; FP262017; FP263536; FP247496; FP245729; FP270892;
CL1059Contig1	FP286658; FP297890; FP281152; FP249002; FP273139; FP286657; FP305543; FP302805; FP305648;
CL105Contig1	FP276025; FP287513; FP294570; FP247676; FP294653; FP276363; FP294558; FP292674; FP292465; FP250333; FP257021; FP253643; FP251483; FP253234; FP285369; FP251876; FP283847; FP273004; FP281083; FP277223; FP293768; FP250112; FP252856; FP300081; FP290745; FP247005; FP255347; FP301859; FP302553; FP292673; FP301885; FP310251; FP298665; FP312099; FP294652; FP308069; FP253493; FP302207; FP281082; FP277222;…
CL1062Contig1	FP287043; FP275485; FP255823; FP275484; FP259318; FP273039; FP287042; FP276391; FP304364;
CL1064Contig1	FP268239; FP268240; FP276463; FP271514; FP267143; FP276975; FP306335; FP305075; FP305508;
CL1067Contig1	FP266932; FP260714; FP272673; FP247041; FP305063; FP266584; FP310362; FP299948; FP305966;
CL1070Contig1	FP265338; FP294941; FP265523; FP262156; FP270784; FP307993; FP298950; FP280630; FP277349;
CL1073Contig1	FP267350; FP270424; FP271638; FP275439; FP292434; FP271574; FP312379; FP292433; FP300721;
CL1077Contig1	FP287560; FP262866; FP287561; FP269279; FP262867; FP262388; FP266041; FP260490; FP271782;
CL1080Contig1	FP250026; FP280347; FP291512; FP291391; FP247277; FP249631; FP269163; FP280346; FP291390;
CL1083Contig1	FP270290; FP269788; FP263993; FP275185; FP270273; FP298442; FP267551; FP299022; FP303693;
CL1086Contig1	FP257612; FP289967; FP254265; FP289966; FP254264; FP283643; FP283642; FP305497; FP306888;
CL1089Contig1	FP285919; FP262766; FP266531; FP248081; FP260607; FP270750; FP285920; FP262767; FP261812;
CL108Contig1	FP277566; FP296839; FP253976; FP282745; FP279995; FP247870; FP277898; FP294598; FP247878; FP253508; FP249451; FP252583; FP247912; FP280092; FP253358; FP290308; FP254157; FP254560; FP249721; FP297335; FP273816; FP258409; FP311493; FP312314; FP311515; FP268064; FP309797; FP308196; FP258738; FP293806; FP281735; FP254706; FP257381; FP302051; FP309590; FP296162; FP312313; FP273815; FP303151; FP296922;…
CL1091Contig1	FP272868; FP255051; FP255053; FP254370; FP253687; FP276515; FP264435; FP254369; FP272867;
CL1093Contig1	FP270678; FP278529; FP265653; FP294807; FP287980; FP246894; FP291017; FP287821; FP270172;
CL1097Contig1	FP260344; FP265798; FP282861; FP245862; FP281008; FP302210; FP281007; FP279154; FP258098;
CL1100Contig1	FP285456; FP261037; FP290189; FP295665; FP247442; FP298179; FP262296; FP290190; FP286109;
CL1102Contig1	FP279753; FP269547; FP268216; FP265168; FP245606; FP279767; FP276584; FP279752; FP283200;
CL1105Contig1	FP259163; FP260086; FP254594; FP261742; FP312070; FP312069; FP310493; FP257770; FP305030;
CL1108Contig1	FP284946; FP273814; FP293750; FP293477; FP256370; FP253607; FP272777; FP251232; FP290891;
CL1112Contig1	FP288230; FP274040; FP274256; FP245844; FP246614; FP271969; FP272495; FP290733;
CL1114Contig1	FP270963; FP270690; FP257298; FP246834; FP255643; FP274764; FP251489; FP274763;
CL1117Contig1	FP264345; FP269292; FP245638; FP294249; FP297480; FP266408; FP266985; FP263688;
CL111Contig1	FP285265; FP248416; FP255892; FP273605; FP281263; FP290346; FP255224; FP252539; FP274730; FP256449; FP251446; FP279315; FP274276; FP255951; FP263798; FP306138; FP271203; FP282015; FP286305; FP266273; FP288750; FP312090; FP299788; FP305587; FP275756; FP271484; FP282577; FP305286; FP305945; FP305768; FP297380; FP267042; FP307347; FP281262; FP303152; FP251478; FP311209; FP302858; FP301553; FP293080;…
CL1121Contig1	FP261102; FP245573; FP270684; FP284582; FP291949; FP261112;
CL1121Contig2	FP267483; FP291950;
CL1124Contig1	FP262563; FP267429; FP262564; FP267687; FP284520; FP287945; FP277081; FP269962;
CL1127Contig1	FP247643; FP298050; FP265791; FP268008; FP293144; FP306499; FP303694; FP264848;
CL1130Contig1	FP268572; FP250565; FP284476; FP291018; FP269548; FP276603; FP299503; FP284475;
CL1133Contig1	FP285260; FP255827; FP274063; FP260565; FP263963; FP289195; FP301143; FP280638;
CL1136Contig1	FP271789; FP291062; FP278274; FP287403; FP294109; FP267825; FP287402; FP281117;
CL1139Contig1	FP269923; FP257285; FP252259; FP291843; FP307796; FP308661; FP252258; FP311551;
CL1141Contig1	FP284040; FP280986; FP254643; FP271833; FP271538; FP248126; FP248450; FP263265;
CL1144Contig1	FP262848; FP262857; FP293436; FP293437; FP262849; FP262858; FP263259; FP281248;
CL1147Contig1	FP269016; FP263283; FP291051; FP293025; FP267583; FP248641; FP293526; FP280846;
CL114Contig1	FP274620; FP278413; FP277991; FP278408; FP288532; FP285001; FP296208; FP277441; FP274869; FP248117; FP274182; FP249346; FP282028; FP280444; FP291400; FP282792; FP288795; FP275451; FP295788; FP288448; FP293654; FP252824; FP297886; FP251518; FP256171; FP251240; FP252476; FP281479; FP276277; FP298287; FP291769; FP249509; FP251383; FP297570; FP255395; FP251684; FP276073; FP288459; FP253518; FP282399;…
CL1150Contig1	FP248863; FP257380; FP268900; FP265525; FP301785; FP310910; FP308700; FP259313;
CL1153Contig1	FP246576; FP274536; FP287754; FP271613; FP260328; FP268706; FP266801; FP284610;
CL1157Contig1	FP264101; FP287935; FP264100; FP297386; FP246378; FP270454; FP270425; FP294126;
CL1160Contig1	FP248152; FP282294; FP296902; FP271276; FP297638; FP267855; FP297637; FP296901;
CL1163Contig1	FP257893; FP245855; FP265374; FP249427; FP267183; FP265404; FP267071;
CL1165Contig1	FP269107; FP270471; FP292620; FP266705; FP271993; FP247480; FP292619; FP304064;
CL1169Contig1	FP285378; FP260955; FP247387; FP260362; FP267766; FP246596; FP285379; FP294579;
CL1172Contig1	FP254177; FP246359; FP260360; FP307638; FP269264; FP245568; FP258621; FP303719;
CL1175Contig1	FP290140; FP255288; FP297518; FP264657; FP262021; FP270107; FP246586; FP290139;
CL1178Contig1	FP249981; FP252600; FP248653; FP269864; FP260570; FP261701; FP269487; FP261426;
CL1181Contig1	FP290171; FP282057; FP252103; FP310035; FP309246; FP296313; FP282056; FP308711;
CL1183Contig1	FP249726; FP269995; FP291267; FP264662; FP247303; FP262001; FP269020; FP246977;
CL1186Contig1	FP292759; FP292731; FP254718; FP273099; FP256256; FP292758; FP273098; FP292730;
CL1189Contig1	FP269192; FP261897; FP249556; FP276113; FP276125; FP284075; FP274684; FP288655;
CL1192Contig1	FP250604; FP296173; FP277677; FP247738; FP256927; FP267914; FP271199; FP283482;
CL1195Contig1	FP269832; FP312173; FP245893; FP306366; FP246691; FP312172; FP285412; FP295611;
CL1198Contig1	FP265159; FP270662; FP288026; FP264139; FP246301; FP260398; FP273071; FP311181;
CL11Contig1	FP277454; FP249560; FP249289; FP278192; FP257548; FP250503; FP252281; FP253495; FP282869; FP250447; FP297259; FP286718; FP274905; FP298139; FP252034; FP254348; FP277453; FP305959; FP309470; FP282868; FP279214; FP249593; FP286717; FP305110; FP249803; FP298138; FP311429; FP276942; FP254308; FP278191; FP254347; FP311267; FP254307; FP249288; FP256310;
CL11Contig2	FP280078; FP257043; FP249664; FP283861; FP282091; FP255262; FP249264; FP283915; FP277822; FP280219; FP252077; FP253436; FP284131; FP296074; FP255210; FP283914; FP284098; FP296480; FP251610; FP280038; FP251092; FP250095; FP305726; FP250773; FP298026; FP305640; FP252155; FP303148; FP280169; FP299730; FP306776; FP302586; FP278954; FP275438; FP280077; FP304658; FP280189; FP293066; FP292339; FP283268;…
CL11Contig3	FP284350; FP285287; FP247905; FP285328; FP285380; FP291535; FP283541; FP284132; FP283269; FP296827; FP284399; FP254527; FP251581; FP282228; FP279378; FP293275; FP248990; FP273103; FP283216; FP286404; FP248332; FP286030; FP293920; FP275132; FP290049; FP281579; FP273227; FP249308; FP282049; FP274509; FP248889; FP282863; FP289859; FP287243; FP248414; FP297021; FP294506; FP249096; FP280190; FP297223;…
CL1201Contig1	FP255263; FP277653; FP251108; FP279361; FP253110; FP246539; FP303748; FP279360;
CL1206Contig1	FP296193; FP293619; FP250587; FP257184; FP280521; FP306029; FP293618; FP307953;
CL1209Contig1	FP266894; FP261435; FP291045; FP260923; FP284528; FP250881; FP246790; FP270625;
CL1212Contig1	FP300368; FP308392; FP298605; FP310267; FP283594; FP270960; FP301932; FP311300;
CL1215Contig1	FP274593; FP247942; FP292618; FP272105; FP253191; FP255991; FP272217; FP289054;
CL1219Contig1	FP292830; FP252755; FP273603; FP283240; FP277553; FP255285; FP257199; FP275241;
CL121Contig1	FP283951; FP277883; FP295212; FP285902; FP249253; FP283577; FP290035; FP258044; FP295947; FP297625; FP292549; FP273875; FP255629; FP297969; FP249957; FP256867; FP251905; FP288771; FP252753; FP275346; FP274748; FP261857; FP276187; FP276050; FP297344; FP290689; FP258294; FP277882; FP311529; FP279988; FP312430; FP284720; FP247035; FP283950; FP310205; FP258336; FP276186; FP288770; FP310483; FP295211;…
CL1222Contig1	FP280174; FP260684; FP292790; FP291833; FP292789; FP299051; FP280173; FP307899;
CL1224Contig1	FP268764; FP256916; FP248500; FP309117; FP263508; FP248499; FP309428; FP296741;
CL1227Contig1	FP245686; FP266043; FP292353; FP263958; FP263959; FP270671; FP265019; FP292352;
CL1230Contig1	FP283455; FP268400; FP263226; FP250809; FP247065; FP289483; FP264098; FP283454;
CL1235Contig1	FP282482; FP269699; FP260546; FP277385; FP264237; FP255636; FP281379; FP282483;
CL1237Contig1	FP284228; FP277844; FP279697; FP291326; FP257749; FP282812; FP274176; FP293260;
CL123Contig1	FP279536; FP277113; FP295324; FP252569; FP290483; FP253599; FP295163; FP294934; FP285567; FP287380; FP293323; FP289656; FP288899; FP255071; FP282147; FP249232; FP297807; FP255201; FP249813; FP250555; FP275289; FP288325; FP297517; FP251522; FP274958; FP294992; FP254796; FP295078; FP290236; FP285980; FP268229; FP290235; FP300562; FP294933; FP282146; FP293322; FP295323; FP295162; FP288527; FP289655;…
CL1240Contig1	FP276074; FP296272; FP262194; FP264180; FP263358; FP276075; FP271019; FP290619;
CL1243Contig1	FP261032; FP294035; FP294222;
CL1243Contig2	FP286793; FP258610; FP270744; FP300687; FP286792;
CL1246Contig1	FP260703; FP276547; FP245726; FP267616; FP246460; FP262077; FP271740; FP263533;
CL1249Contig1	FP264411; FP281188; FP290452; FP307531; FP281187; FP290451; FP301428; FP283714;
CL1252Contig1	FP285339; FP252158; FP281289; FP250021; FP250168; FP250571; FP256869; FP283218;
CL1255Contig1	FP260281; FP266421; FP266778; FP261520; FP246183; FP300291; FP269316; FP275618;
CL1258Contig1	FP245620; FP267867; FP297067; FP284752; FP267004; FP261159; FP286757; FP297066;
CL1261Contig1	FP252474; FP285827; FP298680; FP311553; FP246611; FP265489; FP269482; FP261512;
CL1264Contig1	FP305674; FP260928; FP300679; FP296527; FP288934; FP263891; FP276988; FP289427;
CL1265Contig1	FP282650; FP285794; FP287387; FP277964; FP290103; FP295059; FP252119; FP279162;
CL1269Contig1	FP280885; FP253527; FP251128; FP300491; FP300469; FP278827; FP266911; FP267838;
CL1271Contig1	FP247950; FP275486; FP293527; FP265907; FP252102; FP276497; FP260775; FP246571;
CL1275Contig1	FP269679; FP278924; FP264213; FP263109; FP246171; FP261318; FP263108; FP278923;
CL1279Contig1	FP267720; FP295237; FP307521; FP307520; FP249857; FP246795; FP280485; FP282932;
CL127Contig1	FP283133; FP272941; FP288713; FP286106; FP279918; FP278730; FP251872; FP290258; FP291210; FP278774; FP298208; FP256981; FP255197; FP252844; FP280116; FP249875; FP285801; FP274157; FP311960; FP297947; FP252645; FP280955; FP312245; FP290500; FP307252; FP283911; FP279067; FP301591; FP287526; FP312516; FP312460; FP301439; FP273879; FP249971; FP258006; FP280115; FP298207; FP304756; FP284378; FP307717;…
CL1282Contig1	FP253967; FP252894; FP247094; FP298085; FP278018; FP270480; FP299125; FP305320;
CL1284Contig1	FP274865; FP257402; FP268973; FP247395; FP274864; FP288560; FP286324; FP310683;
CL1287Contig1	FP248425; FP257704; FP291380; FP249416; FP252340; FP253915; FP270202; FP267146;
CL1290Contig1	FP256905; FP293890; FP257434; FP251984; FP283300; FP295939; FP290209; FP272249;
CL1294Contig1	FP278456; FP293769; FP270167; FP295881; FP273800; FP272298; FP291779; FP285799;
CL1297Contig1	FP257362; FP246361; FP273064;
CL1297Contig2	FP254496; FP273862; FP251083; FP279634; FP291726;
CL129Contig1	FP275148; FP281676; FP296235; FP256938; FP250676; FP252956;
CL129Contig2	FP287249; FP274280; FP290372; FP282318;
CL129Contig3	FP291616; FP286627; FP257777; FP304404; FP300252; FP300112; FP299237; FP280429; FP283369; FP293242; FP283394; FP290157; FP276121; FP284912; FP286079; FP277284; FP310016; FP248837; FP246956; FP283297; FP267784; FP248738; FP275436; FP273421; FP283248; FP283699; FP277591; FP285701; FP286290; FP290371; FP286366; FP310379; FP277801; FP277423; FP282317; FP289203; FP288590; FP299949; FP303713;
CL1301Contig1	FP259138; FP263369; FP293200; FP288011; FP261209; FP277409; FP293201; FP270563;
CL1304Contig1	FP278687; FP282984; FP260938; FP278688; FP284613; FP269944; FP282985; FP287952;
CL1307Contig1	FP263763; FP267345; FP253273; FP307550; FP307549; FP291086; FP272830; FP307330;
CL1310Contig1	FP272355; FP265757; FP247466; FP272281; FP273992; FP299287; FP307898; FP273991;
CL1312Contig1	FP285656; FP254317; FP247323; FP266343; FP265795; FP246581; FP273854; FP262369;
CL1315Contig1	FP254054; FP257347; FP254274; FP290526; FP261919; FP266734; FP254055; FP252466;
CL1318Contig1	FP254708; FP249662;
CL1318Contig2	FP282718; FP272762; FP271161; FP279237; FP255430; FP282717;
CL131Contig1	FP285357; FP277712; FP283734; FP248108; FP278384; FP285537; FP284211; FP298017; FP279250; FP289865; FP279725; FP286127; FP295088; FP275513; FP288131; FP292709; FP275355; FP253675; FP252020; FP250995; FP255348; FP248829; FP257795; FP287297; FP247604; FP251661; FP294463; FP286312; FP256485; FP279970; FP294640; FP281948; FP254609; FP279877; FP307422; FP281947; FP298016; FP294462; FP260080; FP285356;…
CL1322Contig1	FP250888; FP273217; FP256364; FP269284; FP269188; FP264846; FP266346; FP280874;
CL1325Contig1	FP304114; FP309156; FP303537; FP304345; FP304324; FP302812; FP311195; FP310422;
CL1328Contig1	FP266318; FP263095; FP263491; FP271903; FP263096; FP261735; FP269344;
CL1331Contig1	FP246979; FP275865; FP258447; FP256533; FP296485; FP258862; FP311616;
CL1334Contig1	FP256682; FP264412; FP271150; FP263527; FP262500; FP263049; FP310635;
CL1337Contig1	FP255215; FP278980; FP290023; FP280008; FP250426; FP254600; FP252760;
CL1341Contig1	FP267175; FP265119; FP263835; FP249807; FP260746; FP280814; FP294092;
CL1344Contig1	FP248669; FP263898; FP248426; FP309678; FP304686; FP259913; FP282395;
CL1346Contig1	FP250372; FP265172; FP303492; FP303363; FP288596; FP307722; FP288595;
CL1349Contig1	FP270852; FP266770; FP284777; FP272576; FP267602; FP253047; FP273471;
CL134Contig1	FP285223; FP285385; FP270324; FP272265; FP288702; FP291272; FP266538; FP300765; FP254245; FP249826; FP292202; FP301244; FP308503; FP301196; FP306290; FP274118; FP299134; FP308586; FP287300; FP304793; FP307116; FP307616; FP308540; FP308166; FP306945; FP298617; FP311469; FP312002; FP312003; FP302676; FP299229; FP302557; FP311162; FP298500; FP300968; FP305364; FP304719; FP300403; FP299711; FP297169;…
CL1352Contig1	FP297108; FP262933; FP280543; FP262934; FP266509; FP297109; FP265065;
CL1356Contig1	FP274983; FP246529; FP274984; FP247063; FP272910; FP270027; FP290240;
CL1358Contig1	FP272794; FP268459; FP290086; FP251337; FP276883; FP283960; FP285593;
CL1361Contig1	FP252404; FP266185; FP251294; FP273134; FP297414; FP275410; FP275065;
CL1364Contig1	FP245981; FP271498; FP287804; FP265815; FP268258; FP292017; FP292016;
CL1367Contig1	FP282613; FP292094; FP266018; FP263509; FP312289; FP282612; FP312288;
CL1370Contig1	FP278099; FP297669; FP249474; FP278303; FP293870; FP296453;
CL1372Contig1	FP269734; FP276488; FP269703; FP257487; FP273560; FP274896; FP273829;
CL1376Contig1	FP302017; FP304313; FP267902; FP281712; FP245937; FP269913; FP281713;
CL1379Contig1	FP265851; FP269291; FP296661; FP253582; FP297329; FP275428; FP295896;
CL1382Contig1	FP269974; FP255726; FP264099; FP264705; FP269403; FP271898; FP285944;
CL1385Contig1	FP284441; FP277147; FP276701; FP257558; FP252126; FP256246; FP250922;
CL1388Contig1	FP273445; FP249804; FP263224; FP272698; FP272588; FP290082; FP273444;
CL138Contig1	FP270453; FP278493; FP298331; FP302962; FP300840; FP287332; FP281896; FP297936; FP286866; FP297653; FP254983; FP301289; FP255820; FP256379; FP303195; FP250132; FP256803; FP301954; FP303302; FP308213; FP303188; FP302233; FP299560; FP300264; FP288773; FP300128; FP299329; FP303466; FP305812; FP302922; FP299542; FP303259; FP308261; FP301683; FP306703; FP304931; FP300276; FP258807; FP311262; FP305980;…
CL1390Contig1	FP283658; FP290303; FP297747; FP248663; FP251577; FP252139; FP258058;
CL1393Contig1	FP262430; FP266193; FP261519; FP266462; FP271500; FP294215; FP270032;
CL1396Contig1	FP256260; FP300433; FP307106; FP285552; FP282998; FP288744; FP310061;
CL1399Contig1	FP284354; FP262729; FP296948; FP296949; FP247338; FP268005; FP284355;
CL1402Contig1	FP304136; FP269299; FP303037; FP309051; FP299267; FP304376; FP299931;
CL1404Contig1	FP291457; FP274735; FP255078; FP281092; FP246038; FP291456; FP281091;
CL1408Contig1	FP261868; FP287744; FP261923; FP291065; FP305487; FP312345; FP312344;
CL1411Contig1	FP282961; FP247095; FP269970; FP304129; FP306882; FP305310; FP302987;
CL1414Contig1	FP263453; FP282227; FP282322; FP272335; FP265538; FP262724; FP282226;
CL1416Contig1	FP267519; FP268449; FP264347; FP265233; FP289743; FP258380; FP258373;
CL1418Contig1	FP265354; FP266407; FP255710; FP255690; FP247946; FP294624; FP297907;
CL141Contig1	FP257921; FP311219; FP279742; FP293393; FP247825; FP290701; FP291655; FP247921; FP258663; FP285118; FP248898; FP277494; FP277416; FP276345; FP295392; FP286585; FP282877; FP248842; FP276346; FP276010; FP285119; FP273960; FP288870; FP281874; FP285148; FP279743; FP248843; FP251406; FP296593; FP257665; FP293394; FP257400; FP276176; FP276189; FP282878; FP249550; FP247826; FP252709; FP286965; FP249411;…
CL1421Contig1	FP254939; FP263205; FP254941; FP255802; FP245837; FP262820; FP262819;
CL1425Contig1	FP267200; FP269765; FP261907; FP261465; FP271660; FP269425; FP284608;
CL1429Contig1	FP266456; FP271321; FP262199; FP312018; FP258618; FP301413; FP300055;
CL1432Contig1	FP285747; FP298001; FP261258; FP294298; FP285748; FP267618; FP298002;
CL1435Contig1	FP265052; FP264559; FP278700; FP278961; FP289795; FP260144; FP270487;
CL1438Contig1	FP269376; FP269144; FP294197; FP249177; FP261208; FP260610; FP287396;
CL1441Contig1	FP302559; FP253602; FP288484; FP289049; FP277475; FP284343; FP285329;
CL1443Contig1	FP308286; FP278773; FP287812; FP246010; FP276996; FP290703; FP286147;
CL1446Contig1	FP296530; FP309814; FP259036; FP258837; FP283834; FP310726; FP253642;
CL1449Contig1	FP267154; FP267926; FP280831; FP263470; FP272319; FP282614; FP294418;
CL144Contig1	FP293334; FP282487; FP286173; FP249413; FP253907; FP286443; FP256943; FP248915; FP251756; FP248040; FP288189; FP290652; FP285918; FP294918; FP282486; FP286172; FP305771; FP302904; FP249984; FP308879; FP304981; FP300327; FP302924; FP305212; FP249412; FP293333; FP285917; FP310825; FP306544; FP310625; FP301762; FP303027; FP298537; FP290651; FP308508; FP290057; FP251765; FP288188; FP276161; FP310717;…
CL1452Contig1	FP265857; FP274399; FP246315; FP268831; FP283691; FP253586; FP269255;
CL1456Contig1	FP285808; FP246237; FP288661; FP260992; FP266504; FP249292; FP285807;
CL1458Contig1	FP272157; FP290515; FP263850; FP263322; FP283582; FP308068; FP281557;
CL1461Contig1	FP282585; FP282586; FP249159; FP273880; FP282657; FP283077; FP283086;
CL1464Contig1	FP266848; FP245805; FP270289; FP271456; FP264413; FP283499; FP287730;
CL1467Contig1	FP292047; FP291544; FP284513; FP295629; FP264128; FP274183; FP292046;
CL1470Contig1	FP264405; FP270666; FP306338; FP302200; FP259638; FP259604; FP299501;
CL1474Contig1	FP283786; FP259035; FP309762; FP279227; FP248991; FP281541; FP295020;
CL1476Contig1	FP292772; FP260812; FP287840; FP271293; FP246421; FP280626; FP301401;
CL1479Contig1	FP269248; FP261326; FP294381; FP267435; FP247134; FP269854; FP280663;
CL147Contig1	FP285171; FP281049; FP293423; FP248207; FP254809; FP248901; FP291429; FP288575; FP281636; FP274537; FP287517; FP294037; FP280388; FP290239; FP285036; FP290711; FP255500; FP284868; FP255712; FP293149; FP249720; FP255969; FP251837; FP267335; FP247838; FP249719; FP254170; FP254171; FP258681; FP246079; FP291428; FP296621; FP296622; FP280387; FP290238; FP281177; FP283277; FP283278; FP281176; FP284867;…
CL1482Contig1	FP277554; FP250744; FP253771; FP265834; FP257721; FP247539; FP264087;
CL1485Contig1	FP262825; FP263194; FP263195; FP251413; FP276054; FP262826; FP276164;
CL1488Contig1	FP266369; FP268770; FP263613; FP261918; FP272237; FP272022; FP305280;
CL1491Contig1	FP267708; FP255256; FP296820; FP252435; FP280146; FP246172; FP264893;
CL1495Contig1	FP262680; FP299145; FP252309; FP262327; FP262681; FP293194; FP264500;
CL1498Contig1	FP263120; FP248171; FP280784; FP276762; FP246047; FP305481; FP263119;
CL1501Contig1	FP272882; FP261260; FP278916; FP276979; FP272883; FP278917; FP260426;
CL1503Contig1	FP255635; FP260820; FP246959; FP261165; FP286455; FP269056; FP261831;
CL1508Contig1	FP301649; FP282066; FP306457; FP284384; FP306557; FP258212; FP308821;
CL150Contig1	FP248581; FP295760; FP307017; FP259195; FP311050; FP279934; FP273106; FP258978; FP293678; FP282444; FP280051; FP274964; FP273055; FP297798; FP275559; FP301751; FP296742; FP288211; FP282445; FP302759; FP301499; FP281506; FP293679; FP251293; FP279373; FP295761; FP257486; FP253551; FP273056; FP254603; FP283425; FP251087; FP290107; FP273107; FP293665; FP275560; FP255882; FP248582; FP296743; FP249595;…
CL1511Contig1	FP271513; FP250375; FP290227; FP297755; FP303972; FP290226; FP261568;
CL1513Contig1	FP283159; FP271333; FP267296; FP253041; FP267958; FP307510; FP307509;
CL1517Contig1	FP250185; FP306990;
CL1517Contig2	FP249943; FP256994; FP248909; FP287139; FP287621;
CL1519Contig1	FP266313; FP285846; FP279943; FP261585; FP263210; FP263191; FP265790;
CL1523Contig1	FP311755; FP254123; FP249489; FP262786; FP282383; FP261862; FP249490;
CL1526Contig1	FP260848; FP290205; FP255164; FP270097; FP259838; FP296335; FP290204;
CL1529Contig1	FP281325; FP276156; FP299571; FP278761; FP247691; FP274004; FP281324;
CL1532Contig1	FP290141; FP279251; FP281528; FP299358; FP282780; FP283351; FP293402;
CL1535Contig1	FP281099; FP275706; FP287452; FP302125; FP256925; FP284729; FP281100;
CL1537Contig1	FP275639; FP253048; FP257148; FP284872; FP263121; FP251000; FP311568;
CL153Contig1	FP257634; FP290670; FP287166;
CL153Contig2	FP276380; FP275987;
CL153Contig3	FP278718; FP289410; FP253738; FP252428; FP284451; FP296910; FP248122; FP256891; FP294026; FP250432; FP293993; FP255112; FP257761; FP287289; FP273587; FP280338; FP277257; FP247611; FP253023; FP272864; FP310072; FP290669; FP279707; FP296105; FP252427; FP277159; FP250339; FP250918; FP280337; FP275986; FP276379; FP293992; FP284073; FP277256; FP287288; FP278717;
CL1540Contig1	FP265478; FP286475; FP293599; FP261749; FP247404; FP270302; FP267153;
CL1544Contig1	FP251896; FP253102; FP296252; FP263504; FP290674; FP303615; FP283030;
CL1546Contig1	FP249682; FP296411; FP254131; FP261577; FP253142; FP266486; FP310091;
CL1550Contig1	FP265735; FP274491; FP279191; FP290474; FP252397; FP278817; FP285955;
CL1552Contig1	FP268262; FP287735; FP270939; FP265818; FP297452; FP267364; FP272357;
CL1555Contig1	FP267258; FP269186; FP266908; FP262169; FP245918; FP263765; FP293688;
CL1559Contig1	FP298884; FP267619; FP277094; FP269170; FP266275; FP270870; FP271077;
CL1562Contig1	FP278442; FP266763; FP290302; FP245639; FP296739; FP254465; FP255176;
CL1565Contig1	FP282643; FP255610; FP262250; FP299936; FP298637; FP261018; FP280860;
CL1568Contig1	FP255950; FP250961; FP290197; FP286692; FP270153; FP263487; FP280619;
CL156Contig1	FP256677; FP288523; FP273699; FP293871; FP277669; FP283235; FP251266; FP289458; FP283807; FP249656; FP256226; FP279499; FP251812; FP273958; FP256058; FP292539; FP295867; FP253489; FP251233; FP297754; FP255461; FP279077; FP254279; FP256125; FP288208; FP292572; FP279921; FP294951; FP276390; FP248557; FP273685; FP288793; FP273604; FP289711; FP282969; FP291377; FP275966; FP284142; FP279484; FP277488;
CL1572Contig1	FP248879; FP289888; FP275340; FP266637; FP264615; FP255861; FP295774;
CL1575Contig1	FP286662; FP271179; FP273051; FP250637; FP261503; FP256679; FP289887;
CL1578Contig1	FP285561; FP307925; FP292207; FP299716; FP284367; FP299050; FP298698;
CL1580Contig1	FP297812; FP288854; FP267894; FP268288; FP280725; FP288855; FP297813;
CL1583Contig1	FP267190; FP254757; FP266639; FP271237; FP266597; FP269111; FP269915;
CL1586Contig1	FP285722; FP270609; FP247178; FP263496; FP271080; FP247310; FP291128;
CL1590Contig1	FP278995; FP251187; FP294524; FP251787; FP292086; FP297426; FP297288;
CL1593Contig1	FP294084; FP251655; FP246387; FP264083; FP277684; FP254022; FP292041;
CL1596Contig1	FP260500; FP271808; FP299002; FP291824; FP291823; FP292304; FP258008;
CL1599Contig1	FP276861; FP268771; FP262551; FP276505; FP263489; FP262106; FP275274;
CL15Contig1	FP284843; FP283745; FP277216; FP277726; FP283442; FP250538; FP249357; FP253563; FP251766; FP273238; FP295517; FP250536; FP289978; FP257464; FP251378; FP296658; FP291898; FP297410; FP296918; FP255449; FP257516; FP253356; FP250276; FP253904; FP280881; FP250288; FP282882; FP293872; FP292491; FP255096; FP309004; FP249571; FP304827; FP284309; FP282703; FP283284; FP249404; FP303123; FP297917; FP288346;…
CL15Contig2	FP282967; FP305180; FP282966;
CL15Contig3	FP295677; FP252865; FP253408; FP251096; FP296953; FP248064; FP276217; FP249892; FP252615; FP289689; FP285264; FP263578; FP255941; FP272511; FP270361; FP307540; FP308852; FP302504; FP309125; FP306746; FP285263; FP300022; FP248063; FP307311; FP309237; FP307901; FP307539; FP306870; FP299242; FP309671; FP299593; FP296952; FP308393; FP307036;
CL1602Contig1	FP271493; FP289339; FP254567; FP261028; FP296348; FP307773; FP296347;
CL1605Contig1	FP266506; FP264782; FP261803; FP269683; FP261305; FP280768; FP287863;
CL1608Contig1	FP296316; FP252811; FP269501; FP255417; FP289274; FP261281; FP260920;
CL1612Contig1	FP259949; FP258482; FP251977; FP260044; FP260006; FP259328; FP259569;
CL1615Contig1	FP274258; FP290469; FP252882; FP261508; FP269247; FP290468; FP310127;
CL1618Contig1	FP273057; FP303792; FP266905; FP270929; FP297001; FP247232; FP287950;
CL161Contig1	FP285420; FP277527; FP284374; FP283794; FP282528; FP282326; FP297060; FP290710; FP293291; FP248240; FP249483; FP296239; FP257109; FP287629; FP252207; FP303218; FP258556; FP302006; FP305355; FP299365; FP277526; FP307983; FP296238; FP308011; FP301974; FP309260; FP259019; FP259448; FP286131; FP297059; FP299484; FP304977; FP308589; FP304607; FP284373; FP258445; FP249482; FP282325; FP309698; FP309440;
CL1621Contig1	FP249808; FP297479;
CL1621Contig2	FP263067; FP260870; FP270948; FP263066; FP297478;
CL1624Contig1	FP278270; FP247483; FP268205; FP285732; FP276782; FP294374; FP278269;
CL1627Contig1	FP282264; FP283971; FP269633; FP249711; FP272606; FP250029; FP287855;
CL162Contig1	FP284118; FP281695; FP249056; FP274877; FP287719; FP248545; FP250673; FP253269; FP281517; FP292628; FP273864; FP302050; FP289271; FP300303; FP263931; FP310433; FP301490; FP293231; FP305523; FP302293; FP281516; FP298524; FP300159; FP304154; FP304727; FP274876; FP305239; FP304044; FP303507; FP303906; FP305521; FP305532; FP302329; FP299320; FP249605; FP298983; FP306118; FP305926;
CL162Contig2	FP304140; FP273863;
CL1630Contig1	FP253380; FP250146; FP250940; FP275509; FP275594; FP279612;
CL1633Contig1	FP270227; FP262477; FP268227; FP259857; FP259856; FP297674;
CL1636Contig1	FP263231; FP268006; FP266951; FP290630; FP297336; FP290078;
CL1639Contig1	FP247512; FP274395; FP271011; FP267947; FP287983; FP264852;
CL1643Contig1	FP276144; FP276145; FP286534; FP308543; FP287948; FP291087;
CL1645Contig1	FP266523; FP260293; FP263343; FP266579; FP271404; FP272717;
CL1648Contig1	FP283168; FP251773; FP298176; FP283167; FP283517; FP298175;
CL1651Contig1	FP267897; FP279991; FP247023; FP264994; FP247124; FP277030;
CL1654Contig1	FP279349; FP272042; FP249460; FP265151; FP266609; FP247016;
CL1657Contig1	FP292249; FP263767; FP294983; FP272059; FP271804; FP292250;
CL1660Contig1	FP263155; FP283763; FP283762; FP263156; FP263339; FP271497;
CL1663Contig1	FP294693; FP284004; FP269082; FP301663; FP302168; FP284003;
CL1666Contig1	FP271752; FP267009; FP246679; FP271067; FP269444; FP270347;
CL1669Contig1	FP283287; FP273505; FP285403; FP279127; FP256530; FP252232;
CL166Contig1	FP277414; FP254958; FP286495; FP281983; FP278830; FP285603; FP256454; FP253034; FP251331; FP256785; FP289109; FP256254; FP285355; FP284864; FP259263; FP295501; FP259269; FP259503; FP258856; FP258827; FP251744; FP290060; FP285602; FP293431; FP309239; FP309920; FP305827; FP298445; FP310313; FP273527; FP309539; FP286494; FP300625; FP304962; FP310592; FP295500; FP304826; FP309054; FP249842;
CL1672Contig1	FP281405; FP250034; FP253074; FP267925; FP254362; FP280061;
CL1675Contig1	FP265799; FP267448; FP264092; FP271586; FP294282; FP260734;
CL1678Contig1	FP267530; FP284821; FP263925; FP272753; FP271487; FP266627;
CL1682Contig1	FP260843; FP271210; FP284811; FP294308; FP265648; FP289306;
CL1685Contig1	FP247011; FP262991; FP262990;
CL1685Contig2	FP265544; FP284750; FP271988;
CL1688Contig1	FP273160; FP255029; FP256887; FP294832; FP289282; FP295195;
CL1691Contig1	FP253761; FP274139; FP251724; FP295539; FP276816; FP295606;
CL1695Contig1	FP267886; FP248162; FP271278; FP269309; FP270369; FP273571;
CL1698Contig1	FP250687; FP248749; FP247979; FP251497; FP247978; FP248748;
CL169Contig1	FP282538; FP275052; FP286591; FP291223; FP258989; FP248615; FP257882; FP254164; FP297293; FP310328; FP283227; FP288264; FP296771; FP270052; FP282539; FP265289; FP291224; FP293913; FP259399; FP248920; FP254625; FP275053; FP278967; FP297294; FP290402; FP255548; FP286592; FP293967; FP297695; FP283980; FP249492; FP289739; FP297714; FP296772; FP283228; FP250574; FP248616; FP288265; FP281231;
CL1701Contig1	FP278302; FP257686; FP252640; FP297668; FP250066;
CL1704Contig1	FP256524; FP275184; FP301169; FP286634; FP273664; FP286635;
CL1706Contig1	FP245742; FP260338; FP268930;
CL1706Contig2	FP283621; FP266869; FP294166;
CL1710Contig1	FP277932; FP282220; FP246814; FP287543; FP290605; FP288850;
CL1712Contig1	FP263390; FP267370; FP260332; FP260566; FP292414; FP265414;
CL1716Contig1	FP272302; FP266551; FP297915; FP287372; FP256554; FP275514;
CL1718Contig1	FP295546; FP263222; FP266075; FP262851; FP264378;
CL171Contig1	FP281051; FP249547; FP257455; FP290496; FP256790; FP250248; FP292715; FP281445; FP274836; FP287699; FP289702; FP248062; FP247725; FP284457; FP255319; FP252748; FP250884; FP279314; FP249651; FP293908; FP252843; FP256528; FP279226; FP257286; FP295261; FP298251; FP282590; FP295493; FP253292; FP295610; FP281631; FP272974; FP257276; FP288639; FP250228; FP293475; FP294537; FP253457;
CL1721Contig1	FP258799; FP259306; FP259843; FP258652; FP258633; FP258972;
CL1723Contig1	FP250138; FP264421; FP268640; FP285627; FP251669; FP296779;
CL1727Contig1	FP262113; FP272189; FP262467; FP287846; FP268324; FP284537;
CL1730Contig1	FP264388; FP258529; FP267523; FP247507; FP261760; FP258602;
CL1733Contig1	FP261307; FP294930; FP261444; FP246390; FP263953; FP272507;
CL1736Contig1	FP278575; FP250099; FP253606; FP288374; FP296730; FP288997;
CL1739Contig1	FP268584; FP279093; FP256034; FP248182; FP266926; FP294427;
CL1743Contig1	FP276994; FP280679; FP273371; FP245815; FP281623; FP271495;
CL1746Contig1	FP255434; FP248121; FP269830; FP263847;
CL1746Contig2	FP267095; FP253726;
CL1749Contig1	FP251216; FP262603; FP280689; FP271526; FP308247; FP262602;
CL1752Contig1	FP304415; FP304460; FP298832; FP308340; FP306983; FP304705;
CL1756Contig1	FP268159; FP310175; FP291352; FP312377; FP303420; FP300922;
CL1759Contig1	FP273302; FP261134; FP270729; FP268383; FP280872; FP273301;
CL175Contig1	FP281455; FP293119; FP286710; FP291287; FP311716; FP293018; FP311242; FP310662; FP285346; FP254146; FP297015; FP281456; FP295505; FP298986; FP312439; FP311117; FP285347; FP293019; FP291288; FP254147; FP297016; FP256237; FP247585; FP285886; FP293120; FP251978; FP293933; FP257395; FP272900; FP255653; FP277363; FP285149; FP294736; FP294016; FP291359; FP281553; FP286711;
CL1761Contig1	FP255108; FP247908; FP279056; FP252383;
CL1761Contig2	FP278331; FP299284;
CL1763Contig1	FP256776; FP260266; FP266518; FP265346; FP284272; FP285025;
CL1767Contig1	FP256814; FP247807; FP276385; FP275990; FP250595; FP262474;
CL1770Contig1	FP271729; FP302925; FP272539; FP258441; FP284741;
CL1772Contig1	FP305637; FP293548; FP309751; FP304823; FP287685; FP259372;
CL1775Contig1	FP264305; FP261492; FP267293; FP280707; FP284812; FP309369;
CL1778Contig1	FP251730; FP261218; FP247000; FP306579; FP306093; FP260053;
CL177Contig1	FP295680; FP293887; FP287277; FP285936; FP289090; FP285869; FP253580; FP297523; FP262158; FP252736; FP251798; FP281071; FP251099; FP293447; FP308092; FP308894; FP275669; FP291565; FP293446; FP272738; FP266367; FP295679; FP301687; FP310716; FP270185; FP298908; FP299137; FP301366; FP252935; FP284932; FP291564; FP281070; FP305461; FP309891; FP305468; FP306122; FP299204;
CL1781Contig1	FP264223; FP290062; FP264618; FP266020; FP267165; FP290061;
CL1784Contig1	FP277978; FP265150; FP294806; FP294281; FP297041; FP269609;
CL1787Contig1	FP289006; FP269262; FP301207; FP249863; FP307176; FP307175;
CL1791Contig1	FP271145; FP266096; FP267866; FP262821; FP245717; FP266450;
CL1794Contig1	FP280321; FP264515; FP269806; FP282580; FP281815; FP264049;
CL1796Contig1	FP293702; FP250181; FP250544; FP271592; FP276637; FP293701;
CL179Contig1	FP271035; FP279985; FP251870; FP250657; FP289586; FP281472; FP250506; FP298094; FP250326; FP306661; FP310998; FP306408; FP312009; FP309927; FP311764; FP310976; FP312008; FP300786; FP274226; FP306582; FP307750; FP310630; FP310244; FP281471; FP304478; FP303487; FP311426; FP289585; FP298363; FP299971; FP258329; FP304912; FP298497; FP298093; FP309989; FP283044; FP279984;
CL17Contig1	FP283308; FP279219; FP295000; FP282678; FP286874; FP248474; FP250212; FP310434; FP303988; FP303960; FP302935; FP309095; FP302756; FP289359; FP301718; FP308432; FP302650; FP309548; FP305585; FP299371; FP301674; FP306944; FP312101; FP299533; FP305006; FP307519; FP302890; FP302331; FP301171; FP300283; FP299135; FP308736; FP299840; FP259189; FP304491; FP308253; FP308223; FP309526; FP248595; FP307449;…
CL1800Contig1	FP251908; FP281032; FP273337; FP292945; FP271802; FP284703;
CL1803Contig1	FP250518; FP298173; FP295879; FP293642; FP258904; FP260091;
CL1806Contig1	FP261478; FP270317; FP287173;
CL1806Contig2	FP266285; FP267837; FP265279;
CL1808Contig1	FP252886; FP277790; FP249633; FP255368; FP252122; FP281352;
CL1813Contig1	FP270639; FP294143; FP289706; FP296574; FP276627; FP279201;
CL1816Contig1	FP308217; FP299080; FP305758; FP302788; FP308066; FP308016;
CL1819Contig1	FP260944; FP267680; FP268685; FP254865; FP274884; FP289814;
CL1822Contig1	FP284095; FP291533; FP266540; FP291532; FP272347; FP296417;
CL1824Contig1	FP283129; FP251878; FP292877; FP293126; FP253082; FP286151;
CL1827Contig1	FP284987; FP252142; FP271558; FP255506; FP290850; FP284986;
CL1829Contig1	FP264110; FP264109; FP272554; FP247407; FP246976; FP270101;
CL182Contig1	FP294913; FP252514; FP255067; FP268034;
CL182Contig2	FP276764; FP290634; FP275441; FP279791; FP245661; FP256730; FP274378; FP275497; FP279792; FP282794; FP284356; FP252312; FP264085; FP282581;
CL182Contig3	FP258086; FP295094; FP286384; FP286383; FP290593; FP290653; FP280556; FP296493; FP253731; FP287030; FP296492; FP295093;
CL182Contig4	FP292197; FP275442; FP290635;
CL1833Contig1	FP266485; FP280748; FP251921; FP266267; FP263575; FP272832;
CL1836Contig1	FP287829; FP288110; FP250584; FP261906; FP270777; FP245706;
CL1839Contig1	FP260466; FP307135; FP260109; FP266668; FP253838; FP286617;
CL1842Contig1	FP285191; FP264024; FP265290; FP245767; FP268537; FP272293;
CL1845Contig1	FP285058; FP286869; FP254843; FP272226; FP292686; FP283924;
CL1848Contig1	FP286239; FP264493; FP286006; FP267645; FP310411; FP311033;
CL1852Contig1	FP253963; FP276848; FP265719; FP269988; FP251316; FP268017;
CL1855Contig1	FP297172; FP254637; FP272747; FP263466; FP277061; FP294105;
CL1858Contig1	FP274512; FP266324; FP263799; FP279509; FP274511; FP311113;
CL185Contig1	FP284278; FP284277; FP263940; FP257919; FP247499; FP278362; FP292461; FP292462; FP279144; FP292186; FP292185; FP279407; FP295340; FP254375; FP268985; FP295341; FP253402; FP250206; FP257215; FP283868; FP249635; FP294648; FP249732; FP250296; FP257672; FP278787; FP289093; FP279145; FP254376; FP247618; FP257414; FP252877; FP278363; FP295041; FP275588; FP279408;
CL1861Contig1	FP298577; FP277519; FP278742; FP278245; FP295660; FP277518;
CL1863Contig1	FP271985; FP283848; FP263780; FP289998; FP249137; FP269829;
CL1865Contig1	FP295129; FP261646; FP266830; FP261469; FP260731; FP260298;
CL1868Contig1	FP296376; FP253488; FP253352; FP250671; FP284042; FP294140;
CL1872Contig1	FP267762; FP271716;
CL1872Contig2	FP247275; FP280612; FP262254; FP309907;
CL1874Contig1	FP270457; FP287414; FP269099; FP248823; FP289077; FP281247;
CL1877Contig1	FP279977; FP251035; FP248485; FP294777; FP282624; FP281600;
CL1880Contig1	FP253791; FP268093; FP261580; FP275725; FP274937; FP282533;
CL1883Contig1	FP265021; FP276711; FP249725; FP274954; FP272497; FP264882;
CL1887Contig1	FP255250; FP288385; FP250282; FP275837; FP286779; FP279573;
CL1889Contig1	FP262635; FP263530; FP277748; FP262636; FP264078; FP289514;
CL188Contig1	FP278993; FP273622; FP254997; FP289473; FP264319; FP294514; FP277265; FP258868; FP310591; FP287192; FP296965; FP301447; FP302118; FP304776; FP304819; FP305707;
CL188Contig2	FP277266; FP287193; FP250214; FP296966;
CL188Contig3	FP283296; FP249174; FP281838; FP277449; FP293742; FP293148; FP298433; FP300785; FP266545; FP293147; FP293741; FP249173; FP288871;
CL188Contig4	FP305522; FP306021; FP305446;
CL1893Contig1	FP276699; FP264877; FP257022; FP272843; FP268955; FP261278;
CL1896Contig1	FP254428; FP279270; FP287686; FP288760; FP293549; FP252217;
CL1899Contig1	FP267591; FP247220; FP271687; FP252610; FP277567; FP266433;
CL1902Contig1	FP262659; FP256939; FP280854; FP262660; FP261830; FP275246;
CL1906Contig1	FP256615; FP291286; FP248091; FP264244; FP246886; FP291285;
CL1909Contig1	FP297039; FP247115; FP270732; FP246709; FP294243;
CL1913Contig1	FP264495; FP265408; FP245663; FP247428; FP250071; FP273214;
CL1916Contig1	FP289005; FP249905; FP254239; FP250643; FP279947; FP245798;
CL1919Contig1	FP281155; FP257110; FP249759; FP265020; FP260246; FP281154;
CL191Contig1	FP277636; FP252175; FP272969; FP278877; FP252862; FP257346; FP280950; FP274092; FP255855; FP254338; FP253255; FP252960; FP252848; FP251392; FP301803; FP253913; FP255919; FP287238; FP275714; FP251895; FP289214; FP307204; FP265295; FP249059; FP275737; FP275753; FP282561; FP291913; FP295949; FP256054; FP302945; FP274709; FP257429; FP285704; FP286615;
CL1921Contig1	FP246522; FP272893; FP263425; FP266902; FP266645; FP267330;
CL1924Contig1	FP260374; FP279754; FP246573; FP255796; FP266782; FP272831;
CL1927Contig1	FP294404; FP273503; FP246312; FP260347; FP273502; FP299483;
CL1929Contig1	FP268916; FP261513; FP297151; FP247079; FP298330; FP303631;
CL1933Contig1	FP294528; FP286574; FP249856; FP265443; FP247485; FP271962;
CL1935Contig1	FP269416; FP268806; FP291028; FP266667; FP293945; FP284114;
CL1938Contig1	FP288756; FP288755; FP252993; FP286685; FP279339; FP271912;
CL1941Contig1	FP266879; FP267556; FP246538; FP255094; FP267474; FP265268;
CL1945Contig1	FP267681; FP280833; FP266143; FP246734; FP299835; FP283479;
CL1947Contig1	FP248074; FP248231; FP250700; FP263866; FP246546; FP293086;
CL1950Contig1	FP249422; FP280581; FP269492; FP269454; FP284734; FP267520;
CL1953Contig1	FP270915; FP246140; FP247075; FP303844; FP251168; FP300100;
CL1956Contig1	FP287956; FP291112; FP245968; FP291155; FP276837; FP258157;
CL1959Contig1	FP257038; FP255056; FP289501; FP253030; FP294948; FP248274;
CL195Contig1	FP285021; FP255471; FP293657; FP297430; FP297429; FP303938; FP292228; FP255609; FP256986; FP303930; FP307374; FP304216; FP300795; FP301850; FP298976; FP298918; FP311014; FP305117; FP304541; FP309690; FP303149; FP311584; FP311060; FP249262; FP295738; FP306004; FP304556; FP307373; FP300322; FP295739; FP303298; FP285020;
CL195Contig2	FP245794; FP262386; FP267932;
CL1962Contig1	FP271520; FP292317; FP254149; FP252845; FP250895; FP253258;
CL1965Contig1	FP288504; FP275146; FP289587; FP292607; FP311717; FP299228;
CL1966Contig1	FP250450; FP303971; FP276660; FP247273; FP260552; FP249549;
CL1969Contig1	FP267006; FP257541; FP259225; FP264863; FP259660; FP259626;
CL1972Contig1	FP268224; FP251079; FP295902; FP289965; FP294169; FP276482;
CL1977Contig1	FP264323; FP263335; FP295929; FP250460; FP253803; FP295932;
CL1980Contig1	FP250653; FP275080; FP287439; FP297467; FP250328; FP286968;
CL1983Contig1	FP295890; FP255335; FP256172; FP266495; FP269086; FP307686;
CL1985Contig1	FP271056; FP262123; FP254306; FP275109; FP264958; FP265847;
CL1989Contig1	FP277239; FP265054; FP267398; FP246720; FP272643; FP290647;
CL198Contig1	FP284153; FP282972; FP257292; FP257079; FP282668; FP283521; FP256658; FP256441; FP254427; FP291350; FP250933; FP277870; FP280893; FP255384; FP291199; FP254553; FP280009; FP295637; FP295780; FP309896; FP279419; FP304377; FP298398; FP270183; FP275907; FP276405; FP293600;
CL198Contig2	FP282971; FP254426; FP310602; FP259180; FP283520; FP308257; FP282667;
CL1992Contig1	FP248310; FP254438; FP307976; FP276933; FP254439; FP296716;
CL1995Contig1	FP271008; FP246844; FP268678; FP291280; FP276982; FP264065;
CL1998Contig1	FP254064; FP289279; FP294338; FP270435; FP284687;
CL19Contig1	FP284130; FP277169; FP295187; FP277915; FP285050; FP284013; FP277206; FP273208; FP254576; FP282854; FP279798; FP280212; FP278708; FP298311; FP278910; FP281793; FP279508; FP273884; FP248520; FP283247; FP295458; FP282836; FP249502; FP249607; FP296305; FP293900; FP297118; FP280442; FP282827; FP296636; FP279873; FP273298; FP289668; FP274561; FP254913; FP285043; FP278781; FP293961; FP273596; FP279220;…
CL2001Contig1	FP287399; FP310050; FP310132; FP310005; FP258615; FP310152;
CL2004Contig1	FP249348; FP262058; FP280424; FP281435; FP278522;
CL2007Contig1	FP267375; FP247226; FP271401; FP276749; FP260201; FP264889;
CL2010Contig1	FP271349; FP250952; FP271092; FP267827; FP272702; FP288010;
CL2013Contig1	FP269872; FP278448; FP288303; FP311016; FP276587; FP259886;
CL2016Contig1	FP262831; FP312011; FP284956; FP261746; FP274554;
CL2019Contig1	FP289260; FP256280; FP257370; FP255976; FP256847; FP292994;
CL201Contig1	FP298583; FP248716; FP286763; FP307081; FP304058; FP310011; FP311221; FP310703; FP310589; FP307830; FP306493; FP308052; FP305336; FP300110; FP259149; FP298501; FP248715; FP307112; FP306835; FP302003; FP304473;
CL201Contig2	FP296934; FP260873; FP263525; FP263469; FP308691; FP308434; FP303017; FP308264; FP308137; FP306478; FP312541; FP302209; FP259554;
CL2022Contig1	FP276273; FP273473; FP282802; FP273588; FP291956; FP295582;
CL2025Contig1	FP288307; FP273541; FP273542; FP260739; FP249840; FP294193;
CL2028Contig1	FP268817; FP303399; FP277254; FP300993; FP308856; FP279301;
CL2031Contig1	FP260849; FP268132; FP246423; FP246263; FP246322; FP274629;
CL2033Contig1	FP276624; FP267037; FP252954; FP245743; FP246636; FP278854;
CL2035Contig1	FP268533; FP270663; FP272742; FP246608; FP247037; FP283232;
CL2038Contig1	FP276136; FP295518; FP267054; FP272140; FP266691; FP276135;
CL2042Contig1	FP292190; FP295662; FP269918; FP263862; FP261844; FP272628;
CL2045Contig1	FP283379; FP248518; FP272206; FP268732; FP284723; FP299282;
CL2048Contig1	FP265558; FP270428; FP260248; FP280867; FP272053;
CL204Contig1	FP249620; FP279650; FP294262; FP255070; FP272714; FP262088; FP247324; FP261463; FP305818; FP290423; FP301891; FP307564; FP299796; FP307736; FP258338; FP300044; FP311007; FP300139; FP300768; FP307563; FP299659; FP299895; FP308332; FP298993; FP303181; FP307110; FP300073; FP279649; FP299250; FP299017; FP303061; FP306372; FP299811; FP306549;
CL2051Contig1	FP266292; FP265628; FP271915; FP265032;
CL2054Contig1	FP264589; FP265527; FP287844; FP276506; FP269278;
CL2057Contig1	FP285116; FP260947; FP309865; FP273727; FP295552;
CL2059Contig1	FP257859; FP267139; FP311742; FP297815; FP299308;
CL2062Contig1	FP272531; FP294314; FP261405; FP287832;
CL2065Contig1	FP266134; FP251015; FP263048; FP289942; FP263047;
CL2068Contig1	FP254544; FP295138; FP295291; FP298108; FP289624;
CL2071Contig1	FP259352; FP246173; FP257396; FP268894; FP292478;
CL2074Contig1	FP266565; FP271502; FP272838; FP269702; FP276498;
CL2077Contig1	FP291053; FP253808; FP247506; FP250420; FP307084;
CL207Contig1	FP277100; FP278115; FP291194; FP280307; FP281026; FP274478; FP256522; FP297537; FP254167; FP295507; FP249569; FP279260; FP254040; FP274695; FP259381; FP250731; FP278851; FP258532; FP248214; FP261106; FP311636; FP311618; FP256463; FP286110; FP311144; FP298565; FP280306; FP299309; FP281025; FP301032; FP254039; FP295506; FP278114;
CL2080Contig1	FP261183; FP261892; FP268567; FP267873; FP288196;
CL2083Contig1	FP261010; FP265540; FP288646; FP287782; FP266699;
CL2086Contig1	FP272551; FP287354; FP287473; FP298029; FP277782;
CL2089Contig1	FP252859; FP286176; FP271518; FP271542;
CL2092Contig1	FP284248; FP277781; FP287472; FP287353; FP298028;
CL2095Contig1	FP249540; FP268277;
CL2095Contig2	FP272044; FP278922;
CL2098Contig1	FP271275; FP304663; FP309730; FP286103; FP295068;
CL2101Contig1	FP263703; FP296679; FP264398; FP260154; FP296680;
CL2105Contig1	FP269414; FP262560; FP271843; FP266365; FP274291;
CL2108Contig1	FP261001; FP286609; FP261755; FP308216; FP252438;
CL210Contig1	FP260752; FP307672; FP309836; FP302328; FP302436; FP303133; FP301112; FP302982; FP307752; FP303550; FP306360; FP303711; FP301766; FP303460; FP308173; FP303970; FP307949; FP298581; FP301473; FP300225; FP302635; FP298589; FP303439; FP306963; FP302905; FP300978; FP299544; FP308313; FP307955; FP299467; FP303378; FP301672; FP305019;
CL2110Contig1	FP303529; FP263153; FP245627; FP263154; FP294342;
CL2113Contig1	FP267341; FP272786; FP309359; FP306602; FP305828;
CL2117Contig1	FP271108; FP246437; FP271854; FP263214; FP266999;
CL2120Contig1	FP268594; FP245756; FP267888; FP271531; FP302748;
CL2123Contig1	FP261551; FP285024; FP285635; FP248867; FP294448;
CL2126Contig1	FP260802; FP250577; FP292129; FP263316; FP287677;
CL2129Contig1	FP246083; FP255984; FP265141; FP284566; FP276831;
CL2132Contig1	FP273082; FP262032; FP312474; FP310926; FP310675;
CL2135Contig1	FP271136; FP290991; FP246705; FP263751; FP295262;
CL2138Contig1	FP308109; FP308956; FP304975;
CL213Contig1	FP285156; FP277353; FP277905; FP291586; FP291856; FP281323; FP250170; FP254741; FP256341; FP248549; FP252468; FP257625; FP301863; FP277352; FP299108; FP291585; FP284705; FP294017; FP292026; FP291855; FP278307; FP252467; FP260066; FP259457; FP259308; FP259311; FP259017; FP258474; FP258262; FP258229; FP258335; FP258246;
CL2141Contig1	FP260173; FP249926; FP264295; FP274647; FP280427;
CL2144Contig1	FP266847; FP268726; FP265345; FP247957; FP280857;
CL2146Contig1	FP269322; FP276853; FP303134; FP256174; FP294596;
CL2149Contig1	FP251060; FP266264;
CL2152Contig1	FP269979; FP287171; FP288502; FP289154; FP269965;
CL2155Contig1	FP257279; FP310505; FP268639; FP272506; FP310761;
CL2158Contig1	FP280865; FP263497; FP287787; FP277002; FP288796;
CL2161Contig1	FP252869; FP290441; FP264588; FP275888; FP288476;
CL2164Contig1	FP255834; FP261459; FP291048; FP273033; FP288564;
CL2166Contig1	FP269675; FP285769; FP265792; FP288033; FP292812;
CL2169Contig1	FP248185; FP281922; FP293827; FP293954; FP296611;
CL216Contig1	FP273146; FP273283; FP271405; FP273085; FP291382; FP249353; FP253397; FP252490; FP250806; FP282129; FP307414; FP257194; FP303016; FP302964; FP301942; FP305727;
CL216Contig2	FP309473; FP249352; FP305942; FP309805; FP252489; FP300756; FP311145; FP299235; FP300393; FP302902; FP273084; FP311373; FP308454; FP307096; FP306217; FP304314;
CL2171Contig1	FP289036; FP296106; FP295003; FP297897; FP272040;
CL2175Contig1	FP271193; FP268718; FP265668; FP270111;
CL2177Contig1	FP270278; FP247271; FP262110; FP247183; FP287016;
CL2180Contig1	FP295962; FP251220; FP262335; FP259990; FP294546;
CL2184Contig1	FP264725; FP274928; FP266704; FP277515; FP290648;
CL2187Contig1	FP250295; FP261487; FP289243; FP253822; FP271955;
CL2191Contig1	FP251017; FP261338; FP264638; FP246477; FP268492;
CL2194Contig1	FP262644; FP264724; FP252101; FP285819; FP289189;
CL2197Contig1	FP310100; FP296038; FP262984; FP302806; FP295646;
CL219Contig1	FP246806; FP263810; FP247188; FP268412; FP311361;
CL219Contig2	FP277942; FP284961; FP277889; FP281552; FP286062; FP277372; FP273453; FP287226; FP289470; FP305579; FP283946; FP295842; FP277118; FP281551; FP296690; FP286943; FP308176; FP300202; FP289469; FP306359; FP283945; FP277371; FP308608; FP258028; FP306819; FP304482;
CL2200Contig1	FP267502; FP284659; FP255986; FP272362; FP270770;
CL2201Contig1	FP260639; FP272254; FP264307; FP261980; FP266211;
CL2204Contig1	FP263965; FP262352; FP265084;
CL2204Contig2	FP260897; FP280764;
CL2207Contig1	FP271594; FP263375; FP245617; FP294872; FP302402;
CL2210Contig1	FP271048; FP246777; FP272750; FP280662; FP287148;
CL2213Contig1	FP270875; FP268581; FP271470; FP272573; FP296860;
CL2216Contig1	FP273549; FP265624; FP287049; FP248343; FP270466;
CL2219Contig1	FP270136; FP253541; FP290186; FP272791; FP276969;
CL2222Contig1	FP271940; FP269876; FP272407; FP278230; FP280562;
CL2225Contig1	FP271043; FP260127; FP282919; FP254413; FP292155;
CL2228Contig1	FP255959; FP264763; FP264206; FP283706; FP283705;
CL222Contig1	FP282449; FP312359; FP247858; FP283282; FP295814; FP252322; FP280041; FP303933; FP282179; FP295027; FP311539; FP275389; FP285735; FP312360; FP311385; FP282180; FP293884; FP284372; FP295815; FP254697; FP247859; FP285749; FP293760; FP283283; FP255191; FP277235; FP280042; FP252323; FP298213; FP282450; FP295028; FP284005;
CL2232Contig1	FP276000; FP276367; FP262703; FP276368; FP276001;
CL2235Contig1	FP269919; FP266519; FP253128; FP291089; FP269326;
CL2239Contig1	FP255521; FP271811; FP274067; FP284715;
CL2241Contig1	FP253081; FP261561; FP260411; FP288440; FP247208;
CL2245Contig1	FP271984; FP260483; FP262072; FP269716; FP279257;
CL2248Contig1	FP286049; FP289901; FP260149; FP264972; FP294213;
CL2251Contig1	FP271647; FP272475; FP276621; FP270486; FP291150;
CL2254Contig1	FP266106; FP265192; FP261623; FP307216; FP277357;
CL2257Contig1	FP287827; FP258961; FP269794; FP296063; FP249733;
CL225Contig1	FP279837; FP285960; FP295877; FP289904; FP283034; FP282536; FP281002; FP282537; FP291574; FP281395; FP289327; FP288541; FP253270; FP267478; FP272722; FP267035; FP289905; FP277273; FP256499; FP248158; FP245996; FP281003; FP296080; FP279838; FP289328; FP283035; FP285345; FP291575; FP281396; FP285961; FP295878;
CL2260Contig1	FP292563; FP290610; FP286821; FP292564; FP307847;
CL2261Contig1	FP307177; FP269282; FP305850; FP274978; FP287705;
CL2266Contig1	FP300725; FP262168; FP267215; FP287333; FP295452;
CL2267Contig1	FP256315; FP293319;
CL2267Contig2	FP287794; FP267056; FP282280;
CL226Contig1	FP305751; FP257566; FP303876; FP311928; FP293320; FP311927; FP287568; FP284947; FP249310; FP282635; FP295234; FP302615; FP311800;
CL226Contig2	FP284948; FP300748; FP287569; FP293321; FP297036; FP282090; FP248588; FP293199; FP295235; FP254844; FP255567; FP250320; FP282636; FP249311; FP254254; FP308335; FP306846; FP308078;
CL2270Contig1	FP275553; FP264003; FP276776; FP246969; FP282236;
CL2273Contig1	FP302593; FP264190; FP287702; FP294818; FP300146;
CL2276Contig1	FP279546; FP293516; FP289641; FP273583; FP296654;
CL2279Contig1	FP249697; FP272364; FP260984; FP268785; FP303565;
CL2282Contig1	FP279391; FP285513; FP253328; FP293544; FP291469;
CL2285Contig1	FP285507; FP267124; FP287763; FP284125; FP270748;
CL2288Contig1	FP290180; FP273806; FP295424; FP296167; FP259801;
CL2291Contig1	FP271097; FP248650; FP263538; FP263293; FP277713;
CL2294Contig1	FP262066; FP262656; FP268189; FP267521; FP297272;
CL2297Contig1	FP253219; FP264563; FP277075; FP309629; FP286225;
CL22Contig1	FP273608; FP258525; FP258804; FP259358; FP259422; FP259354; FP259032; FP258826; FP259738; FP258930; FP279971; FP282737; FP258626; FP258725; FP259785; FP259037; FP259230; FP259128; FP258933; FP259186; FP259830; FP259859; FP258679; FP258859; FP259869; FP259735; FP259899; FP258291; FP260008; FP259565; FP268287; FP260087; FP258374; FP269253; FP260068; FP253201; FP259443; FP259999; FP259191; FP258281;…
CL2300Contig1	FP267105; FP265174; FP253079; FP262183; FP309039;
CL2304Contig1	FP264001; FP268285; FP292541; FP272537; FP265379;
CL2306Contig1	FP273169; FP296153; FP297047; FP296154; FP285435;
CL2309Contig1	FP253763; FP256028; FP267484; FP292225; FP295107;
CL230Contig1	FP289247; FP285973; FP276148; FP248874; FP286341; FP253306; FP290782; FP281642; FP291675; FP255790; FP294030; FP284437; FP258608; FP263864; FP273795; FP269193; FP304740; FP300280; FP275430; FP276147; FP286340; FP253344; FP284436; FP305851; FP281641; FP289620; FP275429; FP308779; FP298814; FP291674; FP294029;
CL2313Contig1	FP298218; FP268778; FP246551; FP246958; FP298217;
CL2316Contig1	FP263610; FP272802; FP270597; FP247779; FP291844;
CL2319Contig1	FP252431; FP261089; FP301935; FP303451; FP306859;
CL2322Contig1	FP282103; FP250914; FP292586; FP277876; FP287949;
CL2325Contig1	FP264940; FP272887; FP260757; FP266733; FP264528;
CL2328Contig1	FP270396; FP285431; FP261114; FP246094; FP268170;
CL2331Contig1	FP246867; FP312056; FP267161; FP276580; FP271257;
CL2334Contig1	FP248186; FP266028; FP245916; FP296612; FP293828;
CL2336Contig1	FP253133; FP251968; FP266214; FP249114; FP248940;
CL2339Contig1	FP260262; FP247141; FP272314; FP253172; FP265928;
CL233Contig1	FP248106; FP278058; FP283334; FP254884; FP297636; FP257609; FP276275; FP278929; FP279436; FP250730; FP294986; FP304454; FP286857; FP286784; FP296580; FP275247; FP259537;
CL233Contig2	FP286856; FP297635; FP255184; FP283333; FP247631; FP301798; FP298315; FP260061; FP270526; FP311212; FP310671;
CL2343Contig1	FP246751; FP253205; FP261624; FP276185; FP264181;
CL2346Contig1	FP274185; FP288980; FP288282; FP296266; FP293560;
CL2349Contig1	FP272277; FP272175; FP266265; FP246772; FP287897;
CL2352Contig1	FP250519; FP251728; FP261786; FP263361; FP279600;
CL2355Contig1	FP273518; FP290753; FP277696; FP257582; FP288274;
CL2358Contig1	FP259427; FP267854; FP297113; FP259839; FP259074;
CL235Contig1	FP288291; FP246764; FP248512; FP282051; FP272986; FP299555; FP283585; FP310374; FP299361; FP295861; FP250972; FP303650; FP300216; FP303784; FP302164; FP304167; FP311290; FP290064; FP309917; FP311532; FP257927; FP306477; FP258376; FP303446; FP301865; FP249306; FP303126; FP309543; FP281160; FP305388;
CL2361Contig1	FP274618; FP267280; FP286761; FP266855; FP272077;
CL2364Contig1	FP277989; FP269152; FP276581; FP275556; FP279681;
CL2367Contig1	FP273201; FP294895; FP263813; FP294350; FP287994;
CL2370Contig1	FP253504; FP255275; FP283810; FP261947; FP246190;
CL2373Contig1	FP247365; FP254453; FP257445; FP262557; FP268454;
CL2376Contig1	FP263413; FP285236; FP247704; FP248486; FP264570;
CL2379Contig1	FP273756; FP259126; FP260100; FP273755; FP310740;
CL2380Contig1	FP261423; FP268909; FP269503; FP250557; FP265991;
CL2383Contig1	FP260792; FP304730; FP257895; FP300449; FP258011;
CL2386Contig1	FP253422; FP302418; FP296322; FP271757; FP302753;
CL2389Contig1	FP296250; FP260371; FP289877; FP298894; FP307872;
CL2392Contig1	FP266396; FP267389; FP296174; FP292421; FP304596;
CL2395Contig1	FP265593; FP263697; FP258032; FP276478; FP298799;
CL2398Contig1	FP285094; FP256410; FP252357; FP294158; FP279992;
CL239Contig1	FP291865; FP247795; FP249210; FP250502; FP307108; FP309417; FP282910; FP305746; FP297702; FP308246; FP290784; FP291864; FP253713; FP301255; FP300811; FP277642; FP278809; FP289166; FP277444; FP299340; FP248154; FP304183; FP306404; FP305407; FP305518; FP307470; FP293726; FP310511; FP247794; FP307756;
CL2401Contig1	FP261798; FP264798; FP265281; FP303910; FP289207;
CL2404Contig1	FP246401; FP261725; FP264060; FP264061; FP284344;
CL2407Contig1	FP265258; FP260819; FP245998; FP267848; FP271445;
CL2410Contig1	FP276956; FP276481; FP293982; FP311773; FP273164;
CL2413Contig1	FP272812; FP267989; FP247364; FP247293; FP268609;
CL2415Contig1	FP260687; FP245693; FP269208; FP260837; FP310916;
CL2418Contig1	FP285331; FP248096; FP260194; FP256202; FP311915;
CL2420Contig1	FP256059; FP257884; FP307366; FP253076; FP307365;
CL2424Contig1	FP250408; FP276898; FP262497; FP261369; FP265614;
CL2427Contig1	FP250791; FP275614; FP248302; FP276308; FP276042;
CL242Contig1	FP281812; FP288151; FP295026; FP297620; FP249458; FP247949; FP252347; FP279563; FP300148; FP257699; FP303096; FP257430; FP269940; FP271004; FP309561; FP302316; FP299458; FP253149; FP312433; FP281095; FP300466; FP301427; FP303372; FP308583; FP300332; FP303628; FP304133; FP302424; FP297619; FP300857;
CL2430Contig1	FP271065; FP250406; FP283922;
CL2430Contig2	FP260596; FP268742;
CL2433Contig1	FP276267; FP287496; FP299768; FP286139; FP276266;
CL2435Contig1	FP252660; FP307250; FP275868; FP307251; FP288103;
CL2437Contig1	FP257214; FP248852; FP260161; FP292899;
CL2440Contig1	FP275800; FP283558; FP255946; FP286905; FP289578;
CL2443Contig1	FP257182; FP269396; FP272581; FP283947; FP265415;
CL2447Contig1	FP274819; FP271956; FP256504; FP291143; FP292413;
CL2450Contig1	FP251191; FP297776; FP283070; FP270985; FP246854;
CL2453Contig1	FP281397; FP291644; FP248662; FP309482; FP291645;
CL2456Contig1	FP247401; FP261680; FP251776; FP297330; FP274540;
CL2459Contig1	FP264070; FP301283; FP298529; FP306418; FP304988;
CL2462Contig1	FP264971; FP271866; FP269442; FP277043; FP270955;
CL2465Contig1	FP277176; FP260184; FP268576; FP245595; FP269083;
CL2468Contig1	FP271792; FP274231; FP262232; FP311035; FP310795;
CL246Contig1	FP254292; FP254903; FP277341; FP255444; FP289042; FP296765; FP296477; FP248373; FP287683; FP297440; FP286008; FP275730; FP273245; FP285789; FP281711; FP286085; FP255848; FP250394; FP294063; FP275603; FP280405; FP285184; FP297072; FP254229; FP284012; FP248049; FP281106; FP249392; FP286708;
CL2471Contig1	FP306235; FP305383; FP303137; FP301504; FP305813;
CL2473Contig1	FP308206; FP262607; FP255763; FP262606; FP284325;
CL2477Contig1	FP260706; FP265937; FP263776; FP264686; FP269078;
CL2479Contig1	FP247390; FP279007; FP268232; FP292273; FP270590;
CL2483Contig1	FP285512; FP265485; FP290981; FP246535; FP265989;
CL2486Contig1	FP273819; FP261649; FP269996; FP276750; FP294257;
CL2489Contig1	FP268848; FP270271; FP265691; FP261081; FP311094;
CL2491Contig1	FP265563; FP279494; FP294334; FP263169; FP275763;
CL2495Contig1	FP266403; FP265783; FP260954; FP266517; FP267032;
CL2498Contig1	FP274222; FP257520; FP291893; FP282611; FP280200;
CL2501Contig1	FP246291; FP262463; FP246062; FP266144; FP270739;
CL2504Contig1	FP277218; FP252399; FP281978; FP286883; FP255593;
CL2508Contig1	FP261590; FP267173; FP288364; FP267465; FP268299;
CL2511Contig1	FP267425; FP266653; FP277039; FP253930; FP273203;
CL2514Contig1	FP280790; FP263788; FP260208; FP272601; FP294033;
CL2517Contig1	FP261120; FP265978; FP268168; FP267975; FP268835;
CL251Contig1	FP287200; FP254558; FP278414; FP287309; FP253341; FP295317; FP285386; FP249565; FP290553; FP253210; FP291925; FP286005; FP274112; FP284074; FP288499; FP256725; FP287308; FP266227; FP267409; FP298206; FP297163; FP286004; FP290552; FP295316; FP297162; FP284893; FP249564; FP288498; FP298205;
CL2520Contig1	FP291509; FP280005; FP288832; FP277987; FP306386;
CL2523Contig1	FP262832; FP265179; FP262561; FP267378; FP312012;
CL2526Contig1	FP270039; FP290929; FP266865; FP271249; FP289138;
CL2529Contig1	FP261584; FP247503; FP261903; FP276421; FP271230;
CL2532Contig1	FP268124; FP260635; FP272283; FP270448;
CL2536Contig1	FP264233; FP269089; FP261558; FP287564; FP246602;
CL2539Contig1	FP266728; FP245598; FP267824; FP246500; FP300070;
CL2542Contig1	FP269700; FP257097; FP261566; FP277545;
CL2545Contig1	FP286667; FP272126; FP272548; FP246985; FP293158;
CL2548Contig1	FP272920; FP262107; FP264120; FP290918; FP272919;
CL254Contig1	FP284953; FP282566; FP272947; FP281507; FP248544; FP288396; FP275821; FP250495; FP296280; FP288890; FP282686; FP251424; FP292774; FP259898; FP259814; FP255231; FP254267; FP288889; FP266105; FP292773; FP311131; FP254266; FP272946; FP309217; FP282685; FP284952; FP306468; FP305046; FP282565;
CL2550Contig1	FP278425; FP265259; FP256572; FP254172; FP295231;
CL2554Contig1	FP284396; FP287823; FP269237; FP265598; FP284395;
CL2556Contig1	FP265486; FP256779; FP266476; FP283353; FP290783;
CL2559Contig1	FP251512; FP267176; FP290709; FP255709; FP287631;
CL2562Contig1	FP264817; FP260620; FP291127; FP291180; FP288049;
CL2566Contig1	FP294450; FP290224; FP247693; FP288555; FP268000;
CL2569Contig1	FP274402; FP288407; FP268531; FP262215; FP294144;
CL256Contig1	FP282930; FP289810; FP255359; FP278312; FP280192; FP255436; FP292677; FP270775; FP251419; FP255606; FP290167; FP265323; FP293213; FP275786; FP275194; FP255779; FP262516; FP268495; FP268301; FP282929; FP280191; FP275785; FP278311; FP259583; FP289809; FP259811; FP290166; FP292676;
CL2572Contig1	FP268440; FP265428; FP267332; FP263844; FP272112;
CL2575Contig1	FP279148; FP253571; FP251073; FP257143; FP295100;
CL2578Contig1	FP283684; FP287680; FP266066; FP266920; FP264506;
CL2581Contig1	FP264420; FP291165; FP270328; FP257281; FP270517;
CL2584Contig1	FP249297; FP308620; FP282837; FP282838; FP248204;
CL2586Contig1	FP276566; FP270174; FP254831; FP251868; FP246109;
CL2589Contig1	FP293643; FP256748; FP298174; FP295880; FP290003;
CL2592Contig1	FP297586; FP270096; FP294515; FP291266; FP257993;
CL2595Contig1	FP260951; FP307411; FP267366; FP246214; FP260331;
CL2598Contig1	FP297020; FP271632; FP265853; FP309335; FP312444;
CL259Contig1	FP282723; FP255847; FP250118; FP252012; FP257732; FP288965; FP286782; FP293932; FP295548; FP281110; FP256567; FP272504; FP251786; FP271360; FP266500; FP254487; FP282744; FP295547; FP286781; FP295083; FP300452; FP265749; FP250531; FP248189; FP311627; FP281109; FP288964; FP293931;
CL2601Contig1	FP266878; FP252038; FP268781; FP304046; FP297865;
CL2604Contig1	FP248032; FP272385; FP295307; FP262145; FP300861;
CL2607Contig1	FP271269; FP311899; FP277644; FP311900; FP295771;
CL2610Contig1	FP310214; FP284468; FP283505; FP296230; FP290065;
CL2613Contig1	FP272669; FP256993; FP268880; FP296460; FP281215;
CL2616Contig1	FP261297; FP247224; FP282038; FP255885; FP289444;
CL2619Contig1	FP279212; FP295197; FP289679; FP292443; FP292259;
CL2622Contig1	FP298168; FP270469; FP254148; FP256625; FP292316;
CL2624Contig1	FP248769; FP283931; FP292807; FP251037; FP293415;
CL2626Contig1	FP245614; FP251368; FP260476; FP270564; FP301921;
CL262Contig1	FP277552; FP277437; FP279397; FP282692; FP297912; FP285945; FP292867; FP303029; FP303311; FP249973; FP306169; FP308100; FP312077; FP302692; FP299479; FP303499; FP302834; FP310349; FP301627; FP303048; FP258101; FP258131; FP308813; FP302667; FP307459; FP312078; FP301180; FP303851;
CL2630Contig1	FP257035; FP296799; FP279200; FP249794; FP275412;
CL2633Contig1	FP266717; FP276857; FP287816; FP264376; FP278992;
CL2636Contig1	FP271223; FP246565; FP271958; FP294406; FP276152;
CL2639Contig1	FP257304; FP290972; FP247455; FP265599; FP268303;
CL2643Contig1	FP266117; FP264004; FP260899; FP262523; FP276768;
CL2646Contig1	FP246149; FP247162; FP247093; FP296364; FP283323;
CL2649Contig1	FP266065; FP271838; FP295325; FP278953; FP283173;
CL2652Contig1	FP263182; FP265417; FP263183; FP247325; FP272745;
CL2655Contig1	FP294477; FP247241; FP268395; FP271115;
CL2658Contig1	FP268026; FP289880; FP290365; FP295218;
CL265Contig1	FP253211; FP292489; FP294915; FP273193; FP278136; FP284403; FP255452; FP298062; FP295906; FP278796; FP250813; FP252847; FP256734; FP254573; FP256923; FP257835; FP311010; FP310771; FP273192; FP278795; FP273394; FP312209; FP273393; FP303479; FP311062; FP310724; FP256443; FP298061;
CL2661Contig1	FP281533; FP248700; FP281532; FP310309;
CL2662Contig1	FP252650; FP255450; FP253856; FP255671;
CL2666Contig1	FP260240; FP252733; FP258333; FP283803;
CL2669Contig1	FP296368; FP255333; FP282348; FP262135;
CL2672Contig1	FP271478; FP262552; FP269362; FP279819;
CL2675Contig1	FP258221; FP259904; FP259922; FP270539;
CL2678Contig1	FP251422; FP250399; FP250062; FP251081;
CL267Contig1	FP309704; FP268331; FP287755; FP250014; FP261617; FP261852; FP262075; FP264133; FP262392; FP291847; FP298377; FP282330; FP300407; FP303520; FP304141; FP248024; FP291846; FP302170; FP300676; FP310227; FP299885; FP310762; FP304147; FP299492; FP308747; FP275597; FP275596;
CL2681Contig1	FP256976; FP275766; FP256350; FP292875;
CL2684Contig1	FP266541; FP284724; FP260455; FP265206;
CL2688Contig1	FP270712; FP252369; FP257542; FP246193;
CL2691Contig1	FP271947; FP268394; FP281372; FP270548;
CL2695Contig1	FP267549; FP266993; FP246439; FP264374;
CL2698Contig1	FP263436; FP307114; FP301338; FP260132;
CL26Contig1	FP280351; FP255670; FP279425; FP283539; FP248908; FP253894; FP256013; FP278691; FP298024; FP285082; FP254655; FP288689; FP248985; FP279446; FP308740; FP310576; FP305582; FP306536; FP310815; FP288688; FP280350; FP248907; FP283538; FP279424;
CL26Contig2	FP277191; FP284380; FP278012; FP285490; FP290319; FP297622; FP254781; FP310135; FP248308; FP287466; FP296306; FP283146; FP286985; FP302698; FP302508; FP274069; FP297541; FP275087; FP274132; FP251784; FP251244; FP250096; FP289478; FP248562; FP255877; FP293123; FP300482; FP298323; FP304378; FP301615; FP300899; FP299499; FP250247; FP257049; FP311891; FP305269; FP255803; FP305037; FP298509; FP303788;…
CL2700Contig1	FP268980; FP272610; FP279332; FP279554;
CL2703Contig1	FP268804; FP267915; FP260889; FP280680;
CL2706Contig1	FP267444; FP262303; FP294436; FP268188;
CL2709Contig1	FP303887; FP247305; FP274382; FP288035;
CL2711Contig1	FP245897; FP272500; FP256014; FP267271;
CL2716Contig1	FP266425; FP266568; FP291049; FP292034;
CL2719Contig1	FP262105; FP277672; FP266417; FP258249;
CL2721Contig1	FP262673; FP249617; FP274093; FP275655;
CL2725Contig1	FP245723; FP276761; FP247563; FP264064;
CL2728Contig1	FP285439; FP251195; FP279267; FP297159;
CL272Contig1	FP246397; FP279429; FP278462; FP292397; FP292396; FP306193; FP306158; FP281462; FP274900; FP302198; FP279253; FP311164; FP311411; FP270244; FP245942; FP298361; FP274901; FP309901; FP249841; FP279254; FP296668; FP256477; FP256940; FP291646; FP281463; FP293821;
CL2731Contig1	FP269488; FP286466; FP264380; FP247288;
CL2734Contig1	FP287820; FP253733; FP297114; FP271666;
CL2737Contig1	FP268650; FP251154; FP250964; FP306770;
CL2740Contig1	FP279101; FP274799; FP247964; FP301492;
CL2743Contig1	FP247329; FP286804; FP284238; FP268477;
CL2745Contig1	FP279507; FP295329; FP258123; FP285829;
CL2748Contig1	FP264031; FP281514; FP260764; FP269682;
CL2751Contig1	FP281489; FP247186; FP265921; FP302348;
CL2755Contig1	FP256605; FP267117; FP294976;
CL2758Contig1	FP254611; FP246380; FP309453; FP296960;
CL275Contig1	FP278631; FP283586; FP288875; FP296286; FP294473; FP289629; FP292399; FP251485; FP296268; FP292029; FP249371; FP253806; FP272183; FP254302; FP272224; FP272637; FP292398; FP248015; FP288821; FP288820; FP288874; FP255158; FP296267; FP289628; FP301370; FP300958; FP249370;
CL2761Contig1	FP247069; FP254580; FP272410; FP268427;
CL2764Contig1	FP255725; FP245567; FP269354; FP287939;
CL2767Contig1	FP293390; FP280410; FP300498; FP307836;
CL2770Contig1	FP249992; FP254250; FP270226; FP277791;
CL2773Contig1	FP261639; FP270646; FP281054; FP292115;
CL2776Contig1	FP250892; FP276737; FP248005; FP288665;
CL277Contig1	FP251839; FP272139; FP294227; FP298697; FP251242; FP289433; FP258206; FP304782; FP303905; FP306674; FP307896; FP307970; FP308758; FP302855; FP304304; FP302005; FP304210; FP300985; FP258530; FP303301; FP307681; FP302411; FP295756; FP306067; FP310938; FP292226;
CL2780Contig1	FP277961; FP294916; FP251053; FP288350;
CL2783Contig1	FP272744; FP262378; FP276557; FP270321;
CL2786Contig1	FP261824; FP267574; FP296284; FP271012;
CL2789Contig1	FP245757; FP286496; FP276681; FP309612;
CL2792Contig1	FP265724; FP267021; FP267467; FP294336;
CL2796Contig1	FP276683; FP303167; FP300157; FP300434;
CL2799Contig1	FP273546; FP267773; FP295993; FP285812;
CL2801Contig1	FP272423; FP264182; FP270886; FP271907;
CL2804Contig1	FP260461; FP300936; FP301502; FP300997;
CL2807Contig1	FP291184; FP245802;
CL2807Contig2	FP267737; FP271385;
CL280Contig1	FP257649; FP263597; FP289140; FP303015; FP303217; FP300999;
CL280Contig2	FP282887; FP296817; FP253885; FP275058;
CL280Contig3	FP299089; FP258009; FP301544; FP307239; FP285974; FP272158; FP289790; FP309436; FP284162; FP248043; FP285975; FP251340; FP292579;
CL280Contig4	FP289141; FP291339;
CL2810Contig1	FP288436; FP288435; FP274235; FP303010;
CL2812Contig1	FP283527; FP256952; FP264262; FP288629;
CL2815Contig1	FP266045; FP284602; FP311896; FP311897;
CL2818Contig1	FP273772; FP255852; FP252036; FP271894;
CL2821Contig1	FP302172; FP254252; FP299937; FP291035;
CL2824Contig1	FP271815; FP266621; FP274779; FP268607;
CL2827Contig1	FP260969; FP275625; FP269730; FP270806;
CL2830Contig1	FP268929; FP263290; FP270793; FP287835;
CL2833Contig1	FP270238; FP255814; FP260569; FP270379;
CL2836Contig1	FP285282; FP264297; FP280646; FP249612;
CL2838Contig1	FP264600; FP293917;
CL2838Contig2	FP278513; FP292531;
CL283Contig1	FP279714; FP279195; FP295114; FP286034; FP274009; FP286183; FP293861; FP251395; FP255443; FP288225; FP292954; FP290693; FP255933; FP260559; FP286033; FP306356; FP293860; FP300226; FP301411; FP300718; FP299211; FP288224; FP311513; FP286182; FP279194; FP279713;
CL2841Contig1	FP268388; FP284679; FP247408; FP302791;
CL2844Contig1	FP271704; FP274808; FP277089; FP290937;
CL2847Contig1	FP281156; FP266806; FP270786; FP280897;
CL2850Contig1	FP264057; FP287758; FP283875; FP303281;
CL2853Contig1	FP286928; FP279874; FP255692; FP296064;
CL2856Contig1	FP249377; FP287912; FP287995; FP267668;
CL2859Contig1	FP267017; FP261703; FP271211; FP278579;
CL2862Contig1	FP282642; FP291136; FP284727; FP282641;
CL2865Contig1	FP273784; FP252268; FP252267; FP273783;
CL2868Contig1	FP270133; FP264062; FP269036; FP262781;
CL286Contig1	FP278016; FP277941; FP283760; FP275171; FP255865; FP250267; FP257810; FP285442; FP275450; FP289602; FP248794; FP287010; FP286879; FP293043; FP291283; FP255301; FP299400; FP303642; FP287009; FP291282; FP285441; FP248793; FP286878; FP289601; FP278015; FP293042;
CL2871Contig1	FP261161; FP245776; FP265842; FP273315;
CL2874Contig1	FP311368; FP311022; FP277577; FP292706;
CL2877Contig1	FP277892; FP286652; FP252075; FP285443;
CL2879Contig1	FP269837; FP248675; FP248674; FP308672;
CL2882Contig1	FP266364; FP264730; FP270157; FP277708;
CL2886Contig1	FP307435; FP311908; FP307434; FP311907;
CL2888Contig1	FP266940; FP246655; FP246261; FP280640;
CL2891Contig1	FP245924; FP264901; FP246096; FP294669;
CL2894Contig1	FP278086; FP266958; FP263602; FP278085;
CL2898Contig1	FP247423; FP270936; FP245722; FP264076;
CL289Contig1	FP283829; FP286272; FP289081; FP294606; FP251320; FP294710; FP295614; FP306595; FP305340; FP305275; FP302760; FP309776; FP308581; FP300296; FP310088; FP289354; FP306977; FP305783; FP307921; FP304874; FP308552; FP307109; FP283828; FP289353; FP289080; FP310596;
CL2901Contig1	FP271787; FP246299; FP299487; FP301526;
CL2903Contig1	FP293646; FP255190; FP287961; FP250970;
CL2906Contig1	FP259812; FP259346; FP259780; FP259601;
CL2909Contig1	FP262321; FP268466; FP270007; FP288551;
CL2912Contig1	FP274863; FP286533; FP283944; FP296692;
CL2915Contig1	FP306724; FP303024; FP310525; FP310879;
CL2918Contig1	FP298036; FP245954; FP268559; FP267031;
CL291Contig1	FP290777; FP248085; FP290312; FP252247; FP248869; FP291870; FP283387; FP250085; FP282125; FP283183; FP273194; FP254503; FP251946;
CL291Contig2	FP252234; FP309830; FP309380; FP311467; FP310200;
CL291Contig3	FP285351; FP283682; FP283683;
CL291Contig4	FP285334; FP307124;
CL2921Contig1	FP306216; FP300400; FP285665; FP293364;
CL2924Contig1	FP271600; FP261099; FP262008; FP273612;
CL2926Contig1	FP264332; FP246255; FP255397; FP290880;
CL2929Contig1	FP266998; FP263529; FP288975; FP270789;
CL2932Contig1	FP291421; FP272937; FP295240; FP297770;
CL2936Contig1	FP274646; FP303290; FP303526; FP303033;
CL2937Contig1	FP288586; FP246667; FP267244; FP294375;
CL293Contig1	FP286870; FP295342; FP252674; FP279703; FP251369; FP250815; FP279700; FP248925; FP277345; FP275014; FP292719; FP285487; FP295275; FP287207; FP293505; FP279618; FP257587; FP309700; FP308221; FP304138; FP279702; FP308430; FP306435; FP295274;
CL2940Contig1	FP270965; FP268853; FP270076; FP284808;
CL2943Contig1	FP255713; FP255569; FP293283; FP266571;
CL2947Contig1	FP272815; FP267610; FP284810; FP271406;
CL2949Contig1	FP263020; FP263021; FP271028; FP264758;
CL2952Contig1	FP268196; FP271059; FP288992; FP269689;
CL2955Contig1	FP276519; FP268442; FP246620; FP258360;
CL2958Contig1	FP311787; FP277022; FP259034; FP311754;
CL2961Contig1	FP267694; FP270431;
CL2961Contig2	FP272200; FP277008;
CL2964Contig1	FP282858; FP289948; FP312347; FP296833;
CL2967Contig1	FP280202; FP292922; FP269751; FP294963;
CL296Contig1	FP281822; FP295562; FP253807; FP254763; FP286115; FP255066; FP255073; FP256936; FP256371; FP254225; FP296629; FP312229; FP311976; FP256795; FP293233; FP283346; FP276613; FP254224; FP312228; FP311975; FP302947; FP304810; FP302468; FP293232;
CL2970Contig1	FP270976; FP246270; FP246399; FP295817;
CL2973Contig1	FP267930; FP279475; FP257290; FP275167;
CL2976Contig1	FP303612; FP248608; FP268237; FP276813;
CL2979Contig1	FP290377; FP245762; FP257707; FP268253;
CL2982Contig1	FP256764; FP297033; FP291805; FP265571;
CL2985Contig1	FP268151; FP265550; FP265482; FP265999;
CL2988Contig1	FP289807; FP269336; FP305969; FP306130;
CL2990Contig1	FP246673; FP296548; FP253557; FP280837;
CL2994Contig1	FP247410; FP263219; FP266525; FP261727;
CL2997Contig1	FP262260; FP264135; FP270931; FP268888;
CL299Contig1	FP254886; FP283488; FP278766; FP281452; FP257720; FP286402; FP294996; FP279274; FP254888; FP257237; FP304659; FP259251; FP309215; FP309650; FP300493; FP300206; FP309135; FP305970; FP310431; FP279273; FP294995; FP274673; FP259055; FP274672; FP307854;
CL29Contig1	FP257482; FP295789; FP256378; FP252014; FP254548; FP250063; FP250080; FP291923; FP278327; FP289751;
CL29Contig2	FP274671; FP248118; FP277760; FP256134; FP287550; FP250370; FP285471; FP288690; FP278806; FP257678; FP249653; FP272934; FP251082; FP297222; FP290438; FP254978; FP249373; FP251807; FP247637; FP281619; FP288580; FP289618; FP253398; FP283562; FP254762; FP250428; FP249035; FP290559; FP257554; FP296258; FP291588; FP286102;
CL29Contig3	FP279318; FP279568; FP283956; FP296365; FP291369; FP255406; FP295784; FP255550; FP286121; FP254097; FP291784; FP289330; FP278799; FP251330; FP297216; FP296512; FP281869; FP278948; FP257809; FP281341; FP287078; FP275846; FP286811; FP293206; FP255088; FP251815; FP288408; FP286789; FP250028; FP294078; FP289329; FP283053; FP310388; FP283955; FP286810; FP296511; FP283052; FP258018; FP297215; FP278947;…
CL29Contig4	FP293714; FP291958; FP285051; FP277739; FP247636; FP287549; FP278076; FP312499; FP280377; FP278326; FP272933; FP286026; FP278805; FP293715; FP253479; FP293468; FP289750; FP286027; FP258120; FP310503; FP290754; FP285470; FP293612; FP289617; FP301007; FP295124; FP277740; FP292139; FP251575; FP293061; FP256271; FP250850; FP293469; FP255428; FP285183; FP310190; FP299298; FP278077; FP256696; FP290755;…
CL2Contig1	FP311326; FP252263; FP293176; FP264169; FP312378; FP291669; FP288728; FP289226; FP280142;
CL2Contig2	FP268953; FP295470; FP246058; FP302143;
CL2Contig3	FP310839; FP299418; FP303868; FP309861; FP298542; FP306673; FP301077; FP298933; FP299802; FP310159; FP307958; FP307718; FP310389; FP303723; FP312266; FP298992; FP311676; FP303442; FP312202; FP301790; FP299104; FP310680; FP301334; FP311154; FP306605; FP302988; FP303754; FP311107; FP310216; FP299048; FP301776; FP312319; FP311752; FP311955; FP306542; FP300531; FP306353; FP293568; FP308519; FP308969;…
CL2Contig4	FP304457; FP301630; FP301419; FP311502; FP310186; FP305494; FP301960; FP297844; FP301979; FP310951; FP312300; FP299918; FP311559; FP308149; FP299482; FP307656; FP303203; FP300097; FP303644; FP307005; FP299600; FP309435; FP310461; FP310245; FP310559; FP302041; FP300995; FP299996; FP300970; FP304692; FP258071; FP309570; FP306646; FP310393; FP311725; FP310540; FP310424; FP308418; FP310236; FP310558;…
CL3000Contig1	FP251538; FP293113; FP263235; FP276981;
CL3003Contig1	FP257092; FP263519; FP276973; FP261896;
CL3006Contig1	FP278215; FP288288; FP287375; FP282082;
CL3009Contig1	FP285348; FP267203; FP310077; FP287921;
CL3012Contig1	FP249603; FP250486; FP274990; FP287489;
CL3015Contig1	FP263837; FP272460; FP284592; FP286939;
CL3018Contig1	FP295414; FP247715; FP247714; FP295413;
CL301Contig1	FP295793; FP295747; FP279089; FP249792; FP248205; FP255504; FP286354; FP248375; FP254758; FP253671; FP248779; FP293486; FP281588; FP298049; FP269696; FP256305; FP263379; FP296869; FP264010; FP279088; FP282045; FP281587; FP282044; FP248778; FP298048;
CL3021Contig1	FP290899; FP289016; FP310053; FP281423;
CL3024Contig1	FP280118; FP261422; FP301809; FP287825;
CL3027Contig1	FP271680; FP273595; FP246343; FP273594;
CL3029Contig1	FP247571; FP295369; FP298312; FP281682;
CL3031Contig1	FP276210; FP289561; FP273617; FP277517;
CL3034Contig1	FP256956; FP257305; FP254076; FP276600;
CL3039Contig1	FP263396; FP264127; FP293785; FP268860;
CL3042Contig1	FP283877; FP269758; FP265497; FP276862;
CL3044Contig1	FP276065; FP247236; FP290827; FP276064;
CL3048Contig1	FP248968; FP269752; FP267646;
CL3051Contig1	FP262614; FP262615; FP266199; FP269693;
CL3054Contig1	FP248494; FP281964; FP257743; FP255897;
CL3058Contig1	FP303276; FP279147; FP255373; FP304300;
CL305Contig1	FP293996; FP274180; FP266498; FP297888; FP286894; FP257762; FP251529; FP253802; FP280771; FP256675; FP250193; FP274924; FP287321; FP294001; FP272871; FP266797; FP274116; FP274117; FP260744; FP300358; FP271164; FP304970; FP294000; FP297061; FP303800;
CL3060Contig1	FP253540; FP251384; FP273614; FP266245;
CL3063Contig1	FP254142; FP299236; FP306753; FP255326;
CL3066Contig1	FP247148; FP270799; FP249439; FP269554;
CL3069Contig1	FP290138; FP260477; FP272257; FP290137;
CL3072Contig1	FP283417; FP308441; FP256961; FP275149;
CL3075Contig1	FP264245; FP252789; FP268179; FP297854;
CL3079Contig1	FP284371; FP285988; FP249942; FP287015;
CL3082Contig1	FP277564; FP250768; FP297306; FP285091;
CL3084Contig1	FP271821; FP293984; FP253355; FP276614;
CL3088Contig1	FP247880; FP288290; FP281466; FP294434;
CL308Contig1	FP312001; FP283859; FP279439; FP250682; FP306427; FP278368; FP294717; FP278701; FP292077; FP278369; FP278057; FP269288;
CL308Contig2	FP283860; FP285303; FP279440; FP294718; FP280027; FP283961; FP253517; FP254785; FP292078; FP278702; FP292332; FP281571;
CL3091Contig1	FP272508; FP271345; FP268362; FP269771;
CL3094Contig1	FP266872; FP301839; FP306289; FP272758;
CL3097Contig1	FP299152; FP298920; FP255616; FP310578;
CL3099Contig1	FP255130; FP256612; FP268063; FP249647;
CL3103Contig1	FP245630; FP262360; FP251129; FP275568;
CL3106Contig1	FP271504; FP291114; FP276950; FP270458;
CL3109Contig1	FP255867; FP289073; FP253616; FP251439;
CL3112Contig1	FP257711; FP309724; FP304605; FP297846;
CL3115Contig1	FP260348; FP268418; FP254759; FP266222;
CL3118Contig1	FP250749; FP291164; FP265333;
CL311Contig1	FP254361; FP252580; FP273797; FP300913; FP278731; FP303954; FP308250; FP309219; FP301448; FP310868; FP300339; FP311023; FP257134; FP270855; FP269542; FP268190; FP245730; FP260588; FP309011; FP252581; FP260594; FP309245; FP273798; FP270170;
CL3121Contig1	FP279350; FP264676; FP272848; FP284633;
CL3123Contig1	FP267852; FP252700; FP308061; FP258917;
CL3126Contig1	FP284443; FP276665; FP283876; FP284016;
CL3129Contig1	FP271219; FP288068; FP265427; FP288763;
CL3131Contig1	FP311182; FP261643; FP306842; FP271428;
CL3134Contig1	FP263391; FP260767; FP268825; FP270180;
CL3137Contig1	FP268675; FP247059; FP297279; FP258498;
CL3140Contig1	FP266580; FP280856; FP291446; FP300387;
CL3143Contig1	FP278126; FP260761; FP275399; FP291493;
CL3146Contig1	FP283354; FP265383; FP247952; FP266945;
CL3149Contig1	FP250158; FP293501; FP271853; FP290861;
CL3152Contig1	FP269533; FP256418; FP261211; FP285847;
CL3155Contig1	FP267752; FP269149; FP264163; FP266516;
CL3158Contig1	FP250338; FP277868; FP271289; FP266136;
CL315Contig1	FP273635; FP278325; FP282550; FP278429; FP292963; FP254141; FP254900; FP287626; FP250311; FP251579; FP248504; FP248912; FP281515; FP256039; FP255738; FP274934; FP311770; FP310089; FP311308; FP287443; FP282425; FP268798; FP312555; FP273012;
CL3161Contig1	FP265360; FP263957; FP266857; FP284591;
CL3164Contig1	FP291581; FP293332; FP295384;
CL3167Contig1	FP281484; FP250606; FP284156; FP294822;
CL3170Contig1	FP262018; FP262544; FP272033; FP266316;
CL3174Contig1	FP269491; FP253925; FP270899; FP265913;
CL3177Contig1	FP267555; FP268147; FP255236; FP268846;
CL3180Contig1	FP260463; FP271739; FP268254; FP302778;
CL3183Contig1	FP282903; FP280594; FP301582; FP301561;
CL3186Contig1	FP289604; FP270745; FP287772;
CL3189Contig1	FP249060; FP290289; FP287440; FP290282;
CL318Contig1	FP257183; FP284312; FP291883; FP250018; FP296333; FP287102; FP291318; FP281681; FP289358; FP297943; FP253502; FP257413; FP256248; FP290412; FP290123; FP250142; FP285642; FP288901; FP282600; FP297190; FP279900; FP283416; FP255044; FP248759;
CL3192Contig1	FP254661; FP284552; FP260326; FP252820;
CL3195Contig1	FP271185; FP272259; FP267577; FP290877;
CL3198Contig1	FP266601; FP268651; FP247098; FP302578;
CL3201Contig1	FP269882; FP251271; FP256227; FP279292;
CL3204Contig1	FP262881; FP263696; FP276270; FP262880;
CL3207Contig1	FP263961; FP262377; FP270390; FP265623;
CL3210Contig1	FP263550; FP261008; FP262283; FP306449;
CL3213Contig1	FP268582; FP263580; FP282406; FP282407;
CL3216Contig1	FP301061; FP302325; FP308980; FP304649;
CL3219Contig1	FP270957; FP268212; FP280726; FP286001;
CL321Contig1	FP286152; FP276190; FP286650; FP250837; FP294861; FP291395; FP255185; FP250699; FP250149; FP247652; FP254025; FP297694; FP256529; FP288354; FP249762; FP253869; FP275693; FP255898; FP308114; FP291394; FP298996; FP307814; FP282730; FP282729;
CL3222Contig1	FP270992; FP265596; FP271388; FP268755;
CL3225Contig1	FP274171; FP245833; FP245877; FP267240;
CL3228Contig1	FP270357; FP261146; FP266274; FP274224;
CL3231Contig1	FP287310; FP307170; FP290428; FP290984;
CL3234Contig1	FP279062; FP250315; FP296402; FP293226;
CL3237Contig1	FP265011; FP252786; FP260503; FP299219;
CL3240Contig1	FP282278; FP282277; FP258152; FP312199;
CL3243Contig1	FP285147; FP272913; FP290791; FP289736;
CL3246Contig1	FP254813; FP288243; FP254756; FP264067;
CL3249Contig1	FP280786; FP272492; FP299947; FP258875;
CL324Contig1	FP291698; FP297024; FP255379; FP255741; FP255695; FP254477; FP255821; FP294248; FP294292; FP276141; FP276216; FP257157; FP303312; FP291697; FP299562; FP299045; FP308089; FP299412; FP259002; FP309221; FP305362; FP254476; FP307775;
CL3252Contig1	FP309456; FP267188; FP262464; FP309361;
CL3256Contig1	FP253848; FP291980; FP249615; FP295489;
CL3259Contig1	FP279709; FP260409; FP260198; FP288223;
CL3262Contig1	FP270979; FP249511; FP267552; FP310070;
CL3265Contig1	FP263942; FP309286; FP305529; FP293399;
CL3266Contig1	FP278495; FP292822; FP253267; FP276728;
CL3270Contig1	FP255652; FP270697; FP311186; FP277587;
CL3273Contig1	FP269095; FP276602; FP267606; FP291643;
CL3276Contig1	FP256883; FP303146; FP306266; FP299551;
CL327Contig1	FP252477; FP266322;
CL327Contig2	FP262253; FP292257; FP267758; FP251069; FP264138; FP289990; FP302004; FP301394; FP304281; FP262449; FP262396; FP276952; FP267149; FP307050; FP255994; FP289989; FP307232; FP305628; FP309216; FP309064; FP305755;
CL3280Contig1	FP266013; FP284586; FP262306; FP280650;
CL3283Contig1	FP271170; FP275791; FP266000; FP284690;
CL3286Contig1	FP276960; FP264034; FP284584; FP285143;
CL3289Contig1	FP261800; FP246309; FP269942; FP264881;
CL3292Contig1	FP246818; FP252284; FP270489; FP246784;
CL3295Contig1	FP266547; FP263564; FP283897; FP270405;
CL3298Contig1	FP310853; FP311095; FP311694; FP311096;
CL3300Contig1	FP272697; FP294694; FP250439; FP270707;
CL3303Contig1	FP269456; FP271235; FP272092; FP280969;
CL3306Contig1	FP284071; FP312220; FP311151; FP274482;
CL3309Contig1	FP310475; FP263323; FP261177; FP261194;
CL330Contig1	FP284440; FP250485; FP296499; FP273709; FP251829; FP257766; FP287281; FP294939; FP291259; FP280185; FP287426; FP260887; FP270766; FP312143; FP273708; FP291666; FP287280; FP287425; FP256861; FP280184; FP284439; FP296498; FP258250;
CL3312Contig1	FP305622; FP289640; FP306810; FP273582;
CL3315Contig1	FP250442; FP272380; FP249546; FP260287;
CL3317Contig1	FP270254; FP262188; FP265024; FP299651;
CL3320Contig1	FP265218; FP261578; FP289755; FP292865;
CL3322Contig1	FP288197; FP272247; FP287090; FP265239;
CL3326Contig1	FP272960; FP276714; FP266054; FP272959;
CL3328Contig1	FP271874; FP267127; FP245680; FP269465;
CL3331Contig1	FP271143; FP261491; FP264082; FP277033;
CL3336Contig1	FP283746; FP262536; FP259690; FP277124;
CL3339Contig1	FP271751; FP285548; FP294727; FP289190;
CL333Contig1	FP288180; FP280141; FP296995; FP297098; FP250233; FP251062; FP251004; FP253248; FP281499; FP262144; FP252336; FP249748; FP256871; FP265821; FP299161; FP307071; FP248094; FP305167; FP294761; FP294760; FP260679; FP270924; FP312025;
CL3342Contig1	FP262475; FP269037; FP265878; FP294310;
CL3345Contig1	FP270749; FP267307; FP250624; FP246946;
CL3348Contig1	FP249545; FP287662; FP287946; FP287663;
CL3351Contig1	FP280727; FP293097; FP261212; FP287861;
CL3354Contig1	FP263245; FP272334; FP297262; FP281935;
CL3357Contig1	FP291005; FP252061; FP287805;
CL3360Contig1	FP302040; FP268617; FP260836; FP293598;
CL3363Contig1	FP287136; FP276564; FP261428; FP296486;
CL3366Contig1	FP248165; FP257475; FP245788; FP268643;
CL3369Contig1	FP276422; FP268148; FP275797; FP296346;
CL336Contig1	FP307977; FP307900; FP275794; FP280364; FP274465; FP274738; FP273859; FP290571; FP249751; FP287141; FP274526; FP273651; FP300357; FP304492; FP309737; FP304882; FP303649; FP298444; FP311637; FP308227; FP309559; FP307882;
CL3372Contig1	FP288618; FP263304; FP308600; FP272589;
CL3375Contig1	FP306091; FP308902; FP251548; FP277080;
CL3378Contig1	FP298994; FP245863; FP308125; FP266206;
CL3381Contig1	FP295405; FP269026; FP251799; FP264820;
CL3384Contig1	FP287313; FP268705; FP266478; FP310348;
CL3387Contig1	FP268663; FP270475; FP276689; FP306072;
CL338Contig1	FP281742; FP293552; FP289980; FP293759; FP296912; FP293951; FP279477; FP252174; FP297548; FP252032; FP250390; FP252033; FP274922; FP307376; FP301361; FP296911; FP279476; FP274921; FP293551; FP248886; FP303306; FP307375;
CL3390Contig1	FP261117; FP287973; FP273002; FP291057;
CL3393Contig1	FP276827; FP255945; FP276804; FP274017;
CL3396Contig1	FP262632; FP267374; FP262631; FP295217;
CL3399Contig1	FP246238; FP254460; FP310640; FP280317;
CL3402Contig1	FP307992; FP270081; FP266718; FP268724;
CL3405Contig1	FP291868; FP256846; FP267255; FP276552;
CL3408Contig1	FP264086; FP303351; FP268769; FP260322;
CL3411Contig1	FP245697; FP270500; FP265793; FP265056;
CL3414Contig1	FP265825; FP260939; FP270115; FP291188;
CL3417Contig1	FP263895; FP265616; FP285010; FP265546;
CL341Contig1	FP248649; FP247101;
CL341Contig2	FP297065; FP274783; FP261382; FP267725; FP260399; FP260356; FP261596; FP304444; FP300888; FP284617; FP292040; FP271282; FP309634; FP309616; FP297064; FP283841; FP274782; FP292039;
CL341Contig3	FP277370; FP277369;
CL3421Contig1	FP260864; FP267554; FP266681; FP264965;
CL3424Contig1	FP254946; FP279564; FP250194;
CL3427Contig1	FP256413; FP273430; FP294217; FP279797;
CL3429Contig1	FP276615; FP246606; FP284806; FP265838;
CL3433Contig1	FP269324; FP292042; FP277940; FP277091;
CL3436Contig1	FP250818; FP304236; FP263871;
CL3439Contig1	FP275732; FP265506; FP272337; FP303381;
CL3442Contig1	FP266889; FP272543; FP271732; FP297045;
CL3444Contig1	FP271041; FP263409; FP276664; FP294388;
CL3447Contig1	FP263187; FP245633; FP287612; FP267447;
CL344Contig1	FP282900; FP282490; FP288514; FP273246; FP292469; FP296156; FP258341; FP269560; FP252976; FP284094; FP292771; FP273247; FP293017; FP292470; FP274742; FP256690; FP251472; FP257564; FP288515; FP282901; FP291436; FP296157;
CL3451Contig1	FP286675; FP266257; FP285342; FP296317;
CL3453Contig1	FP265086; FP266862; FP265002; FP311345;
CL3456Contig1	FP286270; FP288990; FP257476; FP294405;
CL3459Contig1	FP248073; FP274329; FP287163; FP267568;
CL3462Contig1	FP248462; FP269121; FP247269; FP276836;
CL3466Contig1	FP270009; FP246396; FP270978; FP270218;
CL3468Contig1	FP263449; FP261072; FP271071; FP267107;
CL3471Contig1	FP271785; FP298224; FP301018; FP303583;
CL3474Contig1	FP267921; FP268281; FP262139; FP280704;
CL3478Contig1	FP254568; FP282295; FP287707; FP282767;
CL3480Contig1	FP288395; FP249321; FP296040; FP298198;
CL3483Contig1	FP263581; FP267314; FP292757; FP247197;
CL3486Contig1	FP260363; FP260524; FP287807; FP270331;
CL3489Contig1	FP265610; FP265845; FP247170; FP285189;
CL348Contig1	FP300484; FP302702; FP308122; FP303543; FP306613; FP298750; FP298411; FP309563; FP310960; FP308283; FP311082; FP312479; FP301506; FP258012; FP301129; FP303597; FP302852; FP275957; FP275956; FP310340; FP300474;
CL3493Contig1	FP246618; FP261597; FP261279; FP288062;
CL3496Contig1	FP268343; FP261716; FP255541; FP279843;
CL349Contig1	FP284911; FP249739; FP295242; FP251824; FP252608; FP254380; FP252614; FP281225; FP260302; FP283648; FP246544; FP291851; FP291850; FP290383; FP295241; FP268712; FP254379; FP267537; FP255531; FP258986; FP290382;
CL3500Contig1	FP298090; FP298089; FP292128; FP307052;
CL3503Contig1	FP250802; FP281893; FP287524; FP270303;
CL3506Contig1	FP268676; FP295773; FP303452; FP275339;
CL3508Contig1	FP303500; FP302349; FP259512; FP300318;
CL3510Contig1	FP245601; FP264284; FP262341; FP267870;
CL3513Contig1	FP269642; FP270380; FP271158; FP299202;
CL3516Contig1	FP283314; FP278045; FP253411; FP246487;
CL3519Contig1	FP267716; FP248100; FP265340; FP268030;
CL3522Contig1	FP268355; FP261567; FP262419; FP280829;
CL3525Contig1	FP270834; FP288947; FP288485; FP291906;
CL3528Contig1	FP294938; FP282548; FP267492; FP258368;
CL3531Contig1	FP267327; FP272775; FP292163; FP248092;
CL3534Contig1	FP270952; FP277062; FP266017; FP291191;
CL3537Contig1	FP271350; FP262128; FP262368; FP290949;
CL353Contig1	FP279845; FP283435; FP257760; FP273613; FP289889; FP292924; FP281892; FP270419; FP256531; FP261837; FP292358; FP310097; FP282748; FP282747; FP259389; FP259286; FP281891; FP292357; FP283434; FP279844; FP292923;
CL3540Contig1	FP292236; FP274000; FP275633; FP296261;
CL3543Contig1	FP272729; FP271681; FP305147; FP308731;
CL3546Contig1	FP264850; FP267830; FP260771; FP288231;
CL3550Contig1	FP253530; FP311438; FP258079; FP250685;
CL3553Contig1	FP262691; FP261593; FP262692; FP273820;
CL3556Contig1	FP295515; FP245590; FP271875; FP266234;
CL355Contig1	FP293550; FP265369; FP296107; FP295957; FP307823; FP304672; FP305613; FP258790; FP310694; FP310429; FP280559; FP256787; FP310140; FP301777; FP304253; FP304199; FP299989; FP299449; FP299218; FP310947; FP298362;
CL3560Contig1	FP264520; FP296089; FP293065;
CL3562Contig1	FP246275; FP290094; FP271342;
CL3564Contig1	FP262959; FP268367; FP267306;
CL3569Contig1	FP256268; FP246488; FP295056;
CL3571Contig1	FP246014; FP265469; FP262361;
CL3574Contig1	FP268048; FP271175; FP267308;
CL3578Contig1	FP276667; FP262211; FP270827;
CL3581Contig1	FP274476; FP268193; FP274475;
CL3583Contig1	FP260321; FP280145; FP296819;
CL3586Contig1	FP245603; FP245584; FP260471;
CL3589Contig1	FP247090; FP260346; FP270446;
CL3592Contig1	FP253588; FP290790; FP252941;
CL3594Contig1	FP270178; FP290638; FP291130;
CL3597Contig1	FP265828; FP279641; FP300868;
CL359Contig1	FP277725; FP300222; FP297032; FP261030; FP296775; FP246031; FP297031; FP298758; FP298341; FP296774; FP298623; FP284792; FP264126; FP304738; FP304276; FP303116; FP306538; FP303202; FP303087; FP299363; FP312580;
CL3600Contig1	FP248507; FP270654; FP247230;
CL3603Contig1	FP249215; FP309962; FP247048;
CL3607Contig1	FP266079; FP255324; FP270247;
CL3609Contig1	FP258603; FP291738; FP290501;
CL3612Contig1	FP264953; FP261293; FP268997;
CL3615Contig1	FP282508; FP246960; FP282507;
CL3618Contig1	FP265475; FP276633; FP276454;
CL3621Contig1	FP265490; FP247108; FP311256;
CL3624Contig1	FP249741; FP246327; FP270316;
CL3627Contig1	FP252494; FP245747; FP261797;
CL362Contig1	FP279706; FP283424; FP289446; FP296093; FP295827; FP276294; FP275959; FP253075; FP253927; FP251675; FP255060; FP297761; FP264735; FP261133; FP276293; FP273848; FP275958; FP289445; FP296092; FP302768;
CL3630Contig1	FP260780; FP296244; FP287986;
CL3633Contig1	FP255769; FP297856; FP280853;
CL3637Contig1	FP264761; FP269497; FP276767;
CL3640Contig1	FP257871; FP287918; FP267033;
CL3642Contig1	FP311629; FP261515; FP311651;
CL3646Contig1	FP301302; FP301294; FP300514;
CL3648Contig1	FP283800; FP252652; FP291111;
CL3651Contig1	FP277467; FP270279; FP258943;
CL3655Contig1	FP289297; FP273556; FP291356;
CL3657Contig1	FP290073; FP290074; FP273404;
CL365Contig1	FP248484; FP261796; FP286284; FP246562; FP280158; FP295775; FP246591; FP297729; FP268575; FP248986; FP280159; FP252866; FP263872; FP248430; FP264196; FP264195; FP292980; FP249360; FP297730; FP295776; FP291197;
CL3662Contig1	FP261477; FP295589; FP276321;
CL3665Contig1	FP300817; FP311844; FP304384;
CL3666Contig1	FP248260; FP275510; FP293059;
CL3669Contig1	FP289919; FP299850; FP307490;
CL3672Contig1	FP266217; FP246146; FP280362;
CL3675Contig1	FP265376; FP253960; FP260698;
CL3678Contig1	FP253663; FP248941; FP249171;
CL3681Contig1	FP268180; FP267184; FP266746;
CL3684Contig1	FP248580; FP284820; FP268501;
CL3688Contig1	FP311206; FP259104; FP260010;
CL368Contig1	FP286464; FP248468; FP288183; FP310042; FP310232; FP299421; FP248469; FP253661; FP290315; FP250126; FP257324; FP253654; FP285830; FP255502; FP253507; FP291745; FP288184; FP294484; FP286465; FP295330;
CL3691Contig1	FP269171; FP275078; FP277764;
CL3693Contig1	FP265040; FP261138; FP264501;
CL3696Contig1	FP260361; FP270117; FP277016;
CL3699Contig1	FP273176; FP265865; FP274814;
CL3702Contig1	FP275881; FP268895; FP297954;
CL3705Contig1	FP286379; FP260392; FP281275;
CL3708Contig1	FP306688; FP304998; FP306099;
CL3711Contig1	FP250919; FP265462; FP275755;
CL3714Contig1	FP272713; FP288179; FP287225;
CL3717Contig1	FP283336; FP279556; FP305192;
CL371Contig1	FP278107; FP282663; FP282352; FP253788; FP259140; FP257580; FP259086; FP259349; FP248741; FP282351; FP259609; FP260069; FP248740; FP259288; FP259006; FP260015; FP259607; FP278106; FP259831; FP260085;
CL3720Contig1	FP270650; FP272080; FP275462;
CL3723Contig1	FP265397; FP266596; FP264698;
CL3727Contig1	FP295852; FP275544; FP282400;
CL3729Contig1	FP245751; FP250662; FP289854;
CL3732Contig1	FP268129; FP267976; FP272038;
CL3736Contig1	FP246407; FP292411; FP292410;
CL3740Contig1	FP295425; FP290181; FP296168;
CL3743Contig1	FP272983; FP246964; FP286331;
CL3746Contig1	FP294944; FP260617; FP310862;
CL3748Contig1	FP247221; FP267995; FP270874;
CL3752Contig1	FP275427; FP297328; FP295895;
CL3755Contig1	FP266792; FP276757; FP274217;
CL3758Contig1	FP248192; FP292169; FP302861;
CL375Contig1	FP259154; FP300754; FP300752; FP308439; FP304538; FP307257; FP301437; FP308671; FP305038; FP283674; FP285496; FP252483; FP277667; FP298859; FP295103; FP282430; FP285883; FP311930; FP298696; FP311931;
CL3761Contig1	FP297559; FP297558; FP258581;
CL3764Contig1	FP290336; FP306622; FP254069;
CL3767Contig1	FP249260; FP274885; FP288818;
CL3770Contig1	FP265888; FP274645;
CL3772Contig1	FP264227; FP267265; FP272865;
CL3775Contig1	FP276947; FP294330; FP285362;
CL3779Contig1	FP246351; FP254672; FP292038;
CL377Contig1	FP256211; FP283341; FP249049; FP280309; FP253167; FP286120; FP256368; FP254793; FP284879; FP284917; FP273342; FP293656; FP291651; FP293493; FP288351; FP277187; FP293094; FP286011; FP297885; FP255742;
CL3780Contig1	FP259347; FP258945; FP311606;
CL3783Contig1	FP271228; FP283092; FP273575;
CL3786Contig1	FP267279; FP271968; FP276917;
CL3789Contig1	FP286032; FP276608; FP286031;
CL3792Contig1	FP252021; FP247993; FP290159;
CL3796Contig1	FP269644; FP306102; FP301185;
CL3799Contig1	FP283571; FP290715; FP294457;
CL37Contig1	FP277851; FP283710; FP273131; FP292324; FP251731; FP254536; FP252839; FP254628; FP249601; FP275773; FP279982; FP251147; FP288241; FP297648; FP257411; FP255804; FP310351; FP284336; FP305206; FP257154; FP304351; FP292310; FP306195; FP306453; FP298574; FP308507; FP304515; FP300204; FP304202; FP306833; FP308787; FP305277; FP312305; FP304079; FP302103; FP299859; FP308650; FP308405; FP309816; FP306571;…
CL3802Contig1	FP302181; FP310041; FP308707;
CL3805Contig1	FP261635; FP288884; FP288883;
CL3807Contig1	FP295169; FP259053; FP258922;
CL3810Contig1	FP249298; FP248483; FP286283;
CL3813Contig1	FP284418; FP254784; FP293128;
CL3816Contig1	FP288804; FP283209; FP294413;
CL3819Contig1	FP247526; FP261909; FP302356;
CL381Contig1	FP249389; FP276110; FP277340; FP282381; FP248999; FP286476; FP276239; FP260833; FP249390; FP249000; FP251398; FP296689; FP251095; FP276240; FP276111; FP282382; FP257568; FP253620; FP288508; FP286477;
CL3822Contig1	FP291304; FP252592; FP297010;
CL3826Contig1	FP268319; FP288251; FP265949;
CL3829Contig1	FP253372; FP269445; FP260916;
CL3832Contig1	FP271183; FP259579; FP304386;
CL3835Contig1	FP311600; FP284999; FP296072;
CL3838Contig1	FP283896; FP285080; FP271492;
CL3840Contig1	FP246167; FP253762; FP267092;
CL3844Contig1	FP262864; FP278801; FP282032;
CL3846Contig1	FP262209; FP269486; FP286420;
CL3849Contig1	FP266853; FP246830; FP296815;
CL3852Contig1	FP277507; FP276658; FP277506;
CL3855Contig1	FP290926; FP268133; FP312188;
CL3859Contig1	FP250327; FP294386; FP270418;
CL385Contig1	FP280913; FP278341; FP288830; FP278502; FP257463; FP289870; FP304070; FP301139; FP303635; FP282841; FP263441; FP251110; FP256167; FP251568; FP278342; FP280914; FP253476; FP288831; FP282753; FP278503;
CL3862Contig1	FP284411; FP298329; FP301758;
CL3865Contig1	FP300536; FP299805; FP277735;
CL3867Contig1	FP251532; FP252655; FP281493;
CL3870Contig1	FP284276; FP284921; FP289802;
CL3873Contig1	FP286076; FP294297; FP300980;
CL3877Contig1	FP269386; FP264367; FP294161;
CL387Contig1	FP293338; FP260603; FP251197; FP272352; FP264576; FP268096; FP246274; FP305512; FP272739; FP246792; FP271232; FP269200; FP297534; FP246215; FP304626; FP309269; FP304298; FP306241; FP297533; FP309113;
CL3880Contig1	FP249265; FP265552; FP263402;
CL3883Contig1	FP249440; FP282054; FP287538;
CL3886Contig1	FP270046; FP292467; FP310577;
CL3889Contig1	FP273006; FP259640; FP288108;
CL3892Contig1	FP249093; FP260235; FP267354;
CL3896Contig1	FP273598; FP257635; FP293705;
CL3899Contig1	FP280292; FP289067; FP293666;
CL3902Contig1	FP269412; FP296389; FP296206;
CL3905Contig1	FP265457; FP311042; FP310803;
CL3908Contig1	FP270312; FP261268; FP277209;
CL390Contig1	FP248257; FP284257; FP270249; FP253418; FP251443; FP296413; FP263910; FP305544; FP280525; FP304051; FP300088; FP296412; FP300309; FP299634; FP306589; FP305976;
CL390Contig2	FP270751; FP302866; FP307025;
CL3911Contig1	FP261215; FP271107; FP310570;
CL3914Contig1	FP248376; FP262740; FP271857;
CL3917Contig1	FP261109; FP309327; FP305862;
CL3920Contig1	FP266350; FP261391; FP268899;
CL3923Contig1	FP260602; FP265228; FP265332;
CL3926Contig1	FP264663; FP289710; FP295733;
CL3929Contig1	FP294588; FP255371; FP264592;
CL3932Contig1	FP277195; FP282909;
CL3934Contig1	FP268963; FP261536; FP287802;
CL3938Contig1	FP269831; FP277288; FP298165;
CL393Contig1	FP259322; FP277563; FP259499; FP259596; FP259965; FP281300; FP263579; FP275896; FP258381; FP259196; FP281301; FP252190; FP258851; FP300314; FP301296; FP271599; FP247762; FP251634; FP290596;
CL3940Contig1	FP272650; FP272693; FP273534;
CL3944Contig1	FP267442; FP245943; FP281482;
CL3946Contig1	FP261462; FP246128;
CL3949Contig1	FP300645; FP302081; FP310931;
CL3952Contig1	FP297077; FP297076; FP308111;
CL3955Contig1	FP284551; FP259803; FP285517;
CL3958Contig1	FP284993; FP245547; FP262494;
CL3961Contig1	FP310867; FP267857; FP308238;
CL3964Contig1	FP260280; FP297268; FP297269;
CL3967Contig1	FP246185; FP269803; FP267504;
CL3970Contig1	FP270808; FP286339; FP289170;
CL3973Contig1	FP254724; FP269484; FP270372;
CL3976Contig1	FP254538; FP248173; FP278440;
CL3979Contig1	FP252380; FP283108; FP295887;
CL397Contig1	FP281364; FP277654; FP281363; FP277295; FP284305; FP297120; FP279919; FP300559; FP279920; FP271641; FP304563; FP268181; FP293425; FP250164; FP254729; FP279651; FP277460; FP285527; FP297121;
CL3982Contig1	FP246889; FP267747; FP296091;
CL3985Contig1	FP261410; FP247192; FP283212;
CL3988Contig1	FP262249; FP268479; FP272513;
CL3991Contig1	FP296812; FP271923; FP296811;
CL3994Contig1	FP277508; FP278037; FP289452;
CL3997Contig1	FP282713; FP289323; FP296721;
CL399Contig1	FP274349; FP258548; FP259046; FP259005; FP258624; FP262353; FP259262; FP247482; FP259183; FP260017; FP258539; FP258272; FP258321; FP259319; FP259202; FP258470; FP259500; FP259099; FP258732;
CL4001Contig1	FP246647; FP264129; FP260504;
CL4005Contig1	FP279063; FP252208; FP288599;
CL4007Contig1	FP289099; FP275161; FP286072;
CL4011Contig1	FP277935; FP300532; FP300424;
CL4013Contig1	FP269828; FP291063; FP287216;
CL4016Contig1	FP286756; FP251171; FP248797;
CL4018Contig1	FP269128; FP245868; FP310847;
CL4021Contig1	FP257887; FP301488; FP299115;
CL4024Contig1	FP288538; FP292079; FP265373;
CL4027Contig1	FP249598; FP271943; FP277211;
CL402Contig1	FP283361; FP272384; FP292643; FP254399; FP272398; FP278160; FP273528; FP292151; FP250358; FP304213; FP294881; FP304751; FP296079; FP278159; FP308274; FP254398; FP296078; FP304359; FP283360;
CL4030Contig1	FP257724; FP300842; FP300548;
CL4033Contig1	FP296708; FP264739; FP259127;
CL4036Contig1	FP266072; FP259000; FP290876;
CL4039Contig1	FP251715; FP257007; FP273048;
CL4042Contig1	FP257208; FP246840; FP272439;
CL4045Contig1	FP288430; FP264839; FP287750;
CL4048Contig1	FP283871; FP311595; FP304365;
CL4051Contig1	FP267755; FP311248; FP309963;
CL4054Contig1	FP250996; FP260971; FP247368;
CL405Contig1	FP278566; FP284063; FP260798; FP268743; FP256596; FP255731; FP297772; FP278581; FP275129; FP275128; FP285113; FP310147; FP278181; FP285112; FP278580; FP298296; FP308642; FP295808; FP300707;
CL4060Contig1	FP246268; FP270348; FP292198;
CL4063Contig1	FP295394; FP287012; FP257151;
CL4066Contig1	FP267881; FP255557; FP270940;
CL4069Contig1	FP252125; FP289844; FP264712;
CL4072Contig1	FP290624; FP303349; FP258770;
CL4075Contig1	FP245689; FP261053; FP264648;
CL4078Contig1	FP260535; FP294715; FP269206;
CL4081Contig1	FP264216; FP246196; FP281303;
CL4084Contig1	FP246677; FP260853; FP260903;
CL4088Contig1	FP288896; FP281124; FP296121;
CL408Contig1	FP251474; FP291650; FP281138; FP289407; FP272306; FP304746; FP254586; FP264924; FP307390; FP307246; FP301883;
CL408Contig2	FP246613; FP307150; FP307245; FP285581; FP299338; FP289406;
CL4091Contig1	FP277073; FP311700; FP258384;
CL4094Contig1	FP261440; FP288509; FP276445;
CL4097Contig1	FP269902; FP292749; FP285271;
CL40Contig1	FP253320; FP278431; FP274155; FP246287;
CL40Contig2	FP251020; FP274603; FP293868; FP247982; FP292951; FP295937; FP286134; FP289864; FP251826; FP249116; FP284876; FP292940; FP294836; FP257829; FP279061; FP293698; FP281017; FP250335; FP290385; FP253813; FP297318; FP277921; FP290177; FP291961; FP284177; FP291309; FP248668; FP286353; FP296164; FP251338; FP294491; FP254999; FP294882; FP293187; FP285394; FP280434; FP255298; FP275771; FP293095; FP281973;…
CL4100Contig1	FP287536; FP285733; FP287535;
CL4102Contig1	FP266939; FP283819; FP249628;
CL4105Contig1	FP267919; FP278618; FP268925;
CL4108Contig1	FP278297; FP259212; FP300121;
CL4111Contig1	FP260292; FP288790; FP288789;
CL4114Contig1	FP279065; FP276043; FP276340;
CL4117Contig1	FP264562; FP260901; FP266442;
CL411Contig1	FP294885; FP273258; FP285013; FP295770; FP256862; FP284049; FP256571; FP276666; FP293885; FP269885; FP304081; FP293897; FP304729; FP251308; FP255360; FP273257; FP295769; FP285012;
CL4120Contig1	FP249960; FP275571; FP269176;
CL4124Contig1	FP275779; FP295540; FP278354;
CL4127Contig1	FP266108; FP264329; FP291107;
CL4130Contig1	FP268458; FP282462; FP283241;
CL4133Contig1	FP248262; FP263380; FP284289;
CL4136Contig1	FP267181; FP272068; FP269869;
CL4139Contig1	FP261819; FP267979; FP268447;
CL4142Contig1	FP254050; FP254051; FP270339;
CL4146Contig1	FP264224; FP265057; FP263146;
CL4149Contig1	FP245782; FP284493; FP292295;
CL414Contig1	FP305325; FP264239; FP304038; FP305077; FP304698; FP300761; FP305699; FP305586; FP253522; FP260024; FP302175; FP303247; FP300529; FP312144; FP257920; FP283561; FP253161; FP280254;
CL4152Contig1	FP264799; FP263309; FP311494;
CL4155Contig1	FP278069; FP280980; FP297909;
CL4158Contig1	FP261681; FP260224; FP272052;
CL4160Contig1	FP252504; FP272194; FP272307;
CL4162Contig1	FP300262; FP254350; FP254349;
CL4165Contig1	FP263990; FP249886; FP282822;
CL4168Contig1	FP266384; FP261116; FP270994;
CL4171Contig1	FP312163; FP312044; FP259760;
CL4174Contig1	FP251507; FP293210; FP270243;
CL4177Contig1	FP285757; FP292993; FP310651;
CL4180Contig1	FP301259; FP312371; FP312483;
CL4183Contig1	FP281119; FP267204; FP279028;
CL4186Contig1	FP284308; FP255127; FP246296;
CL4189Contig1	FP257662; FP285341; FP281346;
CL418Contig1	FP248666; FP277177; FP286622; FP289046; FP282039; FP260623; FP260508; FP271403; FP277178; FP282040; FP285653; FP252368; FP289047; FP249949; FP256502; FP291880; FP248667; FP286623;
CL4192Contig1	FP257490; FP265595; FP260564;
CL4195Contig1	FP292208; FP285093; FP305985;
CL4198Contig1	FP245956; FP280877; FP260787;
CL4201Contig1	FP265553; FP284676; FP248287;
CL4204Contig1	FP268119; FP286601; FP272517;
CL4207Contig1	FP255103; FP283295; FP283350;
CL4210Contig1	FP278565; FP261529; FP292291;
CL4213Contig1	FP255268; FP253723; FP252516;
CL4216Contig1	FP270513; FP260288; FP290267;
CL4219Contig1	FP291559; FP272763; FP290322;
CL421Contig1	FP270275; FP254689; FP254690; FP285056; FP255378; FP258062; FP269418; FP271674; FP254993; FP267365; FP248175; FP246628; FP287916; FP301836; FP284526; FP261017; FP285055; FP248174;
CL4222Contig1	FP245890; FP307685; FP282479;
CL4225Contig1	FP283826; FP296935; FP287736;
CL4228Contig1	FP271117; FP290363; FP291195;
CL4232Contig1	FP295919; FP266922; FP265547;
CL4235Contig1	FP262591; FP274640; FP300320;
CL4237Contig1	FP298375; FP263088; FP261875;
CL4240Contig1	FP308263; FP247509; FP292327;
CL4243Contig1	FP253818; FP282560; FP295272;
CL4247Contig1	FP263179; FP286703; FP281554;
CL4249Contig1	FP285233; FP281995; FP281994;
CL4252Contig1	FP247593; FP249329; FP278997;
CL4255Contig1	FP262992; FP262993; FP296225;
CL4258Contig1	FP264407; FP311886; FP311885;
CL425Contig1	FP282235; FP283793; FP248348; FP277163; FP261127; FP253419; FP275352; FP257481; FP301772; FP270351; FP294611; FP247995; FP275351; FP283792; FP277162; FP251602; FP294610; FP285327;
CL4261Contig1	FP260996; FP246664; FP264910;
CL4264Contig1	FP265328; FP246179; FP295106;
CL4267Contig1	FP288877; FP254933; FP310824;
CL4270Contig1	FP247072; FP261156; FP264008;
CL4273Contig1	FP312464; FP258279; FP259761;
CL4276Contig1	FP258110; FP258201; FP257936;
CL4279Contig1	FP255433; FP290342; FP249743;
CL427Contig1	FP276257; FP255880; FP298069; FP256275; FP277856; FP281315; FP282708; FP254456; FP298957; FP271553; FP251524; FP254457; FP257264; FP294851; FP281316; FP282709; FP259207; FP259954;
CL4282Contig1	FP285795; FP280045; FP296226;
CL4285Contig1	FP300359; FP270285; FP290844;
CL4288Contig1	FP252379; FP290847; FP311398;
CL4291Contig1	FP266765; FP266933; FP284480;
CL4294Contig1	FP260629; FP289869; FP264770;
CL4297Contig1	FP262274; FP267340; FP274986;
CL429Contig1	FP248835; FP285163; FP278593; FP264680; FP249694; FP248828; FP297048; FP247570; FP251777; FP253417; FP293172; FP272915; FP272358; FP270813; FP310168; FP266588; FP292766; FP285162;
CL42Contig1	FP248378; FP281306; FP258706; FP280910; FP286490; FP274421; FP254088; FP284078; FP285246; FP285185; FP279952; FP304262; FP254234; FP293499; FP288961; FP278890; FP298789; FP301167; FP280898; FP306632; FP305684; FP298032; FP303147; FP312477; FP312567; FP275408; FP279526; FP284264; FP282087; FP288691; FP278518; FP275538; FP308788; FP279527; FP287051; FP308444; FP304822; FP300728; FP300299; FP293904;…
[truncated: 15,073 more rows]

## Sheet: Genomic sequences
Sequence name	Database	Accession number	Hyperlink
sctg1_116-70300-70600-W	NCBI trace archives	1917760918	http://www.ncbi.nlm.nih.gov/Traces/trace.cgi?&cmd=retrieve&val=1917760918
sctg1_122-362000-362400-W	NCBI trace archives	1306160623	http://www.ncbi.nlm.nih.gov/Traces/trace.cgi?&cmd=retrieve&val=1306160623
sctg1_126-114000-114500-W	NCBI trace archives	1934608735	http://www.ncbi.nlm.nih.gov/Traces/trace.cgi?&cmd=retrieve&val=1934608735
sctg1_155-348500-349100-W	NCBI trace archives	2061325117	http://www.ncbi.nlm.nih.gov/Traces/trace.cgi?&cmd=retrieve&val=2061325117
sctg1_155-382000-382500-W	NCBI trace archives	1934288761	http://www.ncbi.nlm.nih.gov/Traces/trace.cgi?&cmd=retrieve&val=1934288761
sctg1_201-106000-106500-W	NCBI trace archives	1297192904	http://www.ncbi.nlm.nih.gov/Traces/trace.cgi?&cmd=retrieve&val=1297192904
sctg1_230-184000-184500-W	NCBI trace archives	1921520659	http://www.ncbi.nlm.nih.gov/Traces/trace.cgi?&cmd=retrieve&val=1921520659
sctg1_235-54500-54800-W	NCBI trace archives	1934620169	http://www.ncbi.nlm.nih.gov/Traces/trace.cgi?&cmd=retrieve&val=1934620169
sctg1_248-190500-190900-W	NCBI trace archives	1934519197	http://www.ncbi.nlm.nih.gov/Traces/trace.cgi?&cmd=retrieve&val=1934519197
sctg1_256-110400-110800-W	NCBI trace archives	1306738839	http://www.ncbi.nlm.nih.gov/Traces/trace.cgi?&cmd=retrieve&val=1306738839
sctg1_27-379000-379300-W	NCBI trace archives	2060814908	http://www.ncbi.nlm.nih.gov/Traces/trace.cgi?&cmd=retrieve&val=2060814908
sctg1_283-124000-124500-W	NCBI trace archives	1919636431	http://www.ncbi.nlm.nih.gov/Traces/trace.cgi?&cmd=retrieve&val=1919636431
sctg1_318-107000-107400-W	NCBI trace archives	2057601042	http://www.ncbi.nlm.nih.gov/Traces/trace.cgi?&cmd=retrieve&val=2057601042
sctg1_329-181000-181600-W	NCBI trace archives	1299893583	http://www.ncbi.nlm.nih.gov/Traces/trace.cgi?&cmd=retrieve&val=1299893583
sctg1_343-77500-77999-W	NCBI trace archives	1291682340	http://www.ncbi.nlm.nih.gov/Traces/trace.cgi?&cmd=retrieve&val=1291682340
sctg1_393-141200-141600-W	NCBI trace archives	1929834959	http://www.ncbi.nlm.nih.gov/Traces/trace.cgi?&cmd=retrieve&val=1929834959
sctg1_433-19800-20200-W	NCBI trace archives	1306830633	http://www.ncbi.nlm.nih.gov/Traces/trace.cgi?&cmd=retrieve&val=1306830633
sctg1_490-58400-58800-W	NCBI trace archives	2060800181	http://www.ncbi.nlm.nih.gov/Traces/trace.cgi?&cmd=retrieve&val=2060800181
sctg1_504-67400-67700-W	NCBI trace archives	2043055933	http://www.ncbi.nlm.nih.gov/Traces/trace.cgi?&cmd=retrieve&val=2043055933
sctg1_535-34300-34700-W	NCBI trace archives	1934396457	http://www.ncbi.nlm.nih.gov/Traces/trace.cgi?&cmd=retrieve&val=1934396457
sctg1_573-14800-15300-W	NCBI trace archives	1919612644	http://www.ncbi.nlm.nih.gov/Traces/trace.cgi?&cmd=retrieve&val=1919612644

## Sheet: Virus sequences
Sequence name	Accession number	Hyperlink
ESV-1-1	NC_002687.1	http://www.ncbi.nlm.nih.gov/entrez/viewer.fcgi?val=NC_002687.1
ESV-1-2	NC_002687.1
ESV-1-3	NC_002687.1
ESV-1-4	NC_002687.1
ESV-1-5	NC_002687.1
ESV-1-6	NC_002687.1
ESV-1-7	NC_002687.1
ESV-1-8	NC_002687.1
ESV-1-9	NC_002687.1
ESV-1-10	NC_002687.1
ESV-1-11	NC_002687.1
ESV-1-12	NC_002687.1
ESV-1-13	NC_002687.1
ESV-1-14	NC_002687.1
ESV-1-15	NC_002687.1
ESV-1-16	NC_002687.1
ESV-1-17	NC_002687.1
ESV-1-18	NC_002687.1
ESV-1-19	NC_002687.1
ESV-1-20	NC_002687.1
ESV-1-21	NC_002687.1
ESV-1-22	NC_002687.1
ESV-1-23	NC_002687.1
ESV-1-24	NC_002687.1
ESV-1-25	NC_002687.1
ESV-1-26	NC_002687.1
ESV-1-27	NC_002687.1
ESV-1-28	NC_002687.1
ESV-1-29	NC_002687.1
ESV-1-30	NC_002687.1
ESV-1-31	NC_002687.1
ESV-1-32	NC_002687.1
ESV-1-33	NC_002687.1
ESV-1-34	NC_002687.1
ESV-1-35	NC_002687.1
ESV-1-36	NC_002687.1
ESV-1-37	NC_002687.1
ESV-1-38	NC_002687.1
ESV-1-39	NC_002687.1
ESV-1-40	NC_002687.1
ESV-1-41	NC_002687.1
ESV-1-42	NC_002687.1
ESV-1-43	NC_002687.1
ESV-1-44	NC_002687.1
ESV-1-45	NC_002687.1
ESV-1-46	NC_002687.1
ESV-1-47	NC_002687.1
ESV-1-48	NC_002687.1
ESV-1-49	NC_002687.1
ESV-1-50	NC_002687.1
ESV-1-51	NC_002687.1
ESV-1-52	NC_002687.1
ESV-1-53	NC_002687.1
ESV-1-54	NC_002687.1
ESV-1-55	NC_002687.1
ESV-1-56	NC_002687.1
ESV-1-57	NC_002687.1
ESV-1-58	NC_002687.1
ESV-1-59	NC_002687.1
ESV-1-60	NC_002687.1
ESV-1-61	NC_002687.1
ESV-1-62	NC_002687.1
ESV-1-63	NC_002687.1
ESV-1-64	NC_002687.1
ESV-1-65	NC_002687.1
ESV-1-66	NC_002687.1
ESV-1-67	NC_002687.1
ESV-1-68	NC_002687.1
ESV-1-69	NC_002687.1
ESV-1-70	NC_002687.1
ESV-1-71	NC_002687.1
ESV-1-72	NC_002687.1
ESV-1-73	NC_002687.1
ESV-1-74	NC_002687.1
ESV-1-75	NC_002687.1
ESV-1-76	NC_002687.1
ESV-1-77	NC_002687.1
ESV-1-78	NC_002687.1
ESV-1-79	NC_002687.1
ESV-1-80	NC_002687.1
ESV-1-81	NC_002687.1
ESV-1-82	NC_002687.1
ESV-1-83	NC_002687.1
ESV-1-84	NC_002687.1
ESV-1-85	NC_002687.1
ESV-1-86	NC_002687.1
ESV-1-87	NC_002687.1
ESV-1-88	NC_002687.1
ESV-1-89	NC_002687.1
ESV-1-90	NC_002687.1
ESV-1-91	NC_002687.1
ESV-1-92	NC_002687.1
ESV-1-93	NC_002687.1
ESV-1-94	NC_002687.1
ESV-1-95	NC_002687.1
ESV-1-96	NC_002687.1
ESV-1-97	NC_002687.1
ESV-1-98	NC_002687.1
ESV-1-99	NC_002687.1
ESV-1-100	NC_002687.1
ESV-1-101	NC_002687.1
ESV-1-102	NC_002687.1
ESV-1-103	NC_002687.1
ESV-1-104	NC_002687.1
ESV-1-105	NC_002687.1
ESV-1-106	NC_002687.1
ESV-1-107	NC_002687.1
ESV-1-108	NC_002687.1
ESV-1-109	NC_002687.1
ESV-1-110	NC_002687.1
ESV-1-111	NC_002687.1
ESV-1-112	NC_002687.1
ESV-1-113	NC_002687.1
ESV-1-114	NC_002687.1
ESV-1-115	NC_002687.1
ESV-1-116	NC_002687.1
ESV-1-117	NC_002687.1
ESV-1-118	NC_002687.1
ESV-1-119	NC_002687.1
ESV-1-120	NC_002687.1
ESV-1-121	NC_002687.1
ESV-1-122	NC_002687.1
ESV-1-123	NC_002687.1
ESV-1-124	NC_002687.1
ESV-1-125	NC_002687.1
ESV-1-126	NC_002687.1
ESV-1-127	NC_002687.1
ESV-1-128	NC_002687.1
ESV-1-129	NC_002687.1
ESV-1-130	NC_002687.1
ESV-1-131	NC_002687.1
ESV-1-132	NC_002687.1
ESV-1-133	NC_002687.1
ESV-1-134	NC_002687.1
ESV-1-135	NC_002687.1
ESV-1-136	NC_002687.1
ESV-1-137	NC_002687.1
ESV-1-138	NC_002687.1
ESV-1-139	NC_002687.1
ESV-1-140	NC_002687.1
ESV-1-141	NC_002687.1
ESV-1-142	NC_002687.1
ESV-1-143	NC_002687.1
ESV-1-144	NC_002687.1
ESV-1-145	NC_002687.1
ESV-1-146	NC_002687.1
ESV-1-147	NC_002687.1
ESV-1-148	NC_002687.1
ESV-1-149	NC_002687.1
ESV-1-150	NC_002687.1
ESV-1-151	NC_002687.1
ESV-1-152	NC_002687.1
ESV-1-153	NC_002687.1
ESV-1-154	NC_002687.1
ESV-1-155	NC_002687.1
ESV-1-156	NC_002687.1
ESV-1-157	NC_002687.1
ESV-1-158	NC_002687.1
ESV-1-159	NC_002687.1
ESV-1-160	NC_002687.1
ESV-1-161	NC_002687.1
ESV-1-162	NC_002687.1
ESV-1-163	NC_002687.1
ESV-1-164	NC_002687.1
ESV-1-165	NC_002687.1
ESV-1-166	NC_002687.1
ESV-1-167	NC_002687.1
ESV-1-168	NC_002687.1
ESV-1-169	NC_002687.1
ESV-1-170	NC_002687.1
ESV-1-171	NC_002687.1
ESV-1-172	NC_002687.1
ESV-1-173	NC_002687.1
ESV-1-174	NC_002687.1
ESV-1-175	NC_002687.1
ESV-1-176	NC_002687.1
ESV-1-177	NC_002687.1
ESV-1-178	NC_002687.1
ESV-1-179	NC_002687.1
ESV-1-180	NC_002687.1
ESV-1-181	NC_002687.1
ESV-1-182	NC_002687.1
ESV-1-183	NC_002687.1
ESV-1-184	NC_002687.1
ESV-1-185	NC_002687.1
ESV-1-186	NC_002687.1
ESV-1-187	NC_002687.1
ESV-1-188	NC_002687.1
ESV-1-189	NC_002687.1
ESV-1-190	NC_002687.1
ESV-1-191	NC_002687.1
ESV-1-192	NC_002687.1
ESV-1-193	NC_002687.1
ESV-1-194	NC_002687.1
ESV-1-195	NC_002687.1
ESV-1-196	NC_002687.1
ESV-1-197	NC_002687.1
ESV-1-198	NC_002687.1
ESV-1-199	NC_002687.1
ESV-1-200	NC_002687.1
ESV-1-201	NC_002687.1
ESV-1-202	NC_002687.1
ESV-1-203	NC_002687.1
ESV-1-204	NC_002687.1
ESV-1-205	NC_002687.1
ESV-1-206	NC_002687.1
ESV-1-207	NC_002687.1
ESV-1-208	NC_002687.1
ESV-1-209	NC_002687.1
ESV-1-210	NC_002687.1
ESV-1-211	NC_002687.1
ESV-1-212	NC_002687.1
ESV-1-213	NC_002687.1
ESV-1-214	NC_002687.1
ESV-1-215	NC_002687.1
ESV-1-216	NC_002687.1
ESV-1-217	NC_002687.1
ESV-1-218	NC_002687.1
ESV-1-219	NC_002687.1
ESV-1-220	NC_002687.1
ESV-1-221	NC_002687.1
ESV-1-222	NC_002687.1
ESV-1-223	NC_002687.1
ESV-1-224	NC_002687.1
ESV-1-225	NC_002687.1
ESV-1-226	NC_002687.1
ESV-1-227	NC_002687.1
ESV-1-228	NC_002687.1
ESV-1-229	NC_002687.1
ESV-1-230	NC_002687.1
ESV-1-231	NC_002687.1
